# Supplementary material for: Chiral Brønsted acid-catalysed enantioselective allylboration of sterically hindered aldehydes enabled by multiple hydrogen bonding interactions
Source: Royal Society of Chemistry journal article supplement (doi:10.1039/d4sc08443h), 2025-01-01
Supplement: d4sc08443h1.pdf [file d4sc08443h1.pdf]

## Supplementary Information

### Chiral Brønsted Acid-Catalysed Enantioselective Allylboration of Sterically Hindered Aldehydes Enabled by Multiple Hydrogen Bonding Interactions

Shigenobu Umemiya, Sotaro Osaka, Naoya Shinagawa, Takumi Hirata, Masahiro Terada

#### Contents

|                                                                           |     |
|---------------------------------------------------------------------------|-----|
| 1. General Information                                                    | S2  |
| 2. Catalyst Synthesis                                                     | S3  |
| 3. Substrate Synthesis                                                    | S3  |
| 4. Asymmetric Allylation/Crotylation Reaction with Chiral Phosphoramidate | S11 |
| 5. Derivatization                                                         | S17 |
| 6. References                                                             | S19 |
| 7. Optimization of allylboration of pivalaldehyde                         | S20 |
| 8. Comparison of enantioselectivities in substrate scope                  | S21 |
| 9. DFT Calculation                                                        | S22 |
| 10. NMR Spectra                                                           | S39 |
| 11. HPLC and SFC Charts                                                   | S80 |

## 1. General Information

All reactions were conducted under a nitrogen atmosphere in flame-dried glassware. Dichloromethane (DCM), diethyl ether (Et<sub>2</sub>O), toluene, and tetrahydrofuran (THF) were supplied from KANTO Chemical Co., Inc. as “Dehydrated solvent system”. Other solvents and reagents were purchased from commercial suppliers and used without further purification. Aldehydes especially not mentioned were commercially available, each of which was freshly distilled before use. Allyl boronic acid pinacol ester was purchased from Combi-Blocks Inc. Purification of reaction products was conducted by flash column chromatography using silica gel 60 N (Merck 40-63  $\mu$ m). Analytical thin layer chromatography (TLC) was performed on Merck precoated TLC plates (silica gel 60 GF 254, 0.25 mm). <sup>1</sup>H NMR spectra were recorded on a JEOL ECA-600 (600 MHz) spectrometer. Chemical shifts are reported in ppm from tetramethylsilane or solvent resonance as the internal standard (CDCl<sub>3</sub>: 7.26 ppm, TMS: 0.00 ppm). <sup>13</sup>C NMR spectra were recorded on a JEOL ECA-600 (151 MHz) spectrometer with complete proton decoupling. Chemical shifts are reported in ppm from the solvent resonance as the internal standard (CDCl<sub>3</sub>: 77.0 ppm). Infrared spectra were recorded on a Jasco FT/IR-4100 spectrometer. Chiral stationary phase HPLC analysis was performed on a Jasco LC-2000 Plus Series system with DACIEL chiral analytical column (4.6 mm $\Phi$ \* 250 mm length). Optical rotations were measured on a Jasco P1020 digital polarimeter with a sodium lamp and reported as follows; [ $\alpha$ ]<sub>T</sub><sup>o</sup>CD (c = g/100 mL, solvent). Mass spectra analysis using ESI ionization method was performed on a Bruker Daltonics solariX 9.4T spectrometer and the FD method was performed using a JEOL JMS-T100GC spectrometer at the Research and Analytical Center for Giant Molecules, Graduate School of Science, Tohoku University.

## 2. Catalyst Synthesis

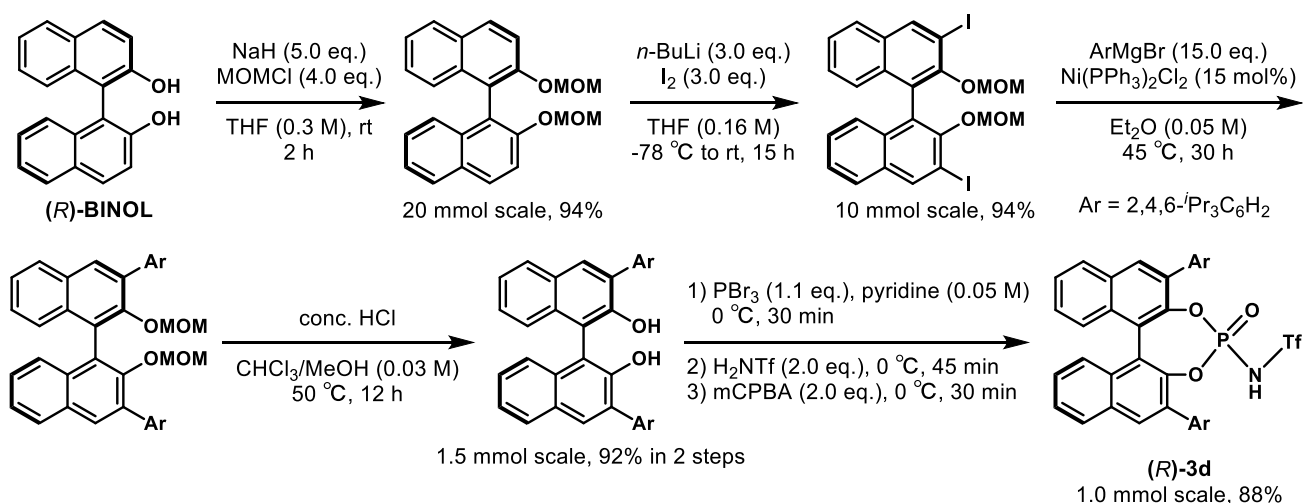

## 3. Preparation of Substrates

Preparation of mono-protected neopentyl glycol

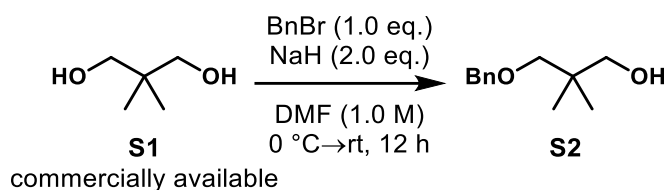

To a solution of **S1** (1.25 g, 12 mmol, 1.2 eq.) in DMF (12 mL, 0.8 M) was added NaH (800 mg, 20 mmol, 2.0 eq.) at 0 °C. After stirring the mixture for an hour, BnBr (1.2 mL, 10 mmol, 1.0 eq.) was slowly added at the same temperature. The reaction was warmed up to room temperature and stirred for 12 h. The reaction was cooled to 0 °C and quenched with aq. NH<sub>4</sub>Cl. The resulting mixture was extracted with Et<sub>2</sub>O, and the combined extracts were washed with brine, dried over MgSO<sub>4</sub>, filtered, and concentrated in vacuo. The residue was purified by flash column chromatography on silica gel (Hexane/EtOAc = 5/1 to 2/1) to give **S2** (1.5g, 8.0 mmol) in 80% yield as a colorless oil. All spectroscopic data for **S2** was known.<sup>[1]</sup>

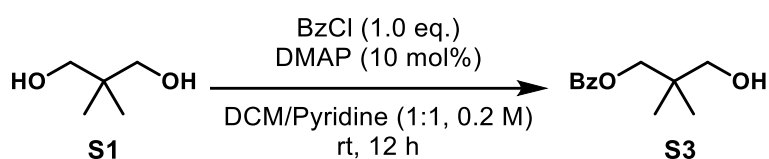

To a solution of **S1** (2.6 g, 25 mmol, 5.0 eq.), DMAP (61 mg, 0.5 mmol, 10 mol%) in DCM and pyridine (1:1, 25 mL, 0.2 M) was added BzCl (580 μL, 5.0 mmol, 1.0 eq.) at room temperature. The reaction was stirred for 12 h. The reaction was cooled to 0 °C and quenched with aq. NH<sub>4</sub>Cl. The resulting mixture was extracted with EtOAc, and the combined extracts were washed with brine, dried over MgSO<sub>4</sub>, filtered, and concentrated in vacuo. The residue was purified by flash column chromatography on silica gel (Hexane/EtOAc = 5/1 to 2/1) to give **S3** (972.7 mg, 4.7 mmol) in 94% yield as a colorless oil. All spectroscopic data for **S3** was known.<sup>[2]</sup>

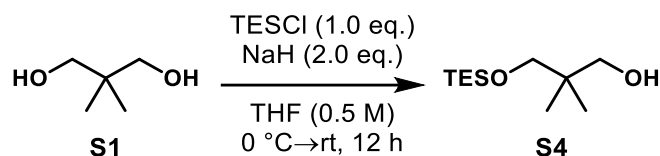

To a solution of **S1** (2.6 g, 25 mmol, 5.0 eq.) in THF (10 mL, 0.5 M) was added NaH (400 mg, 10 mmol, 2.0 eq.) at 0 °C. After stirring the mixture for an hour, TESCl (837  $\mu\text{L}$ , 5.0 mmol, 1.0 eq.) was slowly added at the same temperature. The reaction was warmed up to room temperature and stirred for 4 h. The reaction was cooled to 0 °C and quenched with aq.  $\text{NH}_4\text{Cl}$ . The resulting mixture was extracted with  $\text{Et}_2\text{O}$ , and the combined extracts were washed with brine, dried over  $\text{MgSO}_4$ , filtered, and concentrated in vacuo. The residue was purified by flash column chromatography on silica gel (Hexane/ $\text{EtOAc}$  = 10/1 to 5/1) to give **S4** (1.03 g, 4.75 mmol) in 95% yield as a colorless oil.

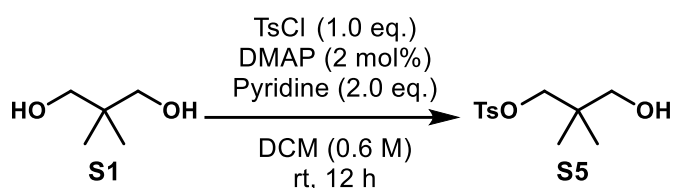

A solution of **S1** (2.6 g, 25 mmol, 5.0 eq.), DMAP (61 mg, 0.1 mmol, 2 mol%) and pyridine (807  $\mu\text{L}$ , 2.0 eq.) in DCM (12.2 mL, 0.4 M) was stirred for 15 minutes, then TsCl (953.2 mg, 5.0 mmol, 1.0 eq.) was added to the mixture at room temperature. The reaction was stirred for 12 h. The reaction was quenched with  $\text{H}_2\text{O}$ . The resulting mixture was extracted with DCM, and the combined extracts were dried over  $\text{MgSO}_4$ , filtered, and concentrated in vacuo. The residue was purified by flash column chromatography on silica gel (Hexane/ $\text{EtOAc}$  = 5/1 to 1/1) to give **S5** (1.26 g, 5.0 mmol) in quantitative yield as a colorless oil. All spectroscopic data for **S5** was known.<sup>[3]</sup>

#### Preparation of aldehyde **1b-1e**

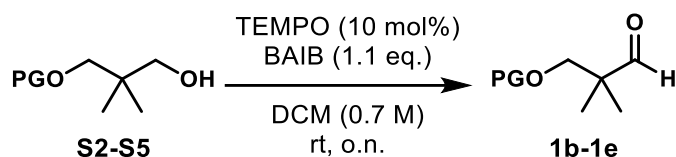

General Procedure: To a solution of alcohol and TEMPO (10 mol%) in DCM (0.7 M) was added phenyliodine(III) diacetate (PIDA) (1.1 eq.) at room temperature. The reaction was stirred overnight at room temperature. The reaction was cooled at 0 °C, added aq.  $\text{Na}_2\text{S}_2\text{O}_3$  (5 mL) and aq.  $\text{NaHCO}_3$  (5 mL), and stirred vigorously for 10 minutes at the same temperature. Then, the resulting mixture was extracted with  $\text{Et}_2\text{O}$  for 3 times. The organic layers were combined, washed with aq.  $\text{NaHCO}_3$  for twice and brine, dried over  $\text{MgSO}_4$ , filtered, and concentrated in vacuo. The residue was purified by flash column chromatography on silica gel (Hexane/ $\text{EtOAc}$ ) to give the corresponding aldehyde.

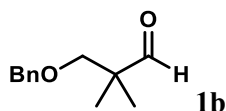



80% yield; red oil; Hexane/ Ether = 20/1

All spectroscopic data for **1b** was known.<sup>[4]</sup>

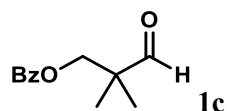

83% yield; red oil; Hexane/EtOAc = 1/0 to 20/1

All spectroscopic data for **1c** was known.<sup>[5]</sup>

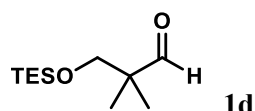

90% yield; red oil; Hexane/EtOAc = 1/0 to 10/1

All spectroscopic data for **1d** was known.<sup>[6]</sup>

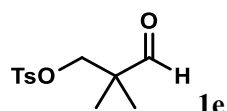

52% yield; white solid; Hexane/EtOAc = 50/1 to 5/1

$R_f = 0.34$  (Hexane/EtOAc = 3/1)

<sup>1</sup>H NMR (600 MHz, CDCl<sub>3</sub>)  $\delta$  9.42 (s, 1H), 7.78 (d,  $J = 8.2$  Hz, 2H), 7.36 (d,  $J = 7.9$  Hz, 2H), 4.00 (s, 2H), 2.46 (s, 3H), 1.10 (s, 6H).

<sup>13</sup>C NMR (151 MHz, CDCl<sub>3</sub>)  $\delta$  202.5 (1C), 145.2 (1C), 132.4 (1C), 130.0 (2C), 128.1 (2C), 73.2 (1C), 46.3 (1C), 21.7 (1C), 18.9 (2C).

HRMS (ESI)  $m/z$ : [M+Na]<sup>+</sup> Calcd for C<sub>12</sub>H<sub>16</sub>O<sub>4</sub>SNa 279.0661, Found 279.0661.

### Preparation of aldehyde **1h**

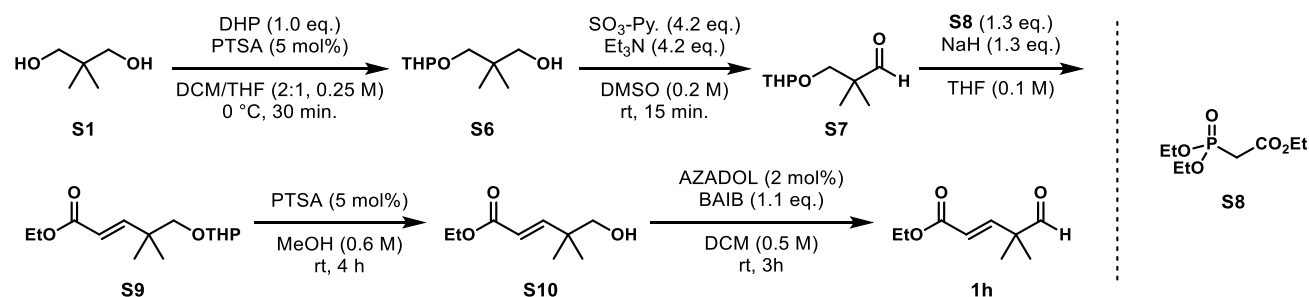

2,2-dimethyl-3-((tetrahydro-2H-pyran-2-yl)oxy)propan-1-ol (**S6**)

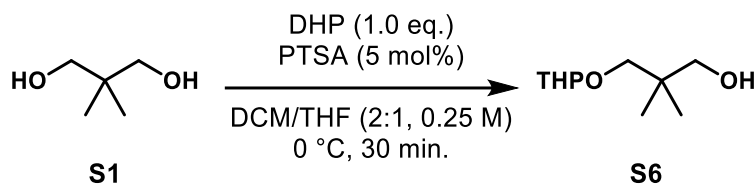

To a solution of **S1** (2.6 g, 25 mmol, 5.0 eq.) and 3,4-dihydro-2H-pyran (DHP) (457  $\mu$ L, 5.0 mmol, 1.0 eq.) in DCM and THF (2:1, 2.0 mL, 0.25 M) was added *p*-toluenesulfonic acid (PTSA) (47.6 mg, 0.25 mmol, 5 mol%) at 0 °C. The reaction was stirred for 30 minutes. The reaction was quenched with aq.  $\text{NaHCO}_3$  at the same temperature. The resulting mixture was extracted with DCM, and the combined extracts were washed with brine, dried over  $\text{MgSO}_4$ , filtered, and concentrated in vacuo. The residue was purified by flash column chromatography on silica gel (Hexane/EtOAc = 9/1 to 3/1) to give **S6** (733 mg, 3.9 mmol) in 78% yield as a colorless oil. All spectroscopic data for **S6** was known.<sup>[7]</sup>

2,2-dimethyl-3-((tetrahydro-2H-pyran-2-yl)oxy)propanal (**S7**)

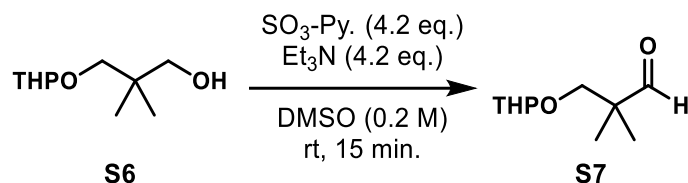

To a solution of **S6** (560.5 mg, 3 mmol, 1.0 eq.) and  $\text{Et}_3\text{N}$  (1.86 mL, 13.4 mmol, 4.2 eq.) in DMSO (15 mL, 0.2 M) was added  $\text{SO}_3$ -Pyridine (2.0 g, 13.4 mmol, 4.2 eq.) at room temperature. The reaction was stirred for 15 minutes. The reaction was quenched with 1 N HCl aq. at the same temperature. The resulting mixture was extracted with  $\text{Et}_2\text{O}$ , and the combined extracts were dried over  $\text{MgSO}_4$ , filtered, and concentrated in vacuo. The residue was purified by flash column chromatography on silica gel (Hexane/EtOAc = 15/1 to 10/1) to give **S7** (516.4 mg, 2.8 mmol) in 92% yield as a colorless oil. All spectroscopic data for **S7** was known.<sup>[8]</sup>

ethyl (*E*)-4,4-dimethyl-5-((tetrahydro-2H-pyran-2-yl)oxy)pent-2-enoate (**S9**)

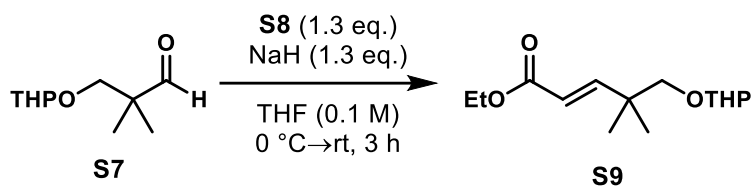

To a suspension of  $\text{NaH}$  (400 mg, 10 mmol, 1.3 eq.) in THF (70 mL, 0.1 M) was added **S8** (2 mL, 10 mmol, 1.3 eq.) at 0 °C. After stirring the mixture for 30 minutes, **S7** (1.43 g, 7.7 mmol, 1.0 eq.) in THF (7 mL) was slowly added at the same temperature. The reaction was warmed up to room temperature and stirred until TLC showed complete conversion of starting material. The reaction was cooled to 0 °C and quenched with aq.  $\text{NH}_4\text{Cl}$ . The resulting mixture was extracted with EtOAc, and the combined extracts were washed with brine, dried over  $\text{MgSO}_4$ , filtered, and concentrated in vacuo. The product was directly used in the next step without further purification.

ethyl (*E*)-5-hydroxy-4,4-dimethylpent-2-enoate (**S10**)

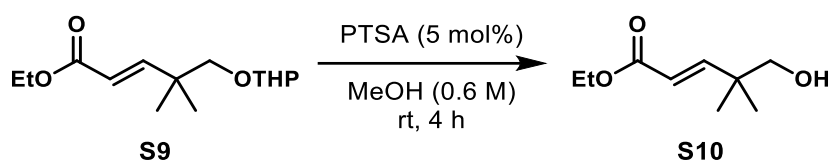

To a crude of **S9** in MeOH (12.8 mL, 0.6 M) was added PTSA (672 mg, 0.39 mmol, 5 mol%) at 0 °C and the mixture was warmed to room temperature. The reaction was stirred for 4 h at the same temperature and then was quenched with aq. NaHCO<sub>3</sub>. The resulting mixture was extracted with EtOAc, and the combined extracts were washed with brine, dried over MgSO<sub>4</sub>, filtered, and concentrated in vacuo. The residue was purified by flash column chromatography on silica gel (Hexane/EtOAc = 15/1 to 10/1) to give **S10** (1.31 g, 7.7 mmol) in quantitative yield as a colorless oil. All spectroscopic data for **S10** was known.<sup>[9]</sup>

ethyl (*E*)-4,4-dimethyl-5-oxopent-2-enoate (**1h**)

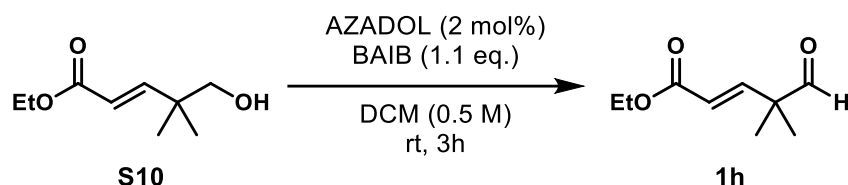

To a solution of **S10** (172.2 mg, 2.0 mmol, 1.0 eq.) and AZADOL<sup>®</sup> (3.0 mg, 0.04 mmol, 2 mol%) in DCM (5.0 mL 0.5 M) was added phenyliodine(III) diacetate (PIDA) (354.3 mg, 2.2 mmol, 1.1 eq.) at room temperature. The reaction was stirred until TLC showed complete conversion of starting material. The reaction was cooled at 0 °C, added aq. Na<sub>2</sub>S<sub>2</sub>O<sub>3</sub> (5 mL) and aq. NaHCO<sub>3</sub> (5 mL), and stirred vigorously for 10 minutes at the same temperature. Then, the resulting mixture was extracted with Et<sub>2</sub>O for 3 times. The organic layers were combined, washed with aq. NaHCO<sub>3</sub> for 2 times and brine, dried over MgSO<sub>4</sub>, filtered, and concentrated in vacuo. The residue was purified by flash column chromatography on silica gel (Hexane/EtOAc = 15/1 to 10/1) to give **1h** (322.4 mg, 1.9 mmol) in 95% yield as a colorless oil. All spectroscopic data for **1h** was known.<sup>[9]</sup>

Preparation of aldehyde **1i**

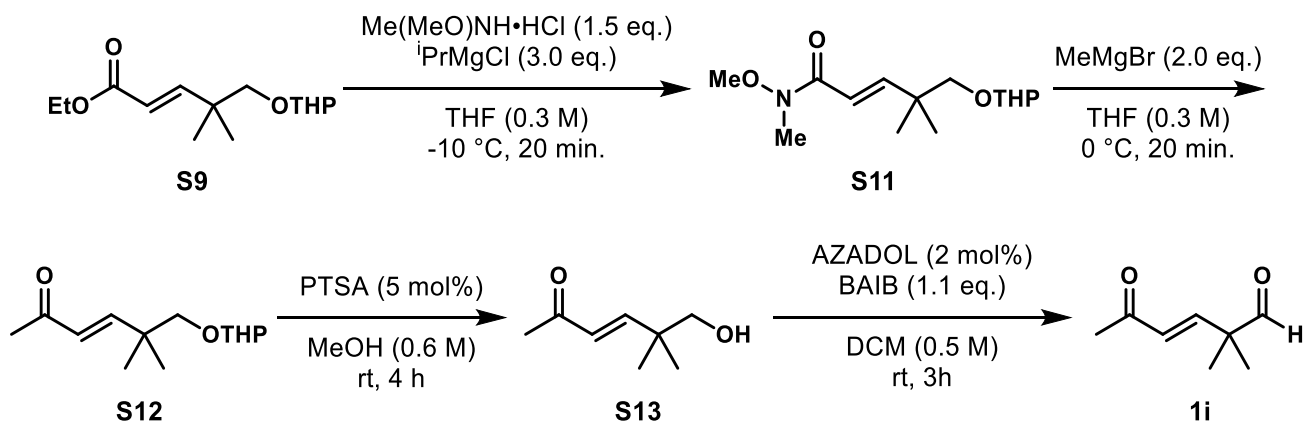

(*E*)-*N*-methoxy-*N*,4,4-trimethyl-5-((tetrahydro-2*H*-pyran-2-yl)oxy)pent-2-enamide (**S11**)

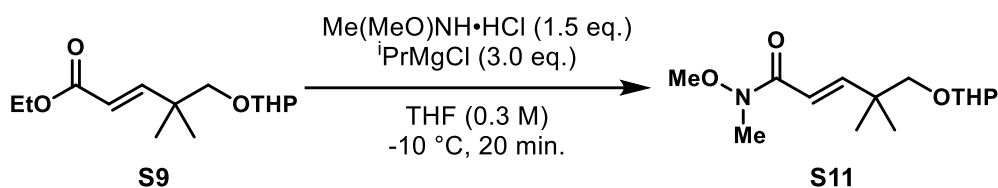

To a solution of **S9** (151.5 mg, 0.6 mmol, 1.0 eq.) and Me(MeO)NH·HCl (87.8 mg, 0.9 mmol, 1.5 eq.) in THF (2 mL, 0.3 M) was added <sup>i</sup>PrMgCl (2.0 M in THF, 900 μL, 3.0 eq.) at -10 °C. The reaction was stirred for 20 minutes. The reaction was quenched with aq. NH<sub>4</sub>Cl at the same temperature. The resulting mixture was extracted with EtOAc, and the combined extracts were washed with brine, dried over MgSO<sub>4</sub>, filtered, and concentrated in vacuo. The residue was purified by flash column chromatography on silica gel (Hexane/EtOAc = 5/1 to 1/1) to give **S11** (149 mg, 0.55 mmol) in 92% yield as a colorless oil.

R<sub>f</sub> = 0.39 (Hexane/EtOAc = 1/1).

<sup>1</sup>H NMR (600 MHz, CDCl<sub>3</sub>) δ 7.02 (d, *J* = 15.8 Hz, 1H), 6.40 (d, *J* = 15.8 Hz, 1H), 4.58 (t, *J* = 3.3 Hz, 1H), 3.84-3.81 (ddd, 1H), 3.70 (s, 3H), 3.60 (d, *J* = 9.3 Hz, 1H), 3.52-3.49 (ddd, 1H), 3.25 (s, 3H), 3.17 (d, *J* = 9.3 Hz, 1H), 1.84-1.78 (m, 1H), 1.70-1.65 (m, 1H), 1.61-1.50 (m, 6H), 1.14-1.09 (m, 6H).

<sup>13</sup>C NMR (151 MHz, CDCl<sub>3</sub>) δ 167.3 (1C), 154.2 (1C), 116.0 (1C), 98.9 (1C), 75.5 (1C), 61.9 (1C), 61.7 (1C), 38.0 (1C), 32.5 (1C), 30.5 (1C), 25.6 (1C), 24.2 (1C), 24.2 (1C), 19.3 (1C).

HRMS (ESI) *m/z*: [M+Na]<sup>+</sup> Calcd for C<sub>14</sub>H<sub>25</sub>NO<sub>4</sub>Na 294.1676, Found 294.1676.

(*E*)-5,5-dimethyl-6-((tetrahydro-2*H*-pyran-2-yl)oxy)hex-3-en-2-one

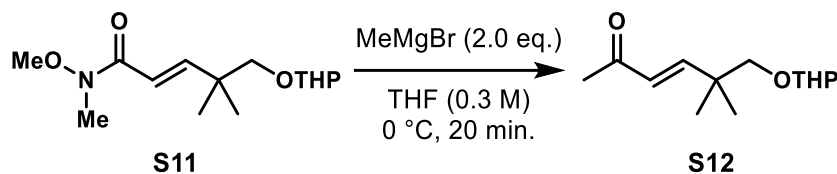

To a solution of **S11** (149 mg, 0.55 mmol, 1.0 eq.) in THF (1.83 mL, 0.3 M) was added MeMgBr (3.0 M in Et<sub>2</sub>O, 370 μL, 2.0 eq.) at 0 °C. The reaction was stirred for 20 minutes. The reaction was quenched with aq. NH<sub>4</sub>Cl at the same temperature. The resulting mixture was extracted with EtOAc, and the combined extracts were washed with brine, dried over MgSO<sub>4</sub>, filtered, and concentrated in vacuo. The residue was purified by flash column chromatography on silica gel (Hexane/EtOAc = 10/1 to 4/1) to give **S12** (98.1 mg, 0.43 mmol) in 78% yield as a colorless oil.

R<sub>f</sub> = 0.18 (Hexane/EtOAc = 5/1).

<sup>1</sup>H NMR (600 MHz, CDCl<sub>3</sub>) δ 6.86 (d, *J* = 16.5 Hz, 1H), 6.07 (d, *J* = 16.2 Hz, 1H), 4.57 (t, *J* = 3.3 Hz, 1H), 3.83-3.79 (ddd, 1H), 3.60 (d, *J* = 9.3 Hz, 1H), 3.53-3.49 (m, 1H), 3.16 (d, *J* = 9.3 Hz, 1H), 2.26 (s, 3H), 1.84-1.78 (m, 1H), 1.72-1.67 (m, 1H), 1.62-1.50 (m, 5H), 1.12 (d, *J* = 7.6 Hz, 6H).

$^{13}\text{C}$  NMR (151 MHz,  $\text{CDCl}_3$ )  $\delta$  199.2 (1C), 154.9 (1C), 128.4 (1C), 99.0 (1C), 75.5 (1C), 62.0 (1C), 38.0 (1C), 30.5 (1C), 27.0 (1C), 25.5 (1C), 24.0 (1C), 23.9 (1C), 19.4 (1C).

HRMS (ESI)  $m/z$ :  $[\text{M}+\text{Na}]^+$  Calcd for  $\text{C}_{13}\text{H}_{22}\text{O}_3\text{Na}$  249.1461, Found 249.1461.

(E)-6-hydroxy-5,5-dimethylhex-3-en-2-one (**S13**)

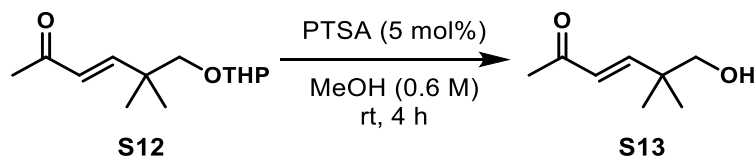

To a solution of **S12** (1.2 mmol, 1.0 eq.) in MeOH (2.0 mL, 0.6 M) was added PTSA (10.3 mg, 0.06 mmol, 5 mol%) at 0 °C. The reaction was stirred for 4 h. The reaction was quenched with aq.  $\text{NaHCO}_3$  at the same temperature. The resulting mixture was extracted with EtOAc, and the combined extracts were washed with brine, dried over  $\text{MgSO}_4$ , filtered, and concentrated in vacuo. The product was directly used in the next step without further purification.

(E)-2,2-dimethyl-5-oxohex-3-enal (**1i**)

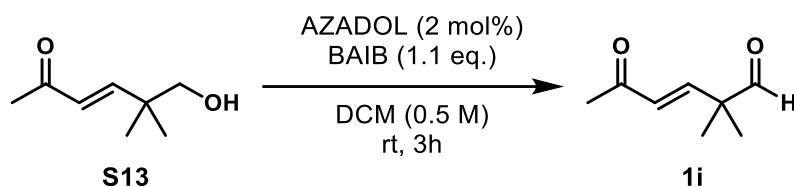

To a crude of **S13** and AZADOL<sup>®</sup> (3.7 mg, 0.024 mmol, 2 mol%) in DCM (2.4 mL 0.5 M) was added phenyliodine(III) diacetate (PIDA) (425.2 mg, 1.32 mmol, 1.1 eq.) at room temperature. The reaction was stirred until TLC showed complete conversion of starting material. The reaction was cooled at 0 °C, added aq.  $\text{Na}_2\text{S}_2\text{O}_3$  (5 mL) and aq.  $\text{NaHCO}_3$  (5 mL), and stirred vigorously for 10 minutes at the same temperature. Then, the resulting mixture was extracted with  $\text{Et}_2\text{O}$  for 3 times. The organic layers were combined, washed with aq.  $\text{NaHCO}_3$  for 2 times and brine, dried over  $\text{MgSO}_4$ , filtered, and concentrated in vacuo. The residue was purified by flash column chromatography on silica gel (Hexane/EtOAc = 10/1 to 5/1) to give **1i** (132.9 mg, 0.95 mmol) in 82% yield in 2 steps as a colorless oil. All spectroscopic data for **1i** was known.<sup>[10]</sup>

Preparation of aldehyde **1q**

(R)-3-((4-methoxybenzyl)oxy)butanal (**1q**)

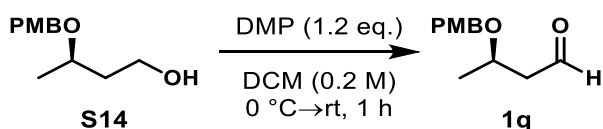

To a solution of known alcohol **S14**<sup>[1]</sup> (210.3 mg, 1.0 mmol, 1.0 eq.) in DCM (5.0 mL, 0.2 M) was added Dess-Martin periodinane (DMP) (509 mg, 1.2 mmol, 1.2 eq.) at 0 °C. The reaction was carefully warmed up to room temperature. The reaction was quenched with 1:1 mixture of aq.  $\text{Na}_2\text{S}_2\text{O}_3$  and aq.  $\text{NaHCO}_3$ . The resulting mixture was extracted with EtOAc, and the combined extracts were washed with brine, dried over  $\text{MgSO}_4$ , filtered, and

concentrated in vacuo. The residue was quickly purified by flash column chromatography on silica gel (Hexane/EtOAc = 10/1 to 1/1) to give **1q** (207 mg, 1.0 mmol) in quantitative yield as a colorless oil. All spectroscopic data for **1q** was known.<sup>[11]</sup>

Preparation of aldehyde **1o**, **1p**, **1u**

The aldehyde was prepared according to the procedure reported in the literature.<sup>[12]</sup>

### 3. Asymmetric Allylation/Crotylation Reactions with Chiral Phosphoramidate

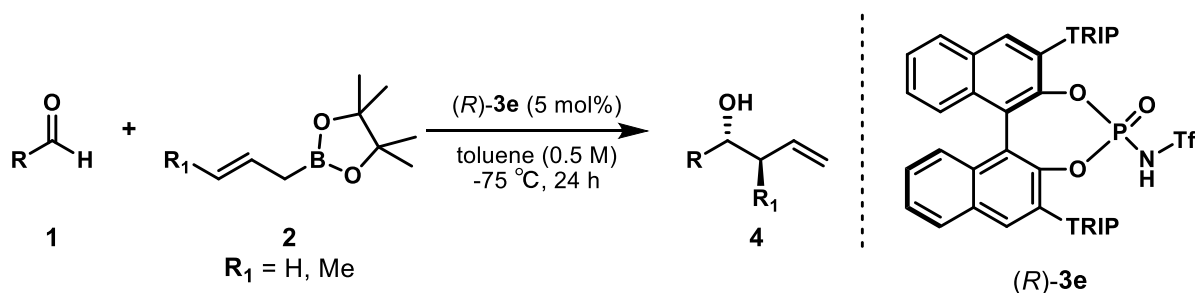

General Procedure: To a solution of **1** (0.2 mmol, 1.0 eq.), (*R*)-**3e** (8.8 mg, 0.01 mmol, 5 mol%) in toluene (200  $\mu\text{L}$ ) was added to boron reagent **2**<sup>[13]</sup> (0.24 mmol, 1.5 eq.) in toluene (200  $\mu\text{L}$ ) at  $-75^\circ\text{C}$  under an atmosphere of nitrogen. The reaction was stirred for 24 h. The reaction was quenched with aq.  $\text{NaHCO}_3$  at the same temperature. The aqueous phase was extracted with EtOAc, the organic layers were combined, dried over  $\text{MgSO}_4$ , filtered, and concentrated in vacuo. The residue was purified by flash column chromatography on silica gel (Hexane/EtOAc) to give a homoallylic alcohol **4**.

#### (*R*)-2,2-dimethylhex-5-en-3-ol (**4a**)

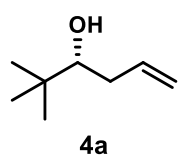

Purification with column chromatography on silica gel (Hexane/EtOAc = 20/1 to 5/1); quantitative yield (46.9 mg); colorless oil;  $[\alpha]_{\text{D}}^{25.0}$ : +3.2 ( $c = 8.0$ ,  $\text{CHCl}_3$ ); Literature date<sup>[14]</sup>;  $[\alpha]_{\text{D}}^{20.0}$ : +2.6 ( $c = 10.0$ ,  $\text{CHCl}_3$ );  $R_f = 0.35$  (Hexane/EtOAc = 10/1);  $^1\text{H NMR}$  (600 MHz,  $\text{CDCl}_3$ )  $\delta$  5.90-5.83 (m, 1H), 5.17-5.14 (m, 2H), 3.26 (dd,  $J = 10.2, 1.8$  Hz, 1H), 2.39-2.35 (m, 1H), 2.01-1.96 (m, 1H), 0.93 (s, 9H);  $^{13}\text{C NMR}$  (151 MHz,  $\text{CDCl}_3$ )  $\delta$  136.7 (1C), 117.7 (1C), 78.2 (1C), 36.6 (1C), 34.7 (1C), 25.8 (3C).

All spectroscopic data for **4b** was known.<sup>[14]</sup>

Enantiomeric excess of **4a** was determined by HPLC analysis of benzoate derivative **S16** according to the below scheme.

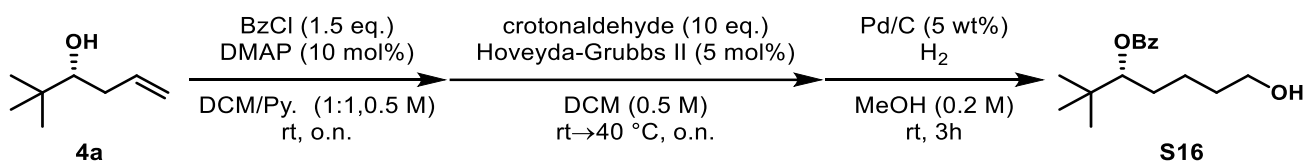

HPLC analysis: Chiralcel AD-3 column (Hexane/ $i$ PrOH = 97/3, 1.0 mL/min,  $40^\circ\text{C}$ , 254 nm),  $t_R$  major = 17.950 min,  $t_R$  minor = 16.308 min; 95% ee,

#### (*S*)-1-(benzyloxy)-2,2-dimethylhex-5-en-3-ol (**4b**)

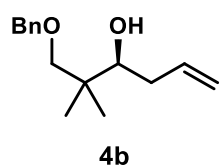

Purification with column chromatography on silica gel (Hexane/EtOAc = 20/1 to 5/1); 85% yield (46.9 mg); colorless oil;  $[\alpha]_{\text{D}}^{23.5}$ : -12.3 ( $c = 0.13$ ,  $\text{CHCl}_3$ );  $R_f = 0.26$  (Hexane/EtOAc = 10/1); HPLC analysis: Chiralcel AD-3 column (Hexane/ $i$ PrOH = 98/2, 0.7 mL/min,  $30^\circ\text{C}$ , 254 nm),  $t_R$  major = 11.000 min,  $t_R$  minor = 10.400 min; 90% ee;  $^1\text{H NMR}$  (600 MHz,  $\text{CDCl}_3$ )  $\delta$  7.36-7.27 (m, 5H), 5.96-5.89 (m, 1H), 5.13-5.07 (m, 2H), 4.51 (s, 2H), 3.54 (d,  $J = 10.8$  Hz, 1H), 3.39 (d,  $J = 8.4$  Hz, 1H), 3.30 (d,  $J = 8.4$  Hz, 1H), 3.09 (s, 1H), 2.30-2.26 (m, 1H), 2.09-2.04 (m, 1H), 0.94 (s, 3H), 0.92 (s, 3H);  $^{13}\text{C NMR}$

NMR (151 MHz, CDCl<sub>3</sub>)  $\delta$  138.0 (1C), 136.9 (1C), 128.5 (2C), 127.8 (1C), 127.6 (2C), 116.7 (1C), 79.7 (1C), 77.6 (1C), 73.7 (1C), 38.5 (1C), 36.6 (1C), 22.7 (1C), 19.7 (1C).

All spectroscopic data for **4b** was known.<sup>[15]</sup>

(*S*)-3-hydroxy-2,2-dimethylhex-5-en-1-yl benzoate (**4c**)

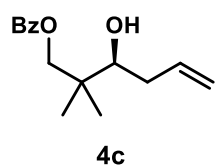

Purification with column chromatography on silica gel (Hexane/EtOAc = 20/1 to 5/1); 95% yield (47.2 mg); colorless oil;  $[\alpha]_D^{26.7}$ : -4.11 ( $c = 0.125$ , CHCl<sub>3</sub>);  $R_f = 0.17$  (Hexane/EtOAc = 10/1); HPLC analysis: Chiralcel AD-3 column (Hexane/<sup>i</sup>PrOH = 98/2, 0.7 mL/min, 30 °C, 254 nm),  $t_R$  major = 26.392 min,  $t_R$  minor = 25.425 min; 92% ee; <sup>1</sup>H NMR (600 MHz, CDCl<sub>3</sub>)  $\delta$  8.05 (dd,  $J = 8.4, 1.8$  Hz, 2H), 7.59-7.56 (dt,  $J = 7.2, 1.2$  Hz, 1H), 7.46 (dd,  $J = 8.4, 7.2$  Hz, 2H), 5.91-5.84 (m, 1H), 5.18-5.14 (m, 2H), 4.41 (d,  $J = 10.2$  Hz, 1H), 4.06 (d,  $J = 11.4$  Hz, 1H), 3.54 (d,  $J = 10.8$  Hz, 1H), 2.39 (m, 1H), 2.14-2.09 (m, 2H), 1.05 (s, 3H), 1.03 (s, 3H); <sup>13</sup>C NMR (151 MHz, CDCl<sub>3</sub>)  $\delta$  166.9 (1C), 136.2 (1C), 133.1 (1C), 130.3 (1C), 129.7 (2C), 128.5 (2C), 118.1 (1C), 74.1 (1C), 71.1 (1C), 38.7 (1C), 36.2 (1C), 21.9 (1C), 19.4 (1C); HRMS (ESI)  $m/z$ : [M+Na]<sup>+</sup> Calcd for C<sub>15</sub>H<sub>20</sub>O<sub>3</sub>Na 271.1304, Found 271.1304.

(*S*)-2,2-dimethyl-1-((triethylsilyloxy)hex-5-en-3-ol (**4d**)

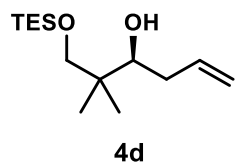

Purification with column chromatography on silica gel (Hexane/EtOAc = 1/0 to 10/1); quantitative yield (56.2 mg); colorless oil;  $[\alpha]_D^{25.7}$ : -10.4 ( $c = 0.100$ , CHCl<sub>3</sub>);  $R_f = 0.39$  (Hexane/EtOAc = 10/1); <sup>1</sup>H NMR (600 MHz, CDCl<sub>3</sub>)  $\delta$  5.98-5.92 (m, 1H), 5.13-5.07 (m, 2H), 3.55 (dd,  $J = 10.3, 2.4$  Hz, 1H), 3.50 (d,  $J = 9.6$  Hz, 1H), 3.48 (d,  $J = 9.6$  Hz, 1H), 2.29-2.25 (m, 1H), 2.13-2.08 (m, 1H), 0.96 (t,  $J = 7.8$  Hz, 9H), 0.92 (s, 3H), 0.84 (s, 3H), 0.61 (q,  $J = 7.8$  Hz, 6H); <sup>13</sup>C NMR (151 MHz, CDCl<sub>3</sub>)  $\delta$  137.0 (1C), 116.4 (1C), 78.6 (1C), 73.2 (1C), 38.4 (1C), 36.8 (1C), 22.4 (1C), 18.9 (1C), 6.8 (3C), 4.2 (3C); HRMS (ESI)  $m/z$ : [M+Na]<sup>+</sup> Calcd for C<sub>14</sub>H<sub>30</sub>O<sub>2</sub>SiNa 281.1913, Found 281.1907.

Enantiomeric excess of **4d** was determined by HPLC analysis of benzoate derivative **S17** according to the below scheme.

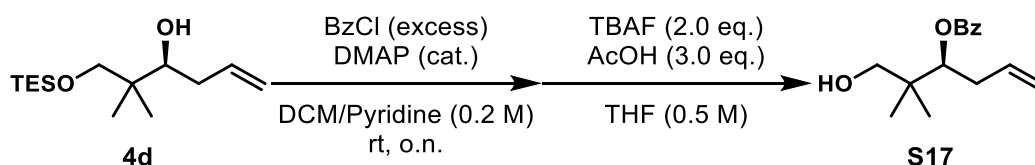

HPLC analysis: Chiralcel AD-3 column (Hexane/<sup>i</sup>PrOH = 95/5, 1.0 mL/min, 30 °C, 254 nm),  $t_R$  major = 10.367 min,  $t_R$  minor = 11.283 min; 92% ee

(*S*)-3-hydroxy-2,2-dimethylhex-5-en-1-yl 4-methylbenzenesulfonate (**4e**)

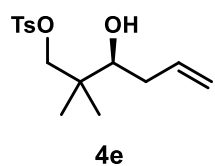

Purification with column chromatography on silica gel (Hexane/EtOAc = 20/1 to 5/1); 75% yield (44.5 mg); colorless oil;  $[\alpha]_D^{27.1}$ : -3.14 ( $c = 0.285$ , CHCl<sub>3</sub>);  $R_f = 0.35$  (Hexane/EtOAc = 5/1); HPLC analysis: Chiralcel AD-3 column (Hexane/<sup>i</sup>PrOH = 98/2, 0.7 mL/min, 30 °C, 254 nm),  $t_R$  major = 11.000 min,  $t_R$  minor = 10.400 min; 90% ee; <sup>1</sup>H NMR (600 MHz, CDCl<sub>3</sub>)  $\delta$  7.79 (d,  $J = 8.2$  Hz, 2H), 7.35 (d,  $J = 8.2$  Hz, 2H), 5.83-5.76 (m, 1H), 5.15-5.11 (m, 2H), 4.01 (d,  $J = 9.3$  Hz, 1H),



3.73 (d,  $J = 9.3$  Hz, 1H), 3.47 (d,  $J = 10.7$  Hz, 1H), 2.45 (s, 3H), 2.28 (dd,  $J = 14.1, 5.5$  Hz, 1H), 2.00-1.95 (m, 1H), 1.76 (s, 1H), 0.92 (s, 3H), 0.86 (s, 3H);  $^{13}\text{C}$  NMR (151 MHz,  $\text{CDCl}_3$ )  $\delta$  144.8 (1C), 135.7 (1C), 133.0 (1C), 129.9 (2C), 128.0 (2C), 118.5 (1C), 76.4 (1C), 73.1 (1C), 38.6 (1C), 36.0 (1C), 21.7 (1C), 21.5 (1C), 18.5 (1C); HRMS (ESI)  $m/z$ :  $[\text{M}+\text{Na}]^+$  Calcd for  $\text{C}_{15}\text{H}_{22}\text{O}_4\text{SNa}$  321.1131, Found 321.1131.

ethyl (*S,E*)-5-hydroxy-4,4-dimethylocta-2,7-dienoate (**4f**)

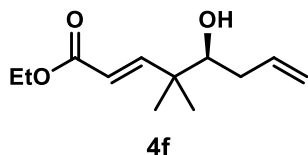

Purification with column chromatography on silica gel (Hexane/EtOAc = 20/1 to 5/1); quantitative yield (47.0 mg); colorless oil;  $[\alpha]_{\text{D}}^{25.1}$ : +6.06 ( $c = 0.165$ ,  $\text{CHCl}_3$ );  $R_f = 0.35$  (Hexane/EtOAc = 5/1); HPLC analysis: Chiralcel OD-3 column (Hexane/ $i$ PrOH = 95/5, 1.0 mL/min, 30 °C, 254 nm),  $t_R$  major = 6.833 min,  $t_R$  minor = 5.533 min; 95% ee;  $^1\text{H}$

NMR (600 MHz,  $\text{CDCl}_3$ )  $\delta$  7.03 (d,  $J = 15.8$  Hz, 1H), 5.85-5.78 (m, 2H), 5.16-5.14 (m, 2H), 4.20 (q,  $J = 7.2$  Hz, 2H), 3.43 (d,  $J = 9.6$  Hz, 1H), 2.33 (dd,  $J = 13.7, 4.8$  Hz, 1H), 2.00-1.95 (m, 1H), 1.69 (s, 1H), 1.30 (t,  $J = 7.2$  Hz, 3H), 1.11 (s, 3H), 1.11 (s, 3H);  $^{13}\text{C}$  NMR (151 MHz,  $\text{CDCl}_3$ )  $\delta$  167.0 (1C), 155.0 (1C), 135.6 (1C), 119.7 (1C), 118.5 (1C), 76.7 (1C), 60.4 (1C), 41.5 (1C), 37.0 (1C), 23.0 (1C), 22.5, (1C) 14.4 (1C); HRMS (ESI)  $m/z$ :  $[\text{M}+\text{Na}]^+$  Calcd for  $\text{C}_{12}\text{H}_{20}\text{O}_3\text{Na}$  235.1304, Found 235.1305.

(*R,E*)-6-hydroxy-5,5-dimethylnona-3,8-dien-2-one (**4g**)

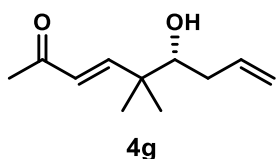

Purification with column chromatography on silica gel (Hexane/EtOAc = 20/1 to 5/1); 81% yield (46.9 mg); colorless oil;  $[\alpha]_{\text{D}}^{26.7}$ : +27.2 ( $c = 0.13$ ,  $\text{CHCl}_3$ );  $R_f = 0.21$  (Hexane/EtOAc = 5/1); HPLC analysis: Chiralcel OD-3 column (Hexane/ $i$ PrOH = 95/5, 1.0 mL/min, 30 °C, 254 nm),  $t_R$  major = 6.292 min,  $t_R$  minor = 6.925 min; 95% ee;  $^1\text{H}$

NMR (600 MHz,  $\text{CDCl}_3$ )  $\delta$  6.89 (d,  $J = 16.5$  Hz, 1H), 6.08 (d,  $J = 16.2$  Hz, 1H), 5.85-5.78 (m, 1H), 5.18-5.14 (m, 2H), 3.44 (d,  $J = 10.3$  Hz, 1H), 2.33 (m, 1H), 2.28 (s, 3H), 1.99-1.94 (m, 1H), 1.75 (s, 1H), 1.12 (s, 3H), 1.10 (s, 3H);  $^{13}\text{C}$  NMR (151 MHz,  $\text{CDCl}_3$ )  $\delta$  199.0 (1C), 154.1 (1C), 135.5 (1C), 129.0 (1C), 118.7 (1C), 76.7 (1C), 41.4 (1C), 37.1 (1C), 27.3 (1C), 23.0 (1C), 22.8 (1C); HRMS (ESI)  $m/z$ :  $[\text{M}+\text{Na}]^+$  Calcd for  $\text{C}_{11}\text{H}_{18}\text{O}_2\text{Na}$  205.1199, Found 205.1199.

(*S*)-1-cyclohexylbut-3-en-1-ol (**4h**)

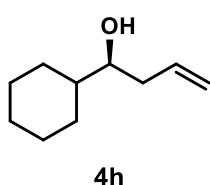

Purification with column chromatography on silica gel (Hexane/EtOAc = 30/1 to 10/1); 91% yield (27.8 mg); colorless oil;  $[\alpha]_{\text{D}}^{23.5}$ : -1.48 ( $c = 0.12$ ,  $\text{CHCl}_3$ );  $R_f = 0.28$  (Hexane/EtOAc = 10/1);  $^1\text{H}$  NMR (600 MHz,  $\text{CDCl}_3$ )  $\delta$  5.88-5.81 (m, 1H), 5.16-5.13 (m, 2H), 3.41-3.38 (m, 1H), 2.32-2.36 (m, 1H), 2.16-2.10 (m, 1H), 1.85-1.88 (m, 1H), 1.79-1.73 (m, 2H), 1.70-1.65 (m, 2H), 1.39-1.33 (m, 1H), 1.28-1.19 (m, 2H), 1.13-1.18 (m, 1H), 0.99-1.10 (m, 2H);  $^{13}\text{C}$  NMR (151

MHz,  $\text{CDCl}_3$ )  $\delta$  135.6 (1C), 118.1 (1C), 77.3 (1C), 77.1 (1C), 76.9 (1C), 74.8 (1C), 43.2 (1C), 38.9 (1C), 29.2 (1C), 28.2 (1C), 26.6 (1C), 26.4 (1C), 26.2 (1C).

All spectroscopic data for **4h** was known.<sup>[16]</sup>

Enantiomeric excess of **4h** was determined by HPLC analysis of benzoate derivative **S18** according to the below scheme.

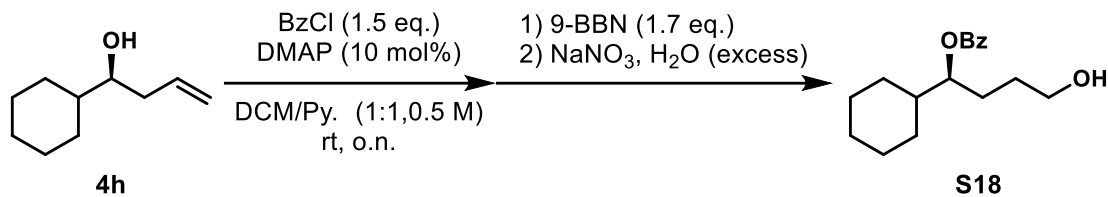

HPLC analysis: Chiralcel AD-3 column (Hexane/*i*PrOH = 97/3, 1.0 mL/min, 30 °C, 254 nm), *t*R major = 25.650 min, *t*R minor = 24.242 min; 89% ee

*(R)*-1-phenylbut-3-en-1-ol (**4i**)

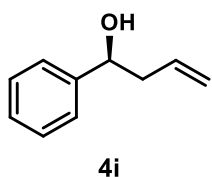

Purification with column chromatography on silica gel (Hexane/EtOAc = 20/1 to 10/1); 90% yield (27.8 mg); colorless oil;  $[\alpha]_D^{26.4}$ : +28.4 (*c* = 0.08, CHCl<sub>3</sub>); *R*<sub>f</sub> = 0.19 (Hexane/EtOAc = 5/1); HPLC analysis: Chiralcel OD-3 column (Hexane/*i*PrOH = 98/2, 0.7 mL/min, 30 °C, 254 nm), *t*R major = 21.500 min, *t*R minor = 18.542 min; 90% ee; <sup>1</sup>H NMR (600 MHz, CDCl<sub>3</sub>) δ 7.39-7.33 (m, 4H), 7.30-7.26 (m, 1H), 5.85-5.78 (m, 1H), 5.19-5.14 (m, 2H), 4.75 (d, *J* = 7.8, 4.8, 2.4 Hz, 1H), 2.57-2.47 (m, 2H), 2.03 (brs, 1H); <sup>13</sup>C NMR (151 MHz, CDCl<sub>3</sub>) δ 144.1 (1C), 134.6 (1C), 128.5 (2C), 127.6 (1C), 126.0 (2C), 118.4 (1C), 73.5 (1C), 43.9 (1C).

All spectroscopic data for **4i** was known.<sup>[16]</sup>

*(R)*-1-phenylhex-5-en-3-ol (**4j**)

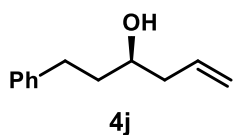

Purification with column chromatography on silica gel (Hexane/EtOAc = 10/1 to 3/1); 85% yield (30.1 mg); colorless oil;  $[\alpha]_D^{24.8}$ : +9.72 (*c* = 0.200, CHCl<sub>3</sub>); *R*<sub>f</sub> = 0.18 (Hexane/EtOAc = 3/1); HPLC analysis: Chiralcel OD-3 column (Hexane/*i*PrOH = 95/5, 1.0 mL/min, 30 °C, 254 nm), *t*R major = 6.292 min, *t*R minor = 6.925 min; 95% ee; <sup>1</sup>H NMR (600 MHz, CDCl<sub>3</sub>) δ 7.29 (t, *J* = 7.7 Hz, 2H), 7.20 (dd, *J* = 16.0, 7.4 Hz, 3H), 5.85-5.79 (m, 1H), 5.16-5.14 (m, 2H), 3.68 (s, 1H), 2.81 (ddd, *J* = 14.4, 9.0, 6.0 Hz, 1H), 2.67-2.72 (m, 1H), 2.35-2.31 (m, 1H), 2.21-2.16 (m, 1H), 1.83-1.76 (m, 2H), 1.57 (d, *J* = 4.1 Hz, 1H); <sup>13</sup>C NMR (151 MHz, CDCl<sub>3</sub>) δ 142.1 (1C), 134.7 (1C), 128.5 (2C), 128.5 (2C), 125.9 (1C), 118.5 (1C), 77.3 (1C), 77.1 (1C), 76.9 (1C), 70.0 (1C), 42.2 (1C), 38.5 (1C), 32.1 (1C).

All spectroscopic data for **4j** was known.<sup>[16]</sup>

*(S)*-9-(benzyloxy)non-1-en-4-ol (**4k**)

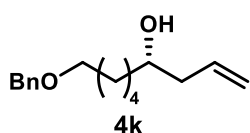

Purification with column chromatography on silica gel (Hexane/EtOAc = 20/1 to 10/1); 96% yield (47.7 mg); colorless oil;  $[\alpha]_D^{25}$ : -7.96 (*c* = 0.300, CHCl<sub>3</sub>); *R*<sub>f</sub> = 0.29 (Hexane/EtOAc = 5/1); SFC analysis: Chiralpak IF-3/SFC 4.6×150 mm (CO<sub>2</sub>/MeOH = 95/5, 3.0 mL/min, 220 nm, 40 °C), *t*R major = 5.978 min, *t*R minor = 5.523 min; 95% ee; <sup>1</sup>H NMR (600 MHz, CDCl<sub>3</sub>) δ 7.35-7.27 (m, 5H), 5.86-5.79 (m, 1H), 5.15-5.11 (m, 2H), 4.50 (s, 2H), 3.66-3.62 (m, 1H), 3.47 (t, *J* = 6.5 Hz, 2H), 2.32-2.27 (m, 1H), 2.17-2.11 (m, 1H), 1.66-1.33 (m, 8H); <sup>13</sup>C NMR (151 MHz, CDCl<sub>3</sub>) δ 138.6 (1C), 134.9 (1C), 128.4 (2C), 127.7 (2C), 127.5 (1C), 118.2 (1C), 77.2 (1C), 77.0 (1C), 76.8 (1C), 72.9 (1C), 70.6 (1C), 70.3

(1C), 42.0 (1C), 36.7 (1C), 29.7 (1C), 26.2 (1C), 25.5 (1C); HRMS (FD)  $m/z$ :  $[M+Na]^+$  Calcd for  $C_{16}H_{24}NaO_2$  271.1668; Found 271.1668.

(2*S*,3*R*)-1-((4-methoxybenzyl)oxy)-2-methylhex-5-en-3-ol (**4l**)

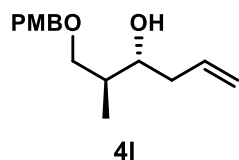

Purification with column chromatography on silica gel (Hexane/EtOAc = 20/1 to 5/1); 95% yield (47.8 mg); colorless oil;  $[\alpha]_D^{26.4}$ : +1.96 ( $c = 0.100$ ,  $CHCl_3$ );  $R_f = 0.16$  (Hexane/EtOAc = 5/1);  $^1H$  NMR (600 MHz,  $CDCl_3$ )  $\delta$  7.25 (d,  $J = 8.6$  Hz, 2H), 6.88 (d,  $J = 8.6$  Hz, 2H), 5.87-5.80 (m, 1H), 5.13-5.07 (m, 2H), 4.44 (s, 2H), 3.83-3.79 (m, 4H), 3.50 (d,  $J = 5.5$  Hz, 2H), 2.57 (brs, 1H), 2.26-2.17 (m, 2H), 1.92-1.86 (m, 1H), 0.95 (d,  $J = 7.2$  Hz, 3H);  $^{13}C$  NMR (151 MHz,  $CDCl_3$ )  $\delta$  159.3 (1C), 135.7 (1C), 130.2 (1C), 129.3 (2C), 117.3 (1C), 113.9 (2C), 74.4 (1C), 73.2 (1C), 73.1 (1C), 55.4 (1C), 38.9 (1C), 37.5 (1C), 10.8 (1C); HRMS (ESI)  $m/z$ :  $[M+Na]^+$  Calcd for  $C_{15}H_{22}O_3Na$  273.1467, Found 273.1461.

(2*S*,3*S*)-1-((4-methoxybenzyl)oxy)-2-methylhex-5-en-3-ol (**4m**)

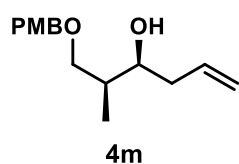

Purification with column chromatography on silica gel (Hexane/EtOAc = 20/1 to 5/1); 94% yield (47.2 mg); colorless oil;  $[\alpha]_D^{27.2}$ : -5.63 ( $c = 0.12$ ,  $CHCl_3$ );  $R_f = 0.25$  (Hexane/EtOAc = 5/1);  $^1H$  NMR (600 MHz,  $CDCl_3$ )  $\delta$  7.24 (d,  $J = 8.2$  Hz, 2H), 6.87 (d,  $J = 8.6$  Hz, 2H), 5.93-5.86 (m, 1H), 5.12-5.09 (m, 2H), 4.45 (s, 2H), 3.80 (s, 3H), 3.60-3.56 (m, 2H), 3.46 (dd,  $J = 9.3$ , 7.2 Hz, 1H), 3.45 (brs, 1H), 2.36-2.32 (m, 1H), 2.21-2.15 (m, 1H), 1.90-1.84 (m, 1H), 0.90 (d,  $J = 6.9$  Hz, 3H);  $^{13}C$  NMR (151 MHz,  $CDCl_3$ )  $\delta$  159.4 (1C), 135.3 (1C), 130.0 (1C), 129.4 (2C), 117.3 (1C), 113.9 (2C), 75.2 (1C), 74.6 (1C), 73.2 (1C), 55.4 (1C), 39.5 (1C), 37.9 (1C), 13.9 (1C).

All spectroscopic data for **4m** was known.<sup>[17]</sup>

(4*S*,6*R*)-6-((4-methoxybenzyl)oxy)hept-1-en-4-ol (**4n**)

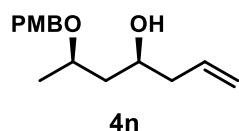

Purification with column chromatography on silica gel (Hexane/EtOAc = 10/1 to 3/1); 90% yield (45.3 mg); colorless oil;  $[\alpha]_D^{24.6}$ : -25.7 ( $c = 0.200$ ,  $CHCl_3$ );  $R_f = 0.30$  (Hexane/EtOAc = 3/1);  $^1H$  NMR (600 MHz,  $CDCl_3$ )  $\delta$  7.25 (d,  $J = 8.4$  Hz, 2H), 6.87 (d,  $J = 9.0$  Hz, 2H), 5.82 (m, 1H), 5.11-5.06 (m, 2H), 4.60 (d,  $J = 10.8$  Hz, 1H), 4.35 (d,  $J = 10.8$  Hz, 1H), 3.86-3.80 (m, 5H), 3.77 (s, 1H), 2.25-2.15 (m, 2H), 1.68-1.58 (m, 2H), 1.24 (d,  $J = 6.0$  Hz, 3H);  $^{13}C$  NMR (151 MHz,  $CDCl_3$ )  $\delta$  159.4 (1C), 135.1 (1C), 130.1 (1C), 129.5 (2C), 117.3 (1C), 114.0 (2C), 75.8 (1C), 71.2 (1C), 70.1 (1C), 55.4 (1C), 43.2 (1C), 42.1 (1C), 19.7 (1C); HRMS (ESI)  $m/z$ :  $[M+Na]^+$  Calcd for  $C_{15}H_{22}O_3Na$  273.1467, Found 273.1461.

(4*R*,6*R*)-6-((4-methoxybenzyl)oxy)hept-1-en-4-ol (**4o**)

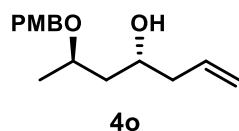

Purification with column chromatography on silica gel (Hexane/EtOAc = 10/1 to 3/1); 89% yield (44.6 mg); colorless oil;  $[\alpha]_D^{25.3}$ : -24.8 ( $c = 0.165$ ,  $CHCl_3$ );  $R_f = 0.39$  (Hexane/EtOAc = 3/1);  $^1H$  NMR (600 MHz,  $CDCl_3$ )  $\delta$  7.26 (d,  $J = 9.0$  Hz, 2H), 6.87 (d,  $J = 9.0$  Hz, 2H), 5.86-5.79 (m, 1H), 5.11-5.06 (m, 2H), 4.55 (d,  $J = 11.4$  Hz, 1H), 4.39 (d,  $J = 11.4$  Hz, 1H), 3.99-3.95 (m, 1H), 3.89-3.83 (m, 1H), 3.80 (s, 3H), 2.24-2.17 (m, 2H), 1.68-1.58 (m, 2H), 1.24 (t,  $J = 5.7$  Hz, 3H);  $^{13}C$  NMR (151 MHz,  $CDCl_3$ )

$\delta$  159.3 (1C), 135.2 (1C), 130.6 (1C), 129.5 (2C), 117.5 (1C), 114.0 (2C), 72.3 (1C), 70.3 (1C), 67.8 (1C), 55.4 (1C), 42.4 (1C), 42.1 (1C), 19.4 (1C); HRMS (ESI)  $m/z$ :  $[M+Na]^+$  Calcd for  $C_{15}H_{22}O_3Na$  273.1467, Found 273.1461.

(2*S*,3*R*,4*R*)-1-((4-methoxybenzyl)oxy)-2,4-dimethylhex-5-en-3-ol (**4p**)

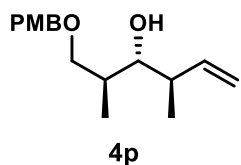

Purification with column chromatography on silica gel (Hexane/EtOAc = 20/1 to 5/1); 85% yield (48.8 mg); colorless oil;  $[\alpha]_D^{27.1}$ : -2.77 ( $c = 0.12$ ,  $CHCl_3$ );  $R_f = 0.60$  (Hexane/EtOAc = 5/1);  $^1H$  NMR (600 MHz,  $CDCl_3$ )  $\delta$  7.16 (d,  $J = 8.6$  Hz, 2H), 6.79 (d,  $J = 8.6$  Hz, 2H), 5.85-5.79 (m, 1H), 4.99-4.96 (m, 2H), 4.36 (s, 2H), 3.72 (s, 3H), 3.47 (dd,  $J = 9.0, 4.2$  Hz, 1H),

3.40 (t,  $J = 8.4$  Hz, 2H), 3.28 (dd,  $J = 7.2, 3.6$  Hz, 1H), 2.28-2.24 (m, 1H), 1.85-1.81 (m, 1H), 1.02 (d,  $J = 6.9$  Hz, 3H), 0.79 (d,  $J = 6.9$  Hz, 3H);  $^{13}C$  NMR (151 MHz,  $CDCl_3$ )  $\delta$  159.4 (1C), 139.9 (1C), 129.9 (1C), 129.4 (2C), 115.2 (1C), 113.9 (2C), 79.9 (1C), 75.3 (1C), 73.2 (1C), 55.4 (1C), 41.2 (1C), 36.3 (1C), 17.8 (1C), 14.0 (1C); HRMS (ESI)  $m/z$ :  $[M+Na]^+$  Calcd for  $C_{16}H_{24}O_3Na$  287.1623, Found 287.1618.

(2*S*,3*S*,4*S*)-1-((4-methoxybenzyl)oxy)-2,4-dimethylhex-5-en-3-ol (**4q**)

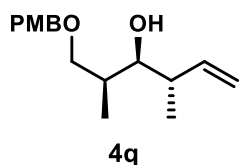

Purification with column chromatography on silica gel (Hexane/EtOAc = 20/1 to 5/1); 70% yield (37.3 mg); colorless oil;  $[\alpha]_D^{24.4}$ : +2.77 ( $c = 0.24$ ,  $CHCl_3$ );  $R_f = 0.54$  (Hexane/EtOAc = 5/1);  $^1H$  NMR (600 MHz,  $CDCl_3$ )  $\delta$  7.25 (d,  $J = 8.6$  Hz, 2H), 6.87 (d,  $J = 8.6$  Hz, 2H), 5.82-5.76 (m, 1H), 5.12-5.08 (m, 2H), 4.44 (s, 2H), 3.80 (s, 3H), 3.53 (dd,  $J = 8.9, 6.2$  Hz, 1H),

3.50-3.46 (m, 2H), 2.33 (brs, 1H), 2.26 (td,  $J = 15.1, 7.2$  Hz, 1H), 1.97-1.93 (m, 1H), 0.95 (t,  $J = 7.6$  Hz, 6H);  $^{13}C$  NMR (151 MHz,  $CDCl_3$ )  $\delta$  159.2 (1C), 142.0 (1C), 130.5 (1C), 129.3 (2C), 115.7 (1C), 113.9 (2C), 75.8 (1C), 74.6 (1C), 73.1 (1C), 55.4 (1C), 42.0 (1C), 35.0 (1C), 16.7 (1C), 9.9 (1C).

All spectroscopic data for **4q** was known.<sup>[18]</sup>

(3*S*,4*R*,6*R*)-6-((4-methoxybenzyl)oxy)-3-methylhept-1-en-4-ol (**4r**)

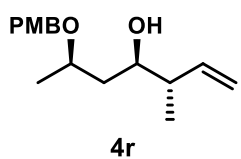

Purification with column chromatography on silica gel (Hexane/EtOAc = 20/1 to 3/1); 72% yield (38.0 mg); colorless oil;  $[\alpha]_D^{24.4}$ : +2.77 ( $c = 0.24$ ,  $CHCl_3$ );  $R_f = 0.37$  (Hexane/EtOAc = 3/1);  $^1H$  NMR (600 MHz,  $CDCl_3$ )  $\delta$  7.26 (d,  $J = 8.9$  Hz, 3H), 6.87 (d,  $J = 8.6$  Hz, 2H), 5.84-5.78 (m, 1H), 5.06-5.02 (m, 2H), 4.59 (d,  $J = 10.8$  Hz, 1H), 4.36 (d,  $J = 10.8$  Hz, 1H), 3.81-

3.77 (m, 4H), 3.70-3.68 (m, 1H), 2.24-2.20 (m, 1H), 1.66-1.57 (m, 3H), 1.24 (d,  $J = 5.4$  Hz, 3H), 1.03 (d,  $J = 7.2$  Hz, 3H);  $^{13}C$  NMR (151 MHz,  $CDCl_3$ )  $\delta$  159.3 (1C), 140.7 (1C), 130.2 (1C), 129.6 (2C), 115.1 (1C), 114.0 (2C), 76.1 (1C), 75.0 (1C), 70.1 (1C), 55.4 (1C), 43.9 (1C), 40.6 (1C), 19.8 (1C), 15.5 (1C).

All spectroscopic data for **4r** was known.<sup>[11]</sup>

(3*R*,4*S*,6*R*)-6-((4-methoxybenzyl)oxy)-3-methylhept-1-en-4-ol (**4s**)

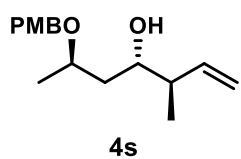

Purification with column chromatography on silica gel (Hexane/EtOAc = 20/1 to 3/1); 80% yield (45.9 mg); colorless oil;  $[\alpha]_D^{24.8}$ : -35.8 ( $c = 0.13$ ,  $CHCl_3$ );  $R_f = 0.37$  (Hexane/EtOAc = 5/1);  $^1H$  NMR (600 MHz,  $CDCl_3$ )  $\delta$  7.26 (d,  $J = 8.2$  Hz, 2H), 6.87 (d,  $J = 8.6$  Hz, 2H), 5.84-5.78 (m, 1H), 5.08-5.05 (m, 2H), 4.54 (d,  $J = 11.3$  Hz, 1H), 4.39 (d,  $J = 11.0$  Hz, 1H), 3.88-

3.83 (m, 1H), 3.80-3.75 (m, 4H), 2.15-2.23 (m, 1H), 1.65-1.56 (m, 2H), 1.24 (d,  $J = 6.2$  Hz, 3H), 1.02 (d,  $J = 7.2$  Hz, 3H);  $^{13}\text{C}$  NMR (151 MHz,  $\text{CDCl}_3$ )  $\delta$  159.2 (1C), 140.8 (1C), 130.7 (1C), 129.4 (2C), 115.5 (1C), 113.9 (2C), 72.3 (1C), 71.3 (1C), 70.4 (1C), 55.4 (1C), 44.2 (1C), 40.3 (1C), 19.4 (1C), 16.2 (1C); HRMS (ESI)  $m/z$ :  $[\text{M}+\text{Na}]^+$  Calcd for  $\text{C}_{16}\text{H}_{24}\text{O}_3\text{Na}$  287.1623, Found 287.1618.

(1*S*,2*S*)-2-methyl-1-phenylbut-3-en-1-ol (**4t**)

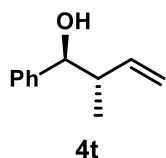

Purification with column chromatography on silica gel (Hexane/EtOAc = 20/1 to 5/1); 98% yield (31.2 mg); colorless oil;  $[\alpha]_{\text{D}}^{24.6}$ : -122.7 ( $c = 0.200$ ,  $\text{CHCl}_3$ );  $R_f = 0.38$  (Hexane/EtOAc = 5/1); HPLC analysis: Chiralcel OD-3 column (Hexane/ $i$ PrOH = 90/10, 1.0 mL/min, 30 °C, 254 nm), tR major = 7.917 min, tR minor = 9.150 min; 96% ee;  $^1\text{H}$  NMR (600 MHz,  $\text{CDCl}_3$ )  $\delta$  7.37-7.27 (m, 5H), 5.84-5.78 (m, 1H), 5.23-5.18 (m, 2H), 4.36 (d,  $J = 7.8$  Hz, 1H), 2.52-2.45 (m, 1H), 2.14 (s, 1H), 0.87 (d,  $J = 6.6$  Hz, 3H);  $^{13}\text{C}$  NMR (151 MHz,  $\text{CDCl}_3$ )  $\delta$  142.5 (1C), 140.7 (1C), 128.3 (2C), 127.8 (1C), 126.9 (2C), 117.0 (1C), 77.9 (1C), 46.4 (1C), 16.6 (1C).

All spectroscopic data for **4t** was known.<sup>[19]</sup>

(3*R*,4*S*)-4-methyl-1-phenylhex-5-en-3-ol (**4u**)

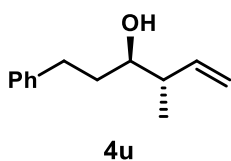

Purification with column chromatography on silica gel (Hexane/EtOAc = 20/1 to 5/1); 85% yield (32.2 mg); colorless oil;  $[\alpha]_{\text{D}}^{24.9}$ : +13.8 ( $c = 0.25$ ,  $\text{CHCl}_3$ );  $R_f = 0.35$  (Hexane/EtOAc = 5/1); HPLC analysis: Chiralcel OD-3 column (Hexane/ $i$ PrOH = 95/5, 1.0 mL/min, 30 °C, 254 nm), tR major = 12.208 min, tR minor = 7.958 min; 93% ee  $^1\text{H}$  NMR (600 MHz,  $\text{CDCl}_3$ )  $\delta$  7.30-7.18 (m, 5H), 5.77-5.71 (m, 1H), 5.14-5.08 (m, 2H), 3.42 (ddd,  $J = 8.4, 6.0, 3.0$  Hz, 1H), 2.85 (ddd,  $J = 13.2, 10.2, 5.4$ , Hz, 1H), 2.67 (ddd,  $J = 13.8, 10.2, 6.6$  Hz, 1H), 2.22 (q,  $J = 7.1$  Hz, 1H), 1.87-1.81 (m, 1H), 1.70 (dddd,  $J = 14.4, 9.6, 9.6, 5.4$  Hz, 1H), 1.60 (s, 1H), 1.03 (d,  $J = 6.9$  Hz, 3H);  $^{13}\text{C}$  NMR (151 MHz,  $\text{CDCl}_3$ )  $\delta$  142.4 (1C), 140.3 (1C), 128.6 (2C), 128.5 (2C), 125.9 (1C), 116.7 (1C), 74.1 (1C), 44.5 (1C), 36.2 (1C), 32.2 (1C), 16.3 (1C).

All spectroscopic data for **4u** was known.<sup>[19]</sup>

## 5. Derivatization of Products

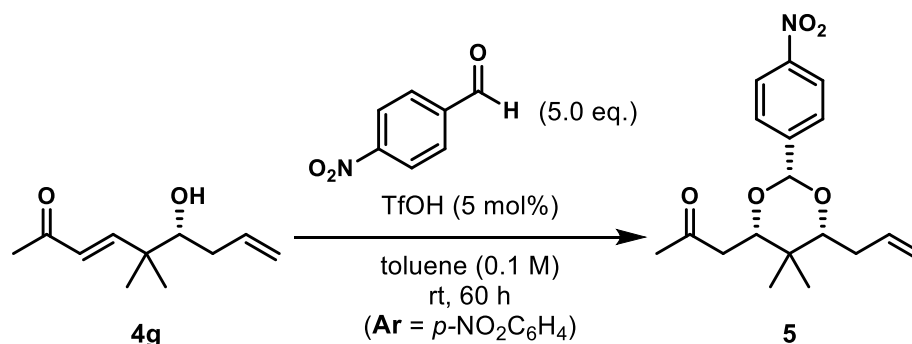

To a solution of **4g** (91.1 mg, 0.5 mmol, 1.0 eq.) and *p*-nitrobenzaldehyde (377.8 mg, 2.5 mmol, 5.0 eq.) in toluene (4.9 mL, 0.1 M overall) was added TfOH (0.5 M in toluene, 100  $\mu\text{L}$ , 10 mol%) at room temperature. The reaction was stirred until TLC showed complete conversion of starting material. The reaction was cooled to 0 °C, quenched

with Et<sub>3</sub>N (100 μL), and then concentrated in vacuo. The residue was purified by flash column chromatography on silica gel (Hexane/EtOAc = 20/1 to 1/1) to give **5** (144.7 mg, 0.43 mmol) in 87% yield as a colorless oil.

R<sub>f</sub> = 0.51 (Hexane/EtOAc = 3/1).

[α]<sub>D</sub><sup>25.2</sup>: +6.20 (c = 0.100, CHCl<sub>3</sub>).

<sup>1</sup>H NMR (600 MHz, CDCl<sub>3</sub>) δ 8.20 (d, *J* = 8.9 Hz, 2H), 7.62 (d, *J* = 8.6 Hz, 2H), 5.96-5.89 (m, 1H), 5.65 (s, 1H), 5.15-5.08 (m, 2H), 4.13 (dd, *J* = 9.6, 1.7 Hz, 1H), 3.59 (dd, *J* = 9.6, 2.7 Hz, 1H), 2.75 (dd, *J* = 16.2, 10.0 Hz, 1H), 2.50 (dd, *J* = 16.2, 1.7 Hz, 1H), 2.35-2.23 (m, 5H), 0.99 (s, 3H), 0.84 (s, 3H).

<sup>13</sup>C NMR (151 MHz, CDCl<sub>3</sub>) δ 206.8 (1C), 148.1 (1C), 145.1 (1C), 135.6 (1C), 127.2 (2C), 123.4 (2C), 116.8 (1C), 99.6 (1C), 85.9 (1C), 81.9 (1C), 43.2 (1C), 35.5 (1C), 33.7 (1C), 31.5 (1C), 20.8 (1C), 14.2 (1C).

HRMS (ESI) *m/z*: [M+Na]<sup>+</sup> Calcd for C<sub>18</sub>H<sub>23</sub>NO<sub>5</sub>Na 356.1468, Found 356.1468.

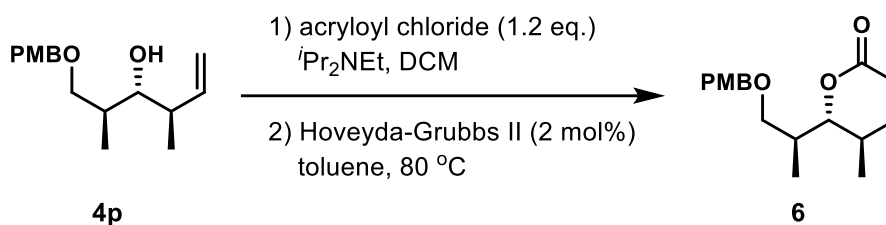

To a solution of **4p** (86.1 mg, 0.3 mmol, 1.0 eq.) and *i*Pr<sub>2</sub>NEt (76.5 μL, 0.45 mmol, 1.5 eq.) in DCM (0.6 mL, 0.2 M) was added acryloyl chloride (29.1 μL, 0.36 mmol, 1.2 eq.) at room temperature. The reaction was stirred until TLC showed complete conversion of starting material. The reaction was quenched with aq. NH<sub>4</sub>Cl. The aqueous phase was extracted with EtOAc, the organic layers were combined, dried over Na<sub>2</sub>SO<sub>4</sub>, filtered, and concentrated in *vacuo*. The crude material was used to the next reaction without further purification.

To a crude ester in toluene (3 mL, 0.1 M) was added Hoveyda-Grubbs II catalyst (3.8 mg, 2 mol%) and the mixture was heated to 80 °C. The reaction mixture was stirred for 12 h and the reaction mixture was concentrated in *vacuo*. The residue was purified by flash column chromatography on silica gel (Hexane/EtOAc=20/1 to 8/1) to give a lactone **6** in 91% yield (2 steps).

R<sub>f</sub> = 0.26 (Hexane/EtOAc = 3/1).

[α]<sub>D</sub><sup>25.8</sup>: +11.6 (c = 0.13, CHCl<sub>3</sub>).

<sup>1</sup>H NMR (600 MHz, CDCl<sub>3</sub>) δ 7.24-7.21 (m, 2H), 6.89-6.86 (m, 2H), 6.66 (dd, *J* = 10.2, 3.0 Hz, 1H), 5.94 (dd, *J* = 9.6, 2.4 Hz, 1H), 4.41 (s, 2H), 4.05 (dd, *J* = 9.3, 3.4 Hz, 1H), 3.81 (s, 3H), 3.67 (dd, *J* = 9.5, 6.6 Hz, 1H), 3.37 (dd, *J* = 9.6, 5.4 Hz, 1H), 2.89-2.83 (m, 1H), 2.25-2.19 (m, 1H), 1.15 (d, *J* = 7.2 Hz, 3H), 1.08 (d, *J* = 7.2 Hz, 3H).

<sup>13</sup>C NMR (151 MHz, CDCl<sub>3</sub>) δ 164.4 (1C), 159.2 (1C), 152.3 (2C), 130.5 (1C), 129.2 (1C), 119.8 (2C), 113.9 (1C), 86.3 (1C), 73.0 (1C), 70.7 (1C), 55.4 (1C), 35.0 (1C), 31.3 (1C), 16.8 (1C), 15.5 (1C).

HRMS (ESI) *m/z*: [M+Na]<sup>+</sup> Calcd for C<sub>17</sub>H<sub>22</sub>O<sub>4</sub>Na 313.1410, Found 313.1410.

## 6. References

1. T. Kuranaga, Y. Sesoko, K. Sakata, N. Maeda, A. Hayata, M. Inoue, *J. Am. Chem. Soc.* **2013**, *135*, 5467.
2. P.-L. Wang, H.-Z. Shen, H.-H. Cheng, H. Gao, P.-H. Li, *Green Chem.* **2020**, *22*, 6783.
3. Y. Watanabe, M. Kawamoto, H. Shintaku, K. Tanabe, H. Ohta, M. Hayashi, *Asian J. Org. Chem.* **2013**, *2*, 927.
4. Y. Yang, J. Wang, Margaret Kayser, *Tetrahedron: Asymmetry*, **2007**, *18*, 2021.
5. Y. Wang, J. Zhu, A. C. Durham, H. Lindberg, Y.-M. Wang, *J. Am. Chem. Soc.* **2019**, *141*, 19594.
6. S. R. Angle and M. L. Neitzel, *J. Org. Chem.* **1999**, *64*, 8754.
7. E. A. Couladouros and A. D. Magos, *Molecular Diversity*. **2005**, *9*, 99.
8. E. A. Couladouros and A. D. Magos, *Molecular Diversity*. **2005**, *9*, 99.
9. P. Mohan, K. Koushik, M. J. Fuertes, *Tetrahedron Lett.* **2012**, *53*, 2730.
10. A. Matsumoto, K. Asano, S. Matsubara, *Org. Lett.* **2019**, *21*, 2688.
11. S. Umemiya, N. Shinagawa, M. Terada, *Org. Lett.* **2023**, *25*, 1924.
12. J. Ding and A. B. Smith, *J. Am. Chem. Soc.* **2023**, *145*, 18240.
13. P. Zhang, I. A. Roundtree, J. P. Morken, *Org. Lett.* **2012**, *14*, 1416.
14. A. D. Wadsworth, D. P. Furkert, J. Sperry, M. A. Brimble, *Org. Lett.* **2012**, *14*, 5374.
15. I. S. Kim, M.-Y. Nagi, M. J. Krische, *J. Am. Chem. Soc.* **2008**, *130*, 14891.
16. C.-H. Xing, Y.-X. Liao, Y. Zhang, D. Sabarova, M. Bassous, Q.-S. Hu, *Eur. J. Org. Chem.* **2012**, *6*, 1115.
17. S. Specklin, G. Boissonnat, C. Lecourt, G. Sorin, M.-I. Lannou, J. Ardisson, F. Sautel, G. Massiot, C. Meyer, J. Cossy, *Org. Lett.* **2015**, *17*, 2446.
18. W.-H. Jung, C. Harrison, Y. Shin, J.-H. Fournier, R. Balachandran, B. S. Raccor, R. P. Sikorski, A. Vogt, D. P. Currana, B. W. Day, *J. Med. Chem.* **2007**, *50*, 2951.
19. S. Kobayashi, K. Nishino, *J. Org. Chem.* **1994**, *59*, 6620.

## 7. Optimization of allylboration of pivalaldehyde

Table S1. Optimization of reaction condition<sup>a</sup>

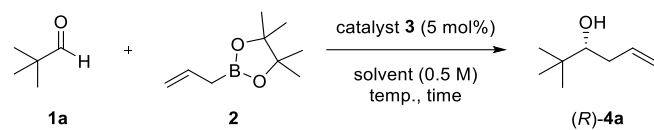

| Entry           | Catalyst                | Solvent           | Temp./ °C  | Time / h | Yield /% <sup>b</sup> | Ee / % |
|-----------------|-------------------------|-------------------|------------|----------|-----------------------|--------|
| 1               | ( <i>S</i> )- <b>3a</b> | toluene           | -75        | 24       | 90                    | 40     |
| 2               | ( <i>R</i> )- <b>3b</b> | toluene           | -75        | 24       | 80                    | 67     |
| 3               | ( <i>R</i> )- <b>3c</b> | toluene           | -75        | 24       | 38                    | 39     |
| 4               | ( <i>R</i> )- <b>3d</b> | toluene           | -75        | 72       | 98                    | 84     |
| 5               | ( <i>R</i> )- <b>3e</b> | toluene           | -75        | 24       | quant.                | 95     |
| 6               | ( <i>R</i> )- <b>3f</b> | toluene           | -75        | 72       | no reaction           | nd     |
| 7               | ( <i>R</i> )- <b>3g</b> | toluene           | -75        | 72       | no reaction           | nd     |
| 8               | ( <i>R</i> )- <b>3h</b> | toluene           | -75        | 72       | no reaction           | nd     |
| 9 <sup>c</sup>  | ( <i>R</i> )- <b>3d</b> | toluene           | -75        | 72       | quant.                | 95     |
| 10              | ( <i>R</i> )- <b>3i</b> | toluene           | -75        | 24       | 84                    | 93     |
| 11              | ( <i>R</i> )- <b>3j</b> | toluene           | -75        | 24       | 48                    | 21     |
| 12              | ( <i>R</i> )- <b>3k</b> | toluene           | -75        | 24       | no reaction           | nd     |
| 13              | ( <i>R</i> )- <b>3e</b> | Et <sub>2</sub> O | -75 to -40 | 48       | 92                    | 95     |
| 14              | ( <i>R</i> )- <b>3e</b> | THF               | -40        | 48       | no reaction           | nd     |
| 15              | ( <i>R</i> )- <b>3e</b> | MeCN              | -40        | 48       | trace                 | nd     |
| 16              | ( <i>R</i> )- <b>3e</b> | EtOAc             | -75 to -40 | 48       | quant.                | 89     |
| 17              | ( <i>R</i> )- <b>3e</b> | DCM               | -75        | 24       | quant.                | 78     |
| 18              | ( <i>R</i> )- <b>3e</b> | toluene           | -40        | 12       | quant.                | 93     |
| 19              | ( <i>R</i> )- <b>3e</b> | toluene           | 25         | <0.1     | quant.                | 87     |
| 20 <sup>d</sup> | ( <i>R</i> )- <b>3e</b> | toluene           | -75        | 48       | 83                    | 73     |



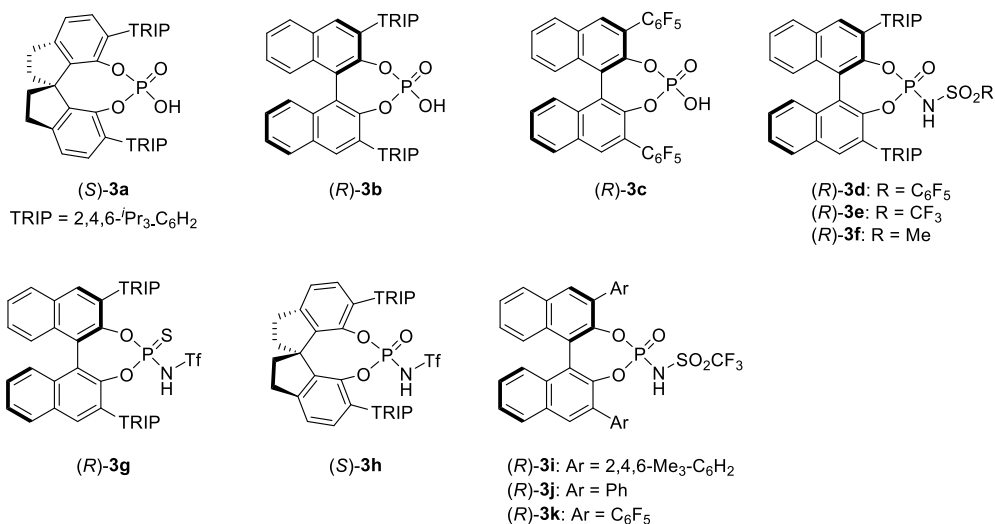

<sup>a</sup> Unless otherwise specified, all reactions were carried out using 0.20 mmol of **1a**, 0.24 mmol (1.2 eq.) of **2**, 0.010 mmol (5 mol%) of catalyst. <sup>b</sup> Isolated yield. <sup>c</sup> Catalyst loading was 0.5 mol% and 2 g of pivalaldehyde was employed. <sup>d</sup> In 2.5 M in toluene.

• Our attempt of Ir-catalyzed allylation reaction of neopentyl alcohol using BINAP ligand

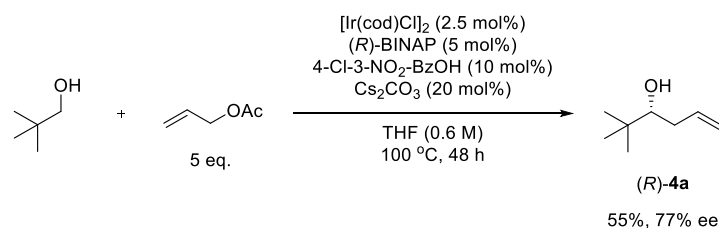

## 8. Comparison of enantioselectivities in substrate scope

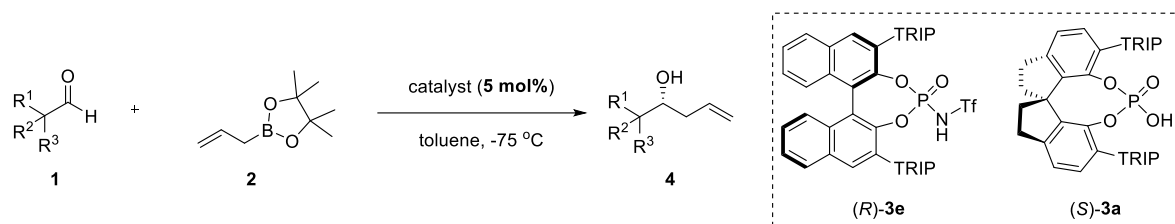

selected examples of the present allylboration

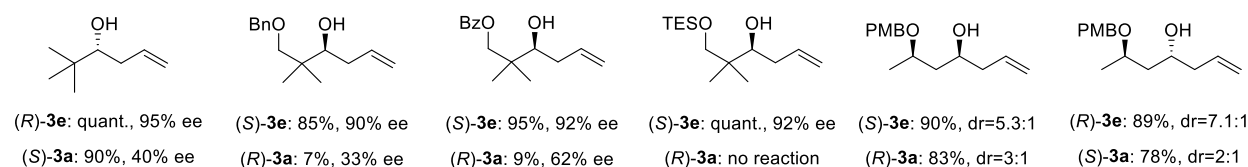

## 9. DFT calculation

### 9-1. Cartesian coordinates of intermediates and transition states

#### TS Re\_A (B3LYP)

B3LYP/6-31g(d); E(RB3LYP) = -4248.127703 hartree  
 Sum of electronic and thermal Free Energies= -4246.866565 hartree  
 Thermal correction to Gibbs Free Energy= 1.261139 hartree

| Center Number | Atomic Number | Atomic Type | Coordinates (Angstroms) |           |           |
|---------------|---------------|-------------|-------------------------|-----------|-----------|
|               |               |             | X                       | Y         | Z         |
| 1             | 6             | 0           | -0.927491               | 3.116483  | 0.236316  |
| 2             | 6             | 0           | -1.729254               | 1.995299  | 0.086061  |
| 3             | 6             | 0           | -3.125759               | 1.985767  | 0.387746  |
| 4             | 6             | 0           | -3.623880               | 3.086475  | 1.052211  |
| 5             | 1             | 0           | -4.686232               | 3.131698  | 1.272396  |
| 6             | 6             | 0           | 2.895917                | 3.608055  | -1.700412 |
| 7             | 6             | 0           | 0.370638                | 3.262114  | -0.487596 |
| 8             | 6             | 0           | 1.385620                | 2.329553  | -0.370042 |
| 9             | 6             | 0           | 2.682384                | 2.477570  | -0.937708 |
| 10            | 1             | 0           | 3.879289                | 3.769510  | -2.133250 |
| 11            | 8             | 0           | -1.222699               | 0.839159  | -0.515963 |
| 12            | 15            | 0           | 0.149205                | 0.055287  | -0.171095 |
| 13            | 8             | 0           | 1.143542                | 1.186982  | 0.413792  |
| 14            | 6             | 0           | -5.927703               | -0.985094 | -1.083864 |
| 15            | 6             | 0           | -5.178883               | -0.189714 | -1.952407 |
| 16            | 6             | 0           | -4.258432               | 0.762129  | -1.499632 |
| 17            | 6             | 0           | -4.053721               | 0.910845  | -0.103084 |
| 18            | 6             | 0           | -4.810714               | 0.121103  | 0.800791  |
| 19            | 6             | 0           | -5.725552               | -0.806497 | 0.286135  |
| 20            | 1             | 0           | -5.340531               | -0.295629 | -3.023046 |
| 21            | 1             | 0           | -6.310646               | -1.396833 | 0.985827  |
| 22            | 6             | 0           | 6.125643                | -0.092949 | -0.435146 |
| 23            | 6             | 0           | 5.358682                | -0.136181 | -1.601043 |
| 24            | 6             | 0           | 4.207190                | 0.641646  | -1.770066 |
| 25            | 6             | 0           | 3.812718                | 1.509548  | -0.723668 |
| 26            | 6             | 0           | 4.562891                | 1.559343  | 0.476008  |
| 27            | 6             | 0           | 5.699654                | 0.752083  | 0.591878  |
| 28            | 1             | 0           | 5.668610                | -0.788204 | -2.413170 |
| 29            | 1             | 0           | 6.287240                | 0.794323  | 1.504881  |
| 30            | 8             | 0           | 0.563518                | -0.764901 | -1.325189 |
| 31            | 1             | 0           | 0.322905                | -1.932103 | 1.083773  |
| 32            | 7             | 0           | -0.012584               | -0.937259 | 1.198529  |
| 33            | 16            | 0           | -0.511628               | -0.552199 | 2.736914  |
| 34            | 8             | 0           | -0.830230               | -1.807691 | 3.407007  |
| 35            | 8             | 0           | -1.432362               | 0.576141  | 2.681323  |
| 36            | 6             | 0           | 0.998641                | 0.120162  | 3.639726  |
| 37            | 9             | 0           | 2.070016                | -0.646086 | 3.403315  |
| 38            | 9             | 0           | 1.252224                | 1.368096  | 3.258463  |
| 39            | 9             | 0           | 0.724205                | 0.099111  | 4.942889  |
| 40            | 6             | 0           | 1.872859                | 4.550207  | -1.970870 |
| 41            | 6             | 0           | 0.581623                | 4.377891  | -1.377529 |
| 42            | 6             | 0           | -1.433783               | 4.194425  | 1.046803  |
| 43            | 6             | 0           | -2.800261               | 4.163560  | 1.466414  |
| 44            | 6             | 0           | -1.152151               | -5.214414 | 1.386699  |
| 45            | 6             | 0           | -2.106959               | -4.185323 | 1.058651  |
| 46            | 6             | 0           | -2.869745               | -4.179252 | -0.082647 |
| 47            | 8             | 0           | 1.235868                | -5.880029 | 0.623554  |
| 48            | 5             | 0           | 0.269889                | -4.847875 | 0.495000  |
| 49            | 8             | 0           | -0.267211               | -4.804722 | -0.935791 |
| 50            | 8             | 0           | 0.912737                | -3.582574 | 0.868641  |
| 51            | 6             | 0           | -1.053893               | -3.889210 | -1.373941 |
| 52            | 6             | 0           | 2.260472                | -3.895595 | 1.328184  |
| 53            | 6             | 0           | 2.535181                | -5.273261 | 0.621100  |
| 54            | 6             | 0           | 3.010602                | -5.112195 | -0.834691 |
| 55            | 6             | 0           | 3.496991                | -6.199920 | 1.368357  |
| 56            | 6             | 0           | 3.205269                | -2.768091 | 0.915501  |
| 57            | 6             | 0           | 2.219568                | -4.029853 | 2.858037  |
| 58            | 1             | 0           | -0.833082               | -5.203064 | 2.431183  |
| 59            | 1             | 0           | -1.442992               | -6.220971 | 1.074556  |
| 60            | 1             | 0           | -2.050970               | -3.265294 | 1.639800  |
| 61            | 1             | 0           | -3.102242               | -5.113623 | -0.586707 |
| 62            | 1             | 0           | -3.520857               | -3.337324 | -0.297417 |
| 63            | 1             | 0           | -0.905550               | -2.868404 | -1.018998 |
| 64            | 1             | 0           | 2.373436                | -4.419748 | -1.391570 |
| 65            | 1             | 0           | 2.960853                | -6.088668 | -1.327187 |
| 66            | 1             | 0           | 4.043615                | -4.750584 | -0.888146 |
| 67            | 1             | 0           | 3.611808                | -7.132573 | 0.805886  |
| 68            | 1             | 0           | 3.118637                | -6.453715 | 2.361138  |
| 69            | 1             | 0           | 4.489057                | -5.744747 | 1.474081  |
| 70            | 1             | 0           | 2.976062                | -1.849625 | 1.462922  |
| 71            | 1             | 0           | 3.134447                | -2.549662 | -0.151972 |
| 72            | 1             | 0           | 4.242797                | -3.034833 | 1.147909  |
| 73            | 1             | 0           | 1.590041                | -4.871418 | 3.160345  |
| 74            | 1             | 0           | 1.804395                | -3.120806 | 3.298835  |
| 75            | 1             | 0           | 3.222133                | -4.181670 | 3.273101  |
| 76            | 6             | 0           | -1.546709               | -4.026723 | -2.810291 |
| 77            | 6             | 0           | -1.833790               | -5.488168 | -3.186796 |
| 78            | 1             | 0           | -2.691776               | -5.885956 | -2.633419 |
| 79            | 1             | 0           | -2.067779               | -5.556022 | -4.255169 |
| 80            | 1             | 0           | -0.971602               | -6.127606 | -2.979964 |
| 81            | 6             | 0           | -0.348104               | -3.499641 | -3.654008 |
| 82            | 1             | 0           | -0.622081               | -3.508040 | -4.715437 |
| 83            | 1             | 0           | -0.080449               | -2.475812 | -3.372624 |
| 84            | 1             | 0           | 0.532297                | -4.135487 | -3.518402 |
| 85            | 6             | 0           | -2.768564               | -3.134792 | -3.082949 |

|     |   |   |           |           |           |
|-----|---|---|-----------|-----------|-----------|
| 86  | 1 | 0 | -2.622032 | -2.117422 | -2.705500 |
| 87  | 1 | 0 | -2.942069 | -3.066985 | -4.162913 |
| 88  | 1 | 0 | -3.677034 | -3.538771 | -2.626567 |
| 89  | 6 | 0 | 4.213716  | 2.532705  | 1.603512  |
| 90  | 1 | 0 | 3.141128  | 2.745243  | 1.546469  |
| 91  | 6 | 0 | 3.446817  | 0.548309  | -3.094268 |
| 92  | 1 | 0 | 2.491266  | 1.067237  | -2.973165 |
| 93  | 6 | 0 | 7.411171  | -0.898925 | -0.292846 |
| 94  | 1 | 0 | 7.766802  | -0.758643 | 0.737272  |
| 95  | 6 | 0 | -3.594376 | 1.662227  | -2.545429 |
| 96  | 1 | 0 | -2.901634 | 2.336483  | -2.037166 |
| 97  | 6 | 0 | -4.717275 | 0.261109  | 2.321697  |
| 98  | 1 | 0 | -3.870248 | 0.908484  | 2.556010  |
| 99  | 6 | 0 | -6.979062 | -1.945749 | -1.626554 |
| 100 | 1 | 0 | -6.813431 | -2.024096 | -2.710006 |
| 101 | 6 | 0 | -6.869128 | -3.363908 | -1.040306 |
| 102 | 1 | 0 | -7.606174 | -4.028210 | -1.506643 |
| 103 | 1 | 0 | -5.874460 | -3.791244 | -1.207167 |
| 104 | 1 | 0 | -7.057689 | -3.371358 | 0.039441  |
| 105 | 6 | 0 | -8.398089 | -1.378632 | -1.417802 |
| 106 | 1 | 0 | -8.626056 | -1.276781 | -0.349992 |
| 107 | 1 | 0 | -8.500455 | -0.389070 | -1.876334 |
| 108 | 1 | 0 | -9.151210 | -2.041307 | -1.861155 |
| 109 | 6 | 0 | -4.642546 | 2.556364  | -3.240082 |
| 110 | 1 | 0 | -5.364058 | 1.961295  | -3.811810 |
| 111 | 1 | 0 | -5.204253 | 3.149579  | -2.509826 |
| 112 | 1 | 0 | -4.152940 | 3.247378  | -3.936898 |
| 113 | 6 | 0 | -2.771608 | 0.871988  | -3.579354 |
| 114 | 1 | 0 | -1.980673 | 0.292322  | -3.093935 |
| 115 | 1 | 0 | -3.398395 | 0.181749  | -4.156181 |
| 116 | 1 | 0 | -2.298900 | 1.559755  | -4.290993 |
| 117 | 6 | 0 | -5.990032 | 0.918743  | 2.896295  |
| 118 | 1 | 0 | -6.874130 | 0.293518  | 2.721981  |
| 119 | 1 | 0 | -5.890430 | 1.062281  | 3.978950  |
| 120 | 1 | 0 | -6.187299 | 1.896389  | 2.442566  |
| 121 | 6 | 0 | -4.459209 | -1.082513 | 3.028617  |
| 122 | 1 | 0 | -3.560344 | -1.572846 | 2.645543  |
| 123 | 1 | 0 | -4.313669 | -0.919208 | 4.102527  |
| 124 | 1 | 0 | -5.299100 | -1.777530 | 2.912353  |
| 125 | 6 | 0 | 4.218986  | 1.251053  | -4.229462 |
| 126 | 1 | 0 | 3.647561  | 1.211094  | -5.164679 |
| 127 | 1 | 0 | 4.413686  | 2.303830  | -3.997473 |
| 128 | 1 | 0 | 5.186675  | 0.766400  | -4.407160 |
| 129 | 6 | 0 | 3.114642  | -0.903126 | -3.487223 |
| 130 | 1 | 0 | 2.512857  | -0.910385 | -4.404137 |
| 131 | 1 | 0 | 4.017278  | -1.493090 | -3.686112 |
| 132 | 1 | 0 | 2.537501  | -1.396031 | -2.701264 |
| 133 | 6 | 0 | 8.508948  | -0.365551 | -1.234693 |
| 134 | 1 | 0 | 8.219786  | -0.486549 | -2.285512 |
| 135 | 1 | 0 | 8.697018  | 0.699631  | -1.061098 |
| 136 | 1 | 0 | 9.449252  | -0.908852 | -1.081397 |
| 137 | 6 | 0 | 7.196357  | -2.408245 | -0.504020 |
| 138 | 1 | 0 | 6.450488  | -2.805037 | 0.192813  |
| 139 | 1 | 0 | 6.851988  | -2.626625 | -1.521678 |
| 140 | 1 | 0 | 8.133895  | -2.955053 | -0.347857 |
| 141 | 6 | 0 | 4.960481  | 3.870195  | 1.417643  |
| 142 | 1 | 0 | 6.045419  | 3.715936  | 1.460789  |
| 143 | 1 | 0 | 4.724574  | 4.331372  | 0.453219  |
| 144 | 1 | 0 | 4.687611  | 4.579098  | 2.209056  |
| 145 | 6 | 0 | 4.478499  | 1.970778  | 3.011463  |
| 146 | 1 | 0 | 4.021967  | 0.986510  | 3.145624  |
| 147 | 1 | 0 | 5.550054  | 1.879266  | 3.222692  |
| 148 | 1 | 0 | 4.058890  | 2.646520  | 3.765638  |
| 149 | 6 | 0 | 2.106350  | 5.651482  | -2.838295 |
| 150 | 1 | 0 | 3.097883  | 5.770811  | -3.268072 |
| 151 | 6 | 0 | -0.442312 | 5.299052  | -1.734236 |
| 152 | 1 | 0 | -1.439293 | 5.168675  | -1.332240 |
| 153 | 6 | 0 | -0.190380 | 6.344796  | -2.594828 |
| 154 | 1 | 0 | -0.993588 | 7.027678  | -2.857647 |
| 155 | 6 | 0 | 1.098863  | 6.535748  | -3.143800 |
| 156 | 1 | 0 | 1.285076  | 7.370244  | -3.814039 |
| 157 | 6 | 0 | -0.623989 | 5.280288  | 1.477451  |
| 158 | 1 | 0 | 0.422548  | 5.305549  | 1.195089  |
| 159 | 6 | 0 | -3.311894 | 5.223668  | 2.261016  |
| 160 | 1 | 0 | -4.355662 | 5.188250  | 2.563438  |
| 161 | 6 | 0 | -2.502651 | 6.263794  | 2.656701  |
| 162 | 1 | 0 | -2.900892 | 7.064135  | 3.274083  |
| 163 | 6 | 0 | -1.143243 | 6.282762  | 2.267650  |
| 164 | 1 | 0 | -0.499971 | 7.093530  | 2.598548  |

#### TS Re\_E (B3LYP)

B3LYP/6-31g(d); E(RB3LYP) = -4248.121262 hartree  
 Sum of electronic and thermal Free Energies= -4246.862435 hartree  
 Thermal correction to Gibbs Free Energy= 1.258826 hartree

| Center Number | Atomic Number | Atomic Type | Coordinates (Angstroms) |          |           |
|---------------|---------------|-------------|-------------------------|----------|-----------|
|               |               |             | X                       | Y        | Z         |
| 1             | 5             | 0           | -2.378151               | 3.638164 | -0.161646 |
| 2             | 6             | 0           | -0.871731               | 4.441022 | -0.002753 |
| 3             | 6             | 0           | -1.129888               | 5.413614 | 1.037131  |
| 4             | 6             | 0           | -1.042892               | 5.131547 | 2.377900  |

|     |    |   |           |           |           |     |   |   |           |           |           |
|-----|----|---|-----------|-----------|-----------|-----|---|---|-----------|-----------|-----------|
| 5   | 1  | 0 | -0.685172 | 4.880256  | -0.985645 | 104 | 1 | 0 | 5.563334  | -4.469600 | 4.608257  |
| 6   | 1  | 0 | -0.122042 | 3.686863  | 0.246140  | 105 | 6 | 0 | 3.498249  | 2.105762  | 2.730154  |
| 7   | 1  | 0 | -1.596535 | 6.343780  | 0.736662  | 106 | 1 | 0 | 3.112112  | 1.091721  | 2.869113  |
| 8   | 1  | 0 | -1.305920 | 5.887892  | 3.111897  | 107 | 6 | 0 | 4.998986  | 0.087683  | -1.768000 |
| 9   | 1  | 0 | -0.425836 | 4.310296  | 2.726406  | 108 | 1 | 0 | 4.285298  | -0.705070 | -1.521845 |
| 10  | 8  | 0 | -3.439445 | 4.564022  | -0.439645 | 109 | 6 | 0 | 5.263158  | 5.087915  | -0.943349 |
| 11  | 6  | 0 | -4.347255 | 3.925687  | -1.352078 | 110 | 1 | 0 | 5.058627  | 5.779487  | -0.114306 |
| 12  | 8  | 0 | -2.409468 | 2.597928  | -1.169418 | 111 | 6 | 0 | -2.177549 | -2.922933 | 2.784552  |
| 13  | 6  | 0 | -3.383622 | 2.997385  | -2.176488 | 112 | 1 | 0 | -1.163274 | -3.158201 | 2.452915  |
| 14  | 6  | 0 | -5.391435 | 3.132175  | -0.545867 | 113 | 6 | 0 | -3.122001 | -3.113759 | -2.302781 |
| 15  | 1  | 0 | -4.923172 | 2.322860  | 0.021889  | 114 | 1 | 0 | -2.057332 | -3.350098 | -2.336696 |
| 16  | 1  | 0 | -5.881389 | 3.810369  | 0.161505  | 115 | 6 | 0 | -6.732448 | -1.762780 | 0.965472  |
| 17  | 1  | 0 | -6.163757 | 2.699463  | -1.191182 | 116 | 1 | 0 | -6.816783 | -1.556202 | 2.041375  |
| 18  | 6  | 0 | -5.052264 | 5.011823  | -2.167058 | 117 | 6 | 0 | 2.333512  | 3.066050  | 3.030503  |
| 19  | 1  | 0 | -5.688958 | 5.610453  | -1.506285 | 118 | 1 | 0 | 2.634592  | 4.117072  | 2.950370  |
| 20  | 1  | 0 | -4.334188 | 5.685072  | -2.640435 | 119 | 1 | 0 | 1.503232  | 2.883196  | 2.344425  |
| 21  | 1  | 0 | -5.689878 | 4.574864  | -2.944639 | 120 | 1 | 0 | 1.974723  | 2.904820  | 4.054940  |
| 22  | 6  | 0 | -4.044584 | 1.747872  | -2.754669 | 121 | 6 | 0 | 4.643939  | 2.309240  | 3.742701  |
| 23  | 1  | 0 | -4.416823 | 1.088827  | -1.966044 | 122 | 1 | 0 | 4.279296  | 2.177715  | 4.768819  |
| 24  | 1  | 0 | -3.323329 | 1.190881  | -3.357920 | 123 | 1 | 0 | 5.460461  | 1.596909  | 3.579410  |
| 25  | 1  | 0 | -4.884072 | 2.023005  | -3.404817 | 124 | 1 | 0 | 5.066153  | 3.318259  | 3.663225  |
| 26  | 6  | 0 | -2.649161 | 3.763219  | -3.288058 | 125 | 6 | 0 | 4.393340  | 5.528053  | -2.136213 |
| 27  | 1  | 0 | -2.216816 | 4.693767  | -2.908295 | 126 | 1 | 0 | 4.559050  | 4.884465  | -3.008111 |
| 28  | 1  | 0 | -1.844848 | 3.139556  | -3.683887 | 127 | 1 | 0 | 3.327943  | 5.480097  | -1.887271 |
| 29  | 1  | 0 | -3.325887 | 4.012144  | -4.113331 | 128 | 1 | 0 | 4.632269  | 6.557475  | -2.430055 |
| 30  | 8  | 0 | -2.520803 | 2.999621  | 1.231050  | 129 | 6 | 0 | 6.762039  | 5.203690  | -1.278978 |
| 31  | 6  | 0 | -2.847861 | 3.747909  | 2.219766  | 130 | 1 | 0 | 7.015644  | 6.231376  | -1.566013 |
| 32  | 1  | 0 | -3.505174 | 4.593628  | 2.003455  | 131 | 1 | 0 | 7.383431  | 4.925631  | -0.420457 |
| 33  | 8  | 0 | -0.293224 | -1.269162 | 0.781367  | 132 | 1 | 0 | 7.035293  | 4.548881  | -2.114941 |
| 34  | 15 | 0 | 0.341334  | 0.102598  | 0.180015  | 133 | 6 | 0 | 4.830767  | 0.380333  | -3.268677 |
| 35  | 8  | 0 | 1.794984  | -0.335244 | -0.370099 | 134 | 1 | 0 | 4.900252  | -0.555115 | -3.836374 |
| 36  | 8  | 0 | 0.219653  | 1.172266  | 1.187488  | 135 | 1 | 0 | 3.861745  | 0.839872  | -3.478702 |
| 37  | 6  | 0 | -0.042520 | -2.556051 | 0.301616  | 136 | 1 | 0 | 5.617822  | 1.042957  | -3.647912 |
| 38  | 6  | 0 | 1.260317  | -3.034502 | 0.261173  | 137 | 6 | 0 | 6.413620  | -0.463367 | -1.488065 |
| 39  | 6  | 0 | -1.181076 | -3.364627 | -0.000456 | 138 | 1 | 0 | 6.532311  | -0.760405 | -0.440770 |
| 40  | 6  | 0 | 1.493778  | -4.311782 | -0.362105 | 139 | 1 | 0 | 6.617949  | -1.340273 | -2.114961 |
| 41  | 6  | 0 | -0.936205 | -4.639544 | -0.469323 | 140 | 1 | 0 | 7.173839  | 0.295309  | -1.710208 |
| 42  | 6  | 0 | 0.371400  | -5.122622 | -0.720202 | 141 | 6 | 0 | -2.074975 | -1.692298 | 3.702202  |
| 43  | 1  | 0 | -1.779228 | -5.292781 | -0.676663 | 142 | 1 | 0 | -1.676189 | -0.831269 | 3.159088  |
| 44  | 6  | 0 | 2.675969  | -0.978795 | 0.516393  | 143 | 1 | 0 | -3.050132 | -1.413750 | 4.119361  |
| 45  | 6  | 0 | 2.392999  | -2.283982 | 0.878564  | 144 | 1 | 0 | -1.405572 | -1.903639 | 4.544875  |
| 46  | 6  | 0 | 3.834957  | -0.264651 | 0.933024  | 145 | 6 | 0 | -2.683403 | -4.155079 | 3.563171  |
| 47  | 6  | 0 | 3.224429  | -2.900422 | 1.881251  | 146 | 1 | 0 | -2.710918 | -5.044629 | 2.923794  |
| 48  | 6  | 0 | 4.675955  | -0.914748 | 1.813410  | 147 | 1 | 0 | -2.025179 | -4.367253 | 4.414512  |
| 49  | 6  | 0 | 4.387302  | -2.200314 | 2.335944  | 148 | 1 | 0 | -3.695029 | -3.994374 | 3.954078  |
| 50  | 1  | 0 | 5.580810  | -0.410872 | 2.141931  | 149 | 6 | 0 | -7.153980 | -0.485583 | 0.217110  |
| 51  | 6  | 0 | 4.167520  | 1.113878  | 0.439786  | 150 | 1 | 0 | -6.499566 | 0.355880  | 0.467439  |
| 52  | 6  | 0 | 4.011962  | 2.227613  | 1.294817  | 151 | 1 | 0 | -7.114842 | -0.626866 | -0.869495 |
| 53  | 6  | 0 | 4.706278  | 1.284483  | -0.861170 | 152 | 1 | 0 | -8.182464 | -0.208049 | 0.477608  |
| 54  | 6  | 0 | 4.379666  | 3.493552  | 0.819260  | 153 | 6 | 0 | -7.687638 | -2.929221 | 0.645280  |
| 55  | 6  | 0 | 5.052780  | 2.569978  | -1.281077 | 154 | 1 | 0 | -8.721234 | -2.664734 | 0.899330  |
| 56  | 6  | 0 | 4.892054  | 3.691818  | -0.460875 | 155 | 1 | 0 | -7.660093 | -3.181805 | -0.421425 |
| 57  | 1  | 0 | 4.260277  | 4.355799  | 1.471080  | 156 | 1 | 0 | -7.416686 | -3.829209 | 1.208084  |
| 58  | 1  | 0 | 5.460770  | 2.702648  | -2.278226 | 157 | 6 | 0 | -3.340207 | -1.923465 | -3.252605 |
| 59  | 6  | 0 | -2.590925 | -2.905800 | 0.230399  | 158 | 1 | 0 | -2.763523 | -1.051819 | -2.933979 |
| 60  | 6  | 0 | -3.498418 | -2.791458 | -0.854654 | 159 | 1 | 0 | -3.020086 | -2.186258 | -4.268053 |
| 61  | 6  | 0 | -3.046902 | -2.672664 | 1.551274  | 160 | 1 | 0 | -4.394480 | -1.628291 | -3.304975 |
| 62  | 6  | 0 | -4.817728 | -2.404374 | -0.593366 | 161 | 6 | 0 | -3.880415 | -4.357385 | -2.810442 |
| 63  | 6  | 0 | -4.377332 | -2.287965 | 1.749801  | 162 | 1 | 0 | -3.707268 | -5.228240 | -2.167660 |
| 64  | 6  | 0 | -5.281718 | -2.142127 | 0.697447  | 163 | 1 | 0 | -4.962273 | -4.182392 | -2.840355 |
| 65  | 1  | 0 | -5.507603 | -2.319549 | -1.429177 | 164 | 1 | 0 | -3.556452 | -4.614851 | -3.826069 |
| 66  | 1  | 0 | -4.729787 | -2.119507 | 2.765042  |     |   |   |           |           |           |
| 67  | 7  | 0 | -0.414282 | 0.442222  | -1.308395 |     |   |   |           |           |           |
| 68  | 1  | 0 | -1.219943 | 1.108752  | -1.243598 |     |   |   |           |           |           |
| 69  | 16 | 0 | 0.306124  | 0.619125  | -2.826852 |     |   |   |           |           |           |
| 70  | 8  | 0 | -0.787553 | 0.963075  | -3.730761 |     |   |   |           |           |           |
| 71  | 8  | 0 | 1.538113  | 1.394498  | -2.793469 |     |   |   |           |           |           |
| 72  | 6  | 0 | 0.804624  | -1.142349 | -3.314096 |     |   |   |           |           |           |
| 73  | 9  | 0 | -0.041488 | -2.033679 | -2.795318 |     |   |   |           |           |           |
| 74  | 9  | 0 | 2.042489  | -1.425112 | -2.921828 |     |   |   |           |           |           |
| 75  | 9  | 0 | 0.742596  | -1.193985 | -4.643618 |     |   |   |           |           |           |
| 76  | 6  | 0 | -2.976763 | 3.109088  | 3.597459  |     |   |   |           |           |           |
| 77  | 6  | 0 | -1.752775 | 2.259950  | 3.980523  |     |   |   |           |           |           |
| 78  | 1  | 0 | -0.916783 | 2.888490  | 4.303884  |     |   |   |           |           |           |
| 79  | 1  | 0 | -2.006546 | 1.596777  | 4.815158  |     |   |   |           |           |           |
| 80  | 1  | 0 | -1.410665 | 1.651242  | 3.139684  |     |   |   |           |           |           |
| 81  | 6  | 0 | -4.219567 | 2.180816  | 3.464292  |     |   |   |           |           |           |
| 82  | 1  | 0 | -4.448026 | 1.739548  | 4.441157  |     |   |   |           |           |           |
| 83  | 1  | 0 | -5.105074 | 2.734069  | 3.129105  |     |   |   |           |           |           |
| 84  | 1  | 0 | -4.026804 | 1.373956  | 2.751569  |     |   |   |           |           |           |
| 85  | 6  | 0 | -3.269903 | 4.176463  | 4.665251  |     |   |   |           |           |           |
| 86  | 1  | 0 | -4.123945 | 4.805091  | 4.383823  |     |   |   |           |           |           |
| 87  | 1  | 0 | -3.514096 | 3.693231  | 5.617713  |     |   |   |           |           |           |
| 88  | 1  | 0 | -2.407796 | 4.828200  | 4.835667  |     |   |   |           |           |           |
| 89  | 6  | 0 | 0.587079  | -6.394246 | -1.316656 |     |   |   |           |           |           |
| 90  | 1  | 0 | -0.278370 | -7.001347 | -1.570921 |     |   |   |           |           |           |
| 91  | 6  | 0 | 2.794891  | -4.797911 | -0.667846 |     |   |   |           |           |           |
| 92  | 1  | 0 | 3.657759  | -4.183107 | -0.439655 |     |   |   |           |           |           |
| 93  | 6  | 0 | 2.926317  | -4.157427 | 2.476395  |     |   |   |           |           |           |
| 94  | 1  | 0 | 2.029749  | -4.687197 | 2.177820  |     |   |   |           |           |           |
| 95  | 6  | 0 | 5.226466  | -2.798219 | 3.314737  |     |   |   |           |           |           |
| 96  | 1  | 0 | 6.111600  | -2.256326 | 3.638765  |     |   |   |           |           |           |
| 97  | 6  | 0 | 1.859895  | -6.840812 | -1.585495 |     |   |   |           |           |           |
| 98  | 1  | 0 | 2.014269  | -7.810238 | -2.050974 |     |   |   |           |           |           |
| 99  | 6  | 0 | 2.971334  | -6.025260 | -1.268208 |     |   |   |           |           |           |
| 100 | 1  | 0 | 3.974994  | -6.367838 | -1.504494 |     |   |   |           |           |           |
| 101 | 6  | 0 | 3.748836  | -4.701209 | 3.438303  |     |   |   |           |           |           |
| 102 | 1  | 0 | 3.492366  | -5.657947 | 3.884890  |     |   |   |           |           |           |
| 103 | 6  | 0 | 4.919183  | -4.024923 | 3.854831  |     |   |   |           |           |           |

  

| TS Si_A (B3LYP)                                                   |        |        |                         |           |           |           |  |  |  |  |  |
|-------------------------------------------------------------------|--------|--------|-------------------------|-----------|-----------|-----------|--|--|--|--|--|
| B3LYP/6-31g(d); E(RB3LYP) = -4248.120157 hartree                  |        |        |                         |           |           |           |  |  |  |  |  |
| Sum of electronic and thermal Free Energies= -4246.859715 hartree |        |        |                         |           |           |           |  |  |  |  |  |
| Thermal correction to Gibbs Free Energy= 1.260442 hartree         |        |        |                         |           |           |           |  |  |  |  |  |
| Center                                                            | Atomic | Atomic | Coordinates (Angstroms) |           |           |           |  |  |  |  |  |
| Number                                                            | Number | Type   | X                       | Y         | Z         |           |  |  |  |  |  |
|                                                                   | 1      | 5      | 0                       | 1.039528  | -4.519935 | -0.563647 |  |  |  |  |  |
|                                                                   | 2      | 6      | 0                       | -0.506161 | -4.575757 | -1.301998 |  |  |  |  |  |
|                                                                   | 3      | 6      | 0                       | -1.467720 | -3.947376 | -0.425789 |  |  |  |  |  |
|                                                                   | 4      | 6      | 0                       | -1.999641 | -4.554707 | 0.684994  |  |  |  |  |  |
|                                                                   | 5      | 1      | 0                       | -0.385744 | -4.070753 | -2.263503 |  |  |  |  |  |
|                                                                   | 6      | 1      | 0                       | -0.680024 | -5.645094 | -1.450659 |  |  |  |  |  |
|                                                                   | 7      | 1      | 0                       | -1.629304 | -2.875786 | -0.532161 |  |  |  |  |  |
|                                                                   | 8      | 1      | 0                       | -2.683560 | -4.007884 | 1.325099  |  |  |  |  |  |
|                                                                   | 9      | 1      | 0                       | -2.024198 | -5.638712 | 0.755404  |  |  |  |  |  |
|                                                                   | 10     | 8      | 0                       | 1.643089  | -3.186488 | -0.536246 |  |  |  |  |  |
|                                                                   | 11     | 8      | 0                       | 1.963706  | -5.407075 | -1.181462 |  |  |  |  |  |
|                                                                   | 12     | 6      | 0                       | 3.126420  | -4.681424 | -1.594645 |  |  |  |  |  |
|                                                                   | 13     | 6      | 0                       | 3.679024  | -3.622018 | 0.707661  |  |  |  |  |  |
|                                                                   | 14     | 1      | 0                       | 3.276293  | -4.524386 | 1.174700  |  |  |  |  |  |
|                                                                   | 15     | 1      | 0                       | 3.438471  | -2.764386 | 1.345072  |  |  |  |  |  |
|                                                                   | 16     | 1      | 0                       | 4.769347  | -3.717155 | 0.661098  |  |  |  |  |  |
|                                                                   | 17     | 6      | 0                       | 3.697142  | -2.152269 | -1.317903 |  |  |  |  |  |
|                                                                   | 18     | 1      | 0                       | 3.620506  | -1.298149 | -0.637039 |  |  |  |  |  |
|                                                                   | 19     | 1      |                         |           |           |           |  |  |  |  |  |

|     |    |   |           |           |           |     |   |   |           |           |           |
|-----|----|---|-----------|-----------|-----------|-----|---|---|-----------|-----------|-----------|
| 29  | 8  | 0 | 0.748587  | -5.066576 | 0.843486  | 128 | 1 | 0 | 2.904526  | 3.259415  | 4.805127  |
| 30  | 6  | 0 | 0.003009  | -4.471452 | 1.702907  | 129 | 6 | 0 | 2.329368  | 0.734228  | 3.825822  |
| 31  | 1  | 0 | -0.002753 | -3.378013 | 1.720676  | 130 | 1 | 0 | 1.767178  | 0.060313  | 3.173080  |
| 32  | 1  | 0 | -5.253381 | 2.377532  | 1.644852  | 131 | 1 | 0 | 3.152291  | 0.168501  | 4.278704  |
| 33  | 6  | 0 | -4.200654 | 2.530652  | 1.423491  | 132 | 1 | 0 | 1.663541  | 1.051621  | 4.637332  |
| 34  | 6  | 0 | -3.534756 | 1.579873  | 0.676181  | 133 | 6 | 0 | 8.358224  | 0.810557  | 1.440179  |
| 35  | 6  | 0 | -3.553575 | 3.670808  | 1.960060  | 134 | 1 | 0 | 8.212305  | 1.696090  | 2.068371  |
| 36  | 6  | 0 | -2.163416 | 1.837380  | 0.391719  | 135 | 1 | 0 | 9.277071  | 0.307695  | 1.765128  |
| 37  | 6  | 0 | -2.177204 | 3.906674  | 1.648594  | 136 | 1 | 0 | 8.510691  | 1.153465  | 0.409791  |
| 38  | 6  | 0 | -1.501276 | 2.995814  | 0.758367  | 137 | 6 | 0 | 7.392072  | -1.413380 | 0.696321  |
| 39  | 8  | 0 | -1.460386 | 0.884163  | -0.369233 | 138 | 1 | 0 | 6.557436  | -2.115525 | 0.791546  |
| 40  | 6  | 0 | -0.136897 | 3.317655  | 0.250007  | 139 | 1 | 0 | 7.511138  | -1.176095 | -0.367512 |
| 41  | 15 | 0 | -0.273918 | 0.045441  | 0.333835  | 140 | 1 | 0 | 8.305864  | -1.922489 | 1.024944  |
| 42  | 6  | 0 | 0.940644  | 2.456669  | 0.415620  | 141 | 6 | 0 | 4.336729  | 1.025506  | -2.940537 |
| 43  | 6  | 0 | 0.096881  | 4.585076  | -0.394567 | 142 | 1 | 0 | 3.515896  | 0.326878  | -2.763948 |
| 44  | 8  | 0 | 0.730830  | 1.173659  | 0.927886  | 143 | 1 | 0 | 4.234085  | 1.415735  | -3.960302 |
| 45  | 8  | 0 | -0.581542 | -0.939538 | 1.390809  | 144 | 1 | 0 | 5.274777  | 0.460639  | -2.896612 |
| 46  | 6  | 0 | 2.298252  | 2.863157  | 0.225232  | 145 | 6 | 0 | 5.405589  | 3.217850  | -2.282866 |
| 47  | 6  | 0 | 1.443607  | 5.005800  | -0.619577 | 146 | 1 | 0 | 6.405445  | 2.770578  | -2.238395 |
| 48  | 6  | 0 | 2.502718  | 4.147762  | -0.240230 | 147 | 1 | 0 | 5.256893  | 3.598797  | -3.300405 |
| 49  | 1  | 0 | 3.521482  | 4.506706  | -0.350519 | 148 | 1 | 0 | 5.400472  | 4.072232  | -1.596569 |
| 50  | 7  | 0 | 0.443016  | -0.648550 | -1.042612 | 149 | 6 | 0 | -4.242586 | 4.569321  | 2.819171  |
| 51  | 1  | 0 | 0.974365  | -1.537383 | -0.845770 | 150 | 1 | 0 | -5.291484 | 4.379743  | 3.033494  |
| 52  | 16 | 0 | -0.123531 | -0.692360 | -2.628048 | 151 | 6 | 0 | -1.533138 | 5.013137  | 2.268347  |
| 53  | 8  | 0 | 0.859737  | -1.471273 | -3.373893 | 152 | 1 | 0 | -0.479877 | 5.186798  | 2.083647  |
| 54  | 8  | 0 | -1.547201 | -0.995154 | -2.708038 | 153 | 6 | 0 | -3.594409 | 5.642104  | 3.384426  |
| 55  | 6  | 0 | 0.073758  | 1.088043  | -3.239297 | 154 | 1 | 0 | -4.127369 | 6.318305  | 4.046962  |
| 56  | 9  | 0 | 0.263489  | 1.018947  | -4.554912 | 155 | 6 | 0 | -2.221756 | 5.852865  | 3.115696  |
| 57  | 9  | 0 | 1.132011  | 1.664021  | -2.665329 | 156 | 1 | 0 | -1.702555 | 6.683150  | 3.586353  |
| 58  | 9  | 0 | -1.013798 | 1.809649  | -2.987668 | 157 | 6 | 0 | -0.952083 | 5.435375  | -0.841537 |
| 59  | 6  | 0 | 3.489197  | 2.005565  | 0.539426  | 158 | 1 | 0 | -1.981339 | 5.119376  | -0.718232 |
| 60  | 6  | 0 | 3.737377  | 1.582937  | 1.869862  | 159 | 6 | 0 | 1.694920  | 6.267594  | -1.223368 |
| 61  | 6  | 0 | 4.445085  | 1.719135  | -0.475118 | 160 | 1 | 0 | 2.727032  | 6.574363  | -1.374137 |
| 62  | 6  | 0 | 4.907325  | 0.866152  | 2.146030  | 161 | 6 | 0 | 0.657017  | 7.072968  | -1.629872 |
| 63  | 6  | 0 | 5.599715  | 1.006696  | -0.132341 | 162 | 1 | 0 | 0.857683  | 8.031047  | -2.101095 |
| 64  | 6  | 0 | 5.856849  | 0.569340  | 1.168563  | 163 | 6 | 0 | -0.678023 | 6.641404  | -1.448440 |
| 65  | 1  | 0 | 5.101936  | 0.554528  | 3.169777  | 164 | 1 | 0 | -1.496876 | 7.265595  | -1.795368 |
| 66  | 1  | 0 | 6.329760  | 0.799817  | -0.910562 |     |   |   |           |           |           |
| 67  | 6  | 0 | -4.250746 | 0.346843  | 0.210397  |     |   |   |           |           |           |
| 68  | 6  | 0 | -4.639066 | 0.217072  | -1.147919 |     |   |   |           |           |           |
| 69  | 6  | 0 | -4.595356 | -0.654264 | 1.145885  |     |   |   |           |           |           |
| 70  | 6  | 0 | -5.316595 | -0.937465 | -1.543814 |     |   |   |           |           |           |
| 71  | 6  | 0 | -5.280088 | -1.789619 | 0.690679  |     |   |   |           |           |           |
| 72  | 6  | 0 | -5.637622 | -1.961191 | -0.645015 |     |   |   |           |           |           |
| 73  | 1  | 0 | -5.605362 | -1.043599 | -2.584498 |     |   |   |           |           |           |
| 74  | 1  | 0 | -5.546720 | -2.565247 | 1.405349  |     |   |   |           |           |           |
| 75  | 6  | 0 | -0.185719 | -5.181728 | 3.042805  |     |   |   |           |           |           |
| 76  | 6  | 0 | 1.150746  | -4.910485 | 3.794154  |     |   |   |           |           |           |
| 77  | 1  | 0 | 1.996881  | -5.357210 | 3.264097  |     |   |   |           |           |           |
| 78  | 1  | 0 | 1.340044  | -3.836449 | 3.903991  |     |   |   |           |           |           |
| 79  | 1  | 0 | 1.098052  | -5.348028 | 4.797680  |     |   |   |           |           |           |
| 80  | 6  | 0 | -1.333359 | -4.574056 | 3.863214  |     |   |   |           |           |           |
| 81  | 1  | 0 | -2.310824 | -4.812137 | 3.434642  |     |   |   |           |           |           |
| 82  | 1  | 0 | -1.310932 | -4.975059 | 4.882910  |     |   |   |           |           |           |
| 83  | 1  | 0 | -1.246294 | -3.484433 | 3.930037  |     |   |   |           |           |           |
| 84  | 6  | 0 | -0.367041 | -6.698496 | 2.874636  |     |   |   |           |           |           |
| 85  | 1  | 0 | -0.339005 | -7.186955 | 3.855251  |     |   |   |           |           |           |
| 86  | 1  | 0 | -1.330734 | -6.939565 | 2.413436  |     |   |   |           |           |           |
| 87  | 1  | 0 | 0.424579  | -7.124097 | 2.252482  |     |   |   |           |           |           |
| 88  | 6  | 0 | -4.423732 | 1.355271  | -2.147400 |     |   |   |           |           |           |
| 89  | 1  | 0 | -3.505004 | 1.881389  | -1.868025 |     |   |   |           |           |           |
| 90  | 6  | 0 | -4.293331 | -0.533836 | 2.640402  |     |   |   |           |           |           |
| 91  | 1  | 0 | -3.671273 | 0.351795  | 2.793883  |     |   |   |           |           |           |
| 92  | 6  | 0 | -6.356245 | -3.223651 | -1.103163 |     |   |   |           |           |           |
| 93  | 1  | 0 | -6.537022 | -3.833339 | -0.207000 |     |   |   |           |           |           |
| 94  | 6  | 0 | 2.842196  | 1.962345  | 3.051194  |     |   |   |           |           |           |
| 95  | 1  | 0 | 1.965424  | 2.490612  | 2.670873  |     |   |   |           |           |           |
| 96  | 6  | 0 | 4.313127  | 2.186750  | -1.929423 |     |   |   |           |           |           |
| 97  | 1  | 0 | 3.348033  | 2.682089  | -2.048230 |     |   |   |           |           |           |
| 98  | 6  | 0 | 7.151885  | -0.144828 | 1.534002  |     |   |   |           |           |           |
| 99  | 1  | 0 | 7.061690  | -0.456752 | 2.583584  |     |   |   |           |           |           |
| 100 | 6  | 0 | 3.078565  | -3.394820 | -0.689055 |     |   |   |           |           |           |
| 101 | 6  | 0 | -3.492819 | -1.728555 | 3.183329  |     |   |   |           |           |           |
| 102 | 1  | 0 | -3.265461 | -1.577882 | 4.245969  |     |   |   |           |           |           |
| 103 | 1  | 0 | -4.053068 | -2.667743 | 3.100592  |     |   |   |           |           |           |
| 104 | 1  | 0 | -2.547498 | -1.832087 | 2.644369  |     |   |   |           |           |           |
| 105 | 6  | 0 | -5.589652 | -0.330051 | 3.450857  |     |   |   |           |           |           |
| 106 | 1  | 0 | -5.359791 | -0.194934 | 4.514747  |     |   |   |           |           |           |
| 107 | 1  | 0 | -6.145599 | 0.550496  | 3.109306  |     |   |   |           |           |           |
| 108 | 1  | 0 | -6.257151 | -1.195393 | 3.359991  |     |   |   |           |           |           |
| 109 | 6  | 0 | -7.727052 | -2.915746 | -1.734012 |     |   |   |           |           |           |
| 110 | 1  | 0 | -8.246849 | -3.844430 | -1.998375 |     |   |   |           |           |           |
| 111 | 1  | 0 | -8.364469 | -2.351709 | -1.044025 |     |   |   |           |           |           |
| 112 | 1  | 0 | -7.620734 | -2.323756 | -2.650586 |     |   |   |           |           |           |
| 113 | 6  | 0 | -5.480153 | -4.056198 | -2.058840 |     |   |   |           |           |           |
| 114 | 1  | 0 | -5.262889 | -3.503449 | -2.980306 |     |   |   |           |           |           |
| 115 | 1  | 0 | -4.522893 | -4.314367 | -1.593373 |     |   |   |           |           |           |
| 116 | 1  | 0 | -5.989270 | -4.986690 | -2.338137 |     |   |   |           |           |           |
| 117 | 6  | 0 | -5.583460 | 2.370881  | -2.054683 |     |   |   |           |           |           |
| 118 | 1  | 0 | -5.421094 | 3.204793  | -2.748735 |     |   |   |           |           |           |
| 119 | 1  | 0 | -6.535203 | 1.893346  | -2.317124 |     |   |   |           |           |           |
| 120 | 1  | 0 | -5.682392 | 2.784202  | -1.045719 |     |   |   |           |           |           |
| 121 | 6  | 0 | -4.243904 | 0.896172  | -3.604009 |     |   |   |           |           |           |
| 122 | 1  | 0 | -3.473462 | 0.126182  | -3.688878 |     |   |   |           |           |           |
| 123 | 1  | 0 | -5.176109 | 0.503334  | -4.027477 |     |   |   |           |           |           |
| 124 | 1  | 0 | -3.947815 | 1.750732  | -4.223747 |     |   |   |           |           |           |
| 125 | 6  | 0 | 3.569962  | 2.945601  | 3.991694  |     |   |   |           |           |           |
| 126 | 1  | 0 | 4.457847  | 2.488874  | 4.444235  |     |   |   |           |           |           |
| 127 | 1  | 0 | 3.895108  | 3.842808  | 3.452901  |     |   |   |           |           |           |

**TS Si\_E (B3LYP)**

B3LYP/6-31g(d); E(RB3LYP) = -4248.123720 hartree

Sum of electronic and thermal Free Energies= -4246.866448 hartree

Thermal correction to Gibbs Free Energy= 1.252773 hartree

| Center Number | Atomic Number | Atomic Type | Coordinates (Angstroms) |          |           |
|---------------|---------------|-------------|-------------------------|----------|-----------|
|               |               |             | X                       | Y        | Z         |
| 1             | 5             | 0           | -0.269059               | 4.245361 | -0.800570 |
| 2             | 6             | 0           | -0.896986               | 3.801189 | -2.330851 |
| 3             | 6             | 0           | -2.013599               | 4.694318 | -2.529707 |
| 4             | 6             | 0           | -3.265358               | 4.488431 | -2.001995 |
| 5             | 1             | 0           | -0.072121               | 3.968121 | -3.027569 |
| 6             | 1             | 0           | -1.151802               | 2.741076 | -2.278285 |
| 7             | 1             | 0           | -1.787907               | 5.685830 | -2.924722 |
| 8             | 1             | 0           | -4.045207               | 5.229785 | -2.138239 |
| 9             | 1             | 0           | -3.587387               | 3.483117 | -1.750544 |
| 10            | 8             | 0           | 0.147895                | 5.616778 | -0.780100 |
| 11            | 6             | 0           | 1.353919                | 5.704128 | -0.000801 |
| 12            | 8             | 0           | 0.845941                | 3.433550 | -0.346177 |
| 13            | 6             | 0           | 2.009586                | 4.297321 | -0.249499 |
| 14            | 6             | 0           | 0.982016                | 5.929283 | 1.475498  |
| 15            | 1             | 0           | 0.442911                | 5.072295 | 1.888749  |
| 16            | 1             | 0           | 0.336255                | 6.811631 | 1.544068  |
| 17            | 1             | 0           | 1.867415                | 6.109139 | 2.095461  |
| 18            | 6             | 0           | 2.169147                | 6.892580 | -0.513784 |
| 19            | 1             | 0           | 1.629190                | 7.823300 | -0.308279 |
| 20            | 6             | 0           | 3.300885                | 6.830835 | -1.592601 |
| 21            | 1             | 0           | 3.143463                | 6.951423 | -0.014300 |
| 22            | 6             | 0           | 2.907135                | 3.801677 | 0.880731  |
| 23            | 1             | 0           | 2.350188                | 3.679432 | 1.811847  |
| 24            | 1             | 0           | 3.348079                | 2.836574 | 0.613105  |
| 25            | 1             | 0           | 3.731598                | 4.504097 | 1.053230  |
| 26            | 6             | 0           | 2.763341                | 4.218989 | -1.585897 |
| 27            | 1             | 0           | 2.160476                | 4.613118 | -2.408922 |
| 28            | 1             | 0           | 2.998374                | 3.172000 | -1.802011 |
| 29            | 1             | 0           | 3.703022                | 4.781319 | -1.548369 |
| 30            | 8             | 0           | -1.472522               | 3.975556 | 0.117160  |
| 31            | 6             | 0           | -2.450218               | 4.808931 | 0.097976  |
| 32            | 1             | 0           | -2.201288               | 5.850442 | -0.119331 |
| 33            | 1             | 0           | -3.824                  |          |           |

|     |    |   |           |           |           |     |    |   |           |           |           |
|-----|----|---|-----------|-----------|-----------|-----|----|---|-----------|-----------|-----------|
| 53  | 6  | 0 | -4.278903 | -1.041423 | -1.588464 | 152 | 1  | 0 | 7.334013  | 3.887627  | -2.856475 |
| 54  | 6  | 0 | -5.464868 | -0.949353 | 0.939195  | 153 | 6  | 0 | 8.373611  | 1.575080  | -1.719536 |
| 55  | 6  | 0 | -5.455206 | -0.312058 | -1.364494 | 154 | 1  | 0 | 9.140362  | 2.322271  | -1.958167 |
| 56  | 6  | 0 | -6.073761 | -0.261319 | -0.115639 | 155 | 1  | 0 | 8.708714  | 1.008336  | -0.843996 |
| 57  | 1  | 0 | -5.931884 | -0.909563 | 1.919963  | 156 | 1  | 0 | 8.307380  | 0.877557  | -2.563287 |
| 58  | 1  | 0 | -5.898384 | 0.221019  | -2.200178 | 157 | 6  | 0 | 6.022505  | -0.711669 | 2.877379  |
| 59  | 6  | 0 | 4.159497  | -0.807390 | -0.217466 | 158 | 1  | 0 | 6.816685  | 0.037210  | 2.775825  |
| 60  | 6  | 0 | 4.836036  | -0.015214 | 0.747875  | 159 | 1  | 0 | 5.893119  | -0.916852 | 3.946919  |
| 61  | 6  | 0 | 4.409957  | -0.590013 | -1.597066 | 160 | 1  | 0 | 6.376482  | -1.630453 | 2.396023  |
| 62  | 6  | 0 | 5.714932  | 0.980716  | 0.304306  | 161 | 6  | 0 | 4.213638  | 1.050162  | 2.993674  |
| 63  | 6  | 0 | 5.304339  | 0.416647  | -1.976664 | 162 | 1  | 0 | 4.105922  | 0.843378  | 4.065341  |
| 64  | 6  | 0 | 5.971874  | 1.216309  | -1.046884 | 163 | 1  | 0 | 4.920327  | 1.881285  | 2.888350  |
| 65  | 1  | 0 | 6.234030  | 1.587144  | 1.043478  | 164 | 1  | 0 | 3.243592  | 1.384784  | 2.617989  |
| 66  | 1  | 0 | 5.500560  | 0.560014  | -3.035376 |     |    |   |           |           |           |
| 67  | 7  | 0 | 0.342288  | 0.899838  | 0.730777  |     |    |   |           |           |           |
| 68  | 1  | 0 | 0.634838  | 1.849642  | 0.375315  |     |    |   |           |           |           |
| 69  | 16 | 0 | -0.357629 | 1.059770  | 2.245871  |     |    |   |           |           |           |
| 70  | 8  | 0 | 0.252164  | 2.248076  | 2.836884  |     |    |   |           |           |           |
| 71  | 8  | 0 | -1.803780 | 0.870930  | 2.244757  |     |    |   |           |           |           |
| 72  | 6  | 0 | 0.323435  | -0.412707 | 3.219446  |     |    |   |           |           |           |
| 73  | 9  | 0 | -0.478365 | -1.467508 | 3.109950  |     |    |   |           |           |           |
| 74  | 9  | 0 | 1.544625  | -0.739603 | 2.792371  |     |    |   |           |           |           |
| 75  | 9  | 0 | 0.386009  | -0.035645 | 4.495824  |     |    |   |           |           |           |
| 76  | 6  | 0 | -3.631755 | 4.576467  | 1.028314  |     |    |   |           |           |           |
| 77  | 6  | 0 | -4.124598 | 3.122135  | 1.031962  | 1   | 6  | 0 | -0.982648 | 3.035993  | 0.247060  |
| 78  | 1  | 0 | -4.892838 | 2.998891  | 1.803965  | 2   | 6  | 0 | -1.740266 | 1.911008  | 0.010165  |
| 79  | 1  | 0 | -4.573796 | 2.845000  | 0.073328  | 3   | 6  | 0 | -3.136339 | 1.832263  | 0.271468  |
| 80  | 1  | 0 | -3.316666 | 2.420513  | 1.247044  | 4   | 6  | 0 | -3.698874 | 2.871289  | 0.967280  |
| 81  | 6  | 0 | -4.778287 | 5.550634  | 0.706042  | 5   | 1  | 0 | -4.767122 | 2.854502  | 1.171942  |
| 82  | 1  | 0 | -5.286474 | 5.287818  | -0.226526 | 6   | 6  | 0 | 2.845994  | 3.494317  | -1.669498 |
| 83  | 1  | 0 | -5.523408 | 5.523718  | 1.508566  | 7   | 6  | 0 | 0.336293  | 3.216989  | -0.418665 |
| 84  | 1  | 0 | -4.419900 | 6.584220  | 0.621411  | 8   | 6  | 0 | 1.325469  | 2.267005  | -0.318176 |
| 85  | 6  | 0 | -3.063729 | 4.923447  | 2.437296  | 9   | 6  | 0 | 2.600165  | 2.363458  | -0.930036 |
| 86  | 1  | 0 | -2.258904 | 4.237064  | 2.714203  | 10  | 1  | 0 | 3.823158  | 3.620442  | -2.129717 |
| 87  | 1  | 0 | -2.675872 | 5.948382  | 2.476837  | 11  | 8  | 0 | -1.179812 | 0.811100  | -0.630283 |
| 88  | 1  | 0 | -3.866515 | 4.838431  | 3.178441  | 12  | 15 | 0 | 0.111376  | 0.004425  | -0.119901 |
| 89  | 6  | 0 | 3.631527  | -5.074376 | 2.251095  | 13  | 8  | 0 | 1.081590  | 1.139763  | 0.466117  |
| 90  | 1  | 0 | 4.682044  | -4.988722 | 2.518173  | 14  | 6  | 0 | -5.610678 | -1.319913 | -1.337227 |
| 91  | 6  | 0 | 0.923206  | -5.255564 | 1.560452  | 15  | 6  | 0 | -4.907187 | -0.449630 | -2.169330 |
| 92  | 1  | 0 | -0.130246 | -5.328563 | 1.316218  | 16  | 6  | 0 | -4.078496 | 0.553760  | -1.673852 |
| 93  | 6  | 0 | 0.561113  | -5.504951 | -1.621941 | 17  | 6  | 0 | -3.963800 | 0.712369  | -0.272808 |
| 94  | 1  | 0 | 1.585041  | -5.317480 | -1.322089 | 18  | 6  | 0 | -4.683753 | -0.138054 | 0.587752  |
| 95  | 6  | 0 | -2.063214 | -6.001089 | -2.464433 | 19  | 6  | 0 | -5.485677 | -1.143661 | 0.036067  |
| 96  | 1  | 0 | -3.084328 | -6.177153 | -2.793725 | 20  | 1  | 0 | -4.999311 | -0.575268 | -3.247790 |
| 97  | 6  | 0 | 2.868001  | -6.111798 | 2.733110  | 21  | 0  | 0 | -6.020747 | -1.806101 | 0.712098  |
| 98  | 1  | 0 | 3.309501  | -6.862110 | 3.383060  | 22  | 6  | 0 | 5.865791  | -0.422323 | -0.747940 |
| 99  | 6  | 0 | 1.497210  | -6.191647 | 2.392389  | 23  | 6  | 0 | 4.990069  | -0.417807 | -1.831472 |
| 100 | 1  | 0 | 0.889054  | -6.997405 | 2.794223  | 24  | 6  | 0 | 3.878526  | 0.425472  | -1.880443 |
| 101 | 6  | 0 | 0.266503  | -6.620858 | -2.373737 | 25  | 6  | 0 | 3.652972  | 1.305757  | -0.804795 |
| 102 | 1  | 0 | 1.063397  | -7.303993 | -2.654524 | 26  | 6  | 0 | 4.480095  | 1.268974  | 0.333667  |
| 103 | 6  | 0 | -1.059874 | -6.883208 | -2.789565 | 27  | 6  | 0 | 5.579691  | 0.409747  | 0.332718  |
| 104 | 1  | 0 | -1.278797 | -7.771822 | -3.375029 | 28  | 1  | 0 | 5.178620  | -1.086102 | -2.668874 |
| 105 | 6  | 0 | 3.824396  | -1.472142 | -2.701810 | 29  | 1  | 0 | 6.238502  | 0.384087  | 1.197050  |
| 106 | 1  | 0 | 3.127139  | -2.181205 | -2.250364 | 30  | 8  | 0 | 0.591033  | -0.891376 | -1.178852 |
| 107 | 6  | 0 | 4.698234  | -0.214436 | 2.268084  | 31  | 0  | 0 | 0.233998  | -1.832623 | 1.311906  |
| 108 | 1  | 0 | 3.948698  | -0.986660 | 2.440049  | 32  | 7  | 0 | -0.192646 | -0.842220 | 1.300919  |
| 109 | 6  | 0 | 7.011375  | 2.251575  | -1.459911 | 33  | 16 | 0 | -0.591728 | -0.244557 | 2.779680  |
| 110 | 1  | 0 | 7.141676  | 2.931485  | -0.606332 | 34  | 8  | 0 | -0.702037 | -1.389316 | 3.659322  |
| 111 | 6  | 0 | -3.754129 | -2.512828 | 1.948942  | 35  | 8  | 0 | -1.629337 | 0.755292  | 2.651889  |
| 112 | 1  | 0 | -2.692246 | -2.703232 | 1.765737  | 36  | 6  | 0 | 0.875056  | 0.713212  | 3.413186  |
| 113 | 6  | 0 | -7.406693 | 0.442463  | 0.119837  | 37  | 9  | 0 | 2.007323  | 0.144758  | 3.019210  |
| 114 | 1  | 0 | -7.413167 | 0.769841  | 1.169244  | 38  | 9  | 0 | 0.836450  | 1.967626  | 3.000053  |
| 115 | 6  | 0 | -3.683961 | -1.049504 | -2.997877 | 39  | 9  | 0 | 0.811339  | 0.686988  | 4.735183  |
| 116 | 1  | 0 | -2.710358 | -1.545892 | -2.953146 | 40  | 6  | 0 | 1.859270  | 4.491861  | -1.872569 |
| 117 | 6  | 0 | -3.839320 | -1.780654 | 3.299348  | 41  | 6  | 0 | 0.577509  | 4.349148  | -1.271315 |
| 118 | 1  | 0 | -3.304784 | -2.355552 | 4.064872  | 42  | 6  | 0 | -1.556274 | 4.059707  | 1.072579  |
| 119 | 1  | 0 | -3.388451 | -0.786787 | 3.239875  | 43  | 6  | 0 | -2.550222 | 3.962251  | 1.442563  |
| 120 | 1  | 0 | -4.874507 | -1.672788 | 3.644270  | 44  | 6  | 0 | -0.773985 | -5.068723 | 1.889761  |
| 121 | 6  | 0 | -4.459617 | -3.882939 | 2.031204  | 45  | 6  | 0 | -1.791962 | -4.066903 | 1.652895  |
| 122 | 1  | 0 | -4.341738 | -4.452911 | 1.103333  | 46  | 6  | 0 | -2.651142 | -4.086864 | 0.602372  |
| 123 | 1  | 0 | -4.047109 | -4.481611 | 2.852803  | 47  | 8  | 0 | 1.652133  | -5.426406 | 0.969263  |
| 124 | 1  | 0 | -5.533789 | -3.755539 | 2.212683  | 48  | 5  | 0 | 0.507109  | -4.600027 | 0.879042  |
| 125 | 6  | 0 | -8.573834 | -0.552355 | -0.055762 | 49  | 8  | 0 | -0.147999 | -4.692983 | -0.496138 |
| 126 | 1  | 0 | -8.616183 | -0.920370 | -1.088113 | 50  | 8  | 0 | 0.955595  | -3.215940 | 1.102136  |
| 127 | 1  | 0 | -8.458696 | -1.419997 | 0.602739  | 51  | 6  | 0 | -0.962591 | -3.777723 | -0.845377 |
| 128 | 1  | 0 | -9.533689 | -0.073287 | 0.173569  | 52  | 6  | 0 | 2.369437  | -3.247848 | 1.389978  |
| 129 | 6  | 0 | -7.630417 | 1.688041  | -0.751035 | 53  | 6  | 0 | 2.788611  | -4.597970 | 0.732242  |
| 130 | 1  | 0 | -8.556840 | 2.193772  | -0.455103 | 54  | 6  | 0 | 2.996167  | -4.449948 | -0.779187 |
| 131 | 1  | 0 | -6.807214 | 2.403311  | -0.651412 | 55  | 6  | 0 | 4.004838  | -5.251791 | 1.370982  |
| 132 | 1  | 0 | -7.728029 | 1.430519  | -1.812251 | 56  | 6  | 0 | 3.045945  | -2.025650 | 0.788326  |
| 133 | 6  | 0 | -3.428800 | 0.371488  | -3.535559 | 57  | 6  | 0 | 2.524507  | -3.263238 | 2.909748  |
| 134 | 1  | 0 | -2.948858 | 0.319405  | -4.518080 | 58  | 1  | 0 | -0.350155 | -5.041711 | 2.899804  |
| 135 | 1  | 0 | -4.359727 | 0.938975  | -3.651732 | 59  | 1  | 0 | -1.049840 | -6.082857 | 1.602691  |
| 136 | 1  | 0 | -2.761732 | 0.921122  | -2.865417 | 60  | 1  | 0 | -1.689048 | -3.145426 | 2.29602   |
| 137 | 6  | 0 | -4.569585 | -1.846516 | -3.976914 | 61  | 1  | 0 | -2.887818 | -5.026186 | 0.107907  |
| 138 | 1  | 0 | -4.714714 | -2.880282 | -3.643899 | 62  | 1  | 0 | -3.331902 | -3.254737 | 0.435380  |
| 139 | 1  | 0 | -5.561485 | -1.389246 | -4.076801 | 63  | 1  | 0 | -0.783644 | -2.764937 | -0.481281 |
| 140 | 1  | 0 | -4.111972 | -1.873317 | -4.973201 | 64  | 1  | 0 | 2.165146  | -3.903060 | -1.236536 |
| 141 | 6  | 0 | 3.032835  | -0.665188 | -3.747776 | 65  | 1  | 0 | 3.039530  | -5.448460 | -1.223361 |
| 142 | 1  | 0 | 2.215264  | -0.106932 | -3.282920 | 66  | 1  | 0 | 3.925618  | -3.918034 | -1.009464 |
| 143 | 1  | 0 | 3.674416  | 0.045711  | -4.282008 | 67  | 1  | 0 | 4.252375  | -6.169642 | 0.829957  |
| 144 | 1  | 0 | 2.599182  | -1.340914 | -4.494746 | 68  | 1  | 0 | 3.803700  | -5.513606 | 2.411894  |
| 145 | 6  | 0 | 4.930727  | -2.313255 | -3.372192 | 69  | 1  | 0 | 4.874233  | -4.585858 | 1.333432  |
| 146 | 1  | 0 | 5.666151  | -1.679273 | -3.881236 | 70  | 1  | 0 | 2.716023  | -1.110256 | 1.288571  |
| 147 | 1  | 0 | 5.468330  | -2.921901 | -2.636226 | 71  | 1  | 0 | 2.826282  | -1.920992 | -0.276129 |
| 148 | 1  | 0 | 4.496870  | -2.987485 | -4.120556 | 72  | 1  | 0 | 4.132171  | -2.090689 | 0.918356  |
| 149 | 6  | 0 | 6.590441  | 3.104382  | -2.667975 | 73  | 1  | 0 | 2.089512  | -4.174265 | 3.331500  |
| 150 | 1  | 0 | 6.513543  | 2.503616  | -3.581796 | 74  | 1  | 0 | 1.998013  | -2.403257 | 3.334649  |
| 151 | 1  | 0 | 5.621623  | 3.585643  | -2.501003 | 75  | 1  | 0 | 3.576745  | -3.203985 | 3.205745  |

**TS Re\_A (M06-2X)**

M06-2X/6-31g(d); E(RM062X) = -4246.641581 hartree

Sum of electronic and thermal Free Energies= -4245.358770 hartree

Thermal correction to Gibbs Free Energy= 1.282811 hartree

smd(toluene)/MN15/6-31g(d); E(RMN15) = -4243.889016 hartree

| Center Number | Atomic Number | Atomic Type | Coordinates (Angstroms) |          |          |
|---------------|---------------|-------------|-------------------------|----------|----------|
|               |               |             | X                       | Y        | Z        |
| 1             | 6             | 0           | -0.982648               | 3.035993 | 0.247060 |
| 2             | 6             | 0           | -1.740266               | 1.911008 | 0.010165 |
| 3             | 6             | 0           | -3.136339               | 1.832263 | 0.271468 |
| 4             | 6             | 0           | -3.698874               | 2.871289 |          |

|     |   |   |           |           |           |    |    |   |           |           |           |
|-----|---|---|-----------|-----------|-----------|----|----|---|-----------|-----------|-----------|
| 76  | 6 | 0 | -1.613860 | -3.881399 | -2.204792 | 1  | 5  | 0 | -3.221314 | 2.115913  | -0.539616 |
| 77  | 6 | 0 | -2.000207 | -5.314902 | -2.562316 | 2  | 6  | 0 | -2.065920 | 3.325055  | -0.410985 |
| 78  | 1 | 0 | -2.830463 | -5.674054 | -1.945823 | 3  | 6  | 0 | -2.383031 | 4.051570  | 0.807837  |
| 79  | 1 | 0 | -2.320920 | -5.356131 | -3.608187 | 4  | 6  | 0 | -1.995676 | 3.644640  | 2.049331  |
| 80  | 1 | 0 | -1.152720 | -5.992377 | -2.430757 | 5  | 1  | 0 | -2.195050 | 3.923381  | -1.316382 |
| 81  | 6 | 0 | -0.493286 | -3.392342 | -3.156338 | 6  | 1  | 0 | -1.074413 | 2.867750  | -0.382823 |
| 82  | 1 | 0 | -0.878822 | -3.381958 | -4.181380 | 7  | 1  | 0 | -3.120803 | 4.852921  | 0.735584  |
| 83  | 1 | 0 | -0.164070 | -2.382500 | -2.891659 | 8  | 1  | 0 | -2.299092 | 4.203656  | 2.929705  |
| 84  | 1 | 0 | 0.369995  | -4.063875 | -3.113066 | 9  | 1  | 0 | -1.189061 | 2.920742  | 2.149770  |
| 85  | 6 | 0 | -2.799982 | -2.924633 | -2.304543 | 10 | 8  | 0 | -4.550952 | 2.636058  | -0.683138 |
| 86  | 1 | 0 | -2.561891 | -1.945937 | -1.869322 | 11 | 6  | 0 | -5.261179 | 1.707954  | -1.502804 |
| 87  | 1 | 0 | -3.069427 | -2.763645 | -3.354524 | 12 | 8  | 0 | -3.004562 | 1.149943  | -1.594716 |
| 88  | 1 | 0 | -3.681827 | -3.316449 | -1.788978 | 13 | 6  | 0 | -4.144505 | 1.206723  | -2.469491 |
| 89  | 6 | 0 | 4.214821  | 2.174296  | 1.528363  | 14 | 6  | 0 | -5.798471 | 0.571799  | -0.624407 |
| 90  | 1 | 0 | 3.128428  | 2.300262  | 1.614908  | 15 | 1  | 0 | -4.974764 | -0.018114 | -0.208293 |
| 91  | 6 | 0 | 2.961450  | 0.379639  | -3.094917 | 16 | 1  | 0 | -6.371035 | 1.005080  | 0.202966  |
| 92  | 1 | 0 | 2.007427  | 0.840274  | -2.816135 | 17 | 1  | 0 | -6.457201 | -0.098965 | -1.186193 |
| 93  | 6 | 0 | 7.100036  | -1.304686 | -0.744183 | 18 | 6  | 0 | -6.412079 | 2.434693  | -2.182229 |
| 94  | 1 | 0 | 7.600459  | -1.163194 | 0.222439  | 19 | 1  | 0 | -7.156531 | 2.724501  | -1.434271 |
| 95  | 6 | 0 | -3.371046 | 1.451260  | -2.682082 | 20 | 1  | 0 | -7.059953 | 3.339945  | -2.680656 |
| 96  | 1 | 0 | -2.764671 | 2.185831  | -2.145432 | 21 | 1  | 0 | -6.901373 | 1.789467  | -2.920295 |
| 97  | 6 | 0 | -4.604822 | -0.047055 | 2.103632  | 22 | 6  | 0 | -4.398413 | -0.168208 | -3.068083 |
| 98  | 1 | 0 | -3.926629 | 0.763959  | 2.370306  | 23 | 1  | 0 | -4.450481 | -0.933718 | -2.288069 |
| 99  | 6 | 0 | -6.501159 | -2.385351 | -1.950359 | 24 | 1  | 0 | -3.587572 | -0.424523 | -3.755598 |
| 100 | 1 | 0 | -6.019831 | -2.703072 | -2.885807 | 25 | 1  | 0 | -5.341333 | -0.172921 | -3.627025 |
| 101 | 6 | 0 | -6.675015 | -3.622721 | -1.068345 | 26 | 6  | 0 | -3.853043 | 2.220937  | -3.575690 |
| 102 | 1 | 0 | -7.205788 | -4.405736 | -1.618131 | 27 | 1  | 0 | -3.740410 | 3.224951  | -3.155331 |
| 103 | 1 | 0 | -5.711233 | -4.027248 | -0.739578 | 28 | 1  | 0 | -2.923004 | 1.940430  | -4.074515 |
| 104 | 1 | 0 | -7.266046 | -3.394231 | -0.174981 | 29 | 1  | 0 | -4.659126 | 2.242134  | -4.316590 |
| 105 | 6 | 0 | -7.868644 | -1.785049 | -2.305559 | 30 | 8  | 0 | -3.078605 | 1.351257  | 0.796283  |
| 106 | 1 | 0 | -8.373966 | -1.438422 | -1.397366 | 31 | 6  | 0 | -3.538572 | 1.922349  | 1.828684  |
| 107 | 1 | 0 | -7.761620 | -0.928735 | -2.978018 | 32 | 1  | 0 | -4.358615 | 2.633850  | 1.686977  |
| 108 | 1 | 0 | -8.507955 | -2.529773 | -2.791126 | 33 | 8  | 0 | 0.551669  | -1.227740 | 0.742043  |
| 109 | 6 | 0 | -4.392061 | 2.241656  | -3.511315 | 34 | 15 | 0 | 0.411068  | 0.224927  | 0.056472  |
| 110 | 1 | 0 | -5.017138 | 1.572495  | -4.112354 | 35 | 8  | 0 | 1.848931  | 0.435248  | -0.625998 |
| 111 | 1 | 0 | -5.052016 | 2.828783  | -2.865408 | 36 | 8  | 0 | -0.094436 | 1.194808  | 1.030327  |
| 112 | 1 | 0 | -3.879236 | 2.925717  | -4.195324 | 37 | 6  | 0 | -2.296572 | -2.296572 | 0.080444  |
| 113 | 6 | 0 | -2.429404 | 0.652076  | -3.591912 | 38 | 6  | 0 | 2.492455  | -2.258855 | -0.211176 |
| 114 | 1 | 0 | -1.675934 | 0.112970  | -3.009803 | 39 | 6  | 0 | 0.321190  | -3.444133 | -0.130052 |
| 115 | 1 | 0 | -2.986012 | -0.076062 | -4.193186 | 40 | 6  | 0 | 3.036508  | -3.335228 | -0.988924 |
| 116 | 1 | 0 | -1.911543 | 1.326158  | -4.282411 | 41 | 6  | 0 | 0.899149  | -4.520631 | -0.754110 |
| 117 | 6 | 0 | -5.972849 | 0.252359  | 2.726375  | 42 | 6  | 0 | 2.228916  | -4.475350 | -1.249986 |
| 118 | 1 | 0 | -6.692177 | -0.546567 | 2.515486  | 43 | 1  | 0 | 0.330103  | -5.438412 | -0.875698 |
| 119 | 1 | 0 | -5.882817 | 0.342228  | 3.813743  | 44 | 6  | 0 | 2.983076  | 0.157883  | 0.141771  |
| 120 | 1 | 0 | -6.392088 | 1.186717  | 2.338533  | 45 | 6  | 0 | 3.345630  | -1.157145 | 0.314900  |
| 121 | 6 | 0 | -4.005416 | -1.333240 | 2.680126  | 46 | 6  | 0 | 3.676790  | 1.269091  | 0.700507  |
| 122 | 1 | 0 | -3.070853 | -1.570907 | 2.164134  | 47 | 6  | 0 | 4.507996  | -1.428440 | 1.119389  |
| 123 | 1 | 0 | -3.783328 | -1.220258 | 3.745926  | 48 | 6  | 0 | 4.843634  | 0.997075  | 1.366132  |
| 124 | 1 | 0 | -4.680765 | -2.188322 | 2.556691  | 49 | 6  | 0 | 5.283575  | -0.333275 | 1.594645  |
| 125 | 6 | 0 | 3.558234  | 1.174184  | -4.264093 | 50 | 1  | 0 | 5.423260  | 1.817781  | 1.782406  |
| 126 | 1 | 0 | 2.902321  | 1.119643  | -5.139322 | 51 | 6  | 0 | 3.028117  | 2.613340  | 0.644455  |
| 127 | 1 | 0 | 3.698148  | 2.228596  | -0.08867  | 52 | 6  | 0 | 2.406611  | 3.121387  | 1.806559  |
| 128 | 1 | 0 | 4.534511  | 0.762241  | -4.544375 | 53 | 6  | 0 | 2.930716  | 3.293433  | -0.582442 |
| 129 | 6 | 0 | 2.655764  | -1.056218 | -3.537414 | 54 | 6  | 0 | 1.603419  | 4.252789  | 1.668757  |
| 130 | 1 | 0 | 1.857803  | -1.047994 | -4.287606 | 55 | 6  | 0 | 1.222414  | 4.426963  | -0.662627 |
| 131 | 1 | 0 | 3.529795  | -1.532494 | -3.995454 | 56 | 6  | 0 | 1.424033  | 4.899521  | 0.445522  |
| 132 | 1 | 0 | 2.321531  | -1.664368 | -2.693353 | 57 | 1  | 0 | 1.087660  | 4.655598  | 2.536697  |
| 133 | 6 | 0 | 8.076868  | -0.882339 | -1.848117 | 58 | 1  | 0 | 2.021629  | 4.935760  | -1.615154 |
| 134 | 1 | 0 | 7.623805  | -1.017905 | -2.836400 | 59 | 6  | 0 | -1.067046 | -3.463290 | 0.428815  |
| 135 | 1 | 0 | 8.354065  | 0.170975  | -1.747349 | 60 | 6  | 0 | -2.200870 | -3.628884 | -0.400243 |
| 136 | 1 | 0 | 8.988998  | -1.486838 | -1.810340 | 61 | 6  | 0 | -1.225887 | -3.313470 | 1.823381  |
| 137 | 6 | 0 | 6.743822  | -2.788627 | -0.877741 | 62 | 6  | 0 | -3.467894 | -3.553293 | 0.184012  |
| 138 | 1 | 0 | 6.066450  | -3.106356 | -0.078911 | 63 | 6  | 0 | -2.514977 | -3.250731 | 2.352625  |
| 139 | 1 | 0 | 6.250056  | -2.989065 | -1.835163 | 64 | 6  | 0 | -3.649144 | -3.355781 | 1.552577  |
| 140 | 1 | 0 | 7.644973  | -3.408684 | -0.830448 | 65 | 1  | 0 | -4.343349 | -3.670945 | -0.444714 |
| 141 | 6 | 0 | 4.843354  | 3.559216  | 1.317174  | 66 | 1  | 0 | -2.642056 | -3.139961 | 3.429356  |
| 142 | 1 | 0 | 5.928397  | 3.461849  | 1.199524  | 67 | 7  | 0 | -0.484253 | 0.020715  | -1.360745 |
| 143 | 1 | 0 | 4.446974  | 4.052971  | 0.426051  | 68 | 1  | 0 | -1.519197 | 0.113891  | -1.267927 |
| 144 | 1 | 0 | 4.650510  | 4.204252  | 2.181072  | 69 | 16 | 0 | -0.105110 | 0.709234  | -2.835543 |
| 145 | 6 | 0 | 4.711124  | 1.582742  | 2.851883  | 70 | 8  | 0 | -1.167028 | 0.331042  | -3.742240 |
| 146 | 1 | 0 | 4.420336  | 0.534791  | 2.963724  | 71 | 8  | 0 | 0.344872  | 2.077401  | -2.699803 |
| 147 | 1 | 0 | 5.801927  | 1.644255  | 2.930953  | 72 | 6  | 0 | 1.380573  | -0.270689 | -3.427119 |
| 148 | 1 | 0 | 4.293085  | 2.148244  | 3.690826  | 73 | 9  | 0 | 1.497810  | -1.422513 | -2.785393 |
| 149 | 6 | 0 | 2.124671  | 5.614227  | -2.700789 | 74 | 9  | 0 | 2.488043  | 0.434269  | -3.282582 |
| 150 | 1 | 0 | 3.114123  | 5.709554  | -3.139912 | 75 | 9  | 0 | 1.182866  | -0.506125 | -4.714027 |
| 151 | 6 | 0 | -0.419378 | 5.315299  | -1.579230 | 76 | 6  | 0 | -3.484473 | 1.196584  | 3.150484  |
| 152 | 1 | 0 | -1.417335 | 5.200157  | -1.172803 | 77 | 6  | 0 | -2.197683 | 0.399680  | 3.325189  |
| 153 | 6 | 0 | -0.137374 | 6.380365  | -2.396538 | 78 | 1  | 0 | -1.326547 | 1.056379  | 3.389529  |
| 154 | 1 | 0 | -0.915660 | 7.102079  | -2.623434 | 79 | 1  | 0 | -2.259466 | -0.187604 | 4.247814  |
| 155 | 6 | 0 | 1.152152  | 6.544533  | -2.953771 | 80 | 1  | 0 | -2.039798 | -0.285024 | 2.486921  |
| 156 | 1 | 0 | 1.360979  | 7.397010  | -3.592133 | 81 | 6  | 0 | -4.671394 | 0.208018  | 3.044440  |
| 157 | 6 | 0 | -0.797359 | 5.158598  | 1.553709  | 82 | 1  | 0 | -4.755933 | -0.347509 | 3.984798  |
| 158 | 1 | 0 | 0.254928  | 5.226269  | 1.296486  | 83 | 1  | 0 | -5.622207 | 0.722499  | 2.864331  |
| 159 | 6 | 0 | -3.498905 | 4.975051  | 2.253655  | 84 | 1  | 0 | -4.959994 | -0.504336 | 2.231975  |
| 160 | 1 | 0 | -4.548478 | 4.890725  | 2.522278  | 85 | 6  | 0 | -3.723156 | 2.148682  | 4.323188  |
| 161 | 6 | 0 | -2.744036 | 6.028619  | 2.699897  | 86 | 1  | 0 | -4.566841 | 2.821433  | 4.129521  |
| 162 | 1 | 0 | -3.189448 | 6.793996  | 3.327308  | 87 | 1  | 0 | -3.953792 | 1.571668  | 5.224145  |
| 163 | 6 | 0 | -1.376164 | 6.113881  | 2.350977  | 88 | 1  | 0 | -2.837173 | 2.753908  | 4.530540  |
| 164 | 1 | 0 | -0.777923 | 6.940110  | 2.721944  | 89 | 6  | 0 | 2.770662  | -5.554648 | -1.995617 |
|     |   |   |           |           |           | 90 | 1  | 0 | 2.145402  | -6.425024 | -2.175832 |
|     |   |   |           |           |           | 91 | 6  | 0 | 4.348416  | -3.293454 | -1.530420 |
|     |   |   |           |           |           | 92 | 1  | 0 | 4.959361  | -2.412031 | -1.364961 |
|     |   |   |           |           |           | 93 | 6  | 0 | 4.900678  | -2.741220 | 1.496997  |
|     |   |   |           |           |           | 94 | 1  | 0 | 4.294093  | -3.586603 | 1.194152  |
|     |   |   |           |           |           | 95 | 6  | 0 | 6.454660  | -0.584179 | 2.356571  |
|     |   |   |           |           |           | 96 | 1  | 0 | 7.039972  | 0.265494  | 2.697705  |
|     |   |   |           |           |           | 97 | 6  | 0 | 4.046181  | -5.493627 | -2.493409 |
|     |   |   |           |           |           | 98 | 1  | 0 | 4.448237  | -6.319737 | -3.071126 |

TS Re\_E (M06-2X)

M06-2X/6-31g(d); E(RM062X) = -4246.622898 hartree  
Sum of electronic and thermal Free Energies = -4245.336090 hartree  
Thermal correction to Gibbs Free Energy = 1.286808 hartree  
smd (toluene)/MN15/6-31g(d); E(RMN15) = -4243.871348 hartree

| Center Number | Atomic Number | Atomic Type | Coordinates (Angstroms) |   |   |
|---------------|---------------|-------------|-------------------------|---|---|
|               |               |             | X                       | Y | Z |
|               |               |             | 97                      |   |   |
|               |               |             | 98                      |   |   |

|     |   |   |           |           |           |     |    |   |           |           |           |
|-----|---|---|-----------|-----------|-----------|-----|----|---|-----------|-----------|-----------|
| 99  | 6 | 0 | 4.837080  | -4.343275 | -2.266617 | 23  | 1  | 0 | 5.276743  | -5.255405 | -1.704063 |
| 100 | 1 | 0 | 5.838088  | -4.289149 | -2.682656 | 24  | 1  | 0 | 5.891746  | -3.653710 | -1.253489 |
| 101 | 6 | 0 | 6.028683  | -2.950771 | 2.249921  | 25  | 6  | 0 | 3.559579  | -3.546516 | -2.818391 |
| 102 | 1 | 0 | 6.305869  | -3.962187 | 2.529824  | 26  | 1  | 0 | 2.589543  | -3.087572 | -3.029172 |
| 103 | 6 | 0 | 6.828000  | -1.863942 | 2.671897  | 27  | 1  | 0 | 3.610507  | -4.504656 | -3.343241 |
| 104 | 1 | 0 | 7.722263  | -2.045578 | 3.259416  | 28  | 1  | 0 | 4.346820  | -2.892727 | -3.208503 |
| 105 | 6 | 0 | 2.629183  | 2.493213  | 3.184719  | 29  | 8  | 0 | 1.435808  | -4.614173 | 1.058152  |
| 106 | 1 | 0 | 3.699237  | 2.269238  | 3.263842  | 30  | 6  | 0 | 0.662990  | -4.003656 | 1.858613  |
| 107 | 6 | 0 | 3.779347  | 2.846674  | -1.763719 | 31  | 1  | 0 | 0.496092  | -2.929103 | 1.721397  |
| 108 | 1 | 0 | 3.736547  | 1.753227  | -1.815256 | 32  | 1  | 0 | -5.681311 | 1.407474  | 1.342624  |
| 109 | 6 | 0 | 0.543459  | 6.134579  | 0.386981  | 33  | 6  | 0 | -4.665208 | 1.767225  | 1.198330  |
| 110 | 1 | 0 | -0.308789 | 5.945181  | 1.053572  | 34  | 6  | 0 | -3.787132 | 1.009164  | 0.464632  |
| 111 | 6 | 0 | -0.050017 | -3.351966 | 2.794255  | 35  | 6  | 0 | -4.270347 | 2.971698  | 1.834351  |
| 112 | 1 | 0 | 0.883450  | -3.337091 | 2.226386  | 36  | 6  | 0 | -2.481295 | 1.538116  | 0.285147  |
| 113 | 6 | 0 | -2.077471 | -3.907785 | -1.899321 | 37  | 6  | 0 | -2.941472 | 3.451869  | 1.671334  |
| 114 | 1 | 0 | -1.320138 | -4.688260 | -2.027705 | 38  | 6  | 0 | -2.048526 | 2.737702  | 0.800539  |
| 115 | 6 | 0 | -5.022752 | -3.385366 | 2.199969  | 39  | 8  | 0 | -1.585651 | 0.787069  | -0.486125 |
| 116 | 1 | 0 | -4.969843 | -2.755253 | 3.097948  | 40  | 6  | 0 | -0.705301 | 3.276260  | 0.454247  |
| 117 | 6 | 0 | 1.873078  | 1.175780  | 3.402189  | 41  | 15 | 0 | -0.432538 | 0.021854  | 0.326653  |
| 118 | 1 | 0 | 0.796338  | 1.339891  | 3.315676  | 42  | 6  | 0 | 0.445152  | 2.524611  | 0.604824  |
| 119 | 1 | 0 | 2.144866  | 0.405296  | 2.674644  | 43  | 6  | 0 | -0.584732 | 4.610088  | -0.065734 |
| 120 | 1 | 0 | 2.092160  | 0.783616  | 4.401782  | 44  | 8  | 0 | 0.368436  | 1.212854  | 1.052953  |
| 121 | 6 | 0 | 2.298099  | 3.449024  | 4.334817  | 45  | 8  | 0 | -0.777099 | -1.010773 | 1.315787  |
| 122 | 1 | 0 | 2.632943  | 3.013921  | 5.281298  | 46  | 6  | 0 | 1.752967  | 3.056289  | 0.419652  |
| 123 | 1 | 0 | 2.784619  | 4.421293  | 4.211358  | 47  | 6  | 0 | 0.709217  | 5.176794  | -0.210643 |
| 124 | 1 | 0 | 1.217822  | 3.614676  | 4.416376  | 48  | 6  | 0 | 1.844318  | 4.385267  | 0.078969  |
| 125 | 6 | 0 | -0.006644 | 6.428862  | -1.008510 | 49  | 1  | 0 | 2.831877  | 4.828919  | -0.029523 |
| 126 | 1 | 0 | 0.784759  | 6.778255  | -1.681204 | 50  | 7  | 0 | 0.496436  | -0.524083 | -0.961894 |
| 127 | 1 | 0 | -0.462076 | 5.539256  | -1.453334 | 51  | 1  | 0 | 1.138639  | -0.353274 | -0.724153 |
| 128 | 1 | 0 | -0.762118 | 7.219291  | -0.956943 | 52  | 16 | 0 | -0.020658 | -0.659435 | -2.525995 |
| 129 | 6 | 0 | 1.306623  | 7.351715  | 0.928810  | 53  | 8  | 0 | 1.078175  | -1.251290 | -3.261477 |
| 130 | 1 | 0 | 0.668820  | 8.242227  | 0.931991  | 54  | 8  | 0 | -1.363054 | -1.190598 | -2.629446 |
| 131 | 1 | 0 | 1.661690  | 7.177229  | 1.949110  | 55  | 6  | 0 | -0.116398 | 1.129426  | -3.082634 |
| 132 | 1 | 0 | 2.179919  | 7.558336  | 0.299958  | 56  | 9  | 0 | 0.504284  | 1.216646  | -4.247125 |
| 133 | 6 | 0 | 3.322557  | 3.394574  | -3.115735 | 57  | 9  | 0 | 0.475009  | 1.934468  | -2.209208 |
| 134 | 1 | 0 | 3.898583  | 2.919114  | -3.916150 | 58  | 9  | 0 | -1.377724 | 1.490779  | -3.228691 |
| 135 | 1 | 0 | 2.262168  | 3.204940  | -3.292143 | 59  | 6  | 0 | 3.014589  | 2.262458  | 0.539514  |
| 136 | 1 | 0 | 3.502390  | 4.473694  | -3.183386 | 60  | 6  | 0 | 3.386212  | 1.647670  | 1.752161  |
| 137 | 6 | 0 | 5.242903  | 3.248342  | -1.518622 | 61  | 6  | 0 | 3.912365  | 2.247524  | -0.557337 |
| 138 | 1 | 0 | 5.636480  | 2.806475  | -0.598869 | 62  | 6  | 0 | 4.645189  | 1.046811  | 1.846744  |
| 139 | 1 | 0 | 5.874855  | 2.924270  | -2.352503 | 63  | 6  | 0 | 5.172534  | 1.674017  | -0.390060 |
| 140 | 1 | 0 | 5.322050  | 4.337755  | -1.432936 | 64  | 6  | 0 | 5.565154  | 1.071484  | 0.803620  |
| 141 | 6 | 0 | -0.012260 | -2.163232 | 3.757830  | 65  | 1  | 0 | 4.936194  | 0.580449  | 2.786501  |
| 142 | 1 | 0 | 0.015703  | -1.214538 | 3.214551  | 66  | 1  | 0 | 5.864327  | 1.685137  | -1.230431 |
| 143 | 1 | 0 | -0.884175 | -2.158834 | 4.421567  | 67  | 6  | 0 | -4.122039 | -0.350342 | -0.054000 |
| 144 | 1 | 0 | 0.880930  | -2.224442 | 4.388916  | 68  | 6  | 0 | -4.250978 | -0.573706 | -1.441688 |
| 145 | 6 | 0 | -0.075646 | -4.678776 | 3.567333  | 69  | 6  | 0 | -4.248271 | -1.413797 | 0.857053  |
| 146 | 1 | 0 | -0.060530 | -5.532318 | 2.882366  | 70  | 6  | 0 | -4.626884 | -1.876943 | -1.894432 |
| 147 | 1 | 0 | 0.791807  | -4.751733 | 4.231633  | 71  | 6  | 0 | -4.432701 | -2.703561 | 0.349821  |
| 148 | 1 | 0 | -0.979980 | -4.755786 | 4.181058  | 72  | 6  | 0 | -4.486099 | -2.960446 | -1.015225 |
| 149 | 6 | 0 | -6.145034 | -2.847335 | 1.310931  | 73  | 1  | 0 | -4.495381 | -2.060636 | -2.962201 |
| 150 | 1 | 0 | -5.912136 | -1.854482 | 0.913984  | 74  | 1  | 0 | -4.523022 | -3.539653 | 1.040730  |
| 151 | 1 | 0 | -6.334376 | -3.514087 | 0.462604  | 75  | 6  | 0 | 0.553263  | -4.552854 | 3.265422  |
| 152 | 1 | 0 | -0.775701 | -2.778217 | 1.882713  | 76  | 6  | 0 | 1.899478  | -4.118527 | 3.900320  |
| 153 | 6 | 0 | -5.345040 | -4.816789 | 2.653816  | 77  | 1  | 0 | 2.738433  | -4.616310 | 3.406662  |
| 154 | 1 | 0 | -6.313273 | -4.855547 | 3.164112  | 78  | 1  | 0 | 2.045782  | -3.034619 | 3.828889  |
| 155 | 1 | 0 | -5.387186 | -5.485343 | 1.786754  | 79  | 1  | 0 | 1.898666  | -4.393343 | 4.959941  |
| 156 | 1 | 0 | -4.577828 | -5.197721 | 3.334511  | 80  | 6  | 0 | -0.586163 | -3.900223 | 4.040357  |
| 157 | 6 | 0 | -1.600804 | -2.674611 | -2.670068 | 81  | 1  | 0 | -1.560916 | -4.242959 | 3.684066  |
| 158 | 1 | 0 | -0.607219 | -2.362752 | -2.347400 | 82  | 1  | 0 | -0.504267 | -4.159289 | 5.101001  |
| 159 | 1 | 0 | -1.563627 | -2.880318 | -3.745493 | 83  | 1  | 0 | -0.550625 | -2.808754 | 3.951187  |
| 160 | 1 | 0 | -2.285643 | -1.836370 | -2.512621 | 84  | 6  | 0 | 0.456129  | -6.077710 | 3.292221  |
| 161 | 6 | 0 | -3.363838 | -4.441644 | -2.534486 | 85  | 1  | 0 | 0.601309  | -6.436334 | 4.316302  |
| 162 | 1 | 0 | -3.768643 | -5.299638 | -1.988818 | 86  | 1  | 0 | -0.528604 | -6.416478 | 2.957139  |
| 163 | 1 | 0 | -4.137943 | -3.667668 | -2.584777 | 87  | 1  | 0 | 1.218427  | -6.529953 | 2.652831  |
| 164 | 1 | 0 | -3.155345 | -4.756601 | -3.561070 | 88  | 6  | 0 | -4.280055 | 0.601287  | -2.408240 |
|     |   |   |           |           |           | 89  | 1  | 0 | -3.492029 | 1.302481  | -2.110308 |
|     |   |   |           |           |           | 90  | 6  | 0 | -4.236999 | -1.208967 | 2.365314  |
|     |   |   |           |           |           | 91  | 1  | 0 | -3.844429 | -0.210983 | 2.577520  |
|     |   |   |           |           |           | 92  | 6  | 0 | -4.636032 | -4.379032 | -1.529348 |
|     |   |   |           |           |           | 93  | 1  | 0 | -4.440889 | -5.050877 | -0.682838 |
|     |   |   |           |           |           | 94  | 6  | 0 | 2.524831  | 1.685332  | 3.007035  |
|     |   |   |           |           |           | 95  | 1  | 0 | 1.596421  | 2.215227  | 2.784239  |
|     |   |   |           |           |           | 96  | 6  | 0 | 3.566478  | 2.790657  | -1.941234 |
|     |   |   |           |           |           | 97  | 1  | 0 | 2.562308  | 3.216036  | -1.915149 |
|     |   |   |           |           |           | 98  | 6  | 0 | 6.969610  | 0.528107  | 0.993184  |
|     |   |   |           |           |           | 99  | 1  | 0 | 6.987268  | -0.000630 | 1.955072  |
|     |   |   |           |           |           | 100 | 6  | 0 | 3.390699  | -2.564785 | -0.447873 |
|     |   |   |           |           |           | 101 | 6  | 0 | -3.325123 | -2.199265 | 3.087038  |
|     |   |   |           |           |           | 102 | 1  | 0 | -3.256865 | -1.947671 | 4.151437  |
|     |   |   |           |           |           | 103 | 1  | 0 | -3.706449 | -3.225738 | 3.021205  |
|     |   |   |           |           |           | 104 | 1  | 0 | -2.323072 | -2.160445 | 2.655585  |
|     |   |   |           |           |           | 105 | 6  | 0 | -5.666105 | -1.289566 | 2.918436  |
|     |   |   |           |           |           | 106 | 1  | 0 | -5.673501 | -1.107622 | 3.998438  |
|     |   |   |           |           |           | 107 | 1  | 0 | -6.327747 | -0.560342 | 2.440578  |
|     |   |   |           |           |           | 108 | 1  | 0 | -6.088618 | -2.284650 | 2.738135  |
|     |   |   |           |           |           | 109 | 6  | 0 | -6.067367 | -4.629869 | -2.019669 |
|     |   |   |           |           |           | 110 | 1  | 0 | -6.187158 | -5.664193 | -2.358987 |
|     |   |   |           |           |           | 111 | 1  | 0 | -6.796474 | -4.437655 | -1.226801 |
|     |   |   |           |           |           | 112 | 1  | 0 | -6.302842 | -3.968124 | -2.860847 |
|     |   |   |           |           |           | 113 | 6  | 0 | -3.620351 | -4.703634 | -2.629263 |
|     |   |   |           |           |           | 114 | 1  | 0 | -3.815021 | -4.117371 | -3.533560 |
|     |   |   |           |           |           | 115 | 1  | 0 | -2.598964 | -4.485963 | -2.303186 |
|     |   |   |           |           |           | 116 | 1  | 0 | -3.680874 | -5.762217 | -2.902185 |
|     |   |   |           |           |           | 117 | 6  | 0 | -5.630518 | 1.327472  | -2.297181 |
|     |   |   |           |           |           | 118 | 1  | 0 | -5.661573 | 2.185445  | -2.977309 |
|     |   |   |           |           |           | 119 | 1  | 0 | -6.443380 | 0.645658  | -2.570579 |
|     |   |   |           |           |           | 120 | 1  | 0 | -5.817577 | 1.688796  | -1.282314 |
|     |   |   |           |           |           | 121 | 6  | 0 | -4.031209 | 0.220671  | -3.868420 |

TS Si\_A (M06-2X)

M06-2X/6-31g(d); E(RM062X) = -4246.634493 hartree  
Sum of electronic and thermal Free Energies= -4245.351055 hartree  
Thermal correction to Gibbs Free Energy= 1.283437 hartree  
smd(toluene)/MN15/6-31g(d); E(RMN15) = -4243.883554 hartree

| Center Number | Atomic Number | Atomic Type | Coordinates (Angstroms) |           |           |
|---------------|---------------|-------------|-------------------------|-----------|-----------|
|               |               |             | X                       | Y         | Z         |
| 1             | 5             | 0           | 1.626370                | -4.085428 | -0.371890 |
| 2             | 6             | 0           | 0.141725                | -4.389604 | -1.094512 |
| 3             | 6             | 0           | -0.918795               | -3.873411 | -0.237913 |
| 4             | 6             | 0           | -1.359197               | -4.514543 | 0.879945  |
| 5             | 1             | 0           | 0.177886                | -3.906613 | -2.076308 |
| 6             | 1             | 0           | 0.100130                | -5.476014 | -1.213991 |
| 7             | 1             | 0           | -1.272016               | -2.853286 | -0.399612 |
| 8             | 1             | 0           | -2.125007               | -4.065027 | 1.502638  |
| 9             | 1             | 0           | -1.144946               | -5.570596 | 1.025506  |
| 10            | 8             | 0           | 1.955144                | -2.658257 | -0.334743 |
| 11            | 8             | 0           | 2.740650                | -4.763976 | -0.933617 |
| 12            | 6             | 0           | 3.726690                | -3.814981 | -1.321702 |
| 13            | 6             | 0           | 3.972197                | -2.641116 | 0.964466  |
| 14            | 1             | 0           | 3.766303                | -3.613496 | 1.421738  |
| 15            | 1             | 0           | 3.511411                | -1.856099 | 1.574870  |
| 16            | 1             | 0           | 5.055101                | -2.478328 | 0.962725  |
| 17            | 6             | 0           | 3.725064                | -1.233196 | -1.089079 |

|     |   |   |           |           |           |     |    |   |           |           |           |
|-----|---|---|-----------|-----------|-----------|-----|----|---|-----------|-----------|-----------|
| 122 | 1 | 0 | -3.124728 | -0.377693 | -3.980274 | 46  | 8  | 0 | -0.736822 | 0.561151  | -1.599943 |
| 123 | 1 | 0 | -4.876915 | -0.344022 | -4.277074 | 47  | 6  | 0 | 2.859593  | -2.363387 | -0.038862 |
| 124 | 1 | 0 | -3.926174 | 1.128851  | -4.470427 | 48  | 6  | 0 | 2.423091  | -4.571215 | 0.920297  |
| 125 | 6 | 0 | 3.228168  | 2.469030  | 4.123800  | 49  | 6  | 0 | 3.300178  | -3.524646 | 0.550965  |
| 126 | 1 | 0 | 4.152914  | 1.973404  | 4.437527  | 50  | 1  | 0 | 4.358666  | -3.624052 | 0.780591  |
| 127 | 1 | 0 | 3.483941  | 3.479984  | 3.792145  | 51  | 6  | 0 | -3.896084 | -0.982547 | -0.258241 |
| 128 | 1 | 0 | 2.576454  | 2.547880  | 5.000056  | 52  | 6  | 0 | -4.562672 | -0.873226 | 1.068193  |
| 129 | 6 | 0 | 2.155613  | 0.274630  | 3.481344  | 53  | 6  | 0 | -4.422861 | -0.151571 | -1.265542 |
| 130 | 1 | 0 | 1.623841  | -0.280349 | 2.702023  | 54  | 6  | 0 | -5.401032 | 0.010964  | 1.341229  |
| 131 | 1 | 0 | 3.052271  | -0.291528 | 3.760597  | 55  | 6  | 0 | -5.479245 | 0.702382  | -0.944348 |
| 132 | 1 | 0 | 1.506643  | 0.327364  | 4.361930  | 56  | 6  | 0 | -5.999383 | 0.781062  | 0.345204  |
| 133 | 6 | 0 | 7.971471  | 1.688013  | 1.072028  | 57  | 1  | 0 | -5.782276 | 0.086914  | 2.356332  |
| 134 | 1 | 0 | 7.697886  | 2.391216  | 1.863950  | 58  | 1  | 0 | -5.909605 | 1.319894  | -1.731302 |
| 135 | 1 | 0 | 8.982029  | 1.316026  | 1.270125  | 59  | 6  | 0 | 3.837880  | -1.264851 | -0.298004 |
| 136 | 1 | 0 | 7.992543  | 2.239474  | 0.125280  | 60  | 6  | 0 | 4.578013  | -0.732035 | 0.784844  |
| 137 | 6 | 0 | 7.387083  | -0.464579 | -0.095652 | 61  | 6  | 0 | 4.114680  | -0.836997 | -1.610049 |
| 138 | 1 | 0 | 6.727119  | -1.336557 | -0.117632 | 62  | 6  | 0 | 5.582233  | 0.195158  | 0.516539  |
| 139 | 1 | 0 | 7.366541  | 0.000143  | -1.087617 | 63  | 6  | 0 | 5.128211  | 0.103576  | -1.819588 |
| 140 | 1 | 0 | 8.408215  | -0.816498 | 0.083008  | 64  | 6  | 0 | 5.878936  | 0.631182  | -0.774892 |
| 141 | 6 | 0 | 3.537941  | 1.662890  | -2.979453 | 65  | 1  | 0 | 6.137785  | 0.622353  | 1.350712  |
| 142 | 1 | 0 | 2.809722  | 0.895398  | -2.703674 | 66  | 1  | 0 | 5.331239  | 0.422252  | -2.838106 |
| 143 | 1 | 0 | 3.261549  | 2.057821  | -3.962804 | 67  | 7  | 0 | 0.565876  | 0.759397  | 0.733037  |
| 144 | 1 | 0 | 4.514937  | 1.174862  | -3.070833 | 68  | 1  | 0 | 1.060426  | 1.632547  | 0.367191  |
| 145 | 6 | 0 | 4.529252  | 3.902065  | 3.760664  | 69  | 16 | 0 | -0.107828 | 0.995347  | 2.216868  |
| 146 | 1 | 0 | 5.552524  | 3.525485  | -2.478971 | 70  | 8  | 0 | 0.675348  | 2.036285  | 2.854592  |
| 147 | 1 | 0 | 4.226092  | 4.308213  | -3.346387 | 71  | 8  | 0 | -1.554099 | 1.054410  | 2.200661  |
| 148 | 1 | 0 | 4.551268  | 4.723375  | -1.652253 | 72  | 6  | 0 | 0.300791  | -0.610359 | 3.098200  |
| 149 | 6 | 0 | -5.173048 | 3.682698  | 2.668829  | 73  | 9  | 0 | -0.808033 | -1.301213 | 3.293665  |
| 150 | 1 | 0 | -6.187056 | 3.305995  | 2.772139  | 74  | 9  | 0 | 1.155382  | -1.343786 | 2.398229  |
| 151 | 6 | 0 | -2.546296 | 4.603738  | 2.404064  | 75  | 9  | 0 | 0.840367  | -0.302745 | 4.266991  |
| 152 | 1 | 0 | -1.524241 | 4.957037  | 2.326198  | 76  | 6  | 0 | -2.746908 | 4.367865  | 0.712599  |
| 153 | 6 | 0 | -4.769861 | 4.805063  | 3.342214  | 77  | 6  | 0 | -3.356202 | 2.998564  | 0.403698  |
| 154 | 1 | 0 | -5.464224 | 5.338755  | 3.983204  | 78  | 1  | 0 | -4.009546 | 2.679130  | 1.221388  |
| 155 | 6 | 0 | -3.435746 | 5.258623  | 3.217327  | 79  | 1  | 0 | -3.960630 | 3.034277  | -0.508684 |
| 156 | 1 | 0 | -3.110813 | 6.130778  | 3.775702  | 80  | 1  | 0 | -2.587830 | 2.229962  | 0.283095  |
| 157 | 6 | 0 | -1.705723 | 5.388770  | -0.465548 | 81  | 6  | 0 | -3.749988 | 5.498529  | 0.478380  |
| 158 | 1 | 0 | -2.699374 | 4.958904  | -0.410258 | 82  | 1  | 0 | -4.204629 | 5.434202  | -0.514195 |
| 159 | 6 | 0 | 0.847276  | 6.509457  | -0.682371 | 83  | 1  | 0 | -4.553783 | 5.434419  | 1.218714  |
| 160 | 1 | 0 | 1.847499  | 6.924451  | -0.774007 | 84  | 1  | 0 | -3.278001 | 6.482605  | 0.584174  |
| 161 | 6 | 0 | -0.253529 | 7.243560  | -1.034294 | 85  | 6  | 0 | -2.269259 | 4.421672  | 2.186270  |
| 162 | 1 | 0 | -0.142206 | 8.258379  | -1.402423 | 86  | 1  | 0 | -1.570901 | 3.610156  | 2.402079  |
| 163 | 6 | 0 | -1.541820 | 6.665807  | -0.938261 | 87  | 1  | 0 | -1.782271 | 5.376907  | 2.414639  |
| 164 | 1 | 0 | -2.410488 | 7.237632  | -1.248894 | 88  | 1  | 0 | -3.139513 | 4.316212  | 2.841533  |
| 164 | 1 | 0 |           |           |           | 89  | 6  | 0 | 2.894526  | -5.711903 | 1.623071  |
|     |   |   |           |           |           | 90  | 1  | 0 | 3.955598  | -5.778967 | 1.848191  |
|     |   |   |           |           |           | 91  | 6  | 0 | 0.165937  | -5.489114 | 1.048022  |
|     |   |   |           |           |           | 92  | 1  | 0 | -0.896787 | -5.403285 | 0.849589  |
|     |   |   |           |           |           | 93  | 6  | 0 | -0.555639 | -5.351440 | -2.000166 |
|     |   |   |           |           |           | 94  | 1  | 0 | 0.504117  | -5.386094 | -1.773444 |
|     |   |   |           |           |           | 95  | 6  | 0 | -3.276584 | -5.256542 | -2.645644 |
|     |   |   |           |           |           | 96  | 1  | 0 | -4.332437 | -5.201148 | -2.896710 |
|     |   |   |           |           |           | 97  | 6  | 0 | 2.028296  | -6.694406 | 2.022397  |
|     |   |   |           |           |           | 98  | 1  | 0 | 2.393344  | -7.560174 | 2.565575  |
|     |   |   |           |           |           | 99  | 6  | 0 | 0.646778  | -6.570740 | 1.740782  |
|     |   |   |           |           |           | 100 | 1  | 0 | -0.040854 | -7.337959 | 2.082349  |
|     |   |   |           |           |           | 101 | 6  | 0 | -1.116758 | -6.314171 | -2.799498 |
|     |   |   |           |           |           | 102 | 1  | 0 | -0.495765 | -7.110459 | -3.197496 |
|     |   |   |           |           |           | 103 | 6  | 0 | -2.495193 | -6.276922 | -3.118199 |
|     |   |   |           |           |           | 104 | 1  | 0 | -2.924685 | -7.050165 | -3.747111 |
|     |   |   |           |           |           | 105 | 6  | 0 | 3.405826  | -1.392177 | -2.836900 |
|     |   |   |           |           |           | 106 | 1  | 0 | 2.651589  | -2.114025 | -2.515565 |
|     |   |   |           |           |           | 107 | 6  | 0 | 4.314262  | -1.086081 | 2.244749  |
|     |   |   |           |           |           | 108 | 1  | 0 | 3.507540  | -1.818647 | 2.289864  |
|     |   |   |           |           |           | 109 | 6  | 0 | 6.991997  | 1.646551  | -0.977906 |
|     |   |   |           |           |           | 110 | 1  | 0 | 6.785598  | 2.482998  | -0.293519 |
|     |   |   |           |           |           | 111 | 6  | 0 | -3.810111 | -1.771713 | 2.167687  |
|     |   |   |           |           |           | 112 | 1  | 0 | -2.763693 | -1.991719 | 1.934028  |
|     |   |   |           |           |           | 113 | 6  | 0 | -7.208096 | 1.647485  | 0.650653  |
|     |   |   |           |           |           | 114 | 1  | 0 | -7.382378 | 1.596337  | 1.733185  |
|     |   |   |           |           |           | 115 | 6  | 0 | -3.877047 | -0.139791 | -2.686779 |
|     |   |   |           |           |           | 116 | 1  | 0 | -2.982629 | -0.769096 | -2.717994 |
|     |   |   |           |           |           | 117 | 6  | 0 | -3.825161 | -1.115909 | 3.550399  |
|     |   |   |           |           |           | 118 | 1  | 0 | -3.283653 | -1.747025 | 4.262020  |
|     |   |   |           |           |           | 119 | 1  | 0 | -3.345456 | -0.133863 | 3.524483  |
|     |   |   |           |           |           | 120 | 1  | 0 | -4.845708 | -1.002067 | 3.931743  |
|     |   |   |           |           |           | 121 | 6  | 0 | -4.583572 | -3.097862 | 2.198236  |
|     |   |   |           |           |           | 122 | 1  | 0 | -4.530466 | -3.616896 | 1.236269  |
|     |   |   |           |           |           | 123 | 1  | 0 | -4.180026 | -3.761638 | 2.970422  |
|     |   |   |           |           |           | 124 | 1  | 0 | -5.639417 | -2.911918 | 2.425463  |
|     |   |   |           |           |           | 125 | 6  | 0 | -8.452589 | 1.092641  | -0.054102 |
|     |   |   |           |           |           | 126 | 1  | 0 | -8.329231 | 1.135871  | -1.142018 |
|     |   |   |           |           |           | 127 | 1  | 0 | -8.628136 | 0.048912  | 0.222075  |
|     |   |   |           |           |           | 128 | 1  | 0 | -9.341047 | 1.676364  | 0.208660  |
|     |   |   |           |           |           | 129 | 6  | 0 | -6.992230 | 3.118008  | 0.278491  |
|     |   |   |           |           |           | 130 | 1  | 0 | -7.866538 | 3.706183  | 0.510179  |
|     |   |   |           |           |           | 131 | 1  | 0 | -6.147600 | 3.547014  | 0.824318  |
|     |   |   |           |           |           | 132 | 1  | 0 | -6.789908 | 3.228430  | -0.793044 |
|     |   |   |           |           |           | 133 | 6  | 0 | -3.433523 | 1.272776  | -3.083432 |
|     |   |   |           |           |           | 134 | 1  | 0 | -2.964706 | 1.260741  | -4.073051 |
|     |   |   |           |           |           | 135 | 1  | 0 | -4.282216 | 1.966685  | -3.123156 |
|     |   |   |           |           |           | 136 | 1  | 0 | -2.698263 | 1.643631  | -2.365502 |
|     |   |   |           |           |           | 137 | 6  | 0 | -4.895911 | -0.693671 | -3.689102 |
|     |   |   |           |           |           | 138 | 1  | 0 | -5.173779 | -1.725795 | -3.453060 |
|     |   |   |           |           |           | 139 | 1  | 0 | -5.812163 | -0.092304 | -3.686103 |
|     |   |   |           |           |           | 140 | 1  | 0 | -4.484324 | -0.674830 | -4.703496 |
|     |   |   |           |           |           | 141 | 6  | 0 | 2.688526  | -0.283454 | -3.616405 |
|     |   |   |           |           |           | 142 | 1  | 0 | 1.987157  | 0.262008  | -2.978863 |
|     |   |   |           |           |           | 143 | 1  | 0 | 3.406794  | 0.434536  | -4.028788 |
|     |   |   |           |           |           | 144 | 1  | 0 | 2.128410  | -0.711368 | -4.454087 |

TS Si E (M06-2X)

M06-2X/6-31g(d); E(RM062X) = -4246.635557 hartree  
 Sum of electronic and thermal Free Energies = -4245.352082 hartree  
 Thermal correction to Gibbs Free Energy = 1.283476 hartree  
 smd(toluen)/MN15/6-31g(d); E(RMN15) = -4243.884321 hartree

| Center Number | Atomic Number | Atomic Type | Coordinates (Angstroms) |           |           |
|---------------|---------------|-------------|-------------------------|-----------|-----------|
|               |               |             | X                       | Y         | Z         |
| 1             | 5             | 0           | 0.631441                | 3.869879  | -0.977511 |
| 2             | 6             | 0           | 0.034282                | 3.668790  | -2.527691 |
| 3             | 6             | 0           | -0.894621               | 4.778504  | -2.666675 |
| 4             | 6             | 0           | -2.193701               | 4.743076  | -2.265191 |
| 5             | 1             | 0           | 0.903430                | 3.748717  | -3.185966 |
| 6             | 1             | 0           | -0.426531               | 2.681120  | -2.599317 |
| 7             | 1             | 0           | -0.462784               | 5.749616  | -2.910522 |
| 8             | 1             | 0           | -2.812097               | 5.634121  | -2.316458 |
| 9             | 1             | 0           | -2.702768               | 3.793680  | -2.126401 |
| 10            | 8             | 0           | 1.186930                | 5.175331  | -0.782255 |
| 11            | 6             | 0           | 2.251811                | 5.048888  | 0.159775  |
| 12            | 8             | 0           | 1.609694                | 2.902115  | -0.509608 |
| 13            | 6             | 0           | 2.804945                | 3.626587  | -0.159651 |
| 14            | 6             | 0           | 1.679200                | 5.145078  | 1.577266  |
| 15            | 1             | 0           | 1.018918                | 4.301872  | 1.803744  |
| 16            | 1             | 0           | 1.103706                | 6.073719  | 1.655186  |
| 17            | 1             | 0           | 2.471557                | 5.168398  | 2.332323  |
| 18            | 6             | 0           | 3.249368                | 6.174111  | -0.076829 |
| 19            | 1             | 0           | 2.790953                | 7.131563  | 0.188179  |
| 20            | 1             | 0           | 3.548096                | 6.218811  | -1.126155 |
| 21            | 1             | 0           | 4.143055                | 6.039796  | 0.542625  |
| 22            | 6             | 0           | 3.471296                | -2.920428 | 1.006110  |
| 23            | 1             | 0           | 2.801793                | 2.846764  | 1.867080  |
| 24            | 1             | 0           | 3.751232                | 1.909939  | 0.695360  |
| 25            | 1             | 0           | 4.384207                | 3.446593  | 1.311052  |
| 26            | 6             | 0           | 3.715877                | 3.613103  | -1.385976 |
| 27            | 1             | 0           | 3.257171                | 4.160199  | -2.215741 |
| 28            | 1             | 0           | 3.867276                | 2.573011  | -1.691701 |
| 29            | 1             | 0           | 4.691740                | 4.060594  | -1.166452 |
| 30            |               |             |                         |           |           |



|     |   |   |          |           |           |    |    |   |           |           |           |
|-----|---|---|----------|-----------|-----------|----|----|---|-----------|-----------|-----------|
| 145 | 6 | 0 | 4.391133 | -2.148463 | -3.738145 | 5  | 1  | 0 | -4.515876 | 1.662497  | 1.604666  |
| 146 | 1 | 0 | 5.164829 | -1.479615 | -4.130131 | 6  | 6  | 0 | 3.245732  | 2.497887  | -0.764520 |
| 147 | 1 | 0 | 4.888921 | -2.953491 | -3.188619 | 7  | 6  | 0 | 0.634313  | 1.966787  | 0.166101  |
| 148 | 1 | 0 | 3.864464 | -2.587259 | -4.591892 | 8  | 6  | 0 | 1.573192  | 0.968630  | -0.023284 |
| 149 | 6 | 0 | 7.070000 | 2.208483  | -2.396417 | 9  | 6  | 0 | 2.908824  | 1.194360  | -0.460185 |
| 150 | 1 | 0 | 7.347368 | 1.426143  | -3.112091 | 10 | 1  | 0 | 4.262138  | 2.715768  | -1.080563 |
| 151 | 1 | 0 | 6.118874 | 2.643707  | -2.717641 | 11 | 8  | 0 | -1.118869 | -0.144634 | -0.771179 |
| 152 | 1 | 0 | 7.835767 | 2.988206  | -2.447873 | 12 | 15 | 0 | 0.172112  | -1.114840 | -0.684129 |
| 153 | 6 | 0 | 8.345628 | 1.038275  | -0.582869 | 13 | 8  | 0 | 1.205752  | -0.351130 | 0.295600  |
| 154 | 1 | 0 | 9.144645 | 1.781416  | -0.672450 | 14 | 6  | 0 | -5.896631 | -1.240088 | -2.097996 |
| 155 | 1 | 0 | 8.337907 | 0.666112  | 0.445510  | 15 | 6  | 0 | -5.043617 | -0.257893 | -2.603354 |
| 156 | 1 | 0 | 8.584582 | 0.196675  | -1.242142 | 16 | 6  | 0 | -4.088115 | 0.390958  | -1.813260 |
| 157 | 6 | 0 | 5.548467 | -1.715108 | 2.902225  | 17 | 6  | 0 | -3.957737 | 0.021098  | -0.449231 |
| 158 | 1 | 0 | 6.386754 | -1.010537 | 2.928067  | 18 | 6  | 0 | -4.820618 | -0.967556 | 0.090882  |
| 159 | 1 | 0 | 5.324544 | -2.004936 | 3.933998  | 19 | 6  | 0 | -5.765134 | -1.572541 | -0.748239 |
| 160 | 1 | 0 | 5.882679 | -2.605744 | 2.359964  | 20 | 1  | 0 | -5.147696 | 0.033607  | -3.646336 |
| 161 | 6 | 0 | 3.844245 | 0.138520  | 3.037822  | 21 | 1  | 0 | -6.430741 | -2.318356 | -0.322648 |
| 162 | 1 | 0 | 3.608058 | -0.143883 | 4.069057  | 22 | 6  | 0 | 6.128875  | -1.675363 | -0.795053 |
| 163 | 1 | 0 | 4.613874 | 0.918414  | 3.068148  | 23 | 6  | 0 | 5.432106  | -1.239773 | -1.923853 |
| 164 | 1 | 0 | 2.948423 | 0.579017  | 2.590683  | 24 | 6  | 0 | 4.349636  | -0.356006 | -1.841814 |

**pivalaldehyde (1a) (B3LYP)**

B3LYP/6-31g(d); E(RB3LYP) = -271.773728 hartree

Sum of electronic and thermal Free Energies = -271.663424 hartree

Thermal correction to Gibbs Free Energy = 0.110304 hartree

| Center Number | Atomic Number | Atomic Type | Coordinates (Angstroms) |           |           |
|---------------|---------------|-------------|-------------------------|-----------|-----------|
|               |               |             | X                       | Y         | Z         |
| 1             | 8             | 0           | 2.088464                | -0.096837 | 0.000082  |
| 2             | 6             | 0           | 1.023341                | -0.659984 | 0.000282  |
| 3             | 1             | 0           | 0.971922                | -1.773522 | 0.000587  |
| 4             | 6             | 0           | -0.329782               | 0.027053  | -0.000027 |
| 5             | 6             | 0           | -0.148292               | 1.541018  | -0.000218 |
| 6             | 1             | 0           | -1.123169               | 2.039193  | -0.000498 |
| 7             | 1             | 0           | 0.410382                | 1.865218  | 0.882134  |
| 8             | 1             | 0           | 0.410724                | 1.864978  | -0.882445 |
| 9             | 6             | 0           | -1.081423               | -0.443270 | -1.254129 |
| 10            | 1             | 0           | -1.170081               | -1.535279 | -1.279834 |
| 11            | 1             | 0           | -2.092897               | -0.023998 | -1.259822 |
| 12            | 1             | 0           | -0.571226               | -0.117992 | -2.166374 |
| 13            | 6             | 0           | -1.081809               | -0.442852 | 1.254070  |
| 14            | 1             | 0           | -1.170621               | -1.534844 | 1.279967  |
| 15            | 1             | 0           | -0.571750               | -0.117430 | 2.166339  |
| 16            | 1             | 0           | -2.093206               | -0.023414 | 1.259430  |

**2-allyl-4,4,5,5-tetramethyl-1,3,2-dioxaborolane (2) (B3LYP)**

B3LYP/6-31g(d); E(RB3LYP) = -528.590975 hartree

Sum of electronic and thermal Free Energies = -528.377916 hartree

Thermal correction to Gibbs Free Energy = 0.213059 hartree

| Center Number | Atomic Number | Atomic Type | Coordinates (Angstroms) |           |           |
|---------------|---------------|-------------|-------------------------|-----------|-----------|
|               |               |             | X                       | Y         | Z         |
| 1             | 6             | 0           | 2.306528                | -0.197871 | -0.995888 |
| 2             | 6             | 0           | 3.214638                | 0.432913  | 0.023595  |
| 3             | 6             | 0           | 4.186739                | -0.201022 | 0.673112  |
| 4             | 8             | 0           | -0.105237               | -1.141560 | -0.684763 |
| 5             | 5             | 0           | 0.801418                | -0.123327 | -0.540198 |
| 6             | 8             | 0           | 0.257966                | 0.992150  | 0.048215  |
| 7             | 6             | 0           | -1.169785               | 0.790312  | 0.103500  |
| 8             | 6             | 0           | -1.285302               | -0.767769 | 0.058950  |
| 9             | 6             | 0           | -1.157941               | -1.410108 | 1.439164  |
| 10            | 6             | 0           | -2.514050               | -1.298518 | -0.661766 |
| 11            | 6             | 0           | -1.713040               | 1.436221  | 1.367930  |
| 12            | 6             | 0           | -1.760956               | 1.463534  | -1.134018 |
| 13            | 1             | 0           | 2.393744                | 0.346017  | -1.948255 |
| 14            | 1             | 0           | 2.599232                | -1.234397 | -1.190334 |
| 15            | 1             | 0           | 3.018398                | 1.480934  | 0.247816  |
| 16            | 1             | 0           | 4.406407                | -1.248816 | 0.482373  |
| 17            | 1             | 0           | 4.797783                | 0.301806  | 1.415904  |
| 18            | 1             | 0           | -0.280809               | -1.025292 | 1.968805  |
| 19            | 1             | 0           | -1.035946               | -2.489259 | 1.314695  |
| 20            | 1             | 0           | -2.046282               | -1.226254 | 2.050837  |
| 21            | 1             | 0           | -2.503752               | -2.391778 | -0.644744 |
| 22            | 1             | 0           | -2.536070               | -0.973921 | -1.703780 |
| 23            | 1             | 0           | -3.428314               | -0.956212 | -0.164970 |
| 24            | 1             | 0           | -1.586698               | 2.520705  | 1.307730  |
| 25            | 1             | 0           | -1.185106               | 1.080055  | 2.254425  |
| 26            | 1             | 0           | -2.781076               | 1.220855  | 1.480931  |
| 27            | 1             | 0           | -1.386311               | 0.995453  | -2.049774 |
| 28            | 1             | 0           | -1.461332               | 2.514805  | -1.139515 |
| 29            | 1             | 0           | -2.853787               | 1.411058  | -1.136249 |

**(R)-3d (B3LYP)**

B3LYP/6-31g(d); E(RB3LYP) = -3447.760690 hartree

Sum of electronic and thermal Free Energies = -3446.877656 hartree

Thermal correction to Gibbs Free Energy = 0.883033 hartree

| Center Number | Atomic Number | Atomic Type | Coordinates (Angstroms) |          |          |
|---------------|---------------|-------------|-------------------------|----------|----------|
|               |               |             | X                       | Y        | Z        |
| 1             | 6             | 0           | -0.711888               | 1.688483 | 0.749783 |
| 2             | 6             | 0           | -1.579116               | 0.765211 | 0.185923 |
| 3             | 6             | 0           | -2.988491               | 0.770663 | 0.420366 |
| 4             | 6             | 0           | -3.447937               | 1.606159 | 1.416384 |

|     |   |   |           |          |           |    |   |   |           |           |           |
|-----|---|---|-----------|----------|-----------|----|---|---|-----------|-----------|-----------|
| 104 | 6 | 0 | 2.669689  | 4.870806 | -1.126756 | 74 | 1 | 0 | -1.985435 | -3.031884 | -3.304870 |
| 105 | 1 | 0 | 3.691112  | 5.047638 | -1.454643 | 75 | 1 | 0 | -3.447424 | -4.025165 | -3.203802 |
| 106 | 6 | 0 | 0.041061  | 4.373898 | -0.300786 | 76 | 6 | 0 | 1.366244  | -3.982511 | 3.067288  |
| 107 | 1 | 0 | -0.984888 | 4.197002 | -0.002949 | 77 | 6 | 0 | 1.651429  | -5.432423 | 3.478364  |
| 108 | 6 | 0 | 0.416194  | 5.629523 | -0.725461 | 78 | 1 | 0 | 2.337090  | -5.912310 | 2.774105  |
| 109 | 1 | 0 | -0.320428 | 6.427727 | -0.753794 | 79 | 1 | 0 | 2.107885  | -5.459796 | 4.473688  |
| 110 | 6 | 0 | 1.746197  | 5.889356 | -1.129885 | 80 | 1 | 0 | 0.733364  | -6.025760 | 3.504390  |
| 111 | 1 | 0 | 2.029796  | 6.886812 | -1.453818 | 81 | 6 | 0 | 0.348409  | -3.318215 | 4.030742  |
| 112 | 6 | 0 | -0.333865 | 3.243240 | 2.687414  | 82 | 1 | 0 | 0.785279  | -3.247975 | 5.033981  |
| 113 | 1 | 0 | 0.726951  | 3.275825 | 2.465576  | 83 | 1 | 0 | 0.085981  | -2.307179 | 3.700300  |
| 114 | 6 | 0 | -3.061375 | 3.146739 | 3.314626  | 84 | 1 | 0 | -0.572076 | -3.907624 | 4.100412  |
| 115 | 1 | 0 | -4.121343 | 3.097396 | 3.551684  | 85 | 6 | 0 | 2.660432  | -3.145241 | 3.024719  |
| 116 | 6 | 0 | -2.207054 | 3.907540 | 4.079231  | 86 | 1 | 0 | 2.472885  | -2.126476 | 2.671507  |
| 117 | 1 | 0 | -2.585076 | 4.470968 | 4.927730  | 87 | 1 | 0 | 3.094181  | -3.077857 | 4.029647  |
| 118 | 6 | 0 | -0.828722 | 3.944789 | 3.765346  | 88 | 1 | 0 | 3.401770  | -3.599023 | 2.359228  |
| 119 | 1 | 0 | -0.151713 | 4.528855 | 4.382730  | 89 | 6 | 0 | -4.194431 | 2.548284  | -1.615108 |

**Int-1 (B3LYP)**

B3LYP/6-31g(d); E(RB3LYP) = -4248.145003 hartree  
 Sum of electronic and thermal Free Energies= -4246.897101 hartree  
 Thermal correction to Gibbs Free Energy= 1.247901 hartree

| Center Number | Atomic Number | Atomic Type | Coordinates (Angstroms) |           |           | Center | Atomic | Atomic | Coordinates (Angstroms) |           |           |
|---------------|---------------|-------------|-------------------------|-----------|-----------|--------|--------|--------|-------------------------|-----------|-----------|
|               |               |             | X                       | Y         | Z         |        |        |        | X                       | Y         | Z         |
| 1             | 6             | 0           | 0.947785                | 3.104920  | -0.229126 | 100    | 1      | 0      | 6.875305                | -1.980964 | 2.737100  |
| 2             | 6             | 0           | 1.743784                | 1.979969  | -0.077664 | 101    | 6      | 0      | 6.850028                | -3.386769 | 1.122107  |
| 3             | 6             | 0           | 3.139611                | 1.961513  | -0.379510 | 102    | 1      | 0      | 7.600745                | -4.043184 | 1.578170  |
| 4             | 6             | 0           | 3.642382                | 3.058752  | -1.046939 | 103    | 1      | 0      | 5.859104                | -3.790823 | 1.354969  |
| 5             | 1             | 0           | 4.704614                | 3.096932  | -1.268857 | 104    | 1      | 0      | 6.984663                | -3.437639 | 0.035357  |
| 6             | 6             | 0           | -2.878588               | 3.612803  | 1.693750  | 105    | 6      | 0      | 8.425760                | -1.415934 | 1.370005  |
| 7             | 6             | 0           | -0.350968               | 3.254637  | 0.491666  | 106    | 1      | 0      | 8.624780                | -1.366281 | 0.292808  |
| 8             | 6             | 0           | -1.370276               | 2.327718  | 0.366557  | 107    | 1      | 0      | 8.558603                | -0.408955 | 1.780065  |
| 9             | 6             | 0           | -2.668342               | 2.482231  | 0.929818  | 108    | 1      | 0      | 9.180974                | -2.071443 | 1.820321  |
| 10            | 1             | 0           | -3.862912               | 3.779187  | 2.122568  | 109    | 6      | 0      | 4.651310                | 2.530069  | 3.254864  |
| 11            | 8             | 0           | 1.226901                | 0.826796  | 0.525319  | 110    | 1      | 0      | 5.370729                | 1.930775  | 3.824613  |
| 12            | 15            | 0           | -0.140430               | 0.048862  | 0.157649  | 111    | 1      | 0      | 5.215556                | 3.124725  | 2.527764  |
| 13            | 8             | 0           | -1.130256               | 1.187334  | -0.422209 | 112    | 1      | 0      | 4.162860                | 3.219526  | 3.954205  |
| 14            | 6             | 0           | 5.949629                | -0.994683 | 1.100927  | 113    | 6      | 0      | 2.768542                | 0.857448  | 3.584382  |
| 15            | 6             | 0           | 5.190858                | -0.206948 | 1.966974  | 114    | 1      | 0      | 1.974264                | 0.286099  | 3.094820  |
| 16            | 6             | 0           | 4.266206                | 0.739263  | 1.511335  | 115    | 1      | 0      | 3.387447                | 0.160222  | 4.161026  |
| 17            | 6             | 0           | 4.064688                | 0.885747  | 0.114389  | 116    | 1      | 0      | 2.300171                | 1.548105  | 4.296136  |
| 18            | 6             | 0           | 4.828289                | 0.099983  | -0.787555 | 117    | 6      | 0      | 6.006727                | 0.886555  | -2.888451 |
| 19            | 6             | 0           | 5.750777                | -0.818119 | -0.270043 | 118    | 1      | 0      | 6.888350                | 0.257922  | -2.714322 |
| 20            | 1             | 0           | 5.351365                | -0.310884 | 3.037947  | 119    | 1      | 0      | 5.905219                | 1.026579  | -3.971421 |
| 21            | 1             | 0           | 6.344522                | -1.402735 | -0.967678 | 120    | 1      | 0      | 6.209749                | 1.865074  | -2.438818 |
| 22            | 6             | 0           | -6.128335               | -0.064632 | 0.419880  | 121    | 6      | 0      | 4.467580                | -1.109711 | -3.009827 |
| 23            | 6             | 0           | -5.362213               | -0.115452 | 1.585986  | 122    | 1      | 0      | 3.571991                | -1.599262 | -2.618536 |
| 24            | 6             | 0           | -4.206598               | 0.655983  | 1.757513  | 123    | 1      | 0      | 4.316107                | -0.949463 | -4.083435 |
| 25            | 6             | 0           | -3.805048               | 1.522308  | 0.712612  | 124    | 1      | 0      | 5.306787                | -1.805827 | -2.896284 |
| 26            | 6             | 0           | -4.553762               | 1.578906  | -0.487801 | 125    | 6      | 0      | -4.226889               | 1.264190  | 4.216953  |
| 27            | 6             | 0           | -5.696160               | 0.779753  | -0.605306 | 126    | 1      | 0      | -3.660496               | 1.220741  | 5.155043  |
| 28            | 1             | 0           | -5.677058               | -0.766607 | 2.396996  | 127    | 1      | 0      | -4.416344               | 2.318014  | 3.985410  |
| 29            | 1             | 0           | -6.283482               | 0.826844  | -1.518298 | 128    | 1      | 0      | -5.197589               | 0.783443  | 4.389037  |
| 30            | 8             | 0           | -0.573444               | -0.785989 | 1.295328  | 129    | 6      | 0      | -3.124043               | -0.891994 | 3.478893  |
| 31            | 1             | 0           | -0.267274               | -1.919989 | -1.126659 | 130    | 1      | 0      | -2.532335               | -0.900972 | 4.402276  |
| 32            | 7             | 0           | 0.028746                | -0.922577 | -1.227397 | 131    | 1      | 0      | -4.028888               | -1.481782 | 3.666886  |
| 33            | 16            | 0           | 0.516584                | -0.519439 | -2.768151 | 132    | 1      | 0      | -2.538412               | -1.383142 | 2.698099  |
| 34            | 8             | 0           | 0.824878                | -1.766350 | -3.455523 | 133    | 6      | 0      | -8.515434               | -0.317390 | 1.214867  |
| 35            | 8             | 0           | 1.432962                | 0.611054  | -2.704492 | 134    | 1      | 0      | -8.230858               | -0.443154 | 2.266372  |
| 36            | 6             | 0           | -1.006326               | 0.155192  | -3.645909 | 135    | 1      | 0      | -8.691853               | 0.749987  | 1.042787  |
| 37            | 9             | 0           | -2.072816               | -0.615832 | -3.396273 | 136    | 1      | 0      | -9.460937               | -0.850369 | 1.057613  |
| 38            | 9             | 0           | -1.259960               | 1.400872  | -3.258316 | 137    | 6      | 0      | -7.219710               | -2.371160 | 0.485120  |
| 39            | 9             | 0           | -0.749824               | 0.137731  | -4.952522 | 138    | 1      | 0      | -6.483463               | -2.775618 | -0.217796 |
| 40            | 6             | 0           | -1.852335               | 4.549631  | 1.969370  | 139    | 1      | 0      | -6.870542               | -2.593575 | 1.500223  |
| 41            | 6             | 0           | -0.559477               | 4.370283  | 1.382064  | 140    | 1      | 0      | -8.163574               | -2.908671 | 0.335029  |
| 42            | 6             | 0           | 1.459535                | 4.180789  | -1.038484 | 141    | 6      | 0      | -4.922685               | 3.895955  | -1.428312 |
| 43            | 6             | 0           | 2.825232                | 4.141013  | -1.459924 | 142    | 1      | 0      | -6.009731               | 3.756867  | -1.469567 |
| 44            | 6             | 0           | 1.147970                | -5.295429 | -1.368969 | 143    | 1      | 0      | -4.678514               | 4.354363  | -0.464720 |
| 45            | 6             | 0           | 2.187998                | -4.225149 | -1.231020 | 144    | 1      | 0      | -4.641417               | 4.600488  | -2.220651 |
| 46            | 6             | 0           | 3.312945                | -4.315801 | -0.513646 | 145    | 6      | 0      | -4.469712               | 1.990248  | -3.022620 |
| 47            | 8             | 0           | -1.291723               | -5.911620 | -0.796036 | 146    | 1      | 0      | -4.031244               | 0.997740  | -3.156479 |
| 48            | 5             | 0           | -0.316221               | -4.933090 | -0.852981 | 147    | 1      | 0      | -5.542821               | 1.918222  | -3.233436 |
| 49            | 8             | 0           | 0.247983                | -4.913430 | 1.150185  | 148    | 1      | 0      | -4.038177               | 2.657679  | -3.777311 |
| 50            | 8             | 0           | -0.899384               | -3.650683 | -1.015262 | 149    | 6      | 0      | -2.084084               | 5.652733  | 2.835128  |
| 51            | 6             | 0           | 0.713294                | -3.931184 | 1.705097  | 150    | 1      | 0      | -3.076874               | 5.777611  | 3.260423  |
| 52            | 6             | 0           | -2.313420               | -3.876539 | -1.340398 | 151    | 6      | 0      | 0.467654                | 5.286383  | 1.742552  |
| 53            | 6             | 0           | -2.580662               | -5.271523 | -0.669462 | 152    | 1      | 0      | 1.465615                | 5.150688  | 1.344781  |
| 54            | 6             | 0           | -2.946008               | -5.173521 | 0.820178  | 153    | 6      | 0      | 0.217145                | 6.334453  | 2.600657  |
| 55            | 6             | 0           | -3.611220               | -6.145688 | -1.386151 | 154    | 1      | 0      | 1.022550                | 7.013700  | 2.866047  |
| 56            | 6             | 0           | -3.151159               | -2.724881 | -0.794251 | 155    | 6      | 0      | -1.073639               | 6.532450  | 3.143752  |
| 57            | 6             | 0           | -2.406742               | -3.940830 | -2.871735 | 156    | 1      | 0      | -1.258735               | 7.368744  | 3.812040  |
| 58            | 1             | 0           | 1.024400                | -5.531671 | -2.443033 | 157    | 6      | 0      | 0.656957                | 5.273525  | -1.464937 |
| 59            | 1             | 0           | 1.480410                | -6.224433 | -0.888551 | 158    | 1      | 0      | -0.388794               | 5.305559  | -1.180570 |
| 60            | 1             | 0           | 1.989765                | -3.302953 | -1.777755 | 159    | 6      | 0      | 3.343009                | 5.199727  | -2.252680 |
| 61            | 1             | 0           | 3.573303                | -5.225651 | 0.025976  | 160    | 1      | 0      | 4.386065                | 5.157834  | -2.556693 |
| 62            | 1             | 0           | 4.023156                | -3.495517 | -0.460556 | 161    | 6      | 0      | 2.540989                | 6.247201  | -2.643388 |
| 63            | 1             | 0           | 0.610688                | -2.933073 | 1.249416  | 162    | 1      | 0      | 2.944306                | 7.046551  | -3.258751 |
| 64            | 1             | 0           | -2.257856               | -4.525091 | 1.364574  | 163    | 6      | 0      | 1.182334                | 6.275064  | -2.252112 |
| 65            | 1             | 0           | -2.887451               | -6.173313 | 1.261858  | 164    | 1      | 0      | 0.544553                | 7.091755  | -2.579021 |
| 66            | 1             | 0           | -3.965019               | -4.795820 | 0.956426  |        |        |        |                         |           |           |
| 67            | 1             | 0           | -3.697637               | -7.103489 | -0.864477 |        |        |        |                         |           |           |
| 68            | 1             | 0           | -3.320108               | -6.353103 | -2.416851 |        |        |        |                         |           |           |
| 69            | 1             | 0           | -4.599385               | -5.672885 | -1.387640 |        |        |        |                         |           |           |
| 70            | 1             | 0           | -2.944849               | -1.799709 | -1.338697 |        |        |        |                         |           |           |
| 71            | 1             | 0           | -2.950537               | -2.544396 | 0.262960  |        |        |        |                         |           |           |
| 72            | 1             | 0           | -4.217371               | -2.940641 | -0.912942 |        |        |        |                         |           |           |
| 73            | 1             | 0           | -1.847287               | -4.793674 | -3.266289 |        |        |        |                         |           |           |

**Int-2 (B3LYP)**

B3LYP/6-31g(d); E(RB3LYP) = -4248.190779 hartree  
 Sum of electronic and thermal Free Energies= -4246.932756 hartree  
 Thermal correction to Gibbs Free Energy= 1.258023 hartree

Center Atomic Atomic Coordinates (Angstroms)

| Number | Number | Type | X         | Y         | Z         | 98  | 1 | 0 | -3.870260 | 0.921258  | 2.555061  |
|--------|--------|------|-----------|-----------|-----------|-----|---|---|-----------|-----------|-----------|
| 1      | 6      | 0    | -0.915656 | 3.126300  | 0.238636  | 100 | 1 | 0 | -6.983566 | -1.913139 | -1.635753 |
| 2      | 6      | 0    | -1.721195 | 2.008907  | 0.081819  | 101 | 6 | 0 | -6.821278 | -1.986357 | -2.719970 |
| 3      | 6      | 0    | -3.116594 | 1.998568  | 0.387584  | 102 | 1 | 0 | -6.864776 | -3.333257 | -1.055374 |
| 4      | 6      | 0    | -3.609830 | 3.096660  | 1.060601  | 103 | 1 | 0 | -7.599761 | -3.999875 | -1.521745 |
| 5      | 1      | 0    | -4.671186 | 3.141760  | 1.285397  | 104 | 1 | 0 | -5.867916 | -3.753428 | -1.227652 |
| 6      | 6      | 0    | 2.910951  | 3.602923  | -1.694253 | 105 | 6 | 0 | -7.049396 | -3.345255 | 0.025101  |
| 7      | 6      | 0    | 0.383858  | 3.269656  | -0.482994 | 106 | 1 | 0 | -8.403677 | -1.351943 | -1.419875 |
| 8      | 6      | 0    | 1.396096  | 2.335205  | -0.360481 | 107 | 1 | 0 | -8.629068 | -1.256799 | -0.350801 |
| 9      | 6      | 0    | 2.692972  | 2.473939  | -0.930197 | 108 | 1 | 0 | -8.511621 | -0.360532 | -1.873103 |
| 10     | 1      | 0    | 3.894268  | 3.759688  | -2.128936 | 109 | 6 | 0 | -9.155428 | -2.015719 | -1.864009 |
| 11     | 8      | 0    | -1.215568 | 0.856293  | -0.529934 | 110 | 1 | 0 | -4.633386 | 2.584076  | -3.237032 |
| 12     | 15     | 0    | 0.153166  | 0.073872  | -0.180854 | 111 | 1 | 0 | -5.395930 | 1.991946  | -3.805839 |
| 13     | 8      | 0    | 1.143240  | 1.197380  | 0.426835  | 112 | 1 | 0 | -5.190244 | 3.179402  | -2.504656 |
| 14     | 6      | 0    | -5.932101 | -0.953854 | -1.091571 | 113 | 6 | 0 | -4.143657 | 3.273172  | -3.935784 |
| 15     | 6      | 0    | -5.177878 | -0.162038 | -1.958250 | 114 | 1 | 0 | -2.765002 | 0.899070  | -3.584040 |
| 16     | 6      | 0    | -4.252758 | 0.783841  | -1.503136 | 115 | 1 | 0 | -1.977307 | 0.311931  | -3.102927 |
| 17     | 6      | 0    | -4.048606 | 0.928528  | -0.106110 | 116 | 1 | 0 | -3.393638 | 0.215544  | -4.166179 |
| 18     | 6      | 0    | -4.811333 | 0.142021  | 0.795946  | 117 | 6 | 0 | -2.289696 | 1.590682  | -4.290275 |
| 19     | 6      | 0    | -5.732059 | -0.777622 | 0.278794  | 118 | 1 | 0 | -5.989496 | 0.933455  | 2.894892  |
| 20     | 1      | 0    | -5.337321 | -0.267544 | -3.029095 | 119 | 1 | 0 | -6.873900 | 0.309364  | 2.718560  |
| 21     | 1      | 0    | -6.321418 | -1.366039 | 0.976568  | 120 | 1 | 0 | -5.889595 | 1.072938  | 3.978150  |
| 22     | 6      | 0    | 6.125049  | -0.114955 | -0.434362 | 121 | 6 | 0 | -6.186436 | 1.912933  | 2.444831  |
| 23     | 6      | 0    | 5.356266  | -0.153628 | -1.599207 | 122 | 1 | 0 | -4.462672 | -1.071205 | 3.018580  |
| 24     | 6      | 0    | 4.208512  | 0.630776  | -1.766793 | 123 | 1 | 0 | -3.569613 | -1.566251 | 2.628188  |
| 25     | 6      | 0    | 3.818979  | 1.499494  | -0.718864 | 124 | 1 | 0 | -4.311381 | -0.912447 | 4.092476  |
| 26     | 6      | 0    | 4.569753  | 1.542584  | 0.480899  | 125 | 6 | 0 | -5.306496 | -1.761582 | 2.903831  |
| 27     | 6      | 0    | 5.703334  | 0.730214  | 0.594573  | 126 | 1 | 0 | 4.225964  | 1.247909  | -4.228302 |
| 28     | 1      | 0    | 5.662322  | -0.805279 | -2.413161 | 127 | 1 | 0 | 3.657393  | 1.208936  | -5.160721 |
| 29     | 1      | 0    | 6.292693  | 0.768107  | 1.506746  | 128 | 1 | 0 | 4.420228  | 2.300545  | -3.990466 |
| 30     | 8      | 0    | 0.592103  | -0.744170 | -1.324878 | 129 | 6 | 0 | 5.194273  | 0.763512  | -4.399257 |
| 31     | 1      | 0    | 0.284705  | -1.902790 | 1.050281  | 130 | 1 | 0 | 3.114818  | -0.905852 | -3.491866 |
| 32     | 7      | 0    | -0.025365 | -0.918721 | 1.190697  | 131 | 1 | 0 | 2.511081  | -0.907776 | -4.407131 |
| 33     | 16     | 0    | -0.517080 | -0.547751 | 2.736440  | 132 | 1 | 0 | 4.016935  | -1.494705 | -3.696348 |
| 34     | 8      | 0    | -0.828603 | -1.809899 | 3.396723  | 133 | 6 | 0 | 2.536900  | -1.402112 | -2.708638 |
| 35     | 8      | 0    | -1.433250 | 0.583244  | 2.693449  | 134 | 1 | 0 | 8.508580  | -0.391826 | -1.233348 |
| 36     | 6      | 0    | 0.999076  | 0.111502  | 3.638730  | 135 | 1 | 0 | 8.219422  | -0.506502 | -2.284844 |
| 37     | 9      | 0    | 2.063724  | -0.666346 | 3.400063  | 136 | 1 | 0 | 8.700138  | 0.671857  | -1.054726 |
| 38     | 9      | 0    | 1.265740  | 1.357221  | 3.262392  | 137 | 6 | 0 | 9.447131  | -0.938755 | -1.082309 |
| 39     | 9      | 0    | 0.725341  | 0.087361  | 4.941841  | 138 | 1 | 0 | 7.189898  | -2.433159 | -0.511182 |
| 40     | 6      | 0    | 1.892752  | 4.550739  | -1.963456 | 139 | 1 | 0 | 6.436822  | -2.828541 | 0.178921  |
| 41     | 6      | 0    | 0.600009  | 4.384134  | -1.371866 | 140 | 1 | 0 | 8.853156  | -2.647493 | -1.532347 |
| 42     | 6      | 0    | -1.417795 | 4.201442  | 1.054369  | 141 | 6 | 0 | 8.124011  | -2.984166 | -0.349310 |
| 43     | 6      | 0    | -2.783536 | 4.171000  | 1.476546  | 142 | 1 | 0 | 4.971490  | 3.849735  | 1.430619  |
| 44     | 6      | 0    | -1.788042 | -5.340179 | 1.787457  | 143 | 1 | 0 | 6.056348  | 3.694777  | 1.473152  |
| 45     | 6      | 0    | -2.160265 | -4.228473 | 1.127762  | 144 | 1 | 0 | 4.735648  | 4.314200  | 0.467830  |
| 46     | 6      | 0    | -2.583087 | -4.199888 | -0.314846 | 145 | 6 | 0 | 4.699162  | 4.556197  | 2.224378  |
| 47     | 8      | 0    | 1.326855  | -5.848026 | 0.386160  | 146 | 1 | 0 | 4.487806  | 1.944839  | 3.017524  |
| 48     | 5      | 0    | 0.548319  | -4.753951 | 0.067376  | 147 | 1 | 0 | 4.031638  | 0.959726  | 3.147883  |
| 49     | 8      | 0    | -0.362885 | -4.855014 | -0.919913 | 148 | 1 | 0 | 5.559370  | 1.852905  | 3.228601  |
| 50     | 8      | 0    | 1.012218  | -3.579523 | 0.675134  | 149 | 6 | 0 | 4.067857  | 2.617280  | 3.774365  |
| 51     | 6      | 0    | -1.376512 | -3.903041 | -1.239465 | 150 | 1 | 0 | 2.131917  | 5.652824  | -2.828330 |
| 52     | 6      | 0    | 2.301649  | -3.913700 | 1.303429  | 151 | 6 | 0 | 3.123995  | 5.768480  | -3.257892 |
| 53     | 6      | 0    | 2.641267  | -5.288842 | 0.610353  | 152 | 1 | 0 | -0.419508 | 5.310476  | -1.726912 |
| 54     | 6      | 0    | 3.285292  | -5.116928 | -0.776645 | 153 | 6 | 0 | -1.417214 | 5.183772  | -1.325562 |
| 55     | 6      | 0    | 3.460325  | -6.263252 | 1.449985  | 154 | 1 | 0 | -0.161744 | 6.357298  | -2.584215 |
| 56     | 6      | 0    | 3.282711  | -2.786783 | 0.992373  | 155 | 6 | 0 | -0.961168 | 7.045034  | -2.845813 |
| 57     | 6      | 0    | 2.077526  | -4.054116 | 2.811646  | 156 | 1 | 0 | 1.129010  | 6.543009  | -3.131635 |
| 58     | 1      | 0    | -1.471326 | -5.295113 | 2.824568  | 157 | 6 | 0 | 1.319866  | 7.378211  | -3.799693 |
| 59     | 1      | 0    | -1.832476 | -6.321912 | 1.323324  | 158 | 1 | 0 | -0.605173 | 5.284546  | 1.485954  |
| 60     | 1      | 0    | -2.100158 | -3.279203 | 1.650797  | 159 | 6 | 0 | 4.044035  | 5.308968  | 1.200196  |
| 61     | 1      | 0    | -3.008107 | -5.170023 | -0.595014 | 160 | 1 | 0 | -3.291479 | 5.230533  | 2.274450  |
| 62     | 1      | 0    | -3.353007 | -3.436757 | -0.466030 | 161 | 6 | 0 | -4.334686 | 5.196480  | 2.578955  |
| 63     | 1      | 0    | -1.006383 | -2.891707 | -1.033007 | 162 | 1 | 0 | -2.479890 | 6.268805  | 2.670086  |
| 64     | 1      | 0    | 2.734092  | -4.407398 | -1.400964 | 163 | 6 | 0 | -2.875888 | 7.068559  | 3.289681  |
| 65     | 1      | 0    | 3.288233  | -6.086177 | -1.283721 | 164 | 6 | 0 | -1.121108 | 6.286523  | 2.278720  |
| 66     | 1      | 0    | 4.321177  | -4.767409 | -0.699338 |     |   |   | -0.476097 | 7.095998  | 2.609414  |
| 67     | 1      | 0    | 3.619836  | -7.186789 | 0.883990  |     |   |   |           |           |           |
| 68     | 1      | 0    | 2.945311  | -6.522719 | 2.378726  |     |   |   |           |           |           |
| 69     | 1      | 0    | 4.441964  | -5.842309 | 1.698519  |     |   |   |           |           |           |
| 70     | 1      | 0    | 2.982191  | -1.866500 | 1.500202  |     |   |   |           |           |           |
| 71     | 1      | 0    | 3.342774  | -2.576395 | -0.077126 |     |   |   |           |           |           |
| 72     | 1      | 0    | 4.285013  | -3.046827 | 1.354666  |     |   |   |           |           |           |
| 73     | 1      | 0    | 1.379166  | -4.868533 | 3.025308  |     |   |   |           |           |           |
| 74     | 1      | 0    | 1.651367  | -3.133237 | 3.214610  |     |   |   |           |           |           |
| 75     | 1      | 0    | 3.019350  | -4.252291 | 3.333302  |     |   |   |           |           |           |
| 76     | 6      | 0    | -1.643297 | -4.008385 | -2.771158 | 1   | 6 | 0 | 0.390277  | 3.227272  | -0.692216 |
| 77     | 6      | 0    | -1.934562 | -5.462380 | -3.190505 | 2   | 6 | 0 | 0.990718  | 2.507015  | 0.251740  |
| 78     | 1      | 0    | -2.850389 | -5.848188 | -2.726882 | 3   | 6 | 0 | 2.200183  | 1.647995  | 0.017631  |
| 79     | 1      | 0    | -2.073666 | -5.514301 | -4.277326 | 4   | 8 | 0 | -1.405419 | -0.438635 | -1.321492 |
| 80     | 1      | 0    | -1.110235 | -6.126408 | -2.917194 | 5   | 5 | 0 | -0.411598 | -0.206945 | -0.400258 |
| 81     | 6      | 0    | -0.383186 | -3.513785 | -3.514147 | 6   | 8 | 0 | 0.899307  | -0.210132 | -0.735984 |
| 82     | 1      | 0    | -0.539702 | -3.553703 | -4.599176 | 7   | 8 | 0 | -0.889345 | -0.035443 | 0.884453  |
| 83     | 1      | 0    | -0.139579 | -2.481931 | -3.238251 | 8   | 6 | 0 | 1.880124  | 0.163064  | 0.228977  |
| 84     | 1      | 0    | 0.481372  | -4.141612 | -3.275164 | 9   | 6 | 0 | -2.321526 | 0.075192  | 0.771600  |
| 85     | 6      | 0    | -2.832704 | -3.110580 | -3.155262 | 10  | 6 | 0 | -2.605227 | -0.685726 | -0.566408 |
| 86     | 1      | 0    | -2.700891 | -2.085130 | -2.792028 | 11  | 6 | 0 | -2.709413 | -2.197470 | -0.368382 |
| 87     | 1      | 0    | -2.932386 | -3.066331 | -4.246415 | 12  | 6 | 0 | -3.800130 | -0.169610 | -1.351521 |
| 88     | 1      | 0    | -3.779616 | -3.489318 | -2.754727 | 13  | 6 | 0 | -2.963684 | -0.539837 | 2.004474  |
| 89     | 6      | 0    | 4.223181  | 2.512345  | 1.611794  | 14  | 6 | 0 | -2.654683 | 1.562878  | 0.679471  |
| 90     | 1      | 0    | 3.150882  | 2.726639  | 1.556239  | 15  | 1 | 0 | -0.486383 | 3.831585  | -0.478763 |
| 91     | 6      | 0    | 3.449544  | 0.543330  | -3.092351 | 16  | 1 | 0 | 0.762949  | 3.242235  | -1.713410 |
| 92     | 1      | 0    | 2.495099  | 1.064089  | -2.970930 | 17  | 1 | 0 | 0.582612  | 2.498879  | 1.262980  |
| 93     | 6      | 0    | 7.408299  | -0.925074 | -0.294389 | 18  | 1 | 0 | 2.561728  | 1.794078  | -1.006104 |
| 94     | 1      | 0    | 7.763545  | -0.789600 | 0.736513  | 19  | 1 | 0 | 3.000511  | 1.944394  | 0.706282  |
| 95     | 6      | 0    | -3.586287 | 1.685499  | -2.546252 | 20  | 1 | 0 | 1.459661  | 0.034450  | 1.237038  |
| 96     | 1      | 0    | -2.893206 | 2.357444  | -2.032557 | 21  | 1 | 0 | -1.861831 | -2.572264 | 0.214669  |
| 97     | 6      | 0    | -4.717994 | 0.276179  | 2.317325  | 22  | 1 | 0 | -2.691051 | -2.681490 | -1.348293 |

**product 4a (B3LYP)**

B3LYP/6-31g(d); E(REB3LYP) = -800.419849 hartree

Sum of electronic and thermal Free Energies= -800.068357 hartree

Thermal correction to Gibbs Free Energy= 0.351492 hartree

| Center Number | Atomic Number | Atomic Type | Coordinates (Angstroms) |           |           |
|---------------|---------------|-------------|-------------------------|-----------|-----------|
|               |               |             | X                       | Y         | Z         |
| 1             | 6             | 0           | 0.390277                | 3.227272  | -0.692216 |
| 2             | 6             | 0           | 0.990718                | 2.507015  | 0.251740  |
| 3             | 6             | 0           | 2.200183                | 1.647995  | 0.017631  |
| 4             | 8             | 0           | -1.405419               | -0.438635 | -1.321492 |
| 5             | 5             | 0           | -0.411598               | -0.206945 | -0.400258 |
| 6             | 8             | 0           | 0.899307                | -0.210132 | -0.735984 |
| 7             | 8             |             |                         |           |           |

|    |   |   |           |           |           |    |    |   |           |           |           |
|----|---|---|-----------|-----------|-----------|----|----|---|-----------|-----------|-----------|
| 23 | 1 | 0 | -3.636138 | -2.474803 | 0.143008  | 2  | 6  | 0 | -1.543874 | 0.800964  | -0.208072 |
| 24 | 1 | 0 | -3.920854 | -0.760880 | -2.263433 | 3  | 6  | 0 | -2.954975 | 0.862961  | -0.039396 |
| 25 | 1 | 0 | -3.663925 | 0.874806  | -1.638222 | 4  | 6  | 0 | -3.474788 | 2.042967  | 0.427031  |
| 26 | 1 | 0 | -4.717744 | -0.259164 | -0.760028 | 5  | 1  | 0 | -4.551399 | 2.133929  | 0.553351  |
| 27 | 1 | 0 | -2.714239 | 0.058879  | 2.885067  | 6  | 6  | 0 | 3.245236  | 1.754982  | -1.794320 |
| 28 | 1 | 0 | -2.607044 | -1.558024 | 2.171528  | 7  | 6  | 0 | 0.650958  | 1.869567  | -0.700388 |
| 29 | 1 | 0 | -4.053944 | -0.558781 | 1.900758  | 8  | 6  | 0 | 1.554527  | 0.887559  | -0.368332 |
| 30 | 1 | 0 | -2.213639 | 2.001908  | -0.220328 | 9  | 6  | 0 | 2.867280  | 0.789839  | -0.893362 |
| 31 | 1 | 0 | -2.233029 | 2.073088  | 1.550580  | 10 | 1  | 0 | 4.255150  | 1.732877  | -2.196992 |
| 32 | 1 | 0 | -3.735762 | 1.731569  | 0.664778  | 11 | 8  | 0 | -1.034244 | -0.429033 | -0.609897 |
| 33 | 6 | 0 | 3.078224  | -0.799176 | 0.095243  | 12 | 15 | 0 | 0.156524  | -1.218900 | 0.122608  |
| 34 | 6 | 0 | 3.712732  | -0.696978 | -1.295455 | 13 | 8  | 0 | 1.176105  | -0.066328 | 0.576212  |
| 35 | 1 | 0 | 4.198294  | 0.272611  | -1.448617 | 14 | 6  | 0 | -5.568554 | -2.348582 | -1.264820 |
| 36 | 1 | 0 | 4.477848  | -1.471443 | -1.417362 | 15 | 6  | 0 | -4.750117 | -1.686310 | -2.179283 |
| 37 | 1 | 0 | 2.956439  | -0.833366 | -2.073959 | 16 | 6  | 0 | -3.876309 | -0.669679 | -1.802535 |
| 38 | 6 | 0 | 2.561343  | -2.227391 | 0.312184  | 17 | 6  | 0 | -3.833794 | -0.276725 | -0.444221 |
| 39 | 1 | 0 | 3.392188  | -2.940621 | 0.286515  | 18 | 6  | 0 | -4.668758 | -0.913411 | 0.493638  |
| 40 | 1 | 0 | 2.065446  | -2.319931 | 1.286122  | 19 | 6  | 0 | -5.512731 | -1.943839 | 0.063974  |
| 41 | 1 | 0 | 1.844985  | -2.505389 | -0.465167 | 20 | 1  | 0 | -4.786760 | -1.992028 | -3.224515 |
| 42 | 6 | 0 | 4.120485  | -0.481177 | 1.173109  | 21 | 1  | 0 | -6.137858 | -2.440519 | 0.801991  |
| 43 | 1 | 0 | 3.670642  | -0.479830 | 2.173253  | 22 | 6  | 0 | 5.886833  | -2.134013 | -0.003736 |
| 44 | 1 | 0 | 4.909748  | -1.240348 | 1.163339  | 23 | 6  | 0 | 5.080799  | -2.260168 | -1.133048 |
| 45 | 1 | 0 | 4.598242  | 0.489953  | 1.010567  | 24 | 6  | 0 | 4.043979  | -1.365764 | -1.405244 |

**pivalaldehyde (1a) (M06-2X)**

M06-2X/6-31g(d); E(RM062X) = -271.637576 hartree  
 Sum of electronic and thermal Free Energies = -271.525525 hartree  
 Thermal correction to Gibbs Free Energy = 0.112051 hartree

| Center Number | Atomic Number | Atomic Type | Coordinates (Angstroms) |           |           |
|---------------|---------------|-------------|-------------------------|-----------|-----------|
|               |               |             | X                       | Y         | Z         |
| 1             | 8             | 0           | 0.362237                | -0.160592 | -2.385899 |
| 2             | 6             | 0           | -0.452355               | 0.754668  | -2.735138 |
| 3             | 1             | 0           | -0.273408               | 1.767454  | -2.371042 |
| 4             | 6             | 0           | -1.103624               | 0.650992  | -4.094553 |
| 5             | 6             | 0           | -1.489971               | -0.782511 | -4.452077 |
| 6             | 1             | 0           | -2.320227               | -1.141663 | -3.835584 |
| 7             | 1             | 0           | -1.810684               | -0.823740 | -5.497948 |
| 8             | 1             | 0           | -0.642484               | -1.459986 | -4.320518 |
| 9             | 6             | 0           | 0.016950                | 1.140049  | -5.046099 |
| 10            | 1             | 0           | -0.368586               | 1.150433  | -6.071141 |
| 11            | 1             | 0           | 0.346166                | 2.149891  | -4.781420 |
| 12            | 1             | 0           | 0.880231                | 0.468516  | -5.002827 |
| 13            | 6             | 0           | -2.289746               | 1.607758  | -4.194304 |
| 14            | 1             | 0           | -2.051655               | 2.586454  | -3.759083 |
| 15            | 1             | 0           | -2.559191               | 1.768746  | -5.244285 |
| 16            | 1             | 0           | -3.171591               | 1.215942  | -3.678739 |

**2-allyl-4,4,5,5-tetramethyl-1,3,2-dioxaborolane (2) (M06-2X)**

M06-2X/6-31g(d); E(RM062X) = -528.350484 hartree  
 Sum of electronic and thermal Free Energies = -528.134194 hartree  
 Thermal correction to Gibbs Free Energy = 0.216290 hartree

| Center Number | Atomic Number | Atomic Type | Coordinates (Angstroms) |           |           |
|---------------|---------------|-------------|-------------------------|-----------|-----------|
|               |               |             | X                       | Y         | Z         |
| 1             | 6             | 0           | -0.763985               | -5.068723 | 1.889761  |
| 2             | 6             | 0           | -1.779162               | -4.066903 | 1.652895  |
| 3             | 6             | 0           | -2.651142               | -4.086864 | 0.602372  |
| 4             | 8             | 0           | 1.652133                | -5.426406 | 0.969263  |
| 5             | 5             | 0           | 0.507109                | -4.600027 | 0.879042  |
| 6             | 8             | 0           | 0.955595                | -3.215940 | 1.102136  |
| 7             | 6             | 0           | 2.369437                | -3.247848 | 1.389978  |
| 8             | 6             | 0           | 2.788611                | -4.597970 | 0.732242  |
| 9             | 6             | 0           | 2.996167                | -4.449948 | -0.779187 |
| 10            | 6             | 0           | 4.004838                | -5.251791 | 1.370982  |
| 11            | 6             | 0           | 3.045945                | -2.025650 | 0.788326  |
| 12            | 6             | 0           | 2.524507                | -3.263238 | 2.909748  |
| 13            | 1             | 0           | -0.350155               | -5.041711 | 2.899804  |
| 14            | 1             | 0           | -1.049840               | -6.082857 | 1.602691  |
| 15            | 1             | 0           | -1.689048               | -3.145426 | 2.229602  |
| 16            | 1             | 0           | -2.887818               | -5.026186 | 0.107907  |
| 17            | 1             | 0           | -3.331902               | -3.254737 | 0.435380  |
| 18            | 1             | 0           | 2.165146                | -3.903060 | -1.236536 |
| 19            | 1             | 0           | 3.039530                | -5.448460 | -1.223361 |
| 20            | 1             | 0           | 3.925618                | -3.918034 | -1.009464 |
| 21            | 1             | 0           | 4.252375                | -6.169642 | 0.829957  |
| 22            | 1             | 0           | 3.803700                | -5.513606 | 2.411894  |
| 23            | 1             | 0           | 4.874233                | -4.585858 | 1.333432  |
| 24            | 1             | 0           | 2.716023                | -1.110256 | 1.288571  |
| 25            | 1             | 0           | 2.826282                | -1.920992 | -0.276129 |
| 26            | 1             | 0           | 4.132171                | -2.090689 | 0.918356  |
| 27            | 1             | 0           | 2.089512                | -4.174265 | 3.331500  |
| 28            | 1             | 0           | 1.998013                | -2.403257 | 3.334649  |
| 29            | 1             | 0           | 3.576745                | -3.203985 | 3.205745  |

**(R)-3d (M06-2X)**

M06-2X/6-31g(d); E(RM062X) = -3446.607067 hartree  
 Sum of electronic and thermal Free Energies = -3445.708017 hartree  
 Thermal correction to Gibbs Free Energy = 0.899051 hartree

| Center Number | Atomic Number | Atomic Type | Coordinates (Angstroms) |          |           |
|---------------|---------------|-------------|-------------------------|----------|-----------|
|               |               |             | X                       | Y        | Z         |
| 1             | 6             | 0           | -0.715706               | 1.896620 | -0.111277 |



Thermal correction to Gibbs Free Energy= 1.282979 hartree

| Center Number | Atomic Number | Atomic Type | Coordinates (Angstroms) |           |           |     |   |   |           |           |           |
|---------------|---------------|-------------|-------------------------|-----------|-----------|-----|---|---|-----------|-----------|-----------|
|               |               |             | X                       | Y         | Z         |     |   |   |           |           |           |
| 1             | 6             | 0           | -0.868083               | 2.991403  | 0.331669  | 95  | 6 | 0 | -3.298607 | 1.709131  | -2.691301 |
| 2             | 6             | 0           | -1.665622               | 1.906975  | 0.038633  | 96  | 1 | 0 | -2.601339 | 2.318366  | -2.110043 |
| 3             | 6             | 0           | -3.064572               | 1.875994  | 0.290310  | 97  | 6 | 0 | -4.572426 | -0.107258 | 1.955219  |
| 4             | 6             | 0           | -3.578333               | 2.891768  | 1.057677  | 98  | 1 | 0 | -3.865586 | 0.655116  | 2.284144  |
| 5             | 1             | 0           | -4.647010               | 2.906875  | 1.260735  | 99  | 6 | 0 | -7.086398 | -1.551105 | -2.160636 |
| 6             | 6             | 0           | 2.967458                | 3.450903  | -1.559838 | 100 | 1 | 0 | -7.067230 | -1.350563 | -3.239652 |
| 7             | 6             | 0           | 0.451031                | 3.168148  | -0.332713 | 101 | 6 | 0 | -6.848634 | -3.052046 | -1.956227 |
| 8             | 6             | 0           | 1.421181                | 2.197588  | -0.262969 | 102 | 1 | 0 | -7.654263 | -3.634798 | -2.414902 |
| 9             | 6             | 0           | 2.704704                | 2.301334  | -0.854654 | 103 | 1 | 0 | -5.899594 | -3.368676 | -2.398397 |
| 10            | 1             | 0           | 3.950948                | 3.581004  | -2.005176 | 104 | 1 | 0 | -6.821629 | -3.299837 | -0.888647 |
| 11            | 8             | 0           | -1.137717               | 0.815760  | -0.647344 | 105 | 6 | 0 | -8.465704 | -1.144240 | -1.629339 |
| 12            | 15            | 0           | 0.142592                | -0.033041 | -0.182965 | 106 | 1 | 0 | -8.546123 | -1.351955 | -0.556695 |
| 13            | 8             | 0           | 1.139116                | 1.043891  | 0.469966  | 107 | 1 | 0 | -8.646917 | -0.075957 | -1.778970 |
| 14            | 6             | 0           | -5.988682               | -0.717674 | -1.526480 | 108 | 1 | 0 | -9.255842 | -1.705412 | -2.138688 |
| 15            | 6             | 0           | -5.146525               | 0.073285  | -2.300145 | 109 | 6 | 0 | -4.164973 | 2.683682  | -3.499270 |
| 16            | 6             | 0           | -4.144366               | 0.870955  | -1.741776 | 110 | 1 | 0 | -4.857990 | 2.150317  | -4.158307 |
| 17            | 6             | 0           | -3.984032               | 0.877917  | -0.340702 | 111 | 1 | 0 | -4.755301 | 3.325690  | -2.838250 |
| 18            | 6             | 0           | -4.800121               | 0.050963  | 0.461088  | 112 | 1 | 0 | -3.532863 | 3.321009  | -4.126261 |
| 19            | 6             | 0           | -5.785076               | -0.725275 | -0.147511 | 113 | 6 | 0 | -2.467546 | 0.812654  | -3.618624 |
| 20            | 1             | 0           | -5.280236               | 0.075299  | -3.380519 | 114 | 1 | 0 | -1.818475 | 0.142713  | -3.046842 |
| 21            | 1             | 0           | -6.406604               | -1.364717 | 0.476829  | 115 | 1 | 0 | -3.116783 | 0.199618  | -2.254267 |
| 22            | 6             | 0           | 6.016256                | -0.427947 | -0.666829 | 116 | 1 | 0 | -1.838789 | 1.424797  | -4.273962 |
| 23            | 6             | 0           | 5.190932                | -0.384938 | -1.788417 | 117 | 6 | 0 | -5.850997 | 0.052808  | 2.782175  |
| 24            | 6             | 0           | 4.061464                | 0.436061  | -1.844804 | 118 | 1 | 0 | -6.586499 | -0.725588 | 2.553173  |
| 25            | 6             | 0           | 3.761705                | 1.247579  | -0.734061 | 119 | 1 | 0 | -5.618756 | -0.018519 | 3.849483  |
| 26            | 6             | 0           | 4.536207                | 1.165522  | 0.439937  | 120 | 1 | 0 | -6.323347 | 1.023355  | 2.598472  |
| 27            | 6             | 0           | 5.655677                | 0.333069  | 0.444103  | 121 | 6 | 0 | -3.913399 | -1.468737 | 2.210549  |
| 28            | 1             | 0           | 5.440325                | -0.993475 | -2.655642 | 122 | 1 | 0 | -3.042303 | -1.597782 | 1.554800  |
| 29            | 1             | 0           | 6.277864                | 0.280013  | 1.333945  | 123 | 1 | 0 | -3.580372 | -1.560589 | 3.249993  |
| 30            | 8             | 0           | 0.620267                | -0.893600 | -1.266960 | 124 | 1 | 0 | -4.611745 | -2.287808 | 1.996853  |
| 31            | 1             | 0           | 0.146717                | -1.909706 | 1.160819  | 125 | 6 | 0 | 3.924208  | 1.210352  | -4.234200 |
| 32            | 7             | 0           | -0.187769               | -0.924374 | 1.216534  | 126 | 1 | 0 | 3.307870  | 1.221837  | -5.138958 |
| 33            | 16            | 0           | -0.584677               | -0.389630 | 2.725100  | 127 | 1 | 0 | 4.133243  | 2.246149  | -3.249944 |
| 34            | 8             | 0           | -0.724296               | -1.570696 | 3.549555  | 128 | 1 | 0 | 4.878749  | 0.731004  | -4.480067 |
| 35            | 8             | 0           | -1.591969               | 0.641411  | 2.630918  | 129 | 6 | 0 | 2.850162  | -0.969420 | -3.571732 |
| 36            | 6             | 0           | 0.900931                | 0.495901  | 3.412257  | 130 | 1 | 0 | 2.182685  | -0.915047 | -4.437926 |
| 37            | 9             | 0           | 2.017611                | -0.106818 | 3.024606  | 131 | 1 | 0 | 3.735845  | -1.539501 | -3.873538 |
| 38            | 9             | 0           | 0.917841                | 1.761845  | 3.037130  | 132 | 1 | 0 | 2.328334  | -1.509957 | -2.779290 |
| 39            | 9             | 0           | 0.807692                | 0.432936  | 4.731144  | 133 | 6 | 0 | 8.284001  | -0.744966 | -1.700116 |
| 40            | 6             | 0           | 1.995418                | 4.466940  | -1.738733 | 134 | 1 | 0 | 7.876538  | -0.856813 | -2.710888 |
| 41            | 6             | 0           | 0.711429                | 4.326009  | -1.142421 | 135 | 1 | 0 | 8.507796  | 0.314125  | -1.543553 |
| 42            | 6             | 0           | -1.395718               | 3.990446  | 1.214122  | 136 | 1 | 0 | 9.221077  | -1.309071 | -1.650798 |
| 43            | 6             | 0           | -2.762385               | 3.919545  | 1.595519  | 137 | 6 | 0 | 7.004172  | -2.748687 | -0.865801 |
| 44            | 6             | 0           | -1.211263               | -5.391506 | 2.670986  | 138 | 1 | 0 | 6.314130  | -3.131223 | -0.106593 |
| 45            | 6             | 0           | -1.846735               | -4.396488 | 2.055025  | 139 | 1 | 0 | 6.556130  | -2.927379 | -1.849733 |
| 46            | 6             | 0           | -2.518153               | -4.523754 | 0.716927  | 140 | 1 | 0 | 7.930409  | -3.329888 | -0.810524 |
| 47            | 8             | 0           | 1.778503                | -5.438088 | -0.035248 | 141 | 6 | 0 | 4.798567  | 3.419576  | 1.533431  |
| 48            | 5             | 0           | 0.702894                | -4.588021 | 0.006447  | 142 | 1 | 0 | 5.889405  | 3.358961  | 1.449776  |
| 49            | 8             | 0           | -0.508189               | -4.920976 | -0.477416 | 143 | 1 | 0 | 4.417587  | 3.941189  | 0.651649  |
| 50            | 8             | 0           | 1.033712                | -3.336917 | 0.522068  | 144 | 1 | 0 | 4.557350  | 4.019225  | 2.417602  |
| 51            | 6             | 0           | -1.591938               | -3.999249 | -0.388076 | 145 | 6 | 0 | 4.677442  | 1.376684  | 2.977034  |
| 52            | 6             | 0           | 2.412753                | -3.411832 | 0.963945  | 146 | 1 | 0 | 4.421148  | 0.315532  | 3.034366  |
| 53            | 6             | 0           | 2.947868                | -4.613907 | 0.120913  | 147 | 1 | 0 | 5.761936  | 1.472516  | 3.097825  |
| 54            | 6             | 0           | 3.375728                | -4.187344 | -1.283409 | 148 | 1 | 0 | 4.210531  | 1.890031  | 3.823798  |
| 55            | 6             | 0           | 4.038070                | -5.423912 | 0.801055  | 149 | 6 | 0 | 2.278942  | 5.611744  | -2.529489 |
| 56            | 6             | 0           | 3.106664                | -2.093651 | 0.668568  | 150 | 1 | 0 | 3.269327  | 5.705606  | -2.966747 |
| 57            | 6             | 0           | 2.375025                | -3.696637 | 2.462551  | 151 | 6 | 0 | -0.269064 | 5.319844  | -1.412152 |
| 58            | 1             | 0           | -0.707598               | -5.237902 | 3.620895  | 152 | 1 | 0 | -1.267718 | 5.207967  | -1.005937 |
| 59            | 1             | 0           | -1.183184               | -6.393565 | 2.248654  | 153 | 6 | 0 | 0.030455  | 6.406706  | -2.193631 |
| 60            | 1             | 0           | -1.842225               | -3.405330 | 2.508534  | 154 | 1 | 0 | -0.734734 | 7.150034  | -2.393540 |
| 61            | 1             | 0           | -2.738692               | -5.574874 | 0.501484  | 155 | 6 | 0 | 1.321652  | 6.566040  | -2.749003 |
| 62            | 1             | 0           | -3.461904               | -3.967514 | 0.706360  | 156 | 1 | 0 | 1.543891  | 7.435600  | -3.359152 |
| 63            | 1             | 0           | -1.203930               | -3.013476 | -0.095918 | 157 | 6 | 0 | -0.594019 | 5.037045  | 1.741271  |
| 64            | 1             | 0           | 2.578244                | -3.613776 | -1.768470 | 158 | 1 | 0 | 0.456687  | 5.084394  | 1.472901  |
| 65            | 1             | 0           | 3.566687                | -5.083645 | -1.879634 | 159 | 6 | 0 | -3.292074 | 4.904159  | 2.469282  |
| 66            | 1             | 0           | 4.279202                | -3.570683 | -1.266418 | 160 | 1 | 0 | -4.340909 | 4.840753  | 2.746256  |
| 67            | 1             | 0           | 4.358970                | -6.232933 | 0.139341  | 161 | 6 | 0 | -2.496231 | 5.905522  | 2.961644  |
| 68            | 1             | 0           | 3.678286                | -5.865222 | 1.732747  | 162 | 1 | 0 | -2.907576 | 6.649883  | 3.635866  |
| 69            | 1             | 0           | 4.906816                | -4.793439 | 1.019740  | 163 | 6 | 0 | -1.130705 | 5.965610  | 2.597151  |
| 70            | 1             | 0           | 2.688320                | -1.293420 | 1.283338  | 164 | 1 | 0 | -0.501138 | 6.751351  | 3.002653  |
| 71            | 1             | 0           | 2.996916                | -1.803036 | -0.378297 |     |   |   |           |           |           |
| 72            | 1             | 0           | 4.174798                | -2.165148 | 0.903265  |     |   |   |           |           |           |
| 73            | 1             | 0           | 1.880626                | -4.652159 | 2.663670  |     |   |   |           |           |           |
| 74            | 1             | 0           | 1.804249                | -2.908138 | 2.964531  |     |   |   |           |           |           |
| 75            | 1             | 0           | 3.382167                | -3.717906 | 2.889411  |     |   |   |           |           |           |
| 76            | 6             | 0           | -2.226411               | -3.819308 | -1.779173 |     |   |   |           |           |           |
| 77            | 6             | 0           | -3.001256               | -5.070871 | -2.200226 |     |   |   |           |           |           |
| 78            | 1             | 0           | -3.882214               | -5.233218 | -1.568795 |     |   |   |           |           |           |
| 79            | 1             | 0           | -3.347450               | -4.969284 | -3.234930 |     |   |   |           |           |           |
| 80            | 1             | 0           | -2.363144               | -5.959053 | -2.139743 |     |   |   |           |           |           |
| 81            | 6             | 0           | -1.108501               | -3.535863 | -2.791508 |     |   |   |           |           |           |
| 82            | 1             | 0           | -1.544192               | -3.269209 | -3.761123 |     |   |   |           |           |           |
| 83            | 1             | 0           | -0.481611               | -2.699912 | -2.458052 |     |   |   |           |           |           |
| 84            | 1             | 0           | -0.472580               | -4.414514 | -2.931452 |     |   |   |           |           |           |
| 85            | 6             | 0           | -3.157292               | -2.606161 | -1.725645 |     |   |   |           |           |           |
| 86            | 1             | 0           | -2.614212               | -1.695129 | -1.437381 |     |   |   |           |           |           |
| 87            | 1             | 0           | -3.599455               | -2.422339 | -2.711816 |     |   |   |           |           |           |
| 88            | 1             | 0           | -3.981461               | -2.739764 | -1.016627 |     |   |   |           |           |           |
| 89            | 6             | 0           | 4.205447                | 2.008881  | 1.663515  |     |   |   |           |           |           |
| 90            | 1             | 0           | 3.114368                | 2.100423  | 1.720028  |     |   |   |           |           |           |
| 91            | 6             | 0           | 3.213922                | 0.445817  | -3.109726 |     |   |   |           |           |           |
| 92            | 1             | 0           | 2.273031                | 0.959638  | -2.885494 |     |   |   |           |           |           |
| 93            | 6             | 0           | 7.286410                | -1.258419 | -0.654917 |     |   |   |           |           |           |
| 94            | 1             | 0           | 7.744259                | -1.139261 | 0.335493  |     |   |   |           |           |           |

**product-4a (M06-2X)**

M06-2X/6-31g(d); E(RM062X) = -800.064212 hartree

Sum of electronic and thermal Free Energies= -799.707167 hartree

Thermal correction to Gibbs Free Energy= 0.357045 hartree

| Center Number | Atomic Number | Atomic Type | Coordinates (Angstroms) |           |           |
|---------------|---------------|-------------|-------------------------|-----------|-----------|
|               |               |             | X                       | Y         | Z         |
| 1             | 6             | 0           | 5.051941                | -0.560331 | 1.520551  |
| 2             | 6             | 0           | 3.984078                | -1.118300 | 0.939140  |
| 3             | 6             | 0           | 3.927768                | -1.556882 | -0.500877 |
| 4             | 8             | 0           | 5.239237                | 2.494066  | 0.235840  |
| 5             | 5             | 0           | 4.333736                | 1.533119  | -0.158126 |
| 6             | 8             | 0           | 4.588842                | 0.643692  | -1.136759 |
| 7             | 8             | 0           | 3.050093                | 1.808781  | 0.326758  |
| 8             | 6             | 0           | 3.615435                | -0.359169 | -1.414835 |
| 9             | 6             | 0           | 3.061079                | 3.181323  | 0.791640  |
| 10            | 6             | 0           | 4.318181                | 3.687781  | 0.222321  |
| 11            | 6             | 0           | 4.324351                | 4.113892  | -1.245487 |
| 12            | 6             | 0           | 5.109872                | 4.766765  | 1.043272  |
| 13            | 6             | 0           | 1.839392                | 3.868830  | 0.201399  |
| 14            | 6             | 0           | 3.019277                | 3.173435  | 2.314397  |
| 15            | 1             | 0           | 5.016626                | -0.225400 | 2.525286  |
| 16            | 1             | 0           | 5.994512                | -0.443715 | 0.990995  |
| 17            | 1             | 0           | 3.068034                | -1.216657 | 1.518547  |
| 18            | 1             | 0           | 4.893082                | -1.981959 | -0.799403 |
| 19            | 1             | 0           | 3.15                    |           |           |

|    |   |   |          |           |           |    |   |   |          |           |           |
|----|---|---|----------|-----------|-----------|----|---|---|----------|-----------|-----------|
| 20 | 1 | 0 | 2.622147 | 0.032221  | -1.166526 | 34 | 6 | 0 | 4.994304 | -1.049858 | -3.430360 |
| 21 | 1 | 0 | 3.817877 | 3.350017  | -1.844922 | 35 | 1 | 0 | 5.299745 | -2.017909 | -3.017699 |
| 22 | 1 | 0 | 5.335517 | 4.238609  | -1.640679 | 36 | 1 | 0 | 4.985140 | -1.145388 | -4.521887 |
| 23 | 1 | 0 | 3.780100 | 5.056188  | -1.358339 | 37 | 1 | 0 | 5.745761 | -0.304133 | -3.155455 |
| 24 | 1 | 0 | 6.047799 | 5.054518  | 0.560858  | 38 | 6 | 0 | 3.186194 | 0.666495  | -3.639262 |
| 25 | 1 | 0 | 5.336967 | 4.413138  | 2.050943  | 39 | 1 | 0 | 3.092973 | 0.494666  | -4.717430 |
| 26 | 1 | 0 | 4.471477 | 5.653930  | 1.112582  | 40 | 1 | 0 | 2.220486 | 1.016552  | -3.257215 |
| 27 | 1 | 0 | 0.924076 | 3.465841  | 0.643821  | 41 | 1 | 0 | 3.933056 | 1.452002  | -3.484532 |
| 28 | 1 | 0 | 1.777061 | 3.707441  | -0.875995 | 42 | 6 | 0 | 2.572935 | -1.717491 | -3.231835 |
| 29 | 1 | 0 | 1.863870 | 4.945943  | 0.403253  | 43 | 1 | 0 | 1.595576 | -1.444791 | -2.812563 |
| 30 | 1 | 0 | 3.887987 | 2.650909  | 2.725329  | 44 | 1 | 0 | 2.455272 | -1.835953 | -4.314772 |
| 31 | 1 | 0 | 2.119114 | 2.655965  | 2.658124  | 45 | 1 | 0 | 2.865982 | -2.687672 | -2.816459 |
| 32 | 1 | 0 | 2.992288 | 4.192851  | 2.710085  |    |   |   |          |           |           |
| 33 | 6 | 0 | 3.609141 | -0.629821 | -2.931743 |    |   |   |          |           |           |

## 9-2. Calculation results of transition states by B3LYP

We calculated four transition states for *re*-face attack and *si*-face attack considering axial and equatorial models respectively (Figure S1). DFT calculation was performed using Gaussian 16. We first optimized geometries of four transition states using the B3LYP density function and 6-31G(d) basis set, in which the level of theory was used in previous works by Goodman and Houk. As a result, the transition state Re\_A, which was *re*-face attack with a bidentate chelation via hydrogen bonding of the phosphoryl oxygen of the catalyst with the hydrogen atom of the formyl group (2.58 Å) and the hydrogen bond between axial boronate oxygen and hydrogen atom (N-H) of the catalyst (1.77 Å), gave the lowest energy. However, Re\_A is found to be favored of only 0.1 kcal/mol lower in energy than the transition state Si\_E, which was *si*-face attack via the equatorial coordination model to give the minor enantiomer. The energy difference between Re\_A and Si\_E is not in good agreement with the enantioselectivity observed experimentally (95% ee, theoretically ca. 2.2 kcal/mol). Interestingly, in the case of the transition state Re\_E, unlike the Houk's results using benzaldehyde as a substrate, the hydrogen bonding between the hydrogen atom of the olefin in allylboronic reagent and the phosphoryl oxygen of the catalyst was observed. Moreover, DFT calculation showed that hydrogen bonding between the methylene hydrogen atom of the allylboronic reagent and the phosphoryl oxygen is formed (2.46 Å) in the transition state Si\_E. As shown above, several hydrogen bonds were observed in our system that were not found in the benzaldehyde system reported by Goodman and Houk. As opposed to chiral phosphoric acid catalysts, chiral phosphoramidate catalyst (*R*)-**3e** possesses a sulfonic moiety and a CF<sub>3</sub> group that can interact with pivalaldehyde and pinacol boronic acid ester through weak hydrogen bonding. Furthermore, pivalaldehyde does not have an acidic sp<sup>2</sup> hydrogen atom like phenyl group, which plays an important role for stabilization of the equatorial transition state in Houk model. We thought that weak interactions such as C-F⋯H interaction between phosphoramidate catalyst (*R*)-**3e** and allylboronic agent **2** would be important in the calculations because our allylation reaction was found to be different to well-studied allylation reactions with benzaldehyde using chiral phosphoric acid in the preliminary DFT calculation. Thus, we performed optimization of geometries again by M06-2X/6-31G(d) level of theory (See the main text).

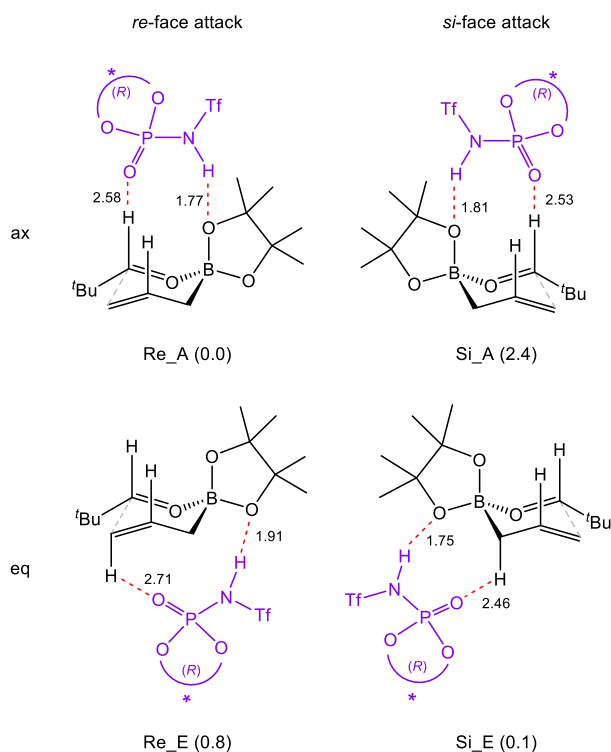

Figure S1. Schematic optimized transition state models of different mechanisms (Goodman and Houk model) at the B3LYP/6-31G(d) level of theory. Bond lengths are given in Å. Relative energies (kcal/mol) are shown in parentheses.

### 9-3. Potential energy surface of the allylboration

We prepared an energy diagram for comparison of B3LYP vs. M06-2X with 6-31G(d) basis set to understand the effect of weak interactions for calculation results in detail (Figure 4). When B3LYP was used, the transition structure Re\_A are found to be high in free energy exhibiting barrier of 32.9 kcal/mol. This energy barrier is too high for such a fast reaction at 25 °C (<0.1 h) in Table 1, entry 18. On the other hand, when M06-2X was used in the calculation, the relative energies of transition states Re\_A and Si\_E are considerably lower with barriers of 5.6 kcal/mol and 9.8 kcal/mol, respectively. These results are much more reasonable for the present phosphoramidate catalyzed reaction that proceeds within only 10 min at 25 °C. These results indicate that M06-2X is a much better function than B3LYP for finding transition states and comparing Gibbs free energies of the corresponding transitions states in the present enantioselective allylation reaction using the chiral phosphoramidate catalyst with several functional groups that can interact with pivalaldehyde (**1**) and allylboron reagent **2** in multiple manner.



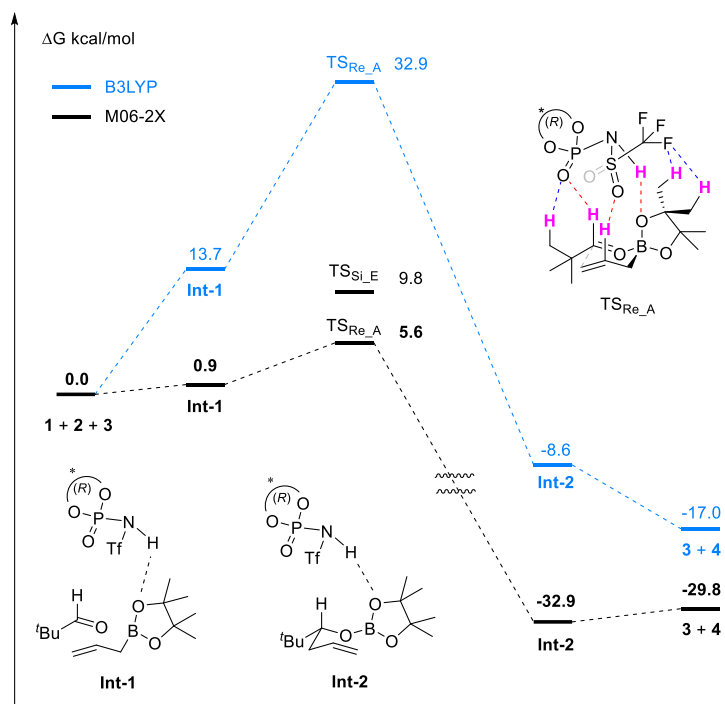

Figure S2. Potential energy surface displaying the free energies ( $\Delta G$ ) of the enantioselective allylation pathway with (black) and without dispersion (blue). Level of theory: M06-2X/6-31g(d) and B3LYP/6-31g(d). Energies are given in kcal/mol.

#### 9-4. Summary of other calculation methods

| M06-2X/6-31G(d)             | Re_A | Si_A | Re_E | Si_E |
|-----------------------------|------|------|------|------|
| $\Delta\Delta G$ (kcal/mol) | 0.0  | 4.8  | 14.2 | 4.2  |

| MN15-2X/6-31G(d)+SMD<br>(toluene) | Re_A | Si_A | Re_E | Si_E |
|-----------------------------------|------|------|------|------|
| $\Delta\Delta G$ (kcal/mol)       | 0.0  | 3.4  | 11.1 | 3.0  |

| B3LYP-D3(BJ)/6-311G(d,p)    | Re_A | Si_A | Re_E | Si_E |
|-----------------------------|------|------|------|------|
| $\Delta\Delta G$ (kcal/mol) | 0.0  | 5.9  | 17.1 | 5.4  |

| $\omega$ B97XD/6-31G(d)     | Re_A | Si_A | Re_E | Si_E |
|-----------------------------|------|------|------|------|
| $\Delta\Delta G$ (kcal/mol) | 0.0  | 5.2  | 14.1 | 4.7  |

Similar tendency of energy differences as with M06-2X or MN15 was observed by using B3LYP-D3(BJ)/6-311G(d,p) and  $\omega$ B97XD/6-31G(d).

9-5. Fig 3. with schematic models

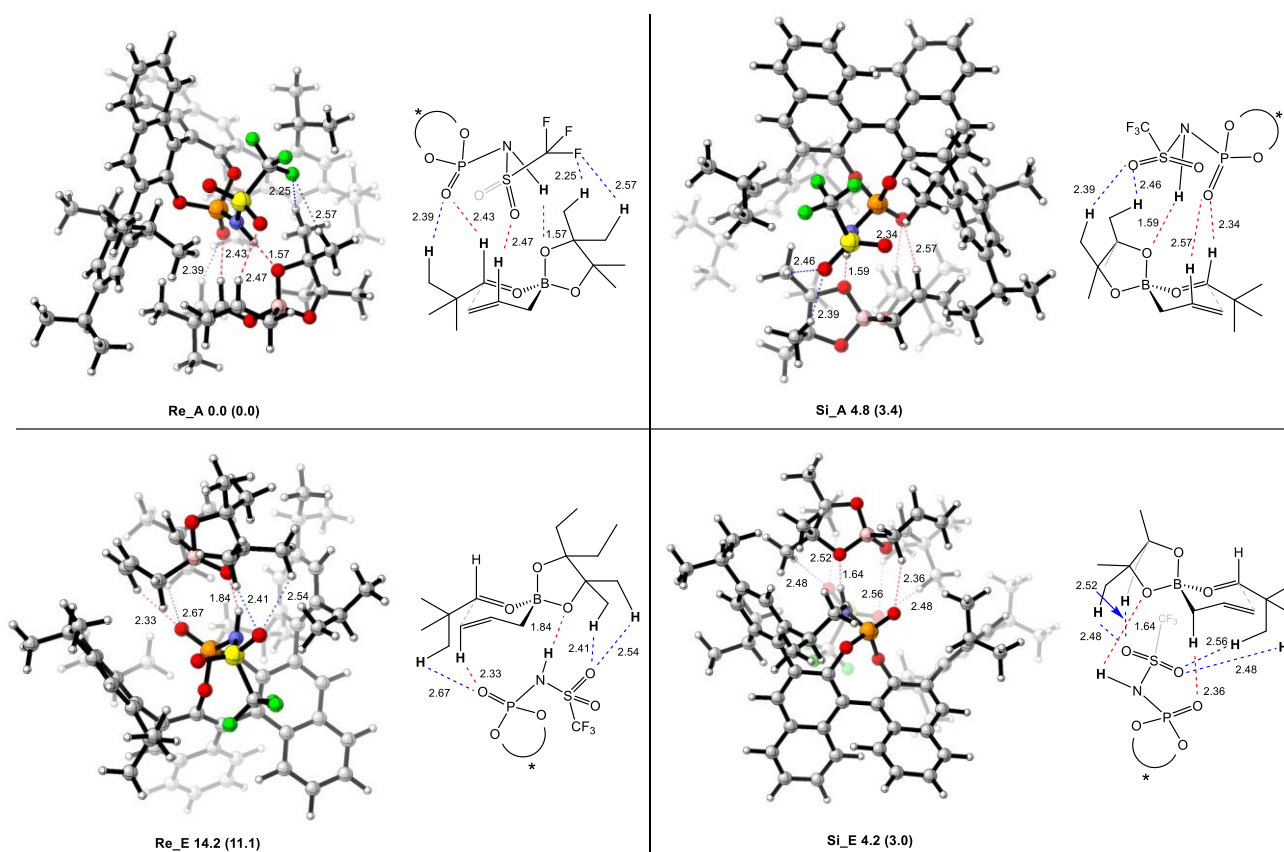

**Fig. 3** Optimized transition states of Re\_A, Re\_E, Si\_A, and Se\_E at the M06-2X/6-31G(d) level of theory. Bond lengths are given in Å. Values enclosed in parentheses are energies relative to “Re\_A” calculated by MN15/6-31g(d)+SDM (toluene). Energy differences are given in kcal/mol.

## 10. NMR Spectra

$^1\text{H}$  NMR (600 MHz,  $\text{CDCl}_3$ ) and  $^{13}\text{C}$  NMR (151 MHz,  $\text{CDCl}_3$ ) spectra of **S2**

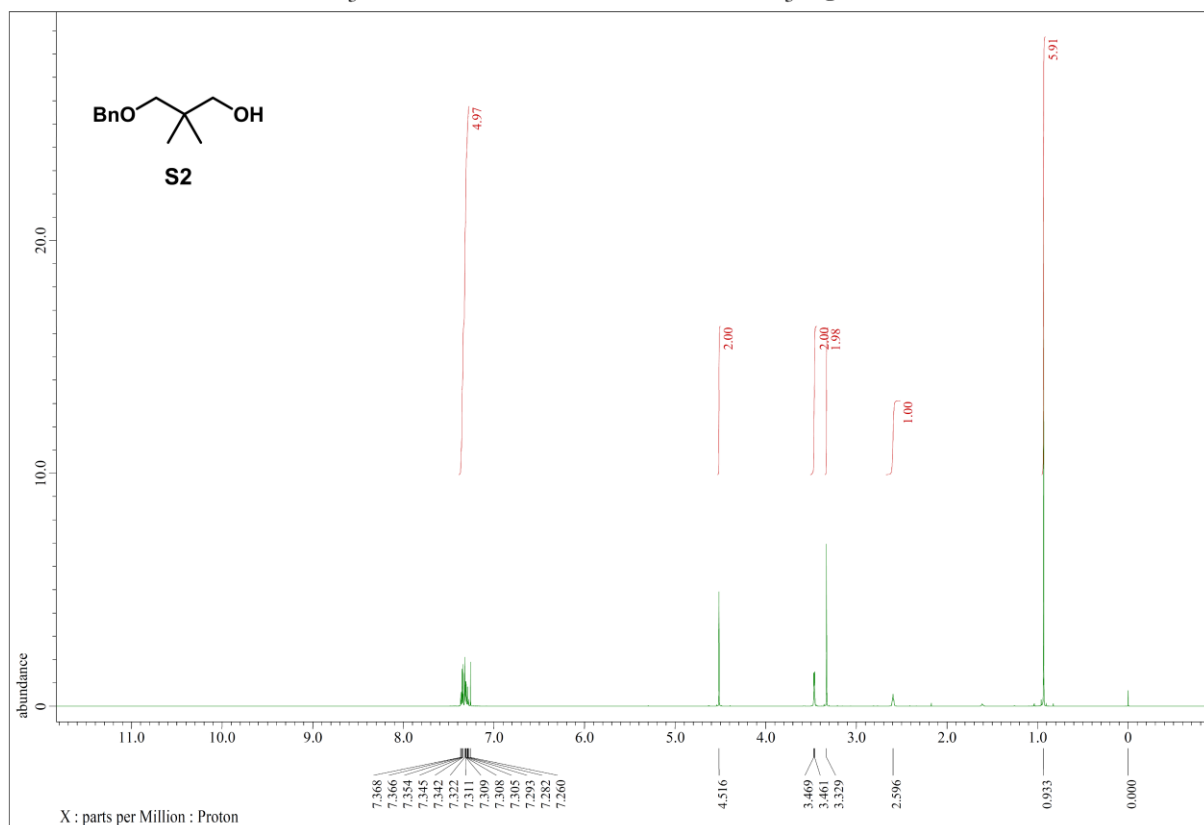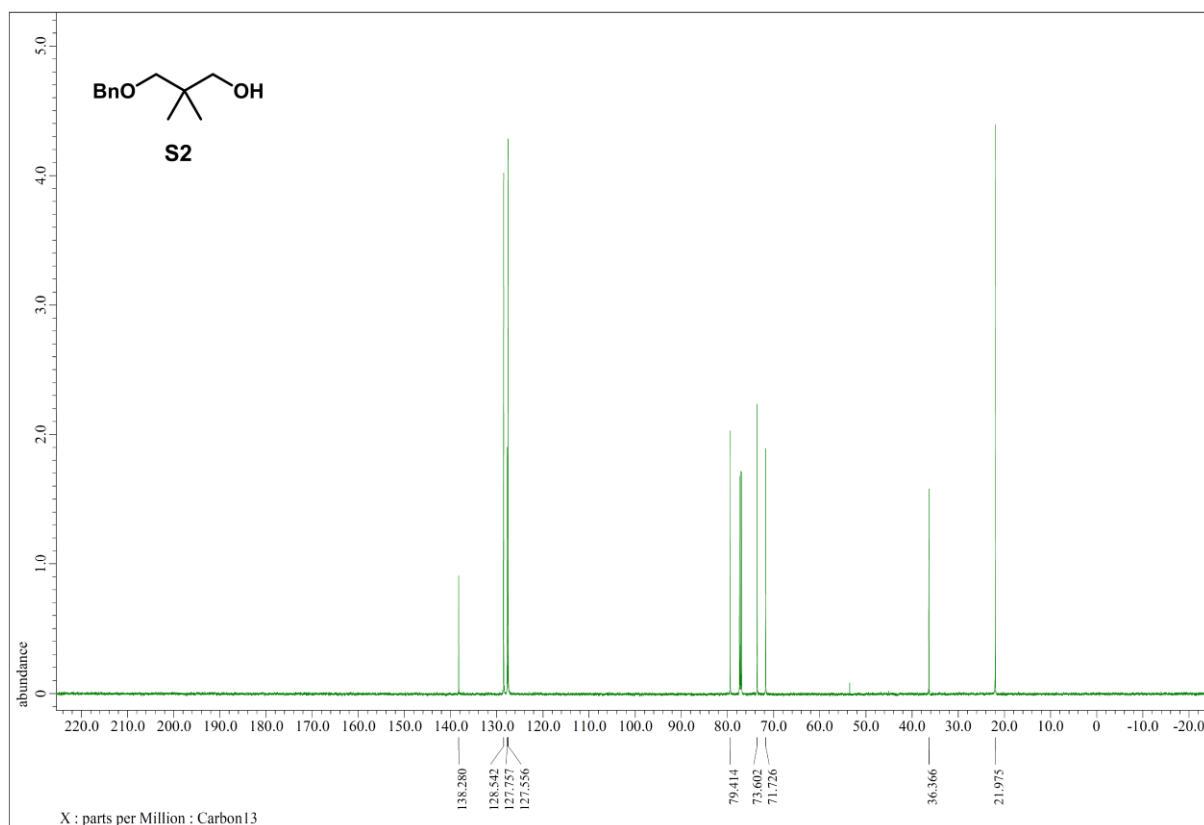

<sup>1</sup>H NMR (600 MHz, CDCl<sub>3</sub>) and <sup>13</sup>C NMR (151 MHz, CDCl<sub>3</sub>) spectra of S3

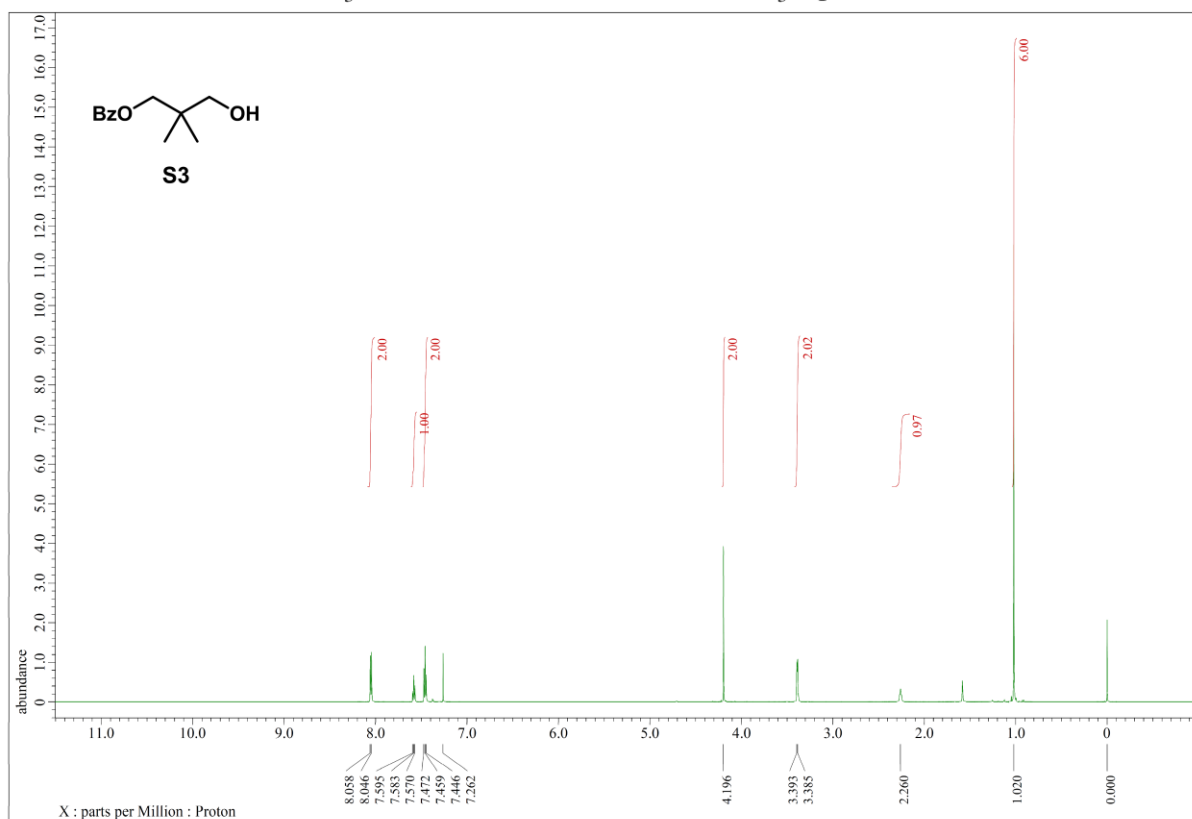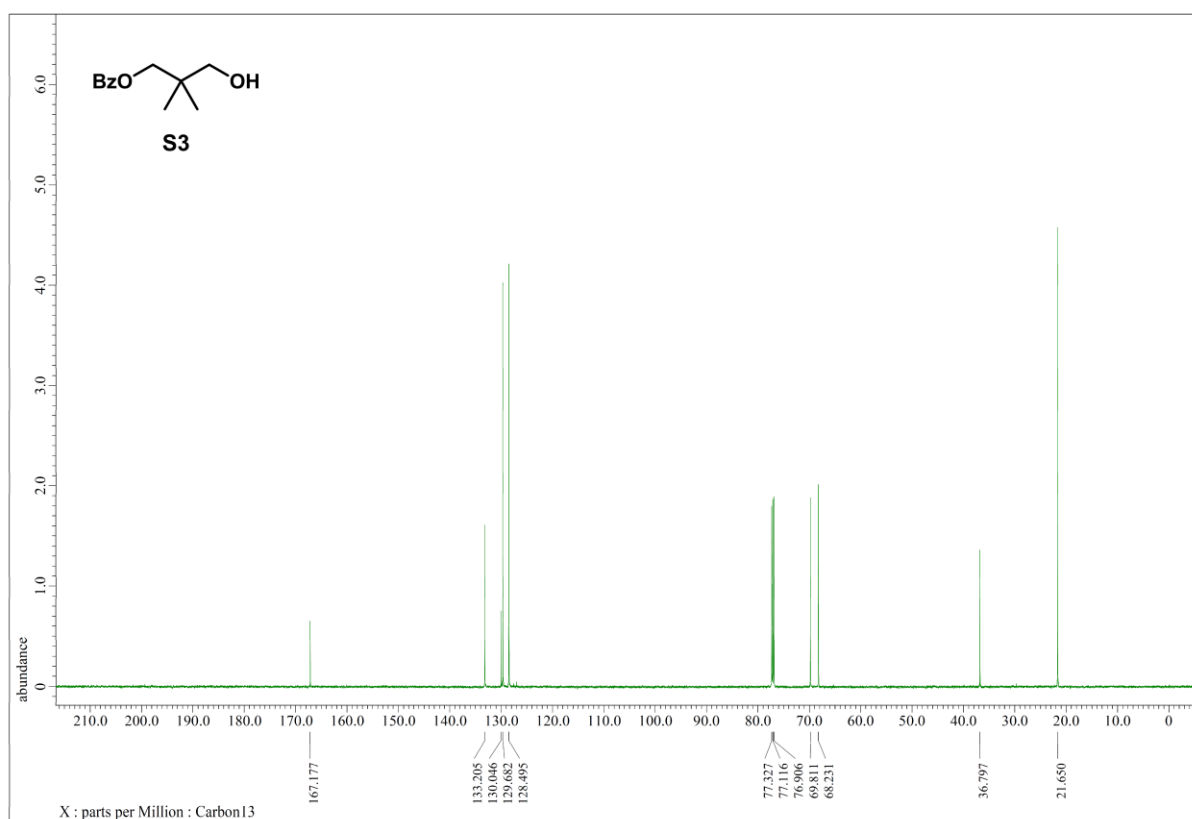

$^1\text{H}$  NMR (600 MHz,  $\text{CDCl}_3$ ) and  $^{13}\text{C}$  NMR (151 MHz,  $\text{CDCl}_3$ ) spectra of **S4**

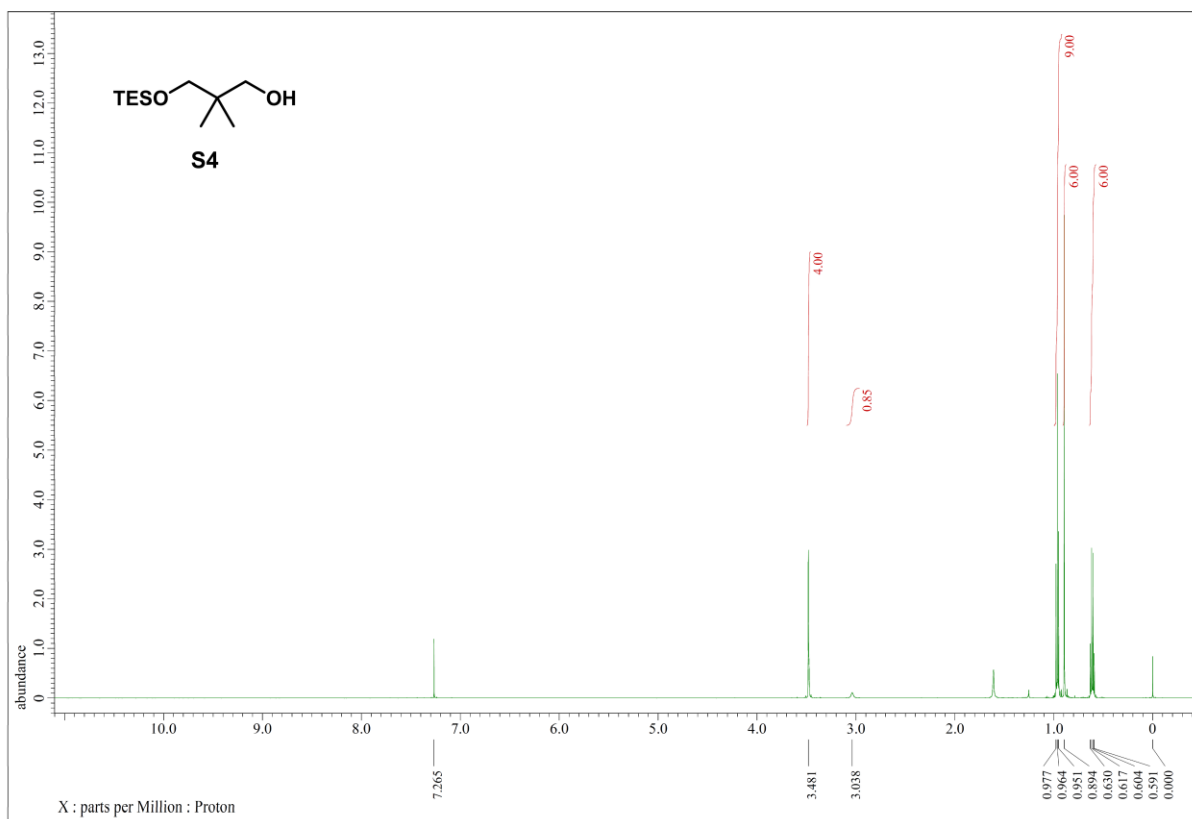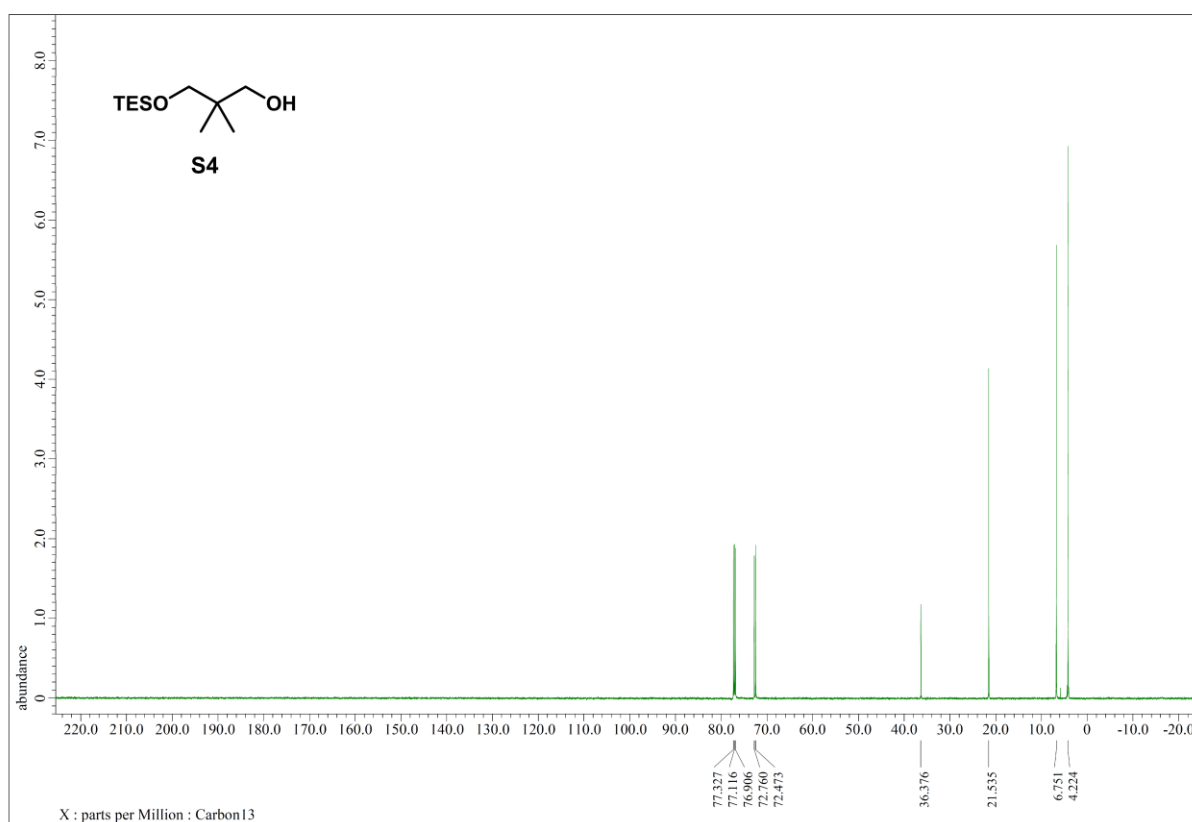

$^1\text{H}$  NMR (600 MHz,  $\text{CDCl}_3$ ) and  $^{13}\text{C}$  NMR (151 MHz,  $\text{CDCl}_3$ ) spectra of **S5**

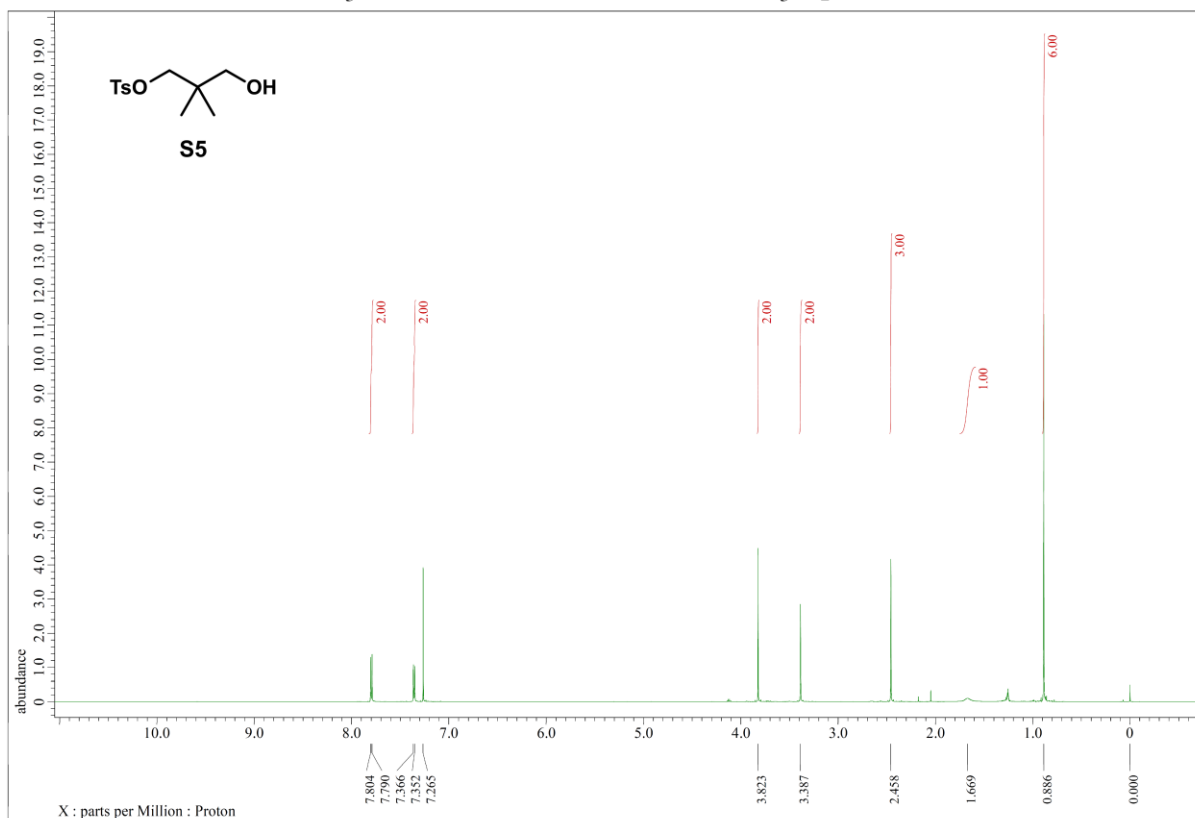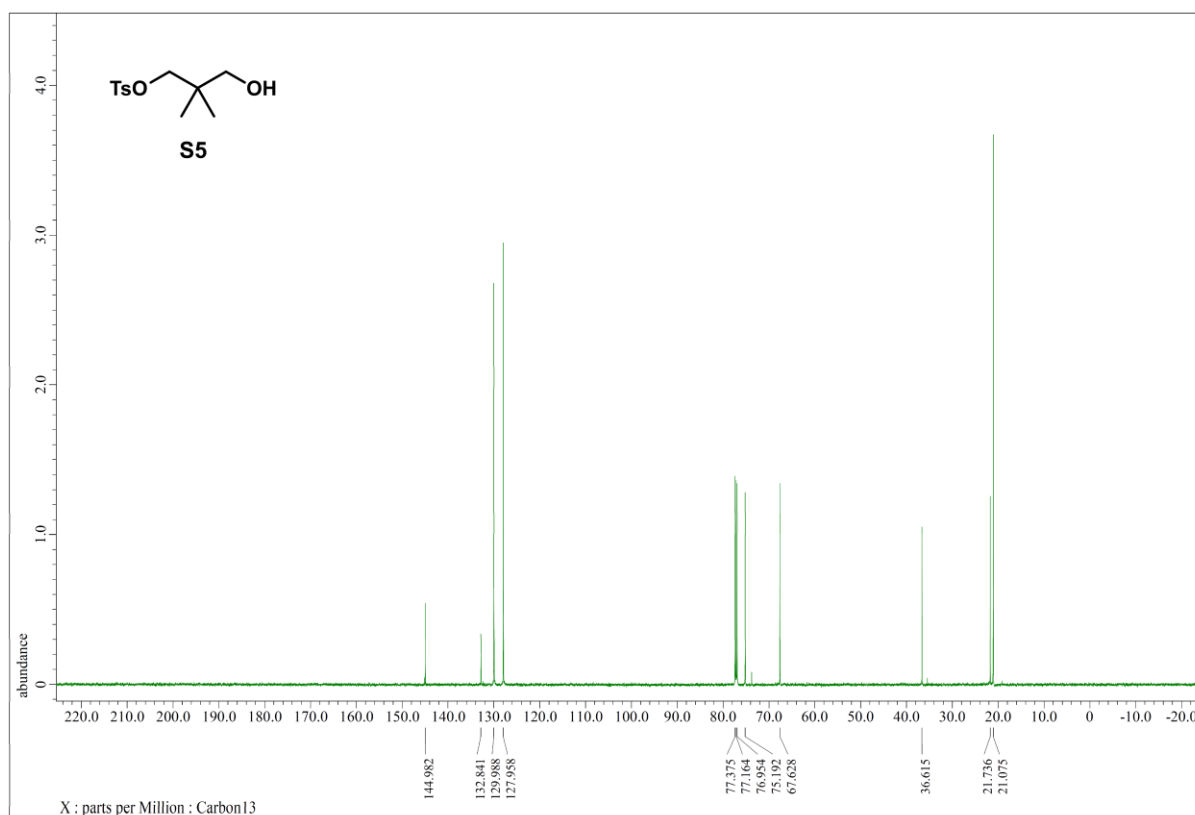

<sup>1</sup>H NMR (600 MHz, CDCl<sub>3</sub>) and <sup>13</sup>C NMR (151 MHz, CDCl<sub>3</sub>) spectra of **S6**

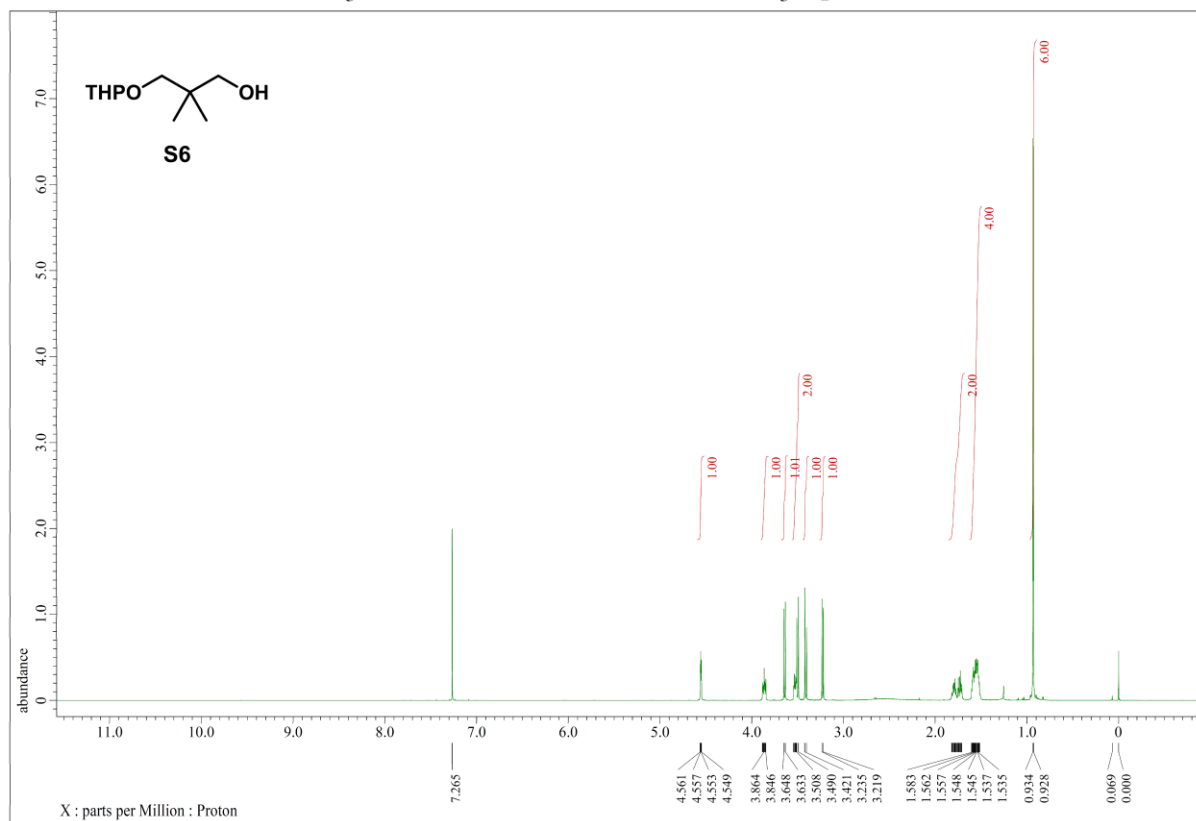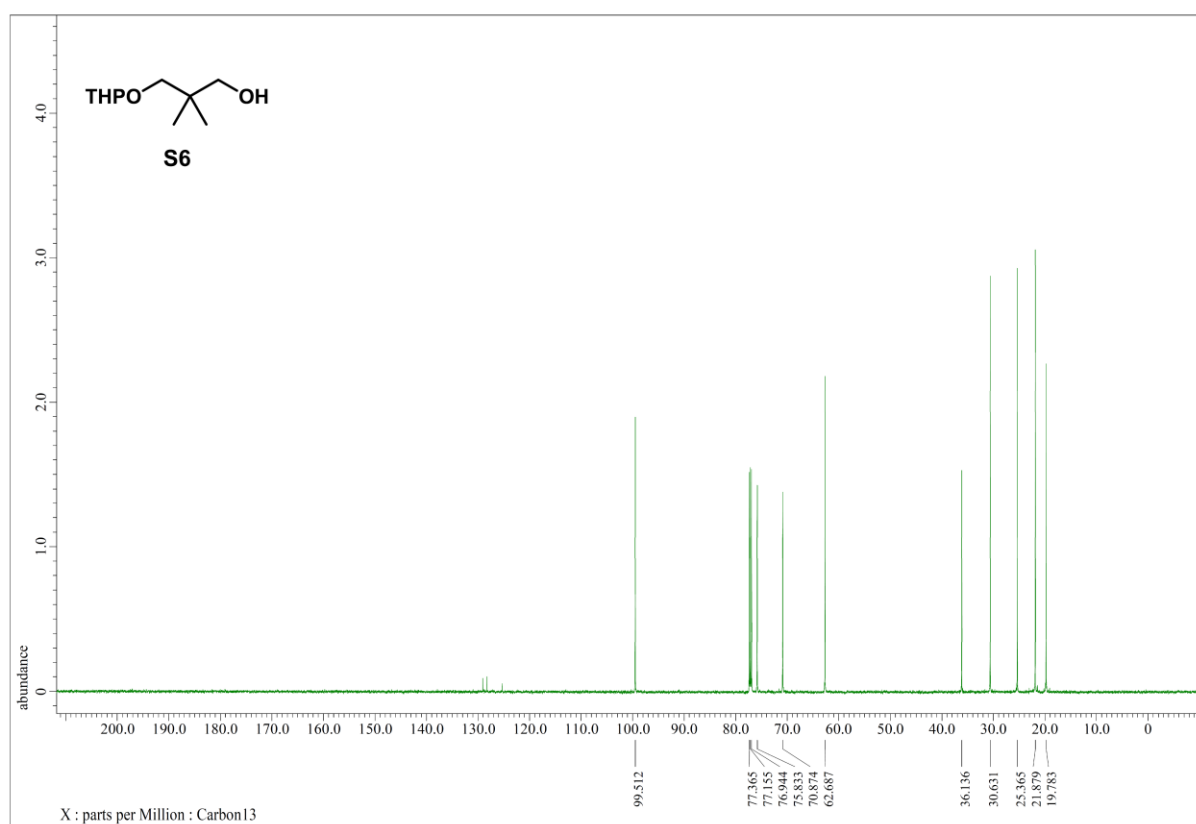

$^1\text{H}$  NMR (600 MHz,  $\text{CDCl}_3$ ) and  $^{13}\text{C}$  NMR (151 MHz,  $\text{CDCl}_3$ ) spectra of **S7**

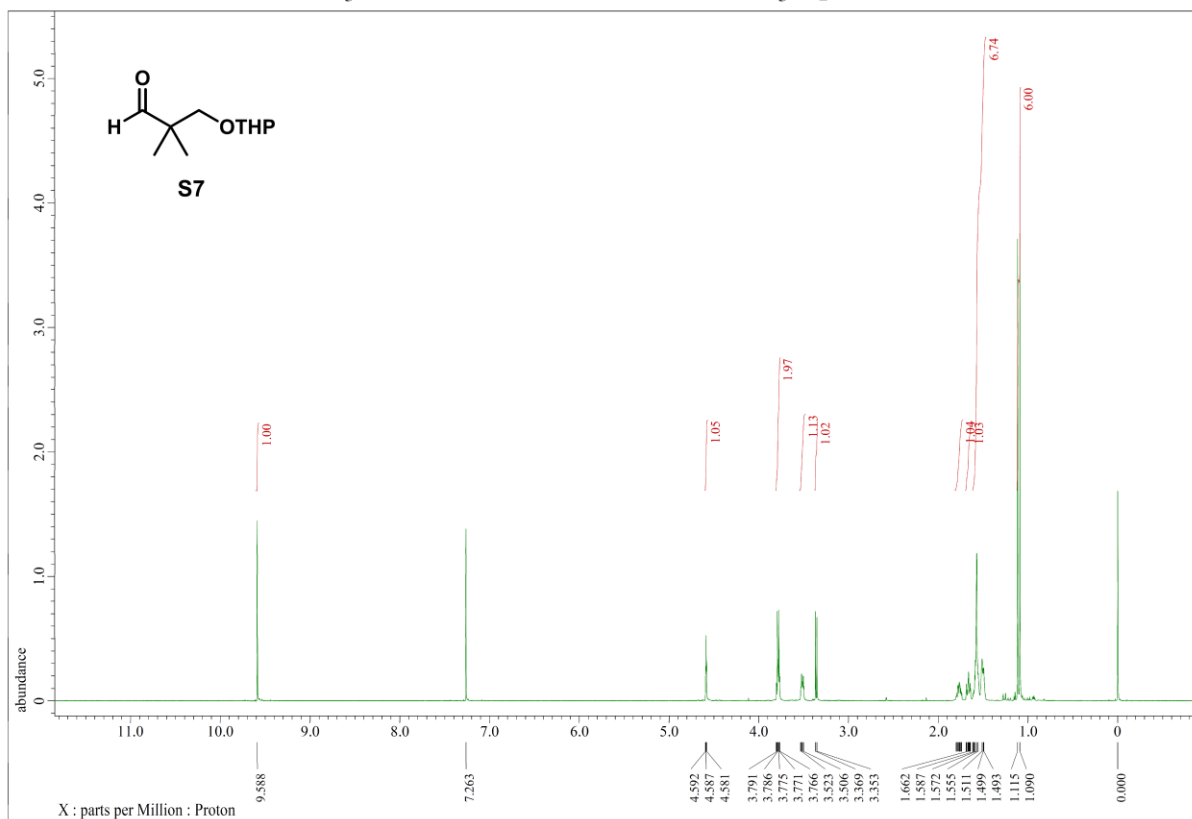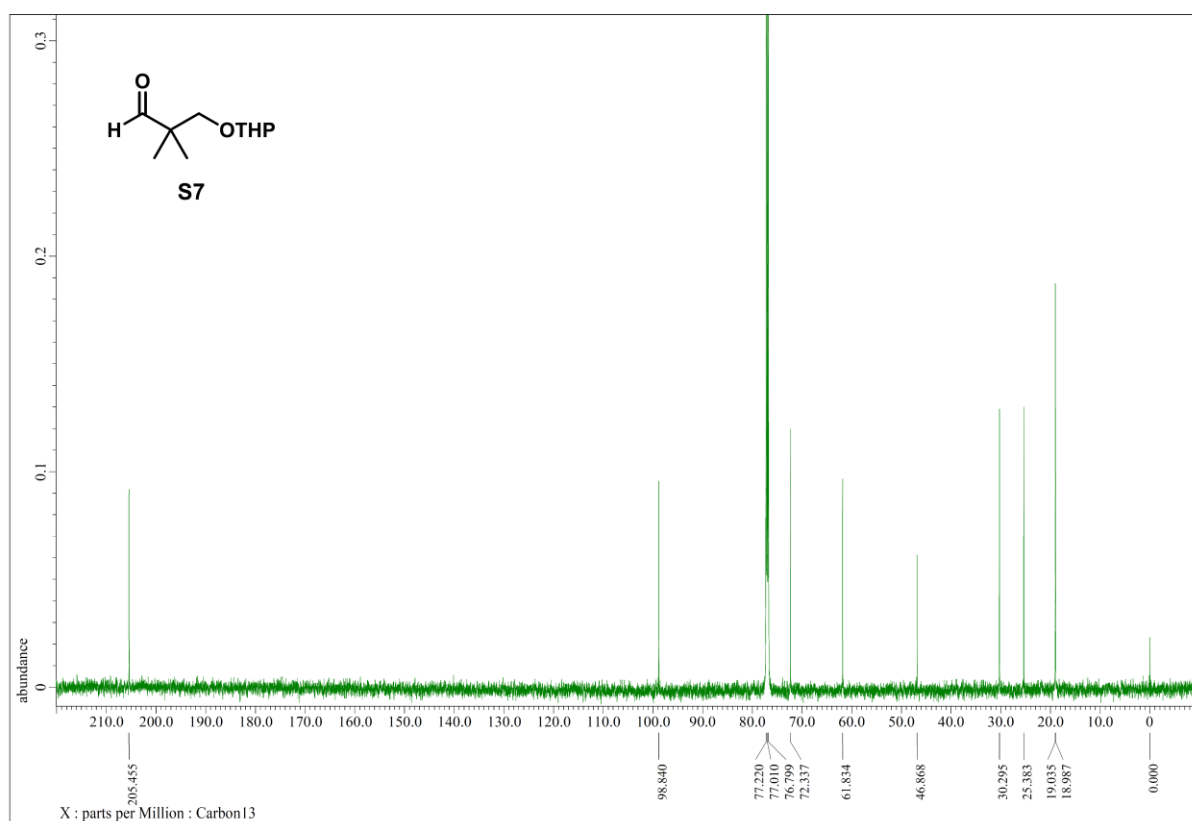



$^1\text{H}$  NMR (600 MHz,  $\text{CDCl}_3$ ) and  $^{13}\text{C}$  NMR (151 MHz,  $\text{CDCl}_3$ ) spectra of **S10**

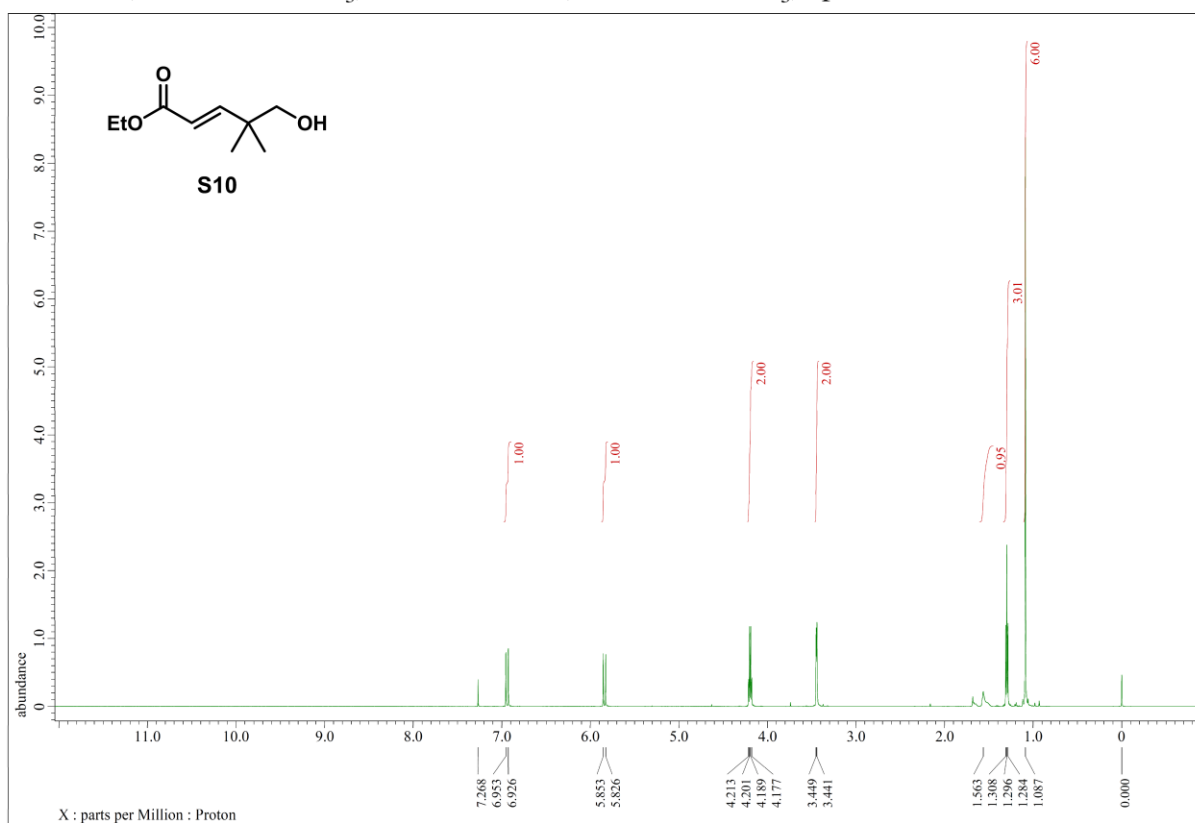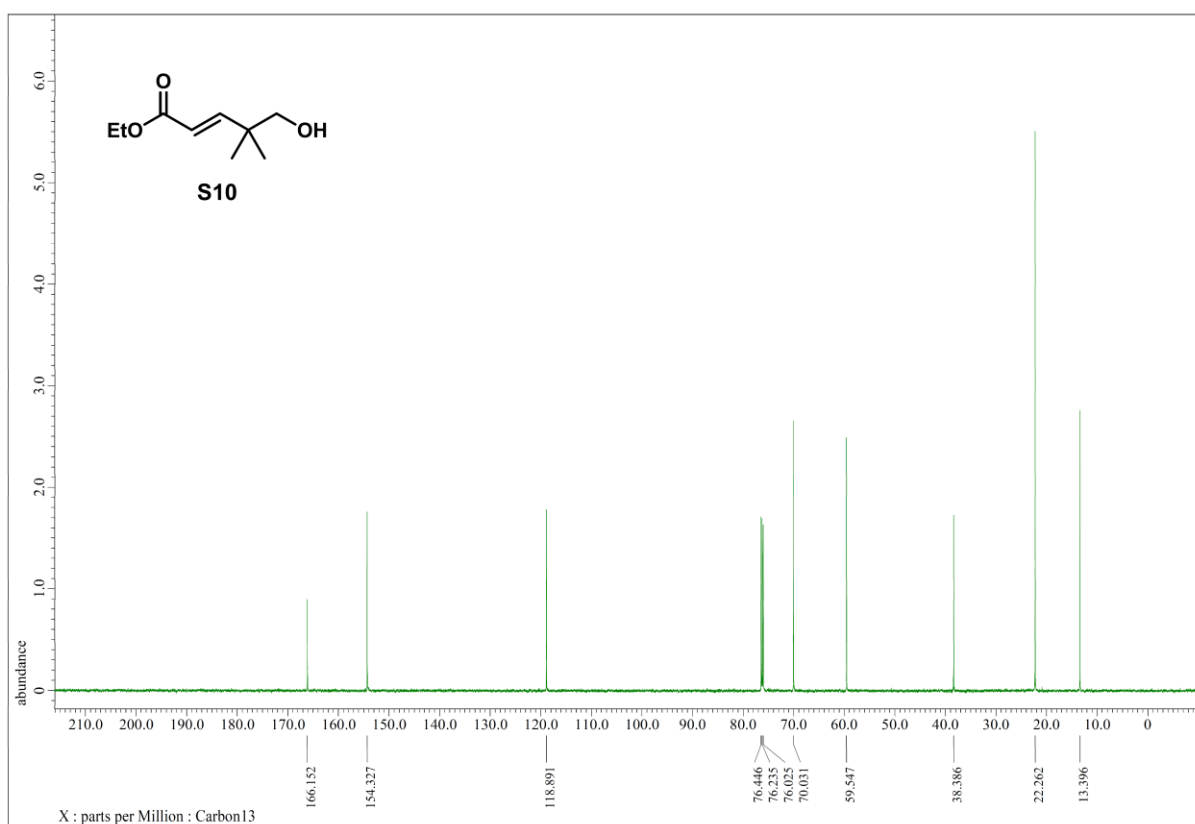

$^1\text{H}$  NMR (600 MHz,  $\text{CDCl}_3$ ) and  $^{13}\text{C}$  NMR (151 MHz,  $\text{CDCl}_3$ ) spectra of **S11**

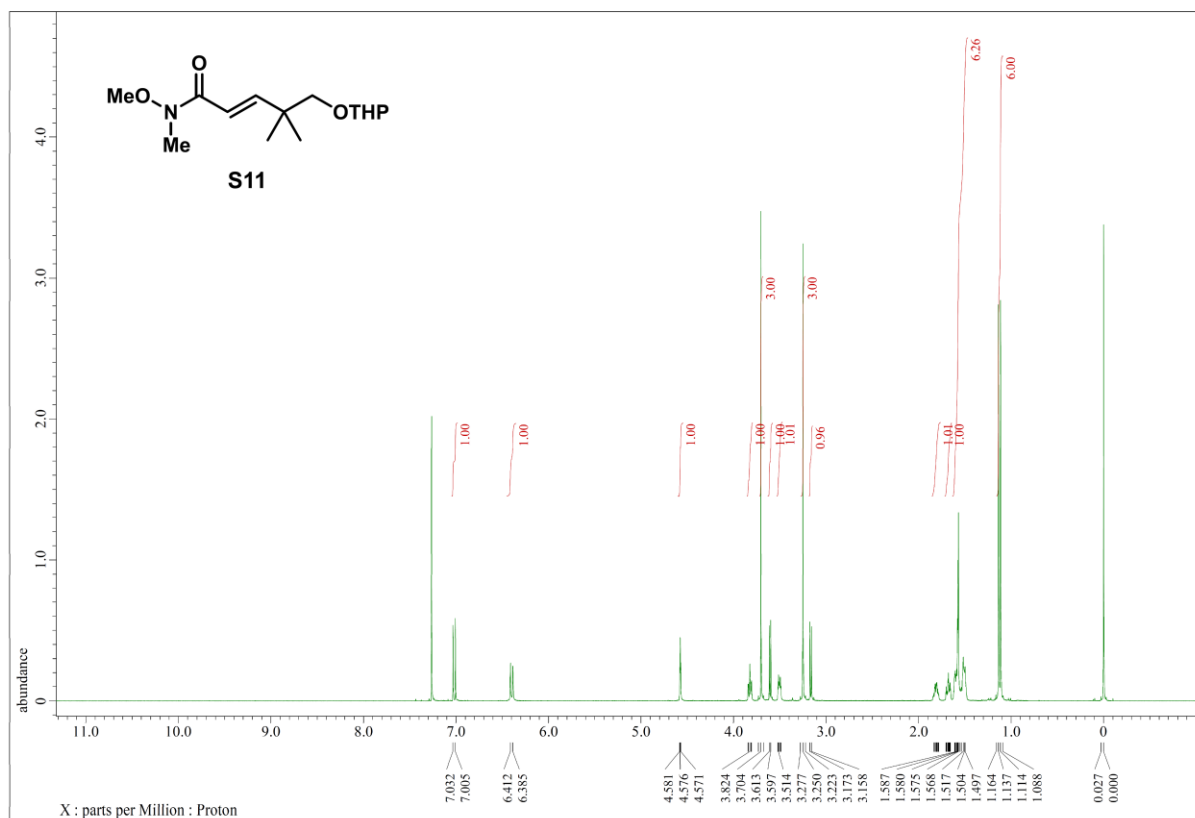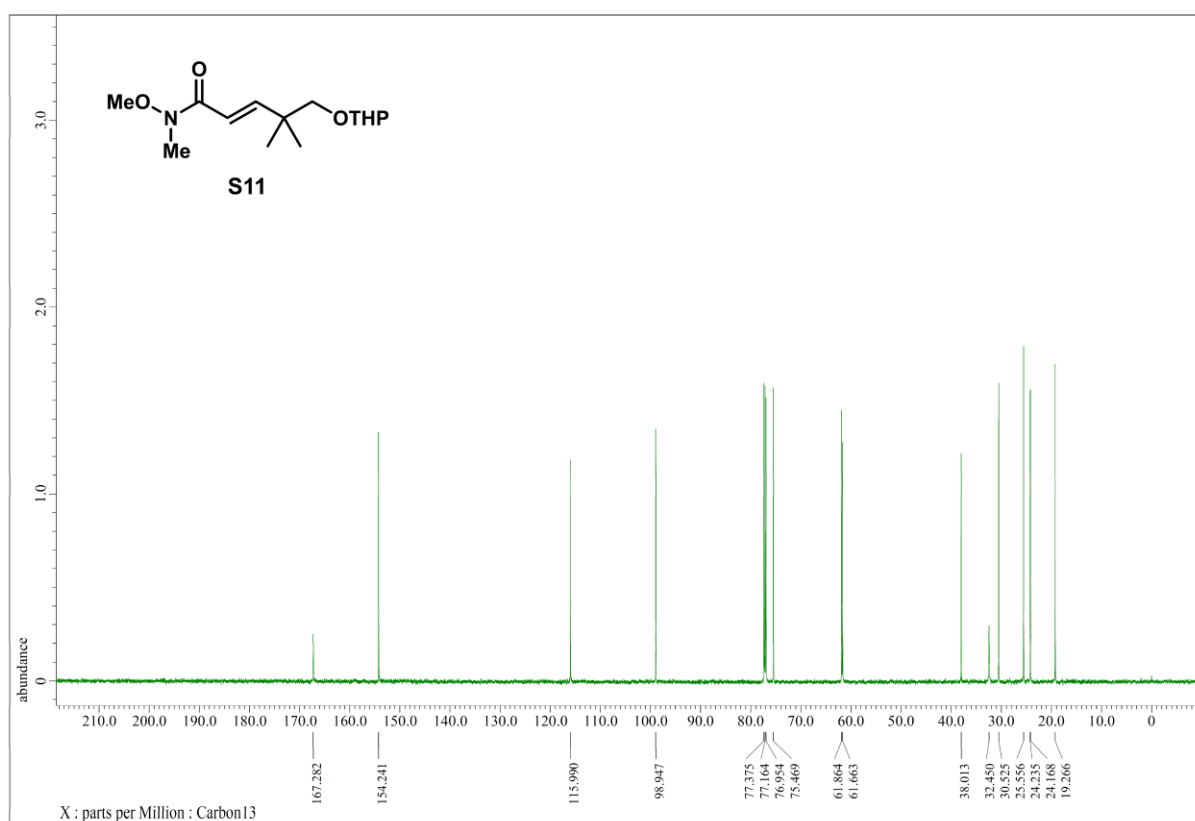

$^1\text{H}$  NMR (600 MHz,  $\text{CDCl}_3$ ) and  $^{13}\text{C}$  NMR (151 MHz,  $\text{CDCl}_3$ ) spectra of **S12**

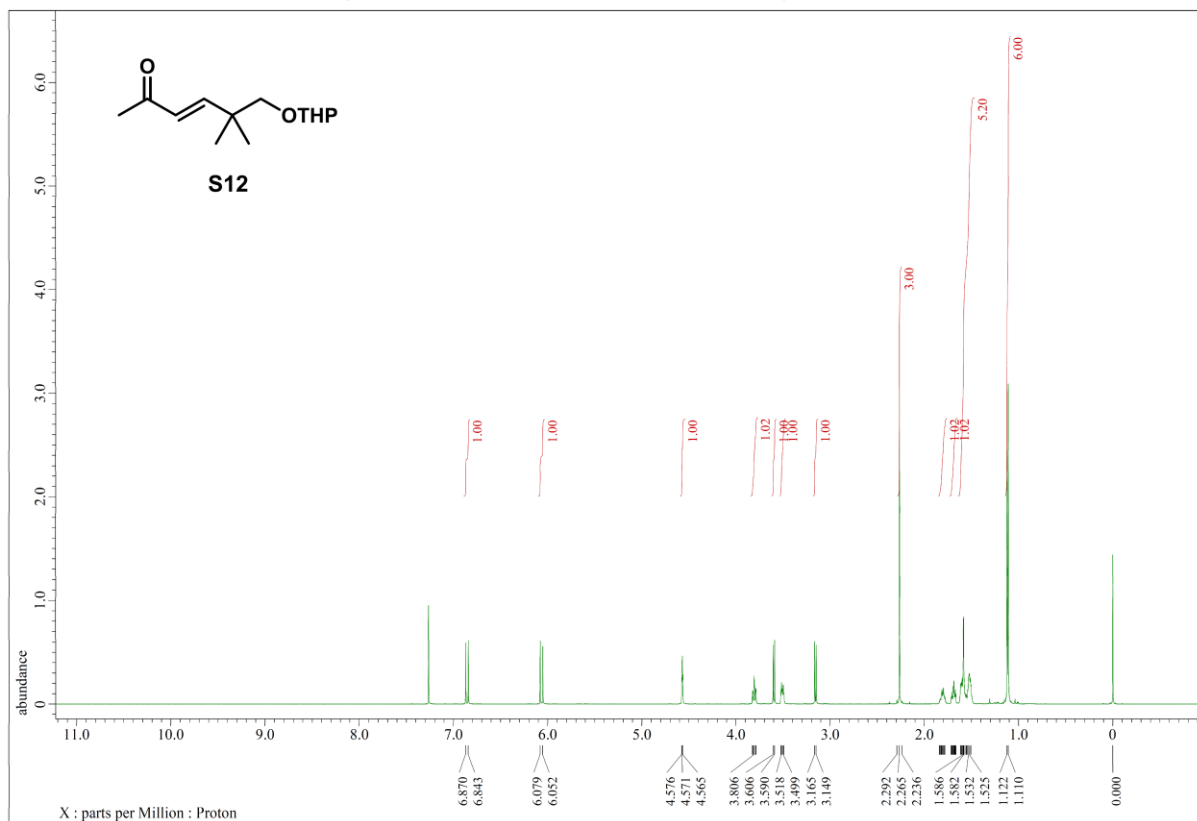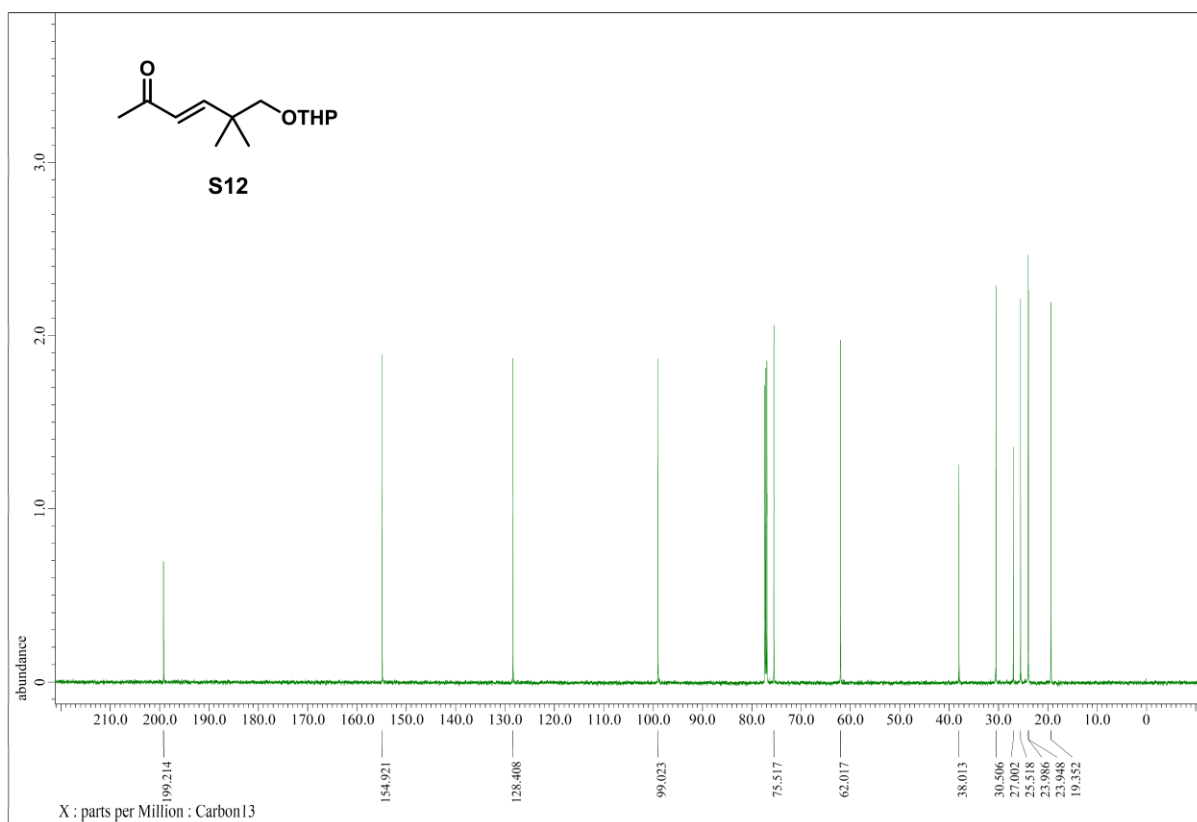

$^1\text{H}$  NMR (600 MHz,  $\text{CDCl}_3$ ) and  $^{13}\text{C}$  NMR (151 MHz,  $\text{CDCl}_3$ ) spectra of **S13**

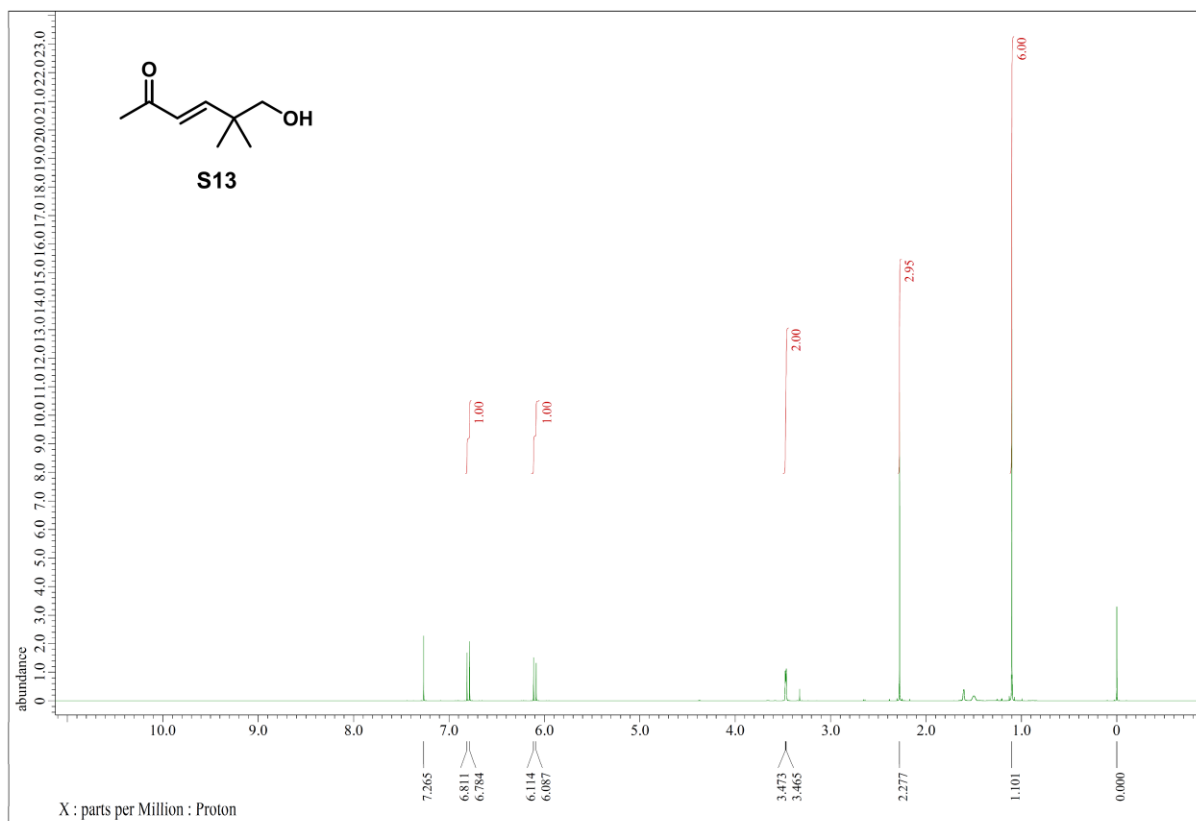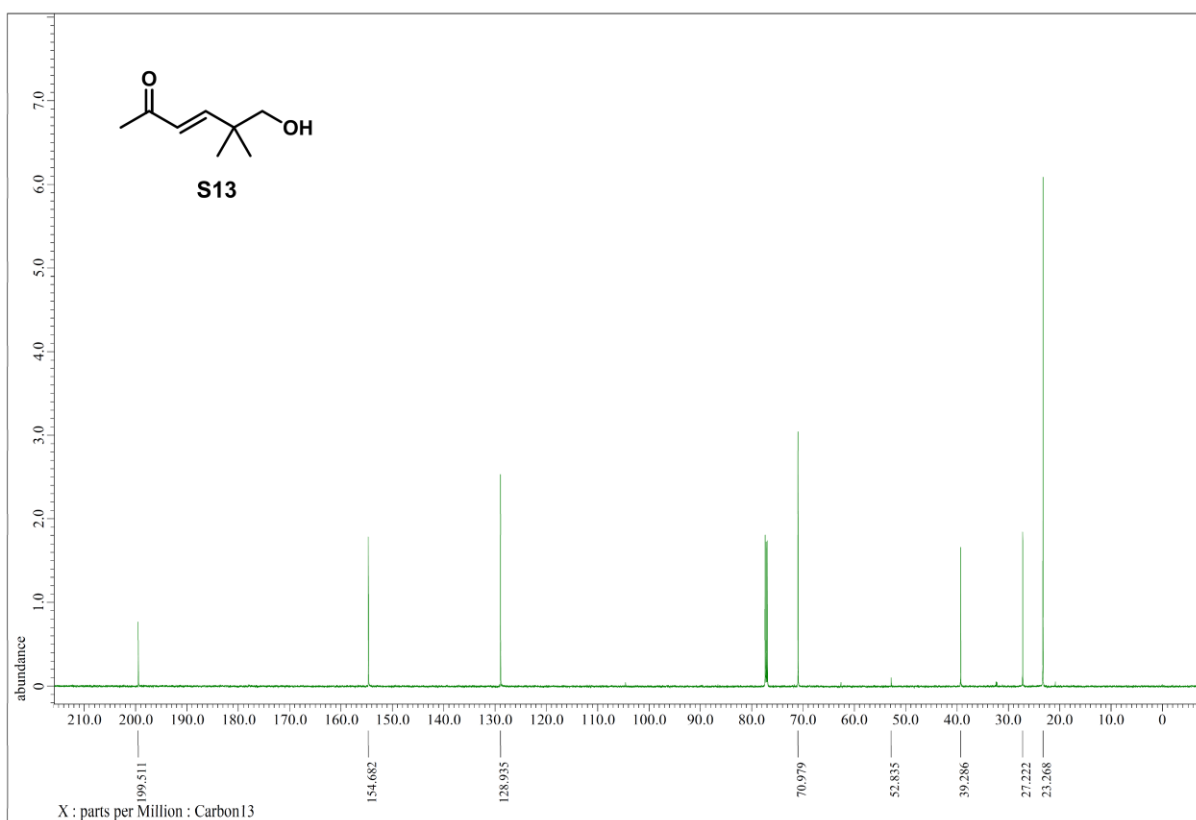

<sup>1</sup>H NMR (600 MHz, CDCl<sub>3</sub>) and <sup>13</sup>C NMR (151 MHz, CDCl<sub>3</sub>) spectra of **S15**

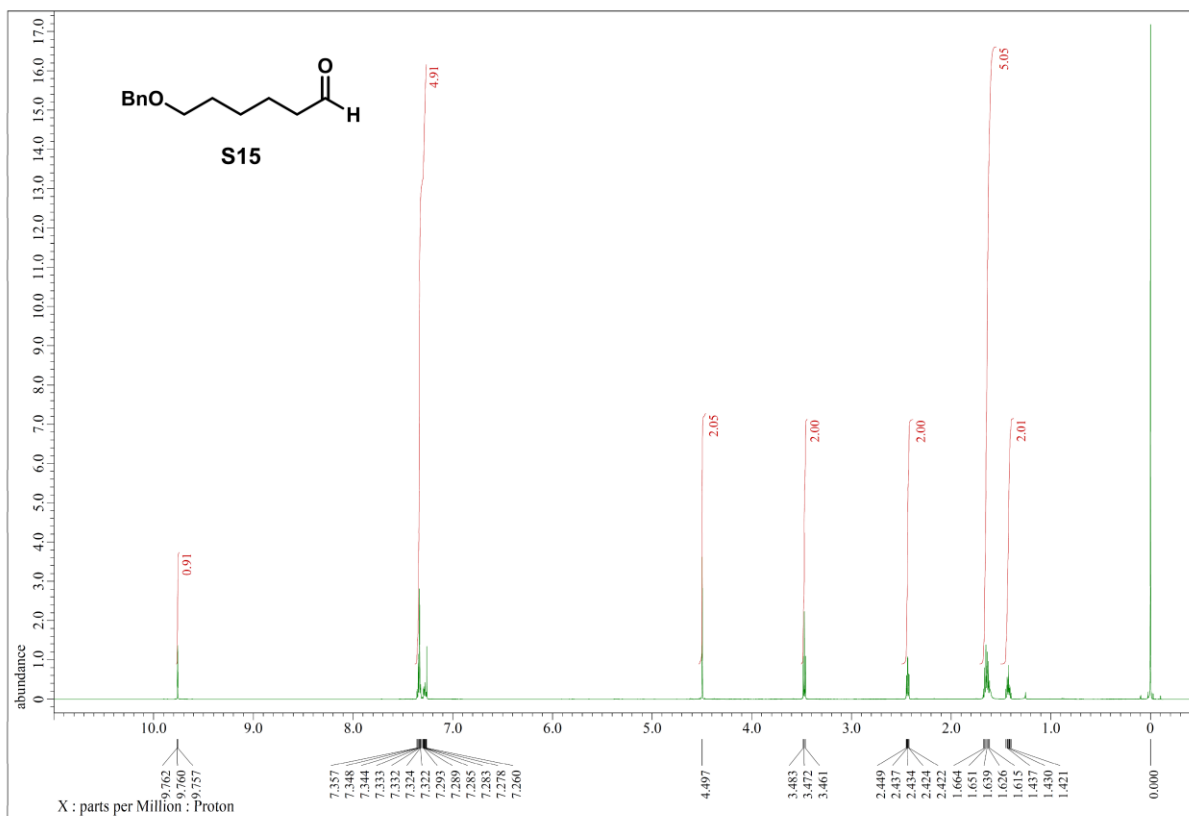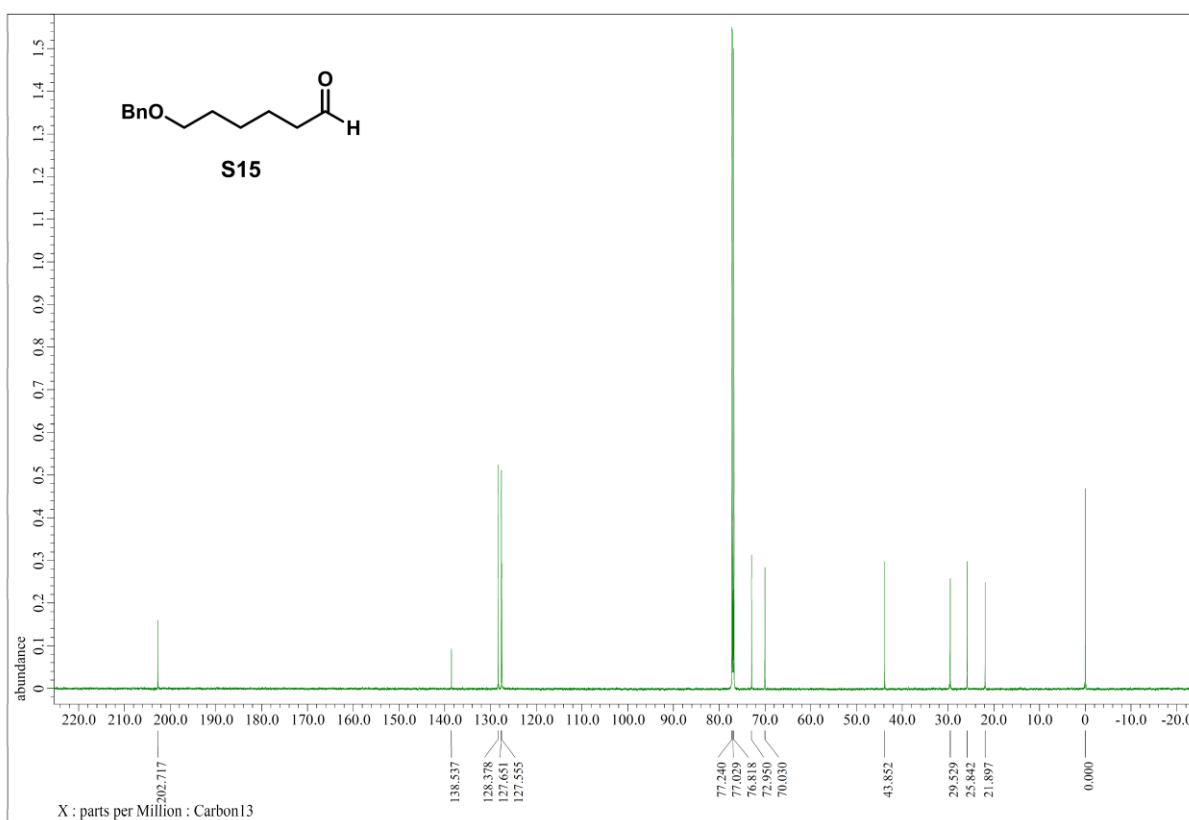

<sup>1</sup>H NMR (600 MHz, CDCl<sub>3</sub>) and <sup>13</sup>C NMR (151 MHz, CDCl<sub>3</sub>) spectra of **1b**

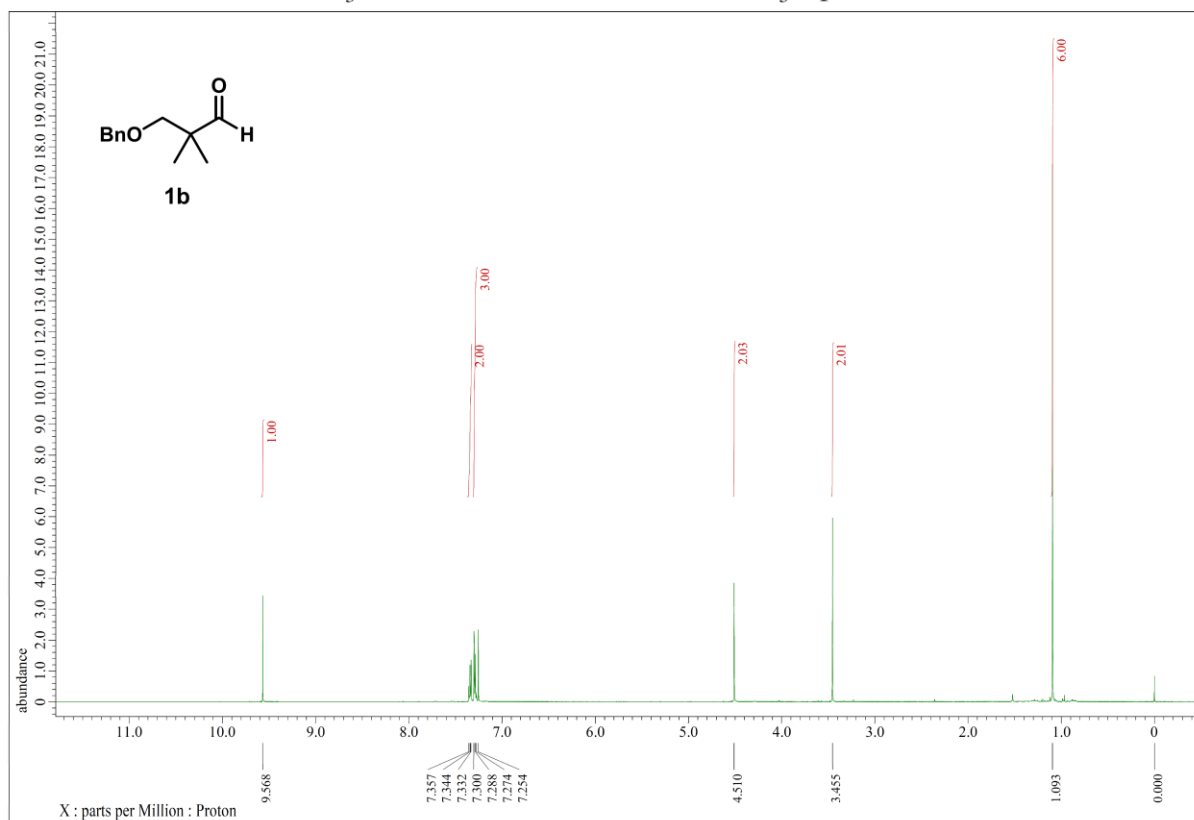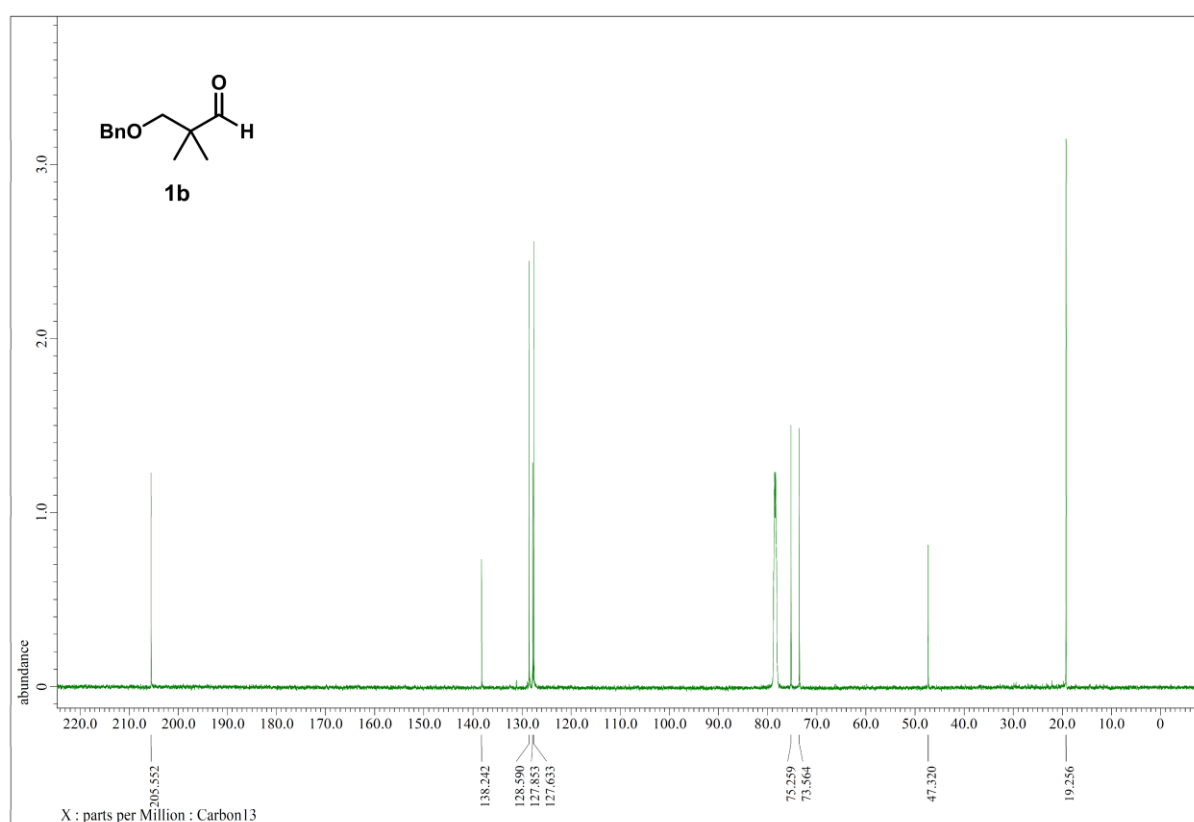

$^1\text{H}$  NMR (600 MHz,  $\text{CDCl}_3$ ) and  $^{13}\text{C}$  NMR (151 MHz,  $\text{CDCl}_3$ ) spectra of **1c**

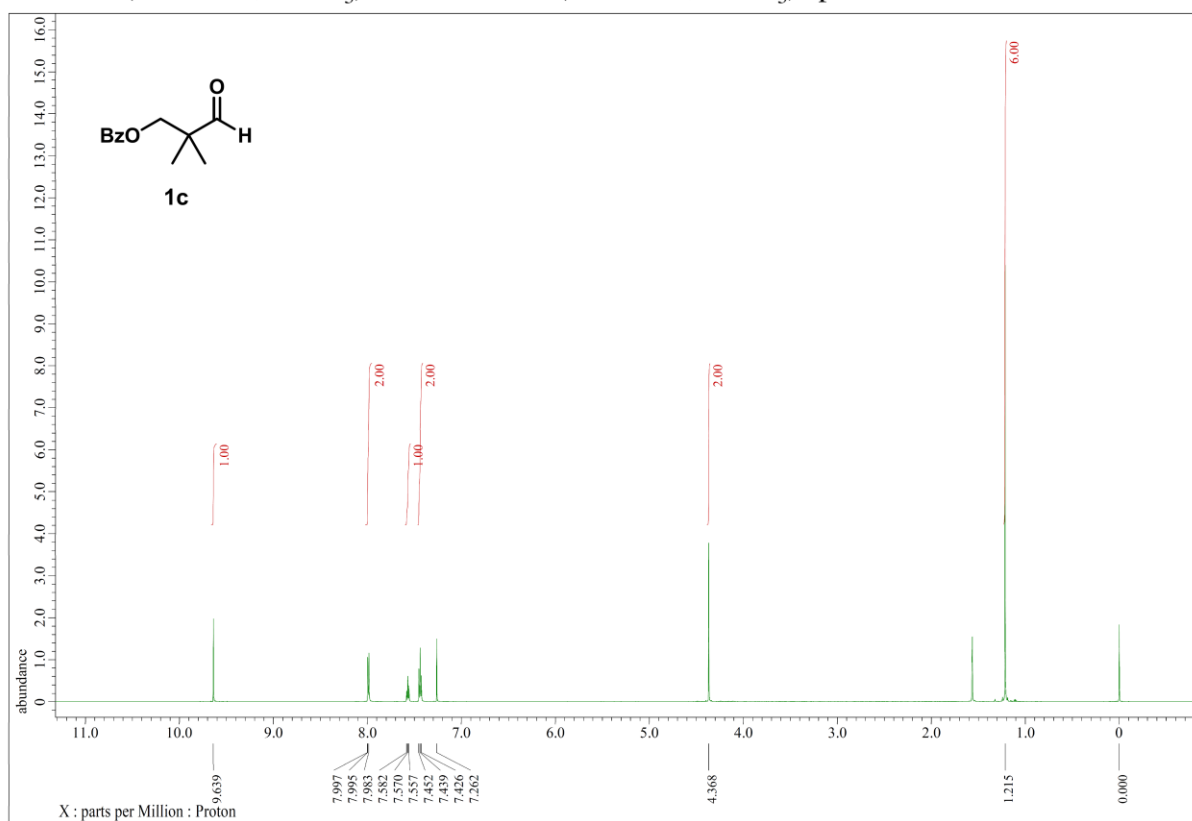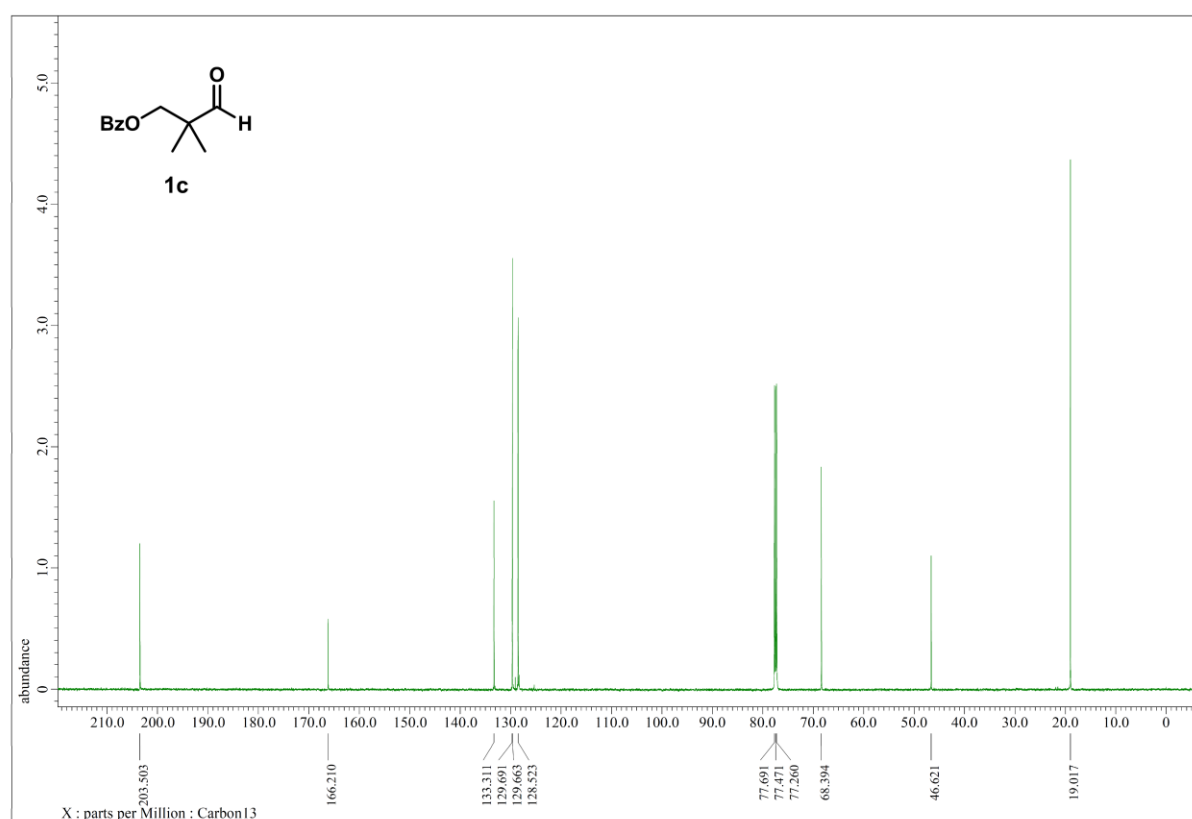

$^1\text{H}$  NMR (600 MHz,  $\text{CDCl}_3$ ) and  $^{13}\text{C}$  NMR (151 MHz,  $\text{CDCl}_3$ ) spectra of **1d**

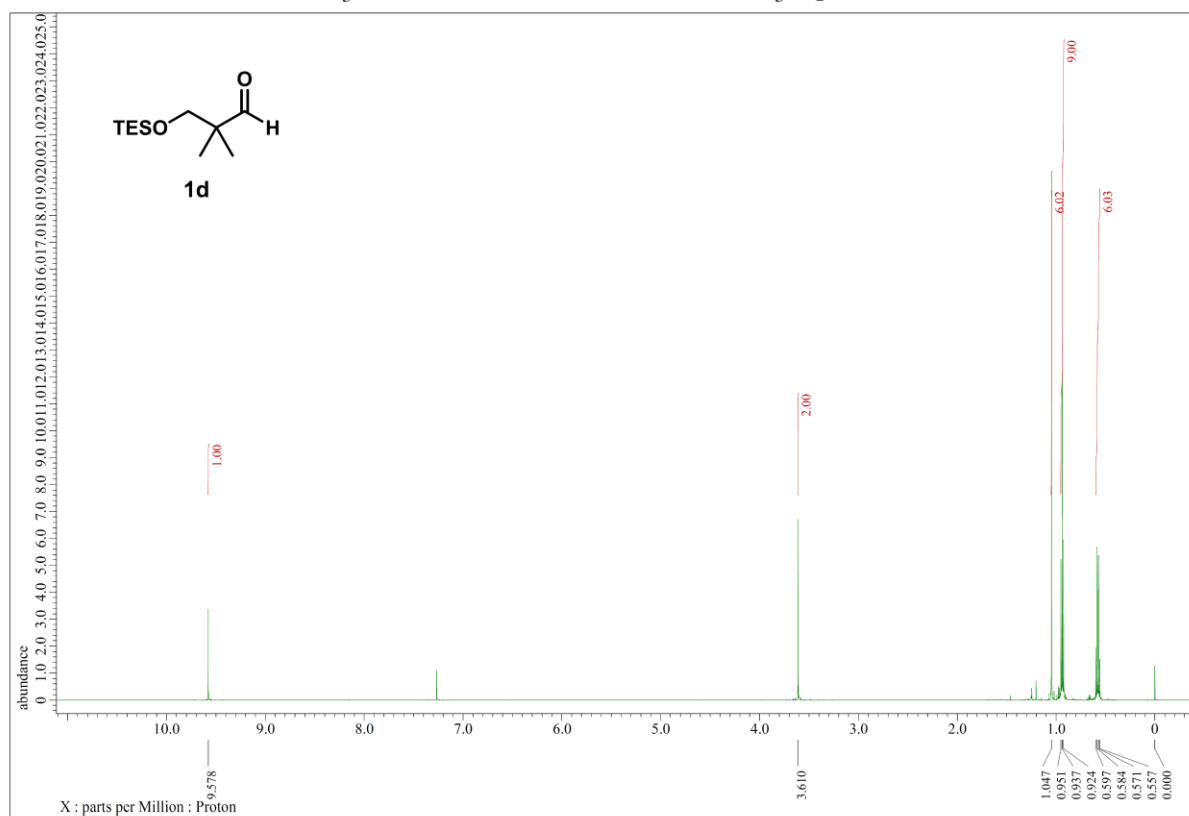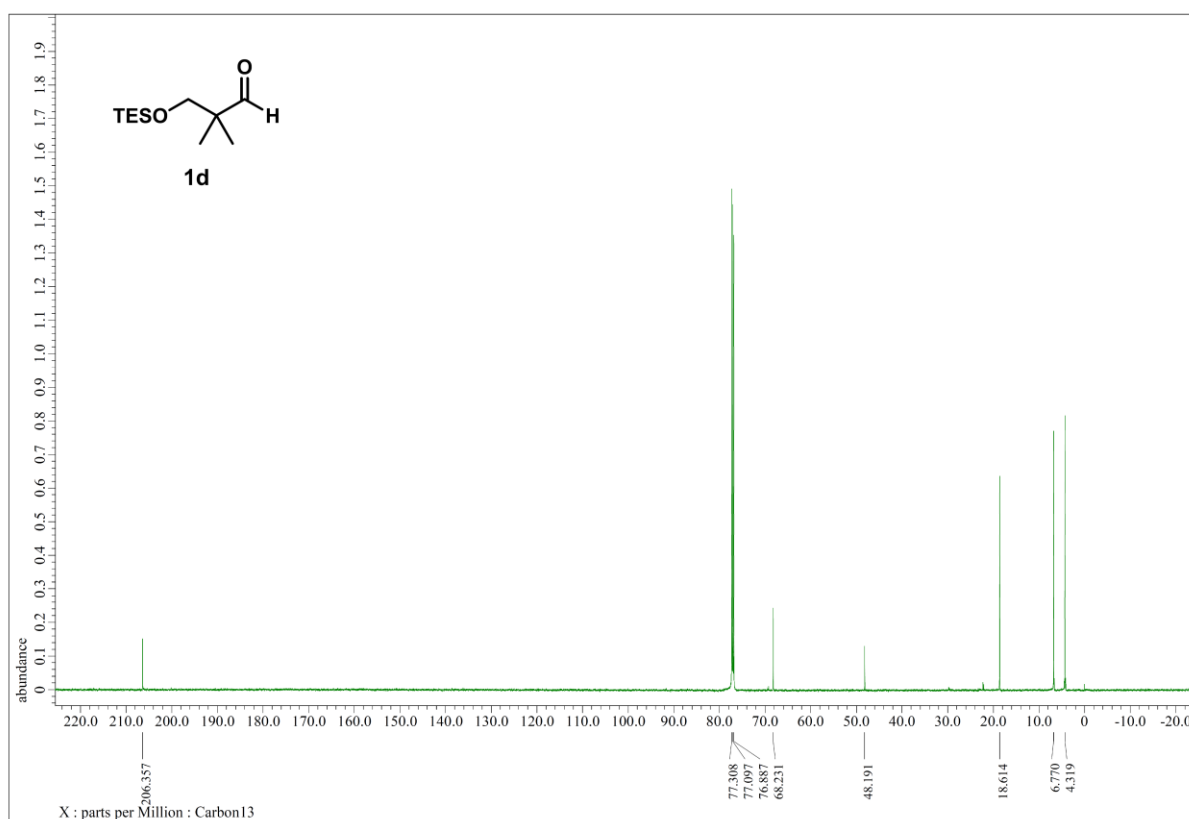



$^1\text{H}$  NMR (600 MHz,  $\text{CDCl}_3$ ) and  $^{13}\text{C}$  NMR (151 MHz,  $\text{CDCl}_3$ ) spectra of **1e**

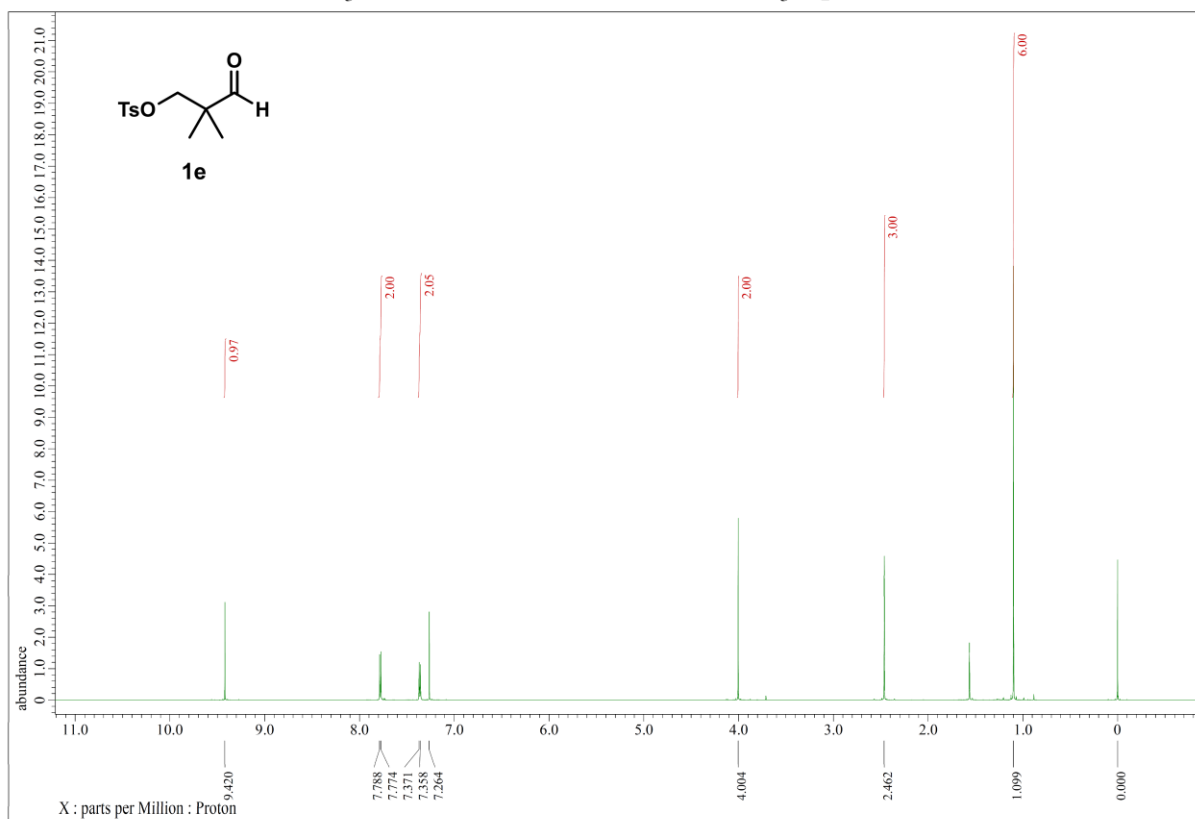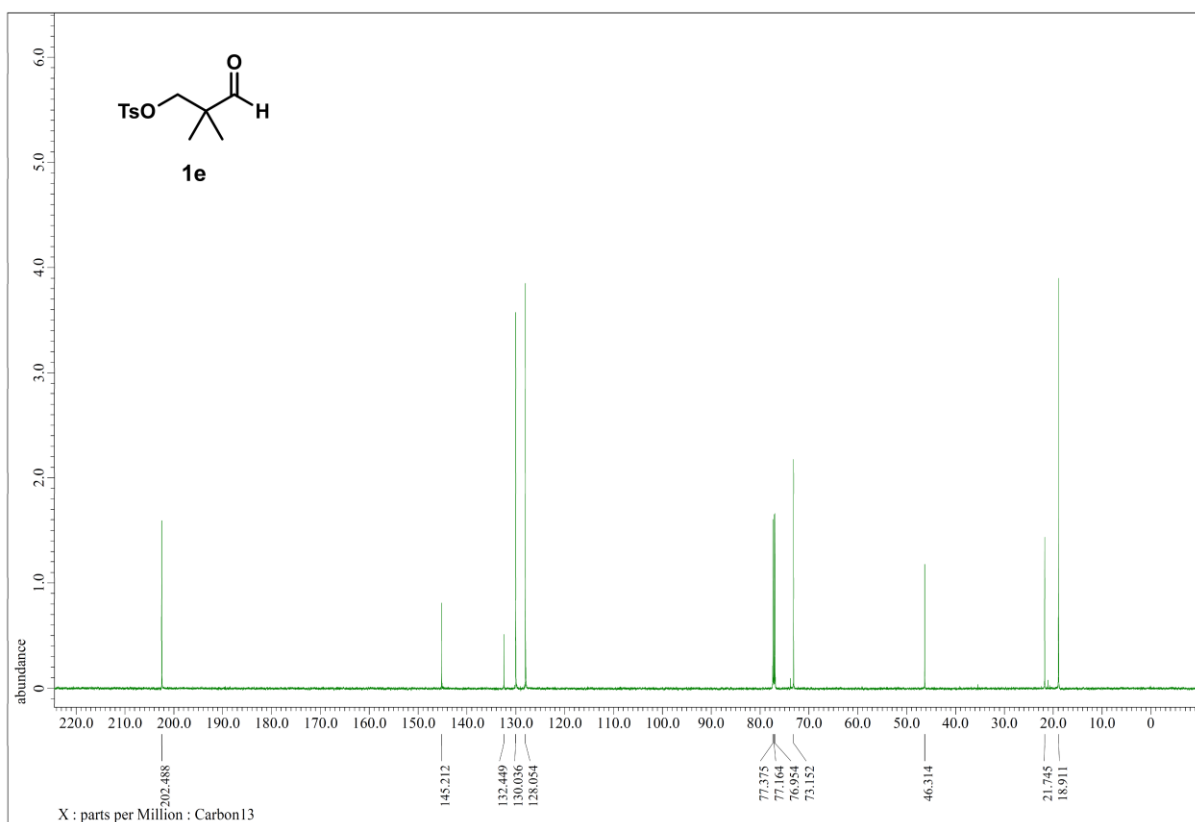

$^1\text{H}$  NMR (600 MHz,  $\text{CDCl}_3$ ) and  $^{13}\text{C}$  NMR (151 MHz,  $\text{CDCl}_3$ ) spectra of **1f**

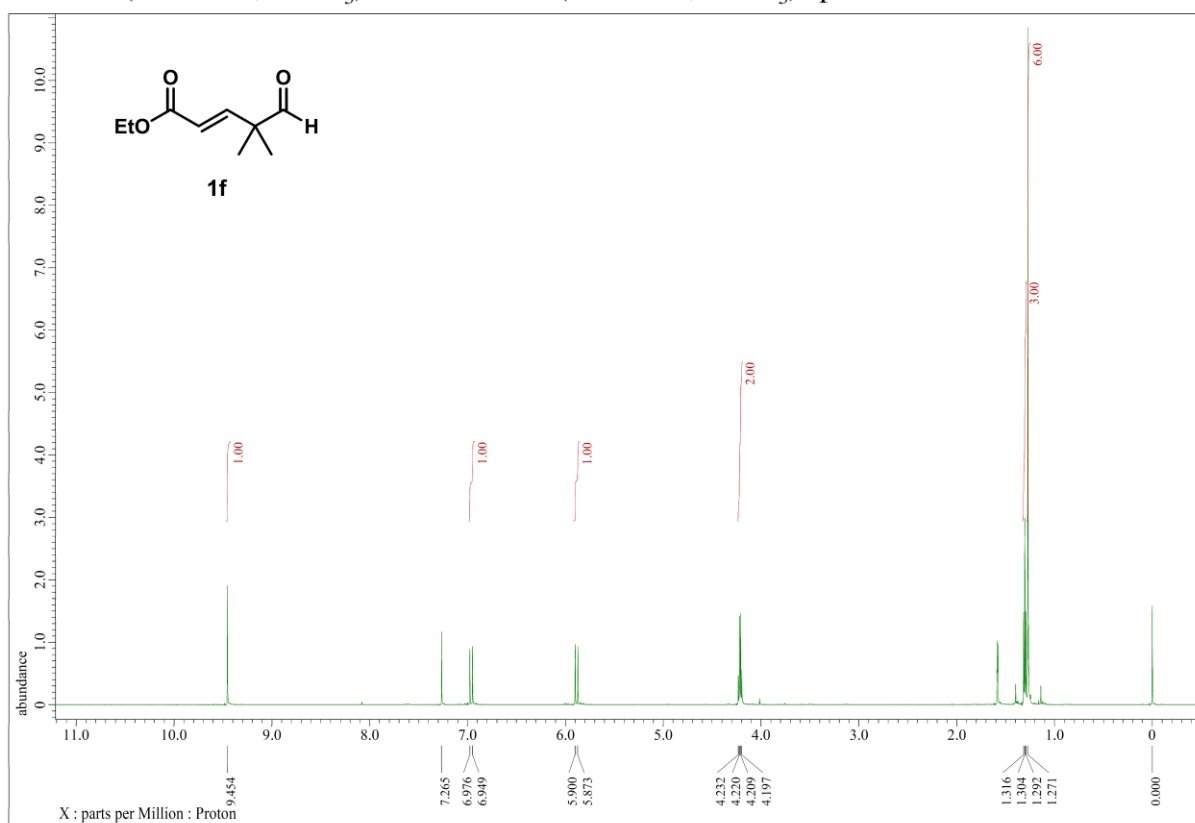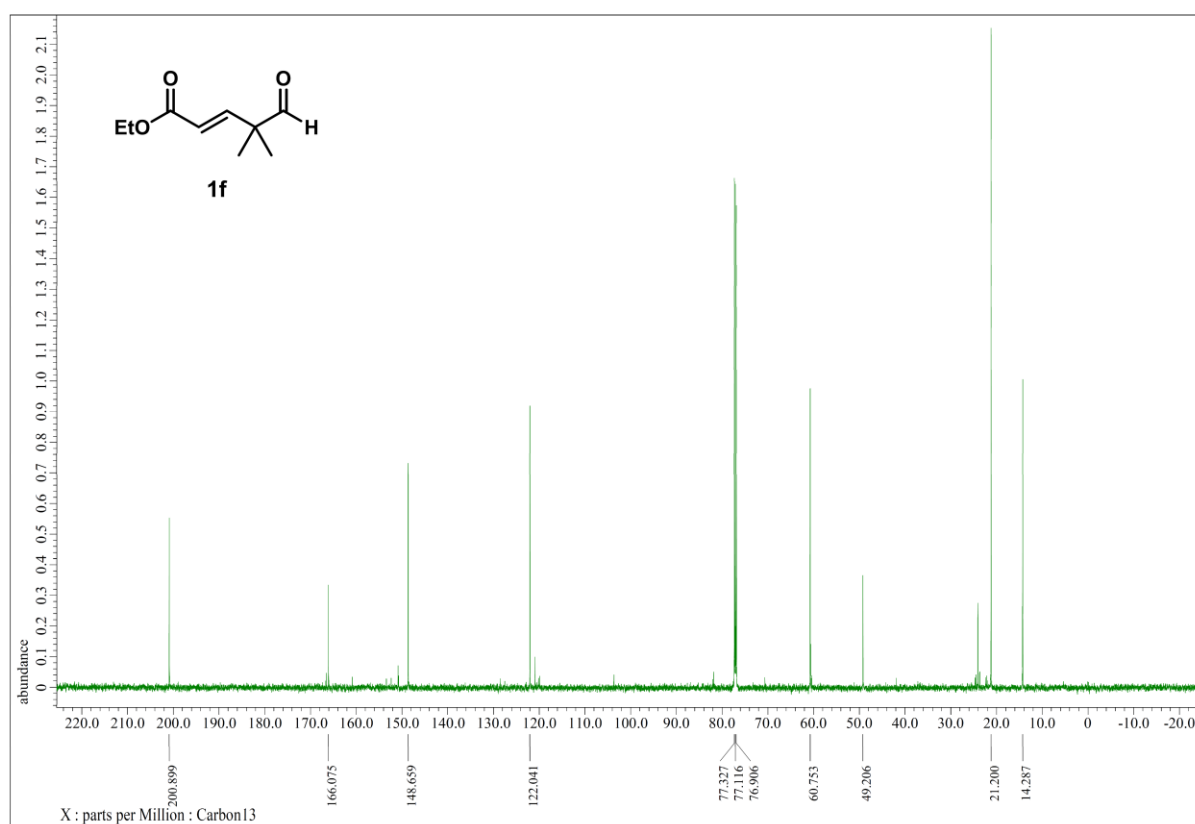

$^1\text{H}$  NMR (600 MHz,  $\text{CDCl}_3$ ) and  $^{13}\text{C}$  NMR (151 MHz,  $\text{CDCl}_3$ ) spectra of **1g**

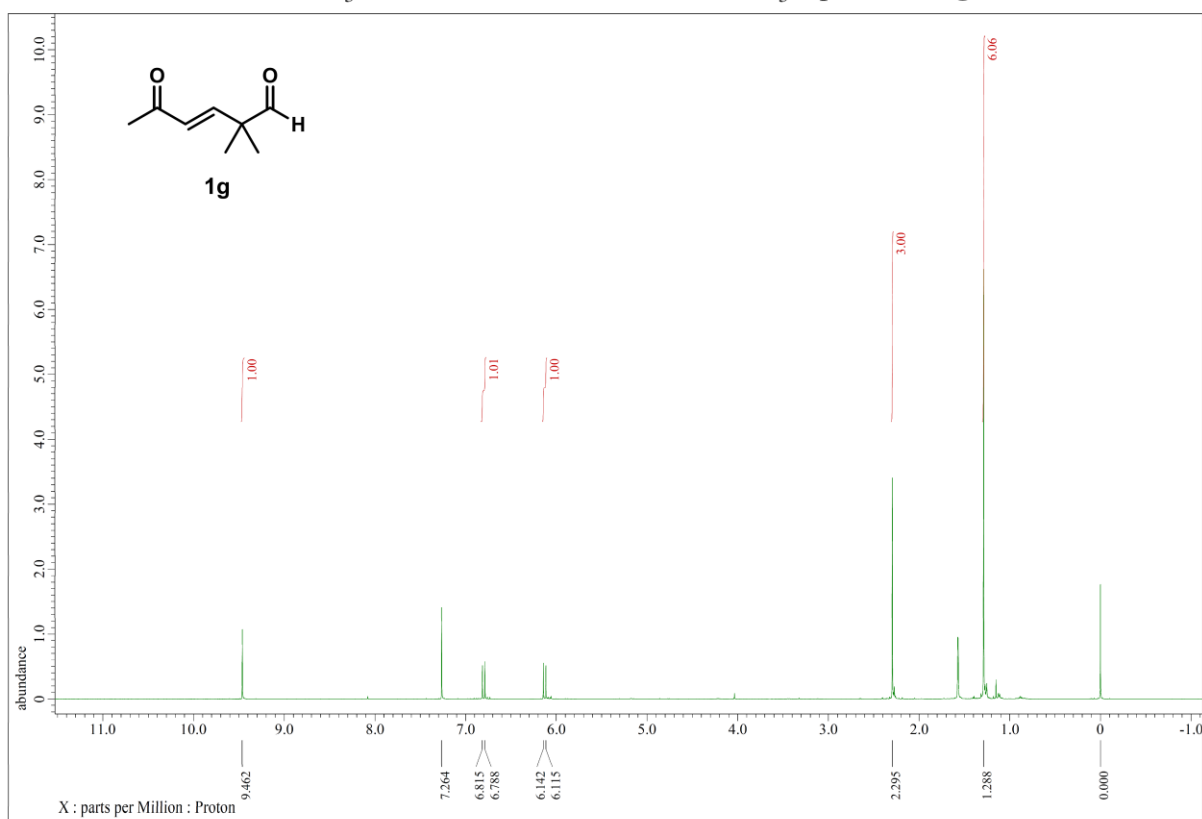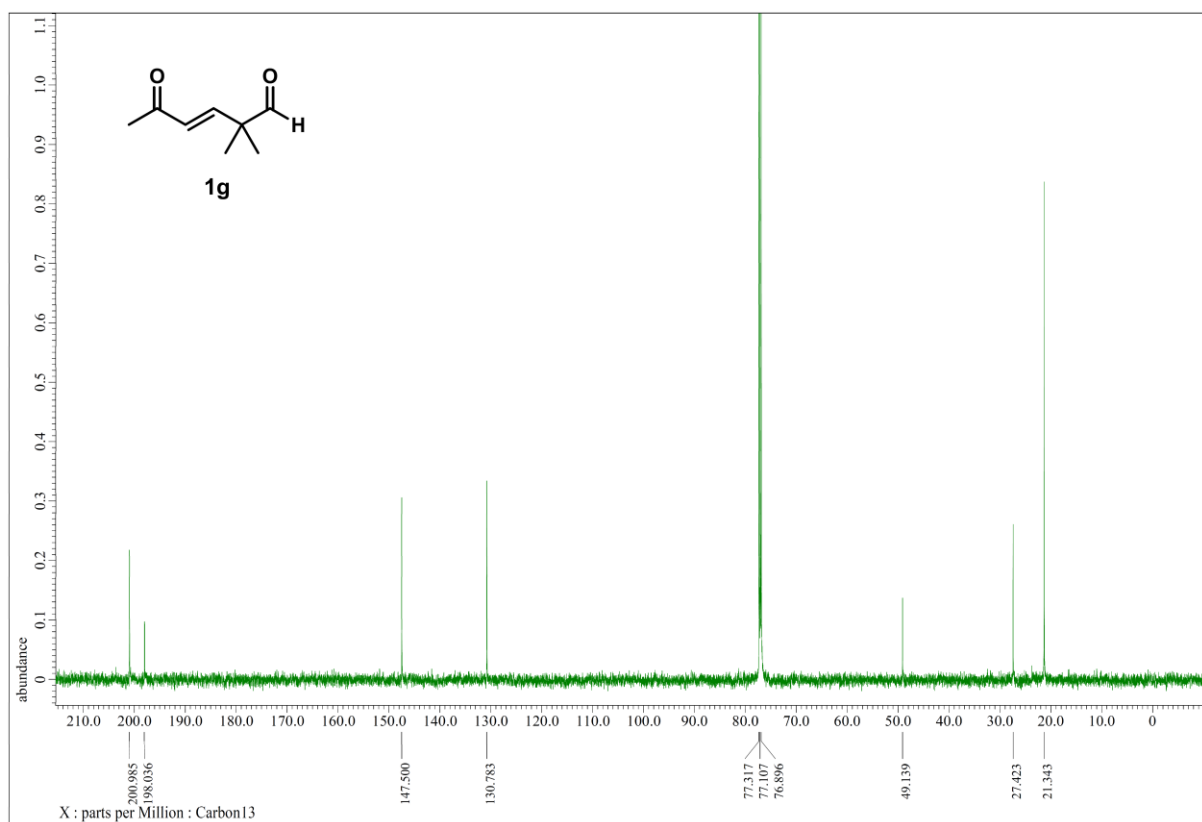

$^1\text{H}$  NMR (600 MHz,  $\text{CDCl}_3$ ) and  $^{13}\text{C}$  NMR (151 MHz,  $\text{CDCl}_3$ ) spectra of **1n**

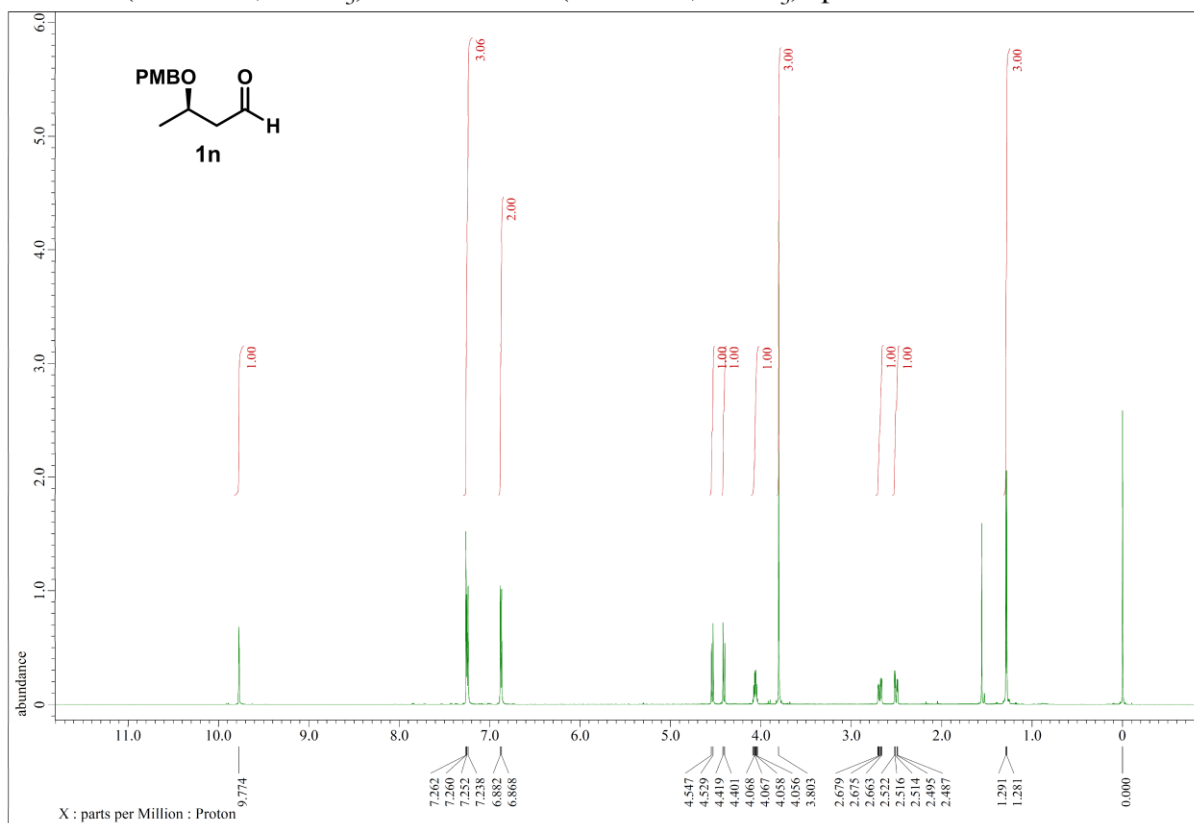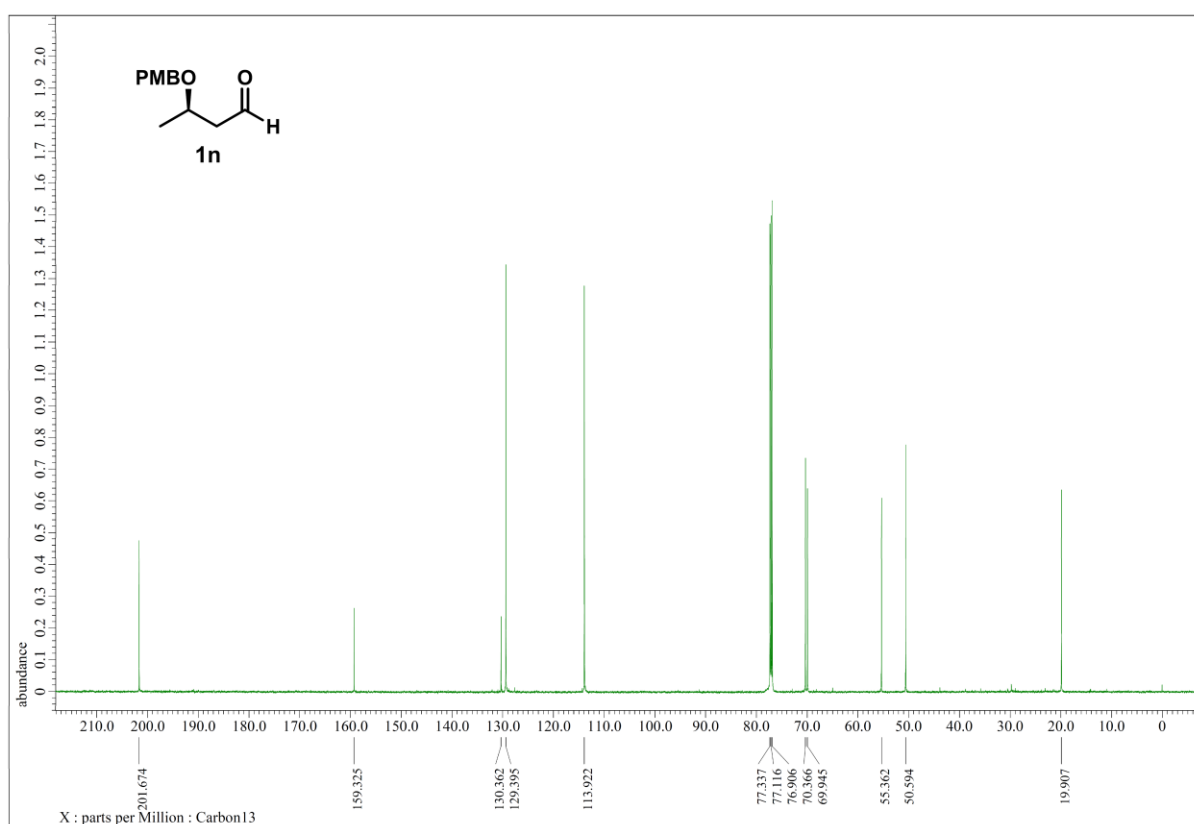

$^1\text{H}$  NMR (600 MHz,  $\text{CDCl}_3$ ) and  $^{13}\text{C}$  NMR (151 MHz,  $\text{CDCl}_3$ ) spectra of **4a**

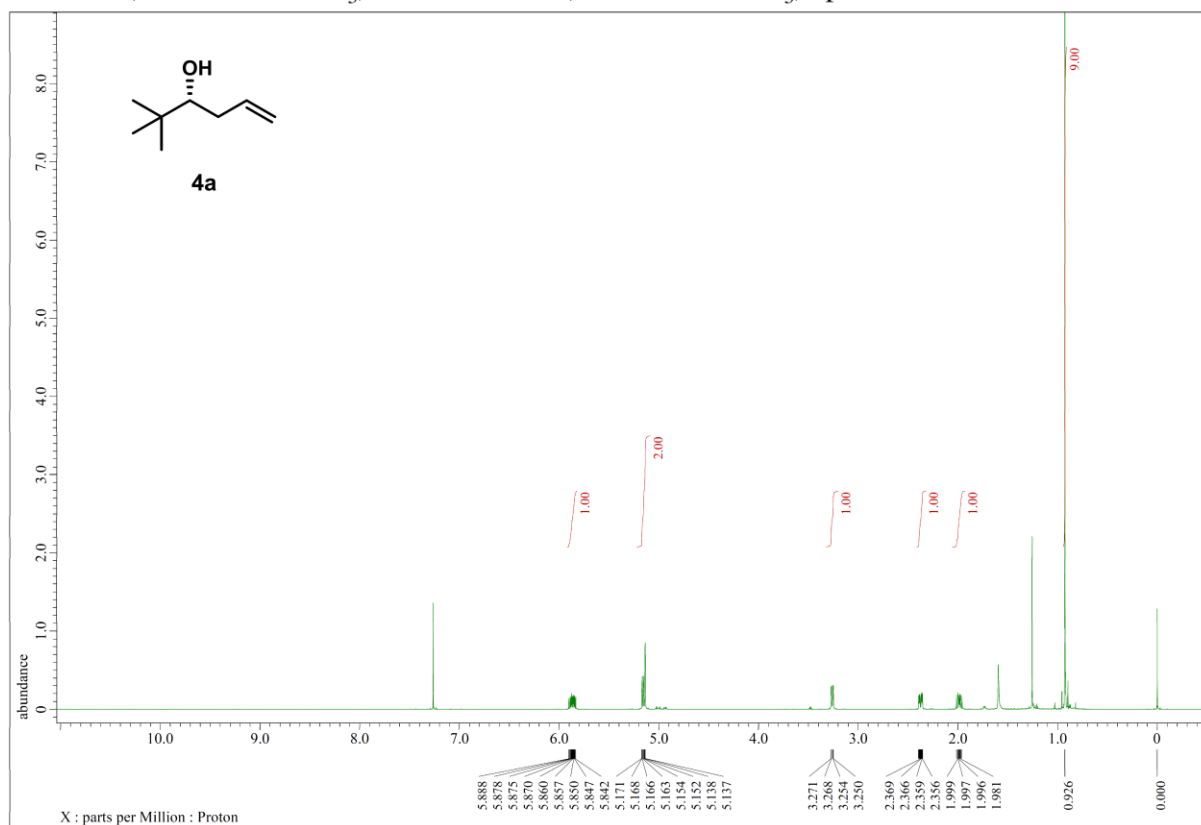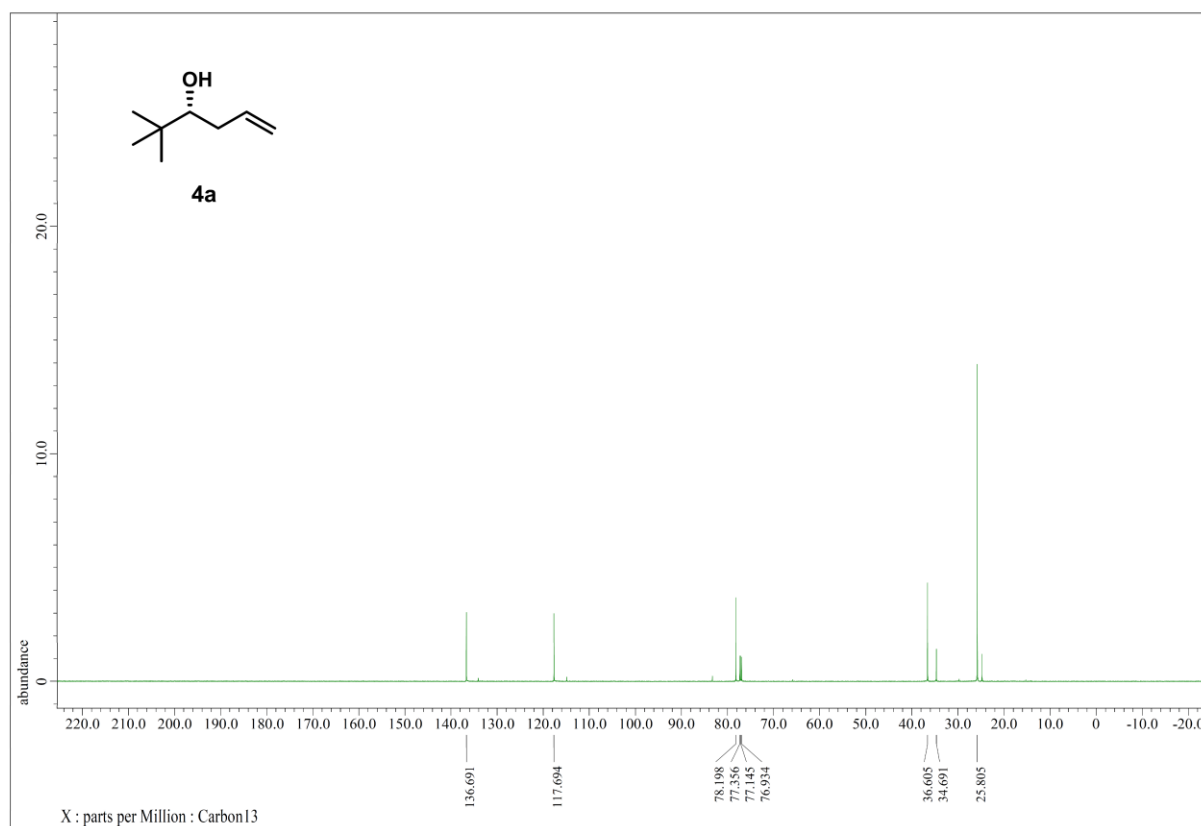

<sup>1</sup>H NMR (600 MHz, CDCl<sub>3</sub>) and <sup>13</sup>C NMR (151 MHz, CDCl<sub>3</sub>) spectra of **4b**

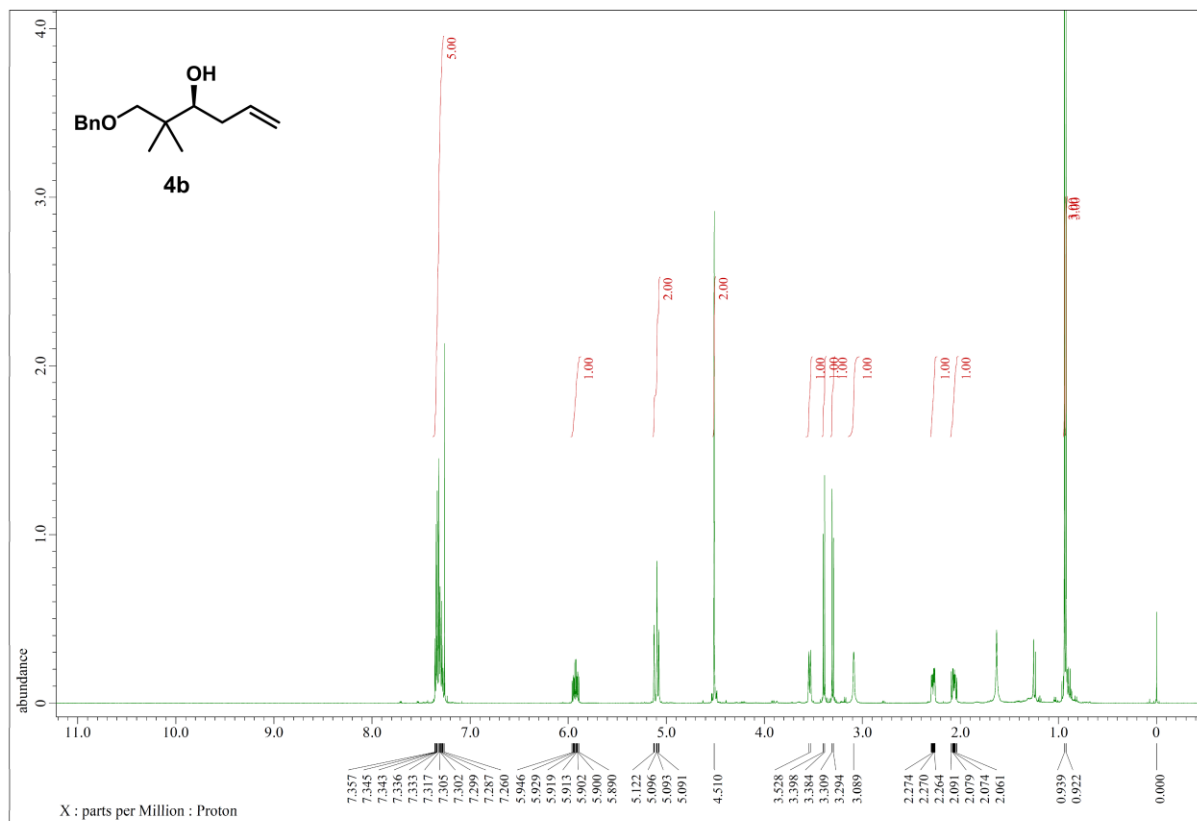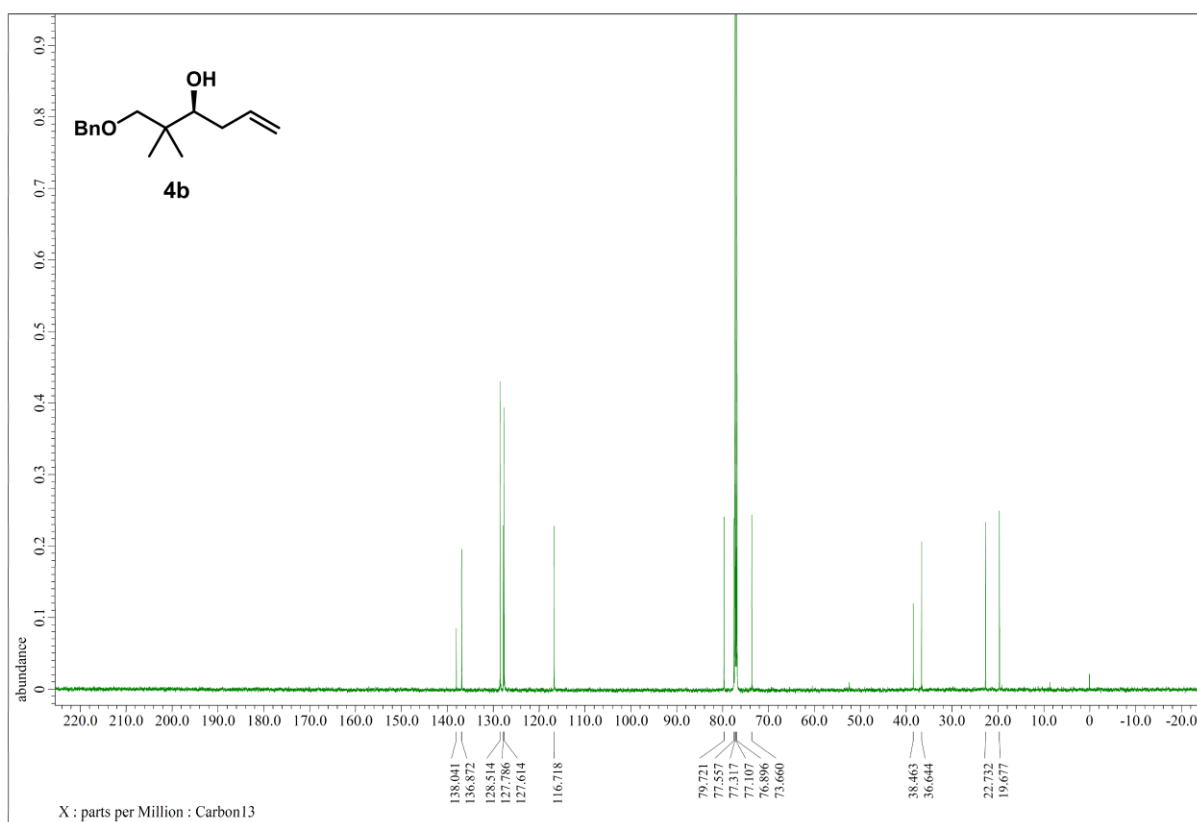

$^1\text{H}$  NMR (600 MHz,  $\text{CDCl}_3$ ) and  $^{13}\text{C}$  NMR (151 MHz,  $\text{CDCl}_3$ ) spectra of **4c**

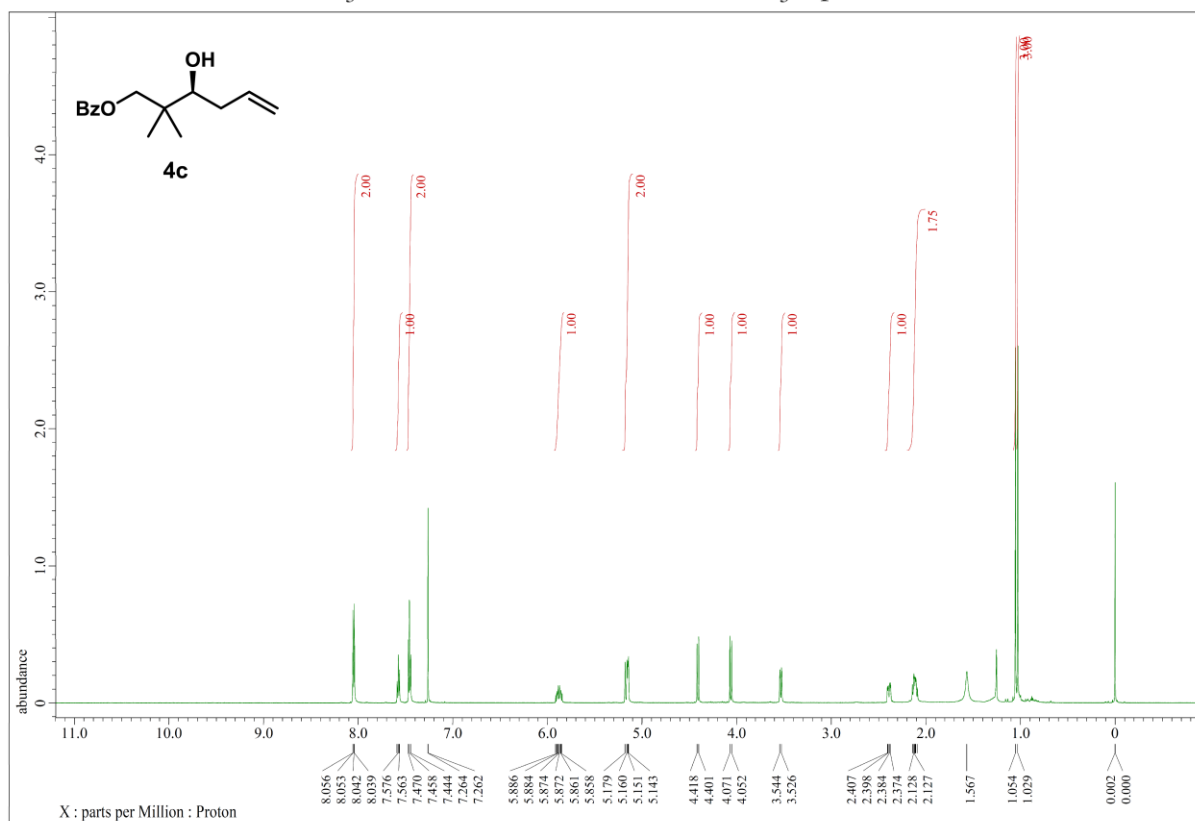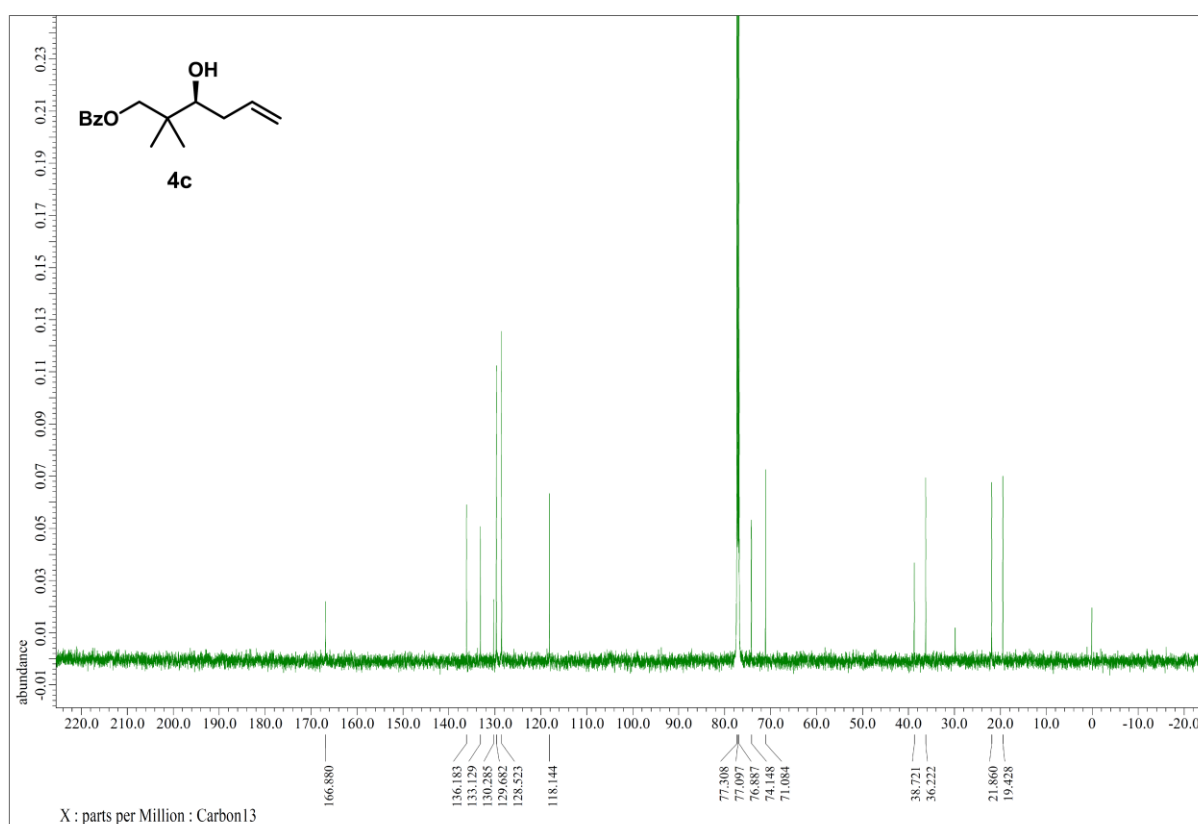

$^1\text{H}$  NMR (600 MHz,  $\text{CDCl}_3$ ) and  $^{13}\text{C}$  NMR (151 MHz,  $\text{CDCl}_3$ ) spectra of **4d**

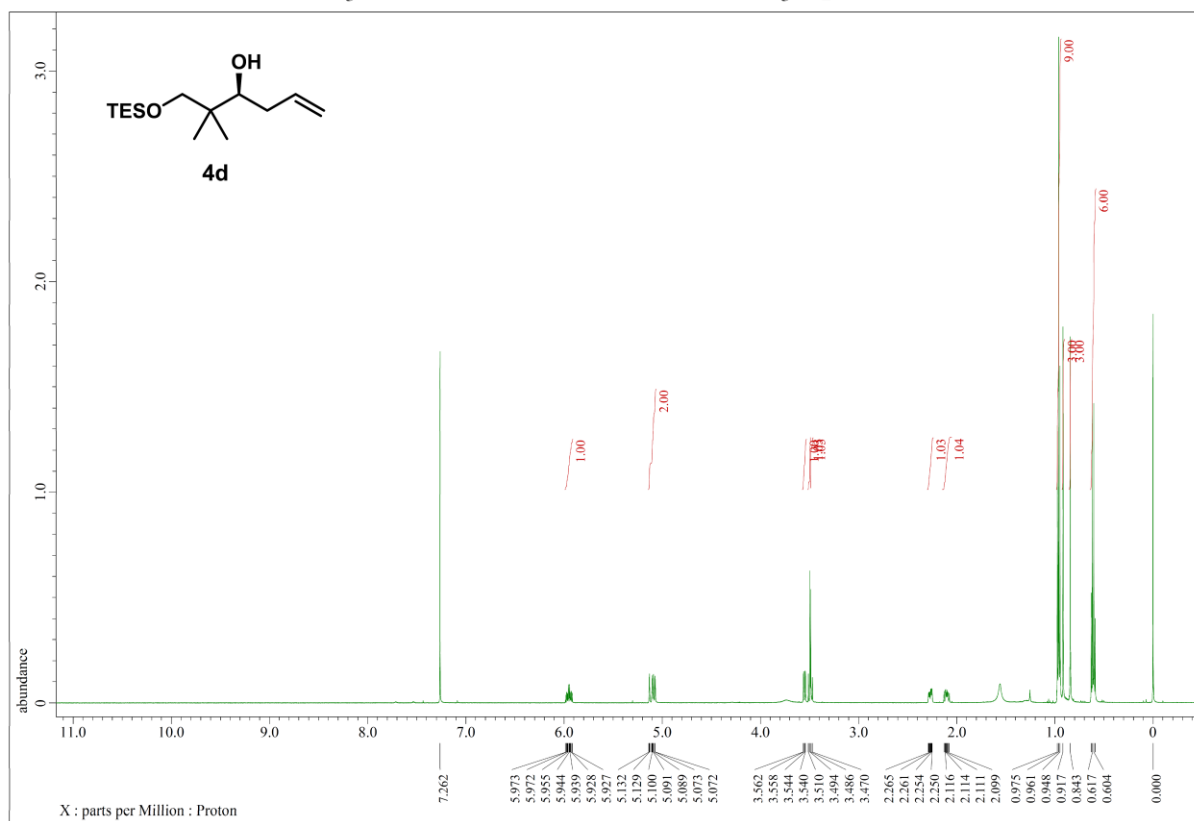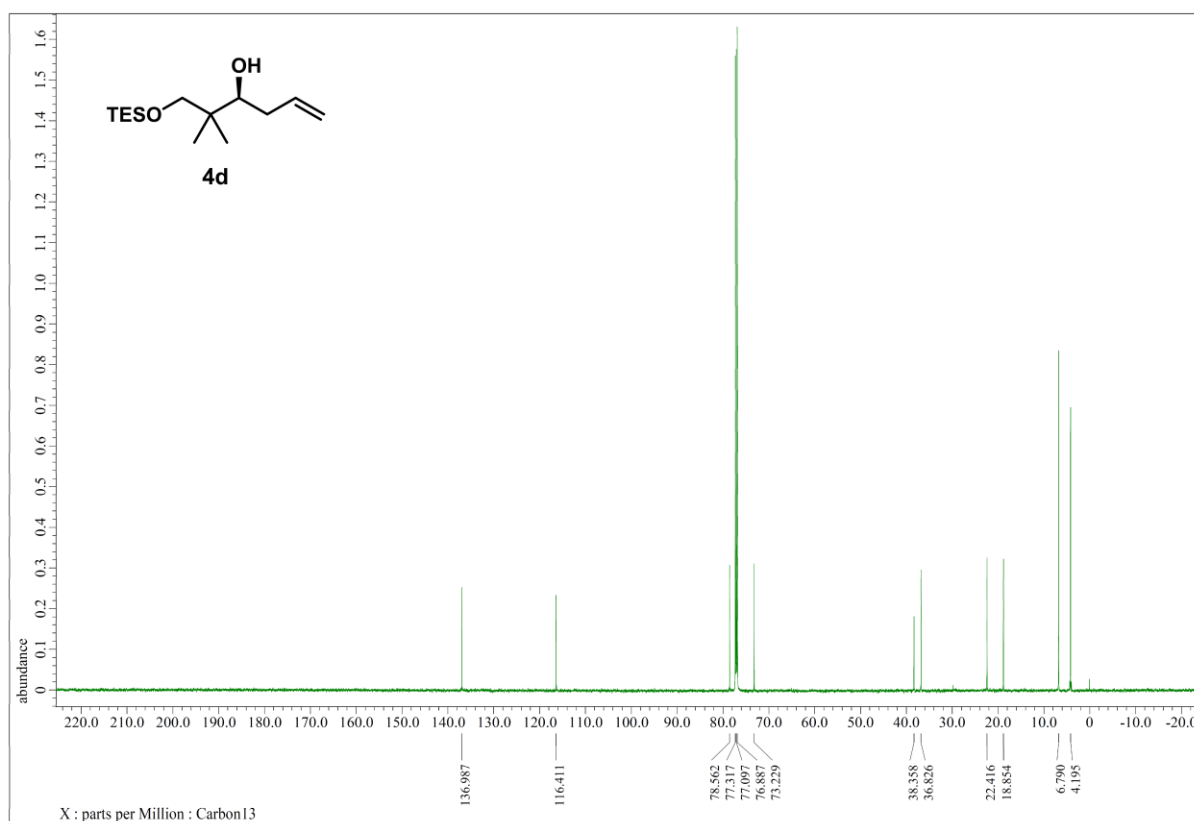



$^1\text{H}$  NMR (600 MHz,  $\text{CDCl}_3$ ) and  $^{13}\text{C}$  NMR (151 MHz,  $\text{CDCl}_3$ ) spectra of **4e**

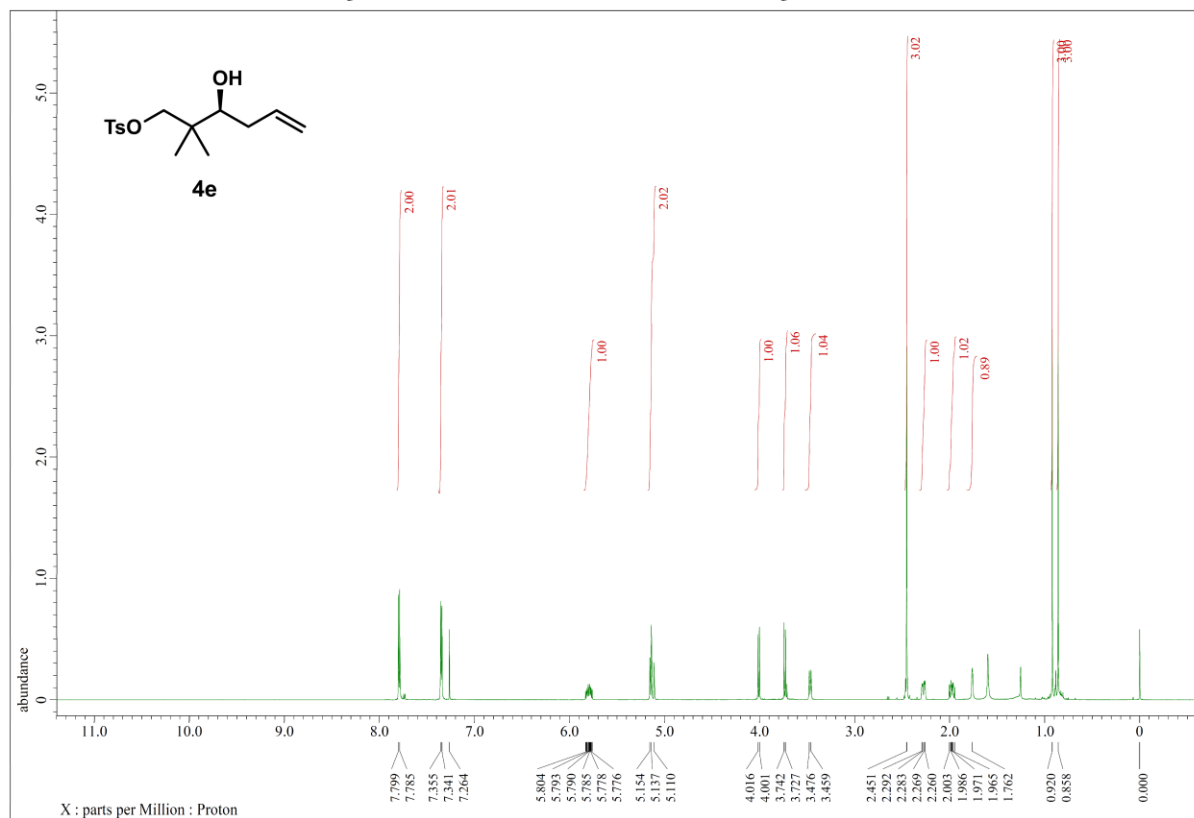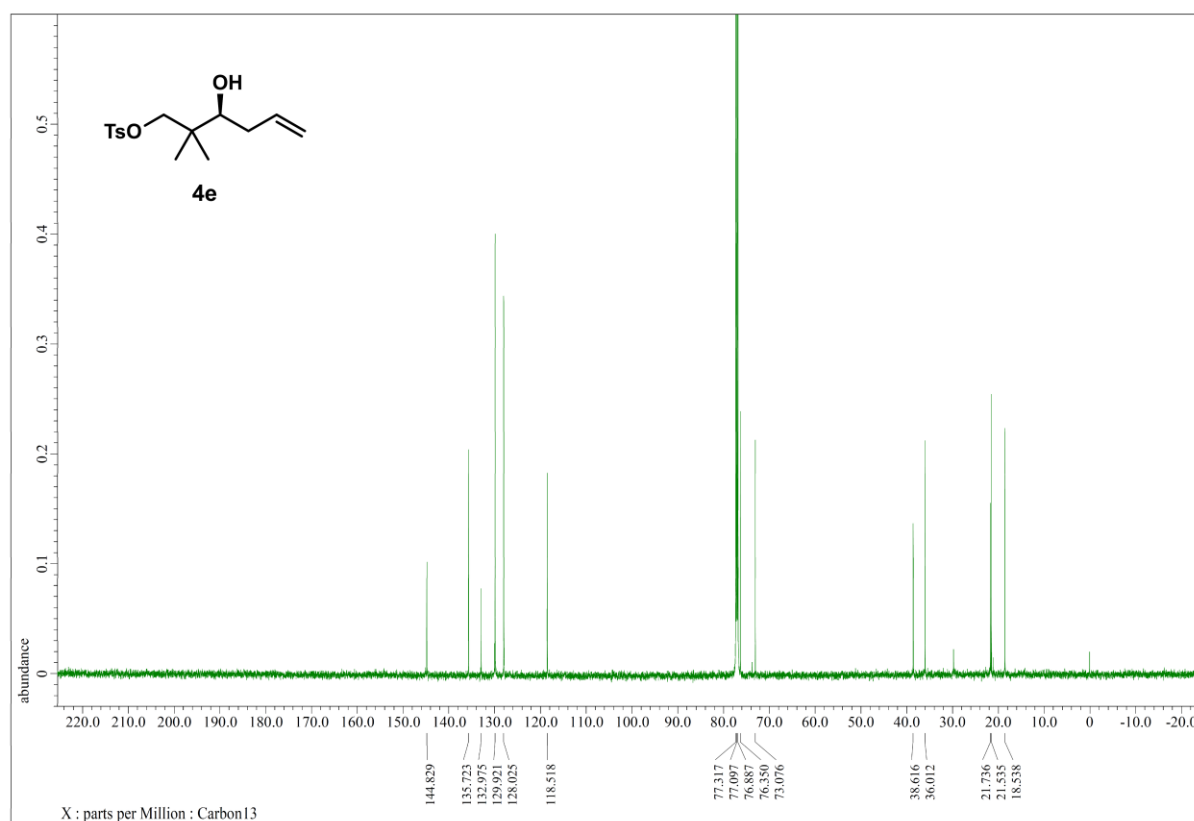

$^1\text{H}$  NMR (600 MHz,  $\text{CDCl}_3$ ) and  $^{13}\text{C}$  NMR (151 MHz,  $\text{CDCl}_3$ ) spectra of **4f**

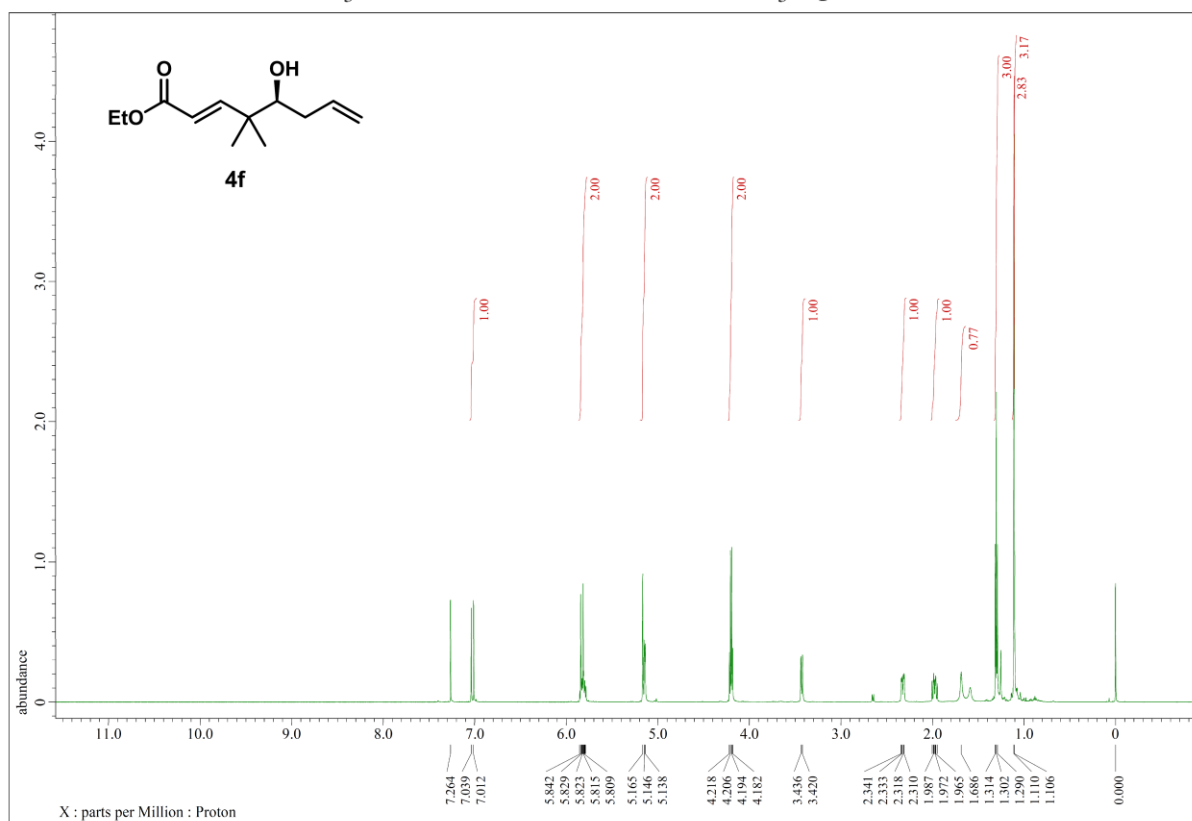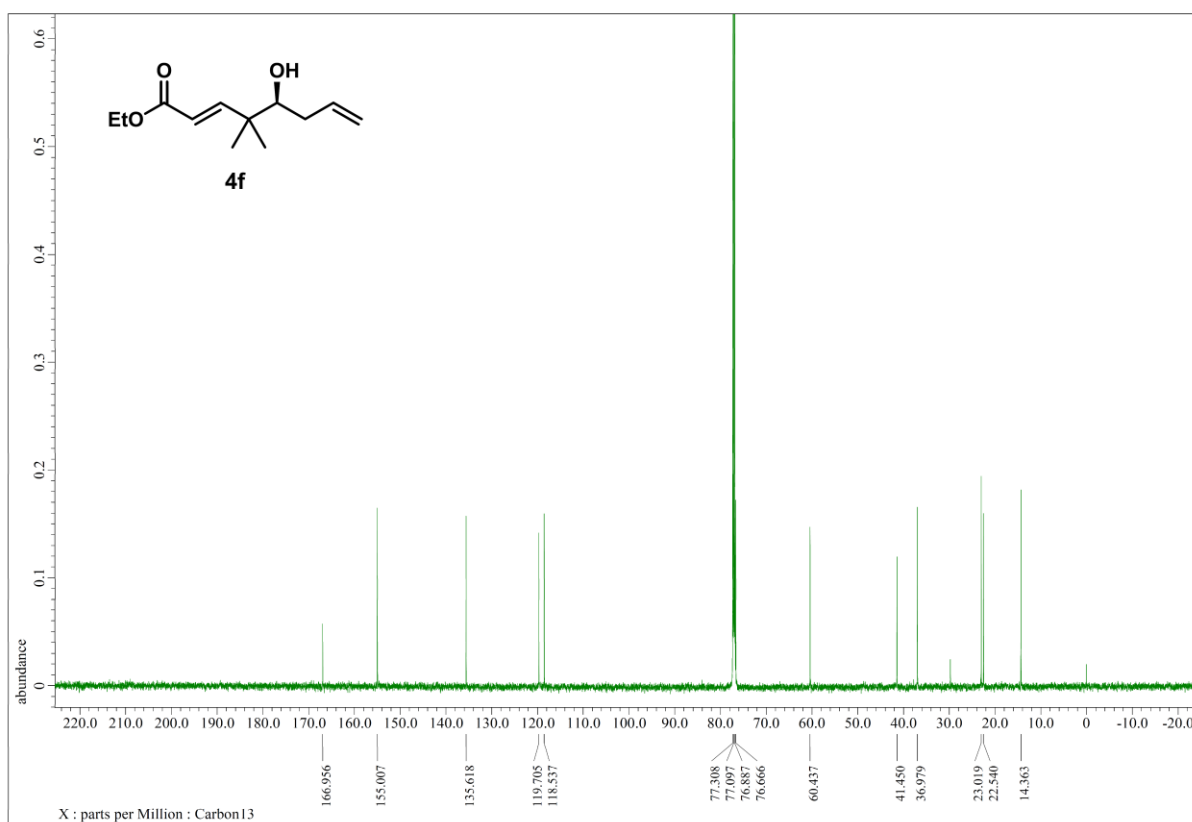

$^1\text{H}$  NMR (600 MHz,  $\text{CDCl}_3$ ) and  $^{13}\text{C}$  NMR (151 MHz,  $\text{CDCl}_3$ ) spectra of **4g**

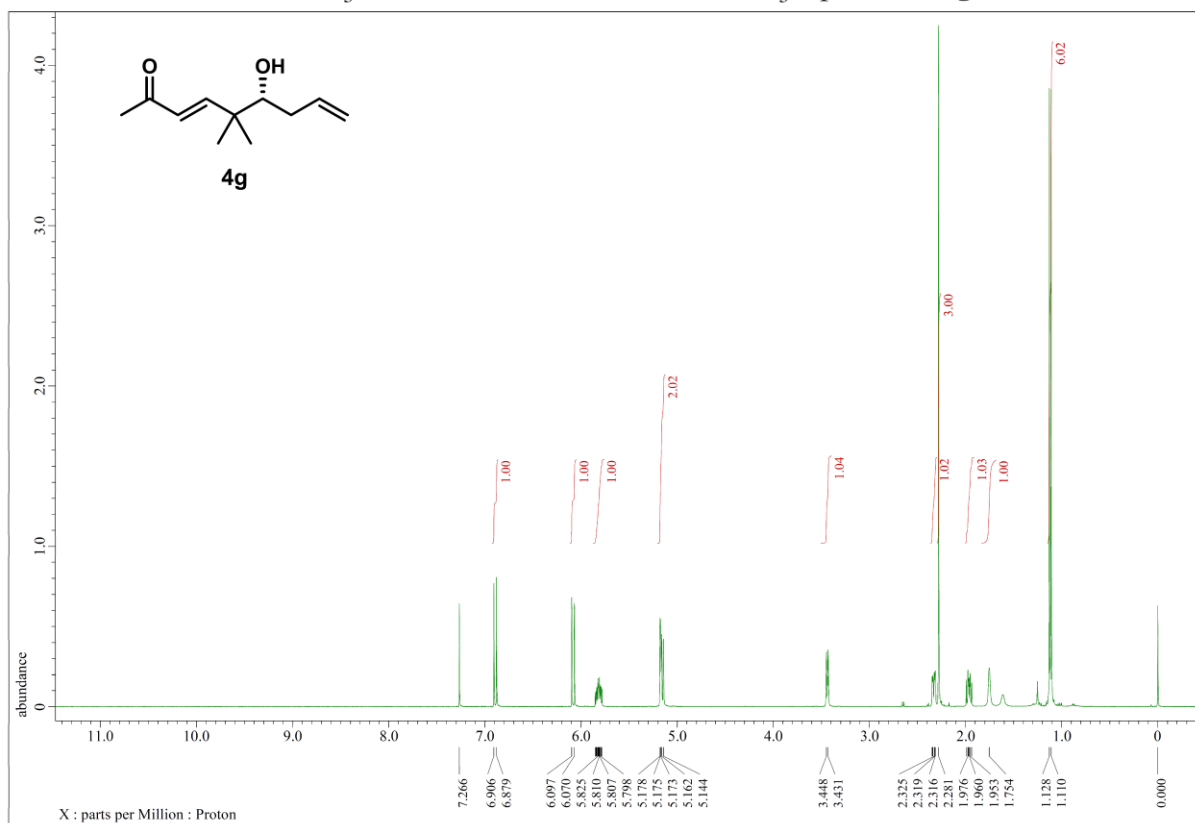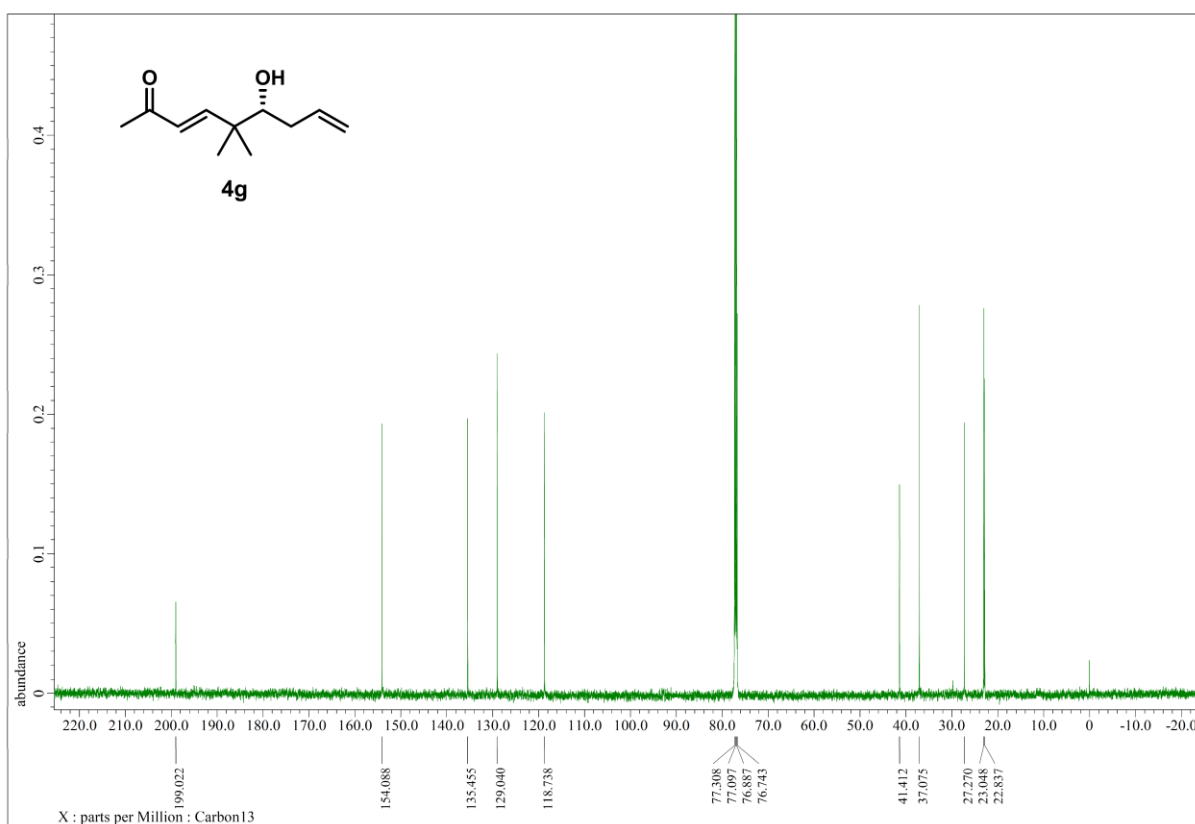

$^1\text{H}$  NMR (600 MHz,  $\text{CDCl}_3$ ) and  $^{13}\text{C}$  NMR (151 MHz,  $\text{CDCl}_3$ ) spectra of **4h**

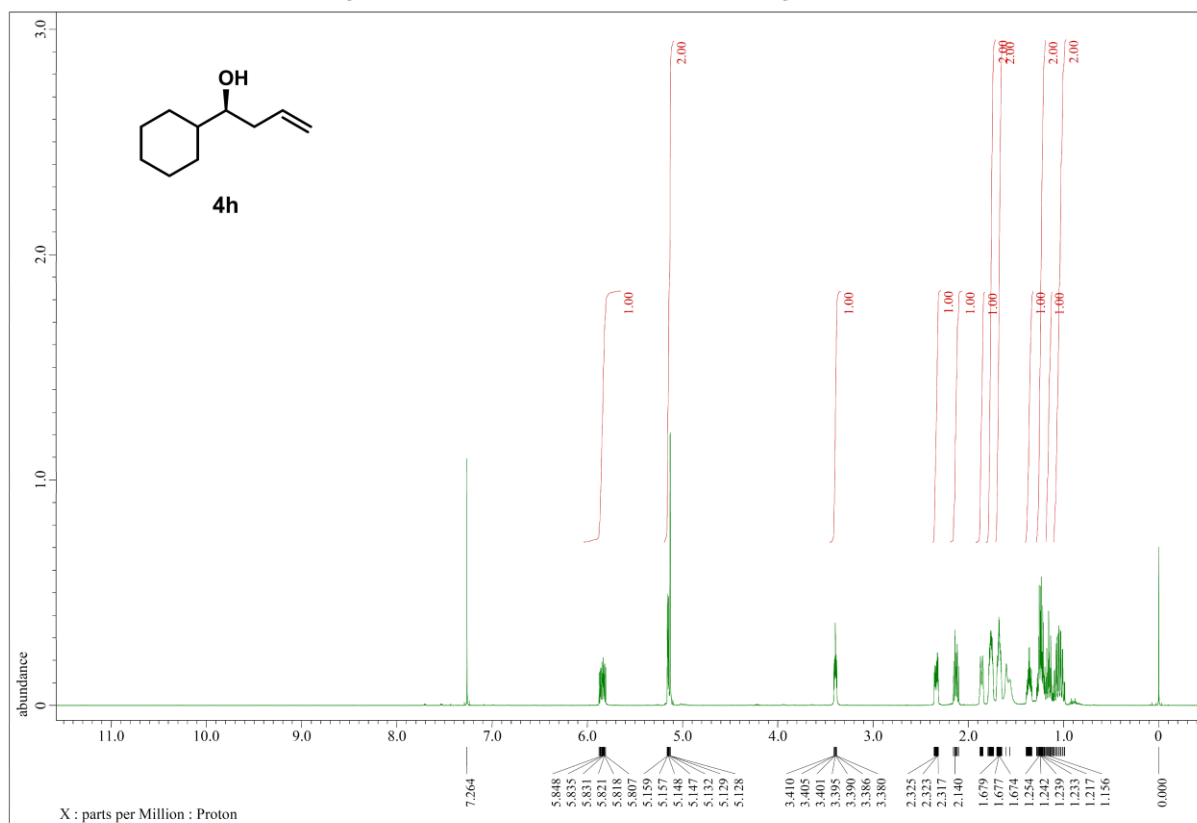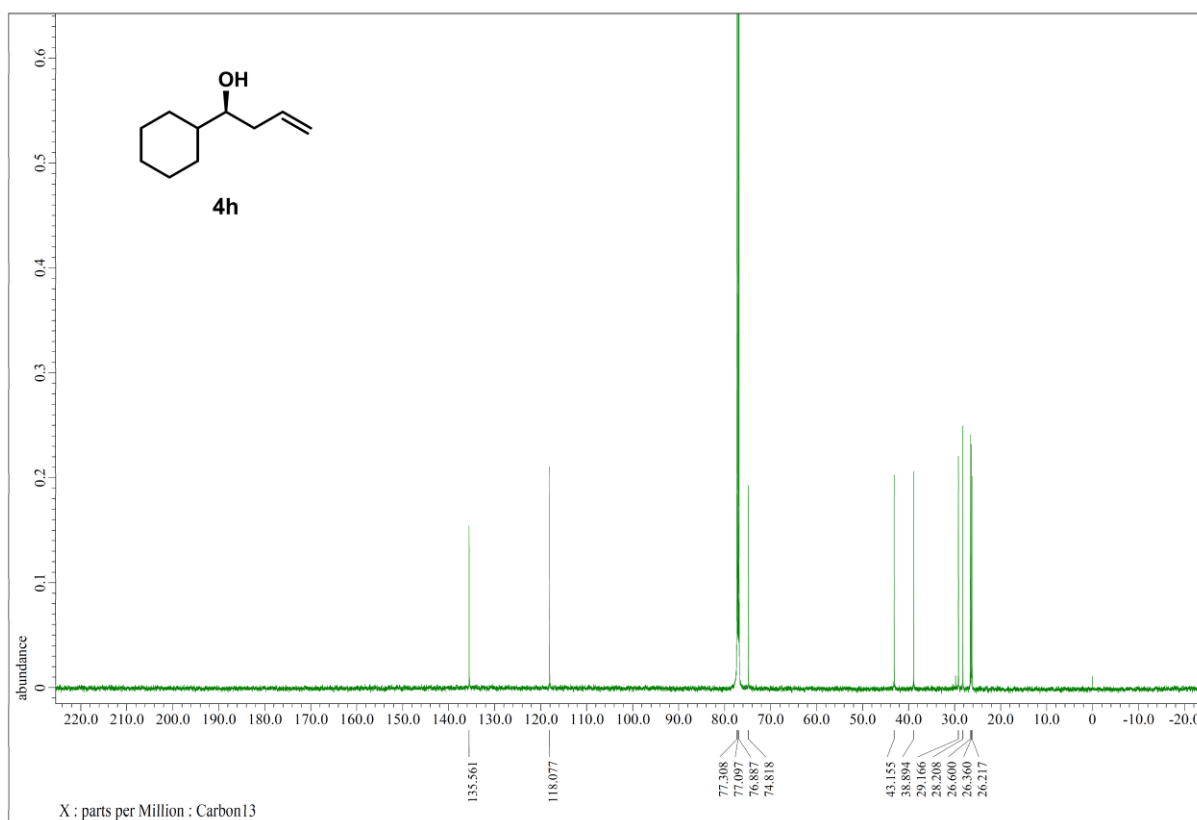

$^1\text{H}$  NMR (600 MHz,  $\text{CDCl}_3$ ) and  $^{13}\text{C}$  NMR (151 MHz,  $\text{CDCl}_3$ ) spectra of **4i**

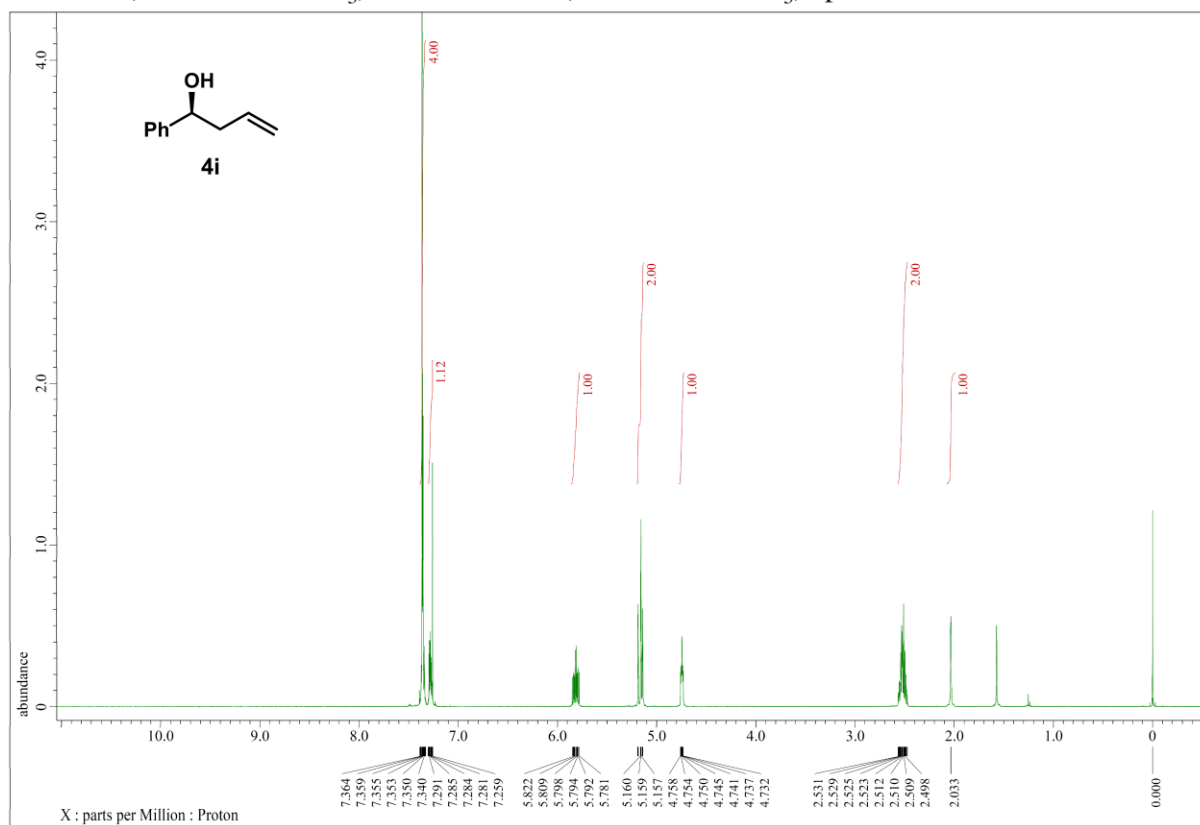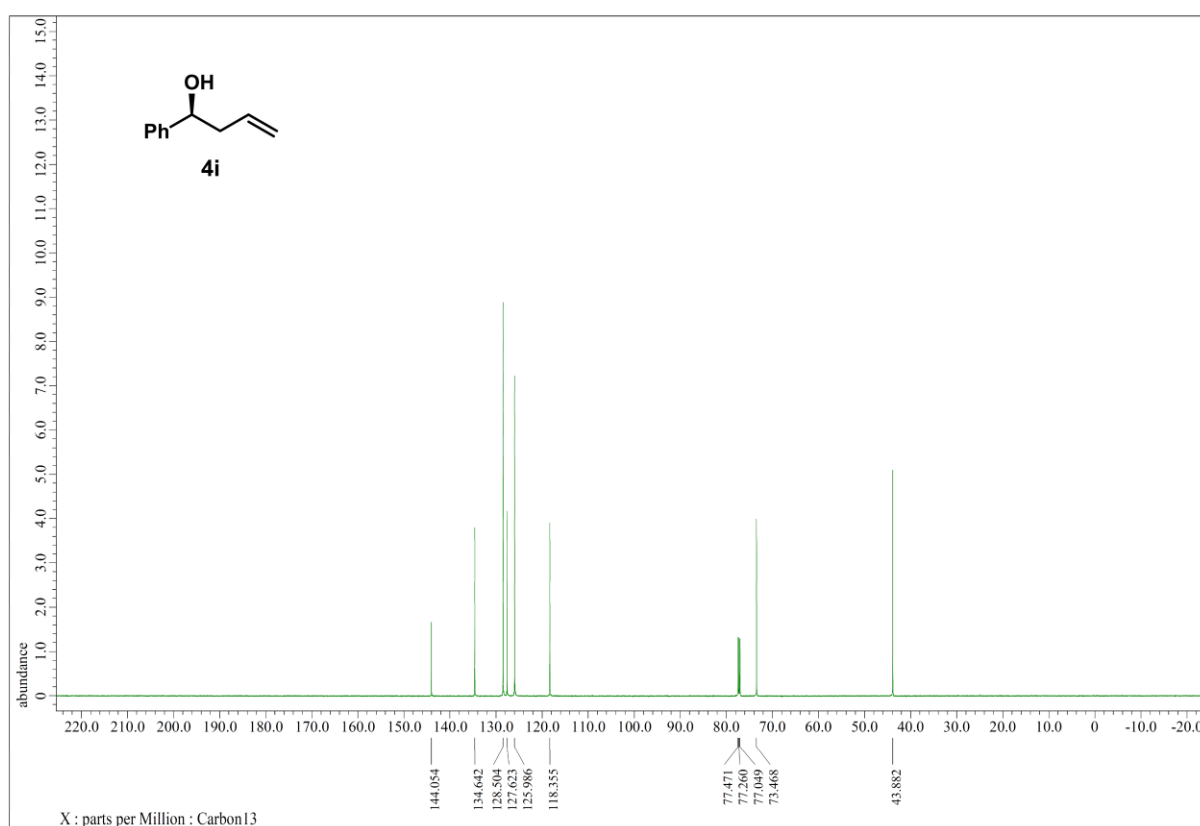

$^1\text{H}$  NMR (600 MHz,  $\text{CDCl}_3$ ) and  $^{13}\text{C}$  NMR (151 MHz,  $\text{CDCl}_3$ ) spectra of **4j**

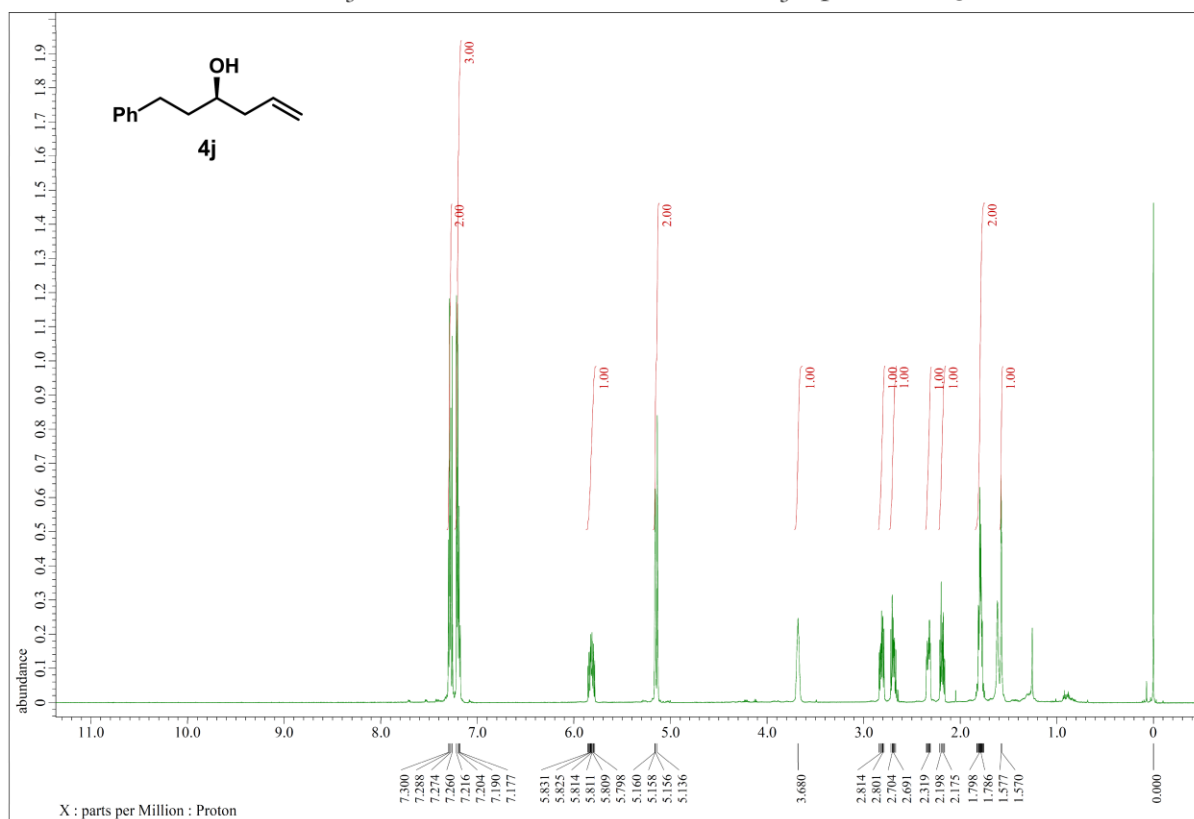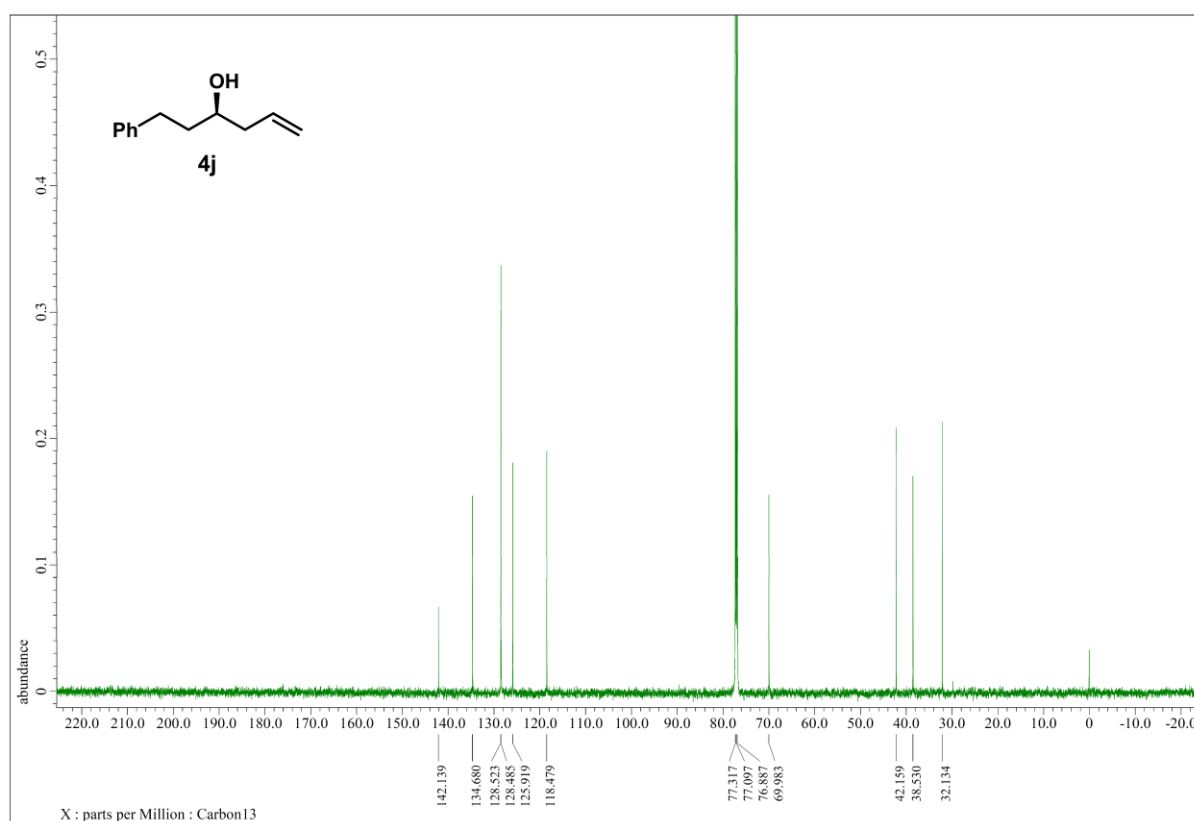

$^1\text{H}$  NMR (600 MHz,  $\text{CDCl}_3$ ) and  $^{13}\text{C}$  NMR (151 MHz,  $\text{CDCl}_3$ ) spectra of **4n**

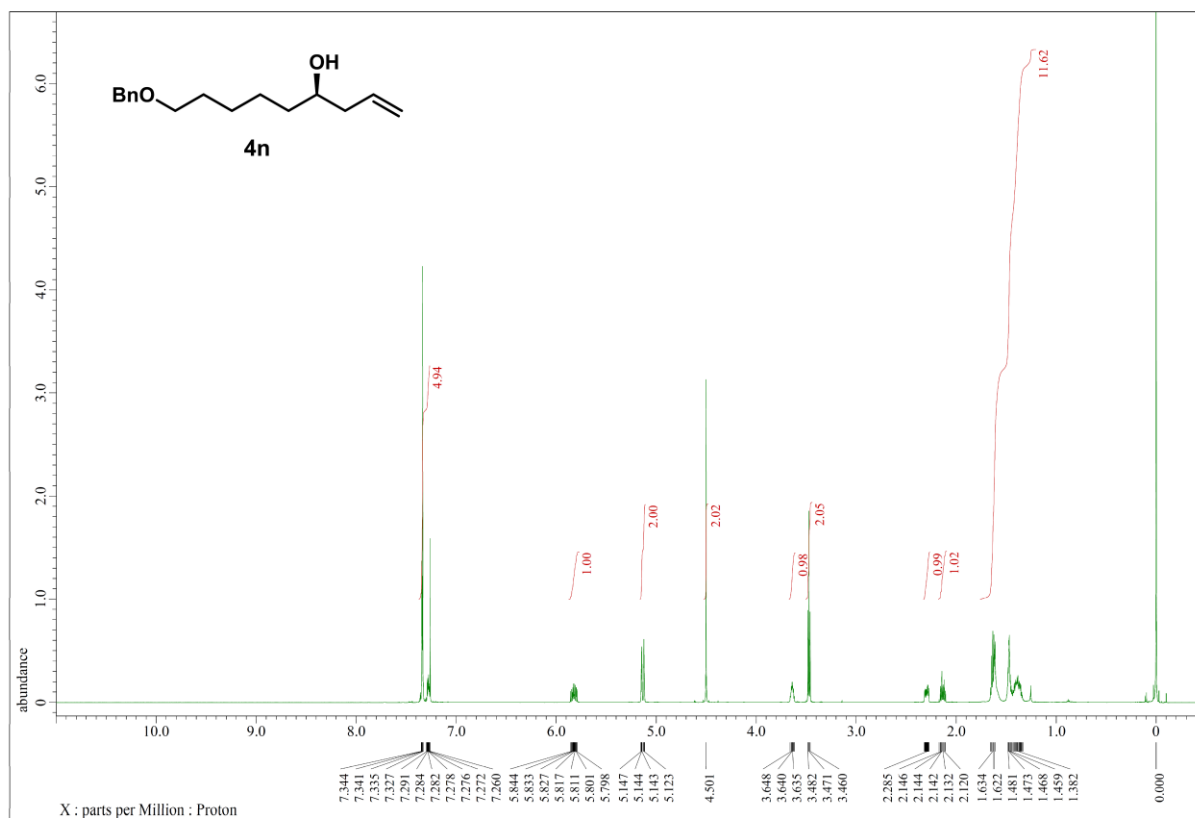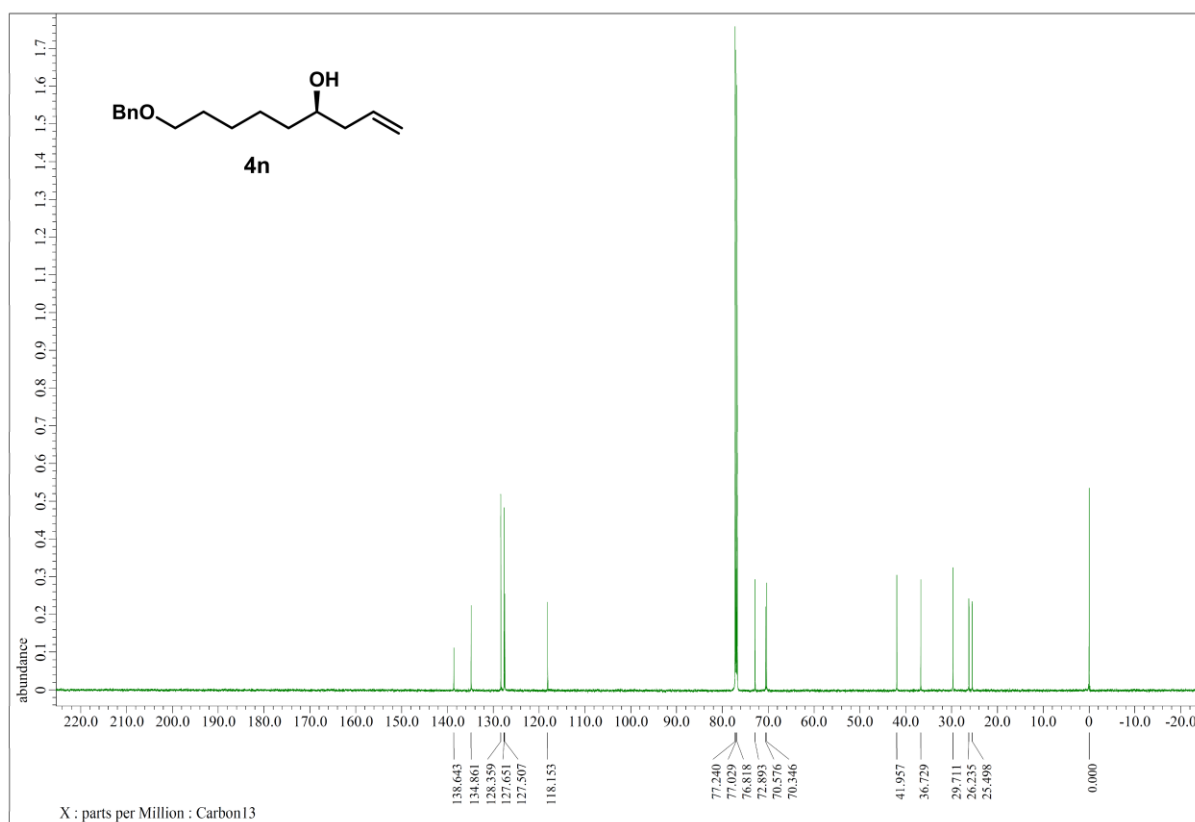

$^1\text{H}$  NMR (600 MHz,  $\text{CDCl}_3$ ) and  $^{13}\text{C}$  NMR (151 MHz,  $\text{CDCl}_3$ ) spectra of **4I**

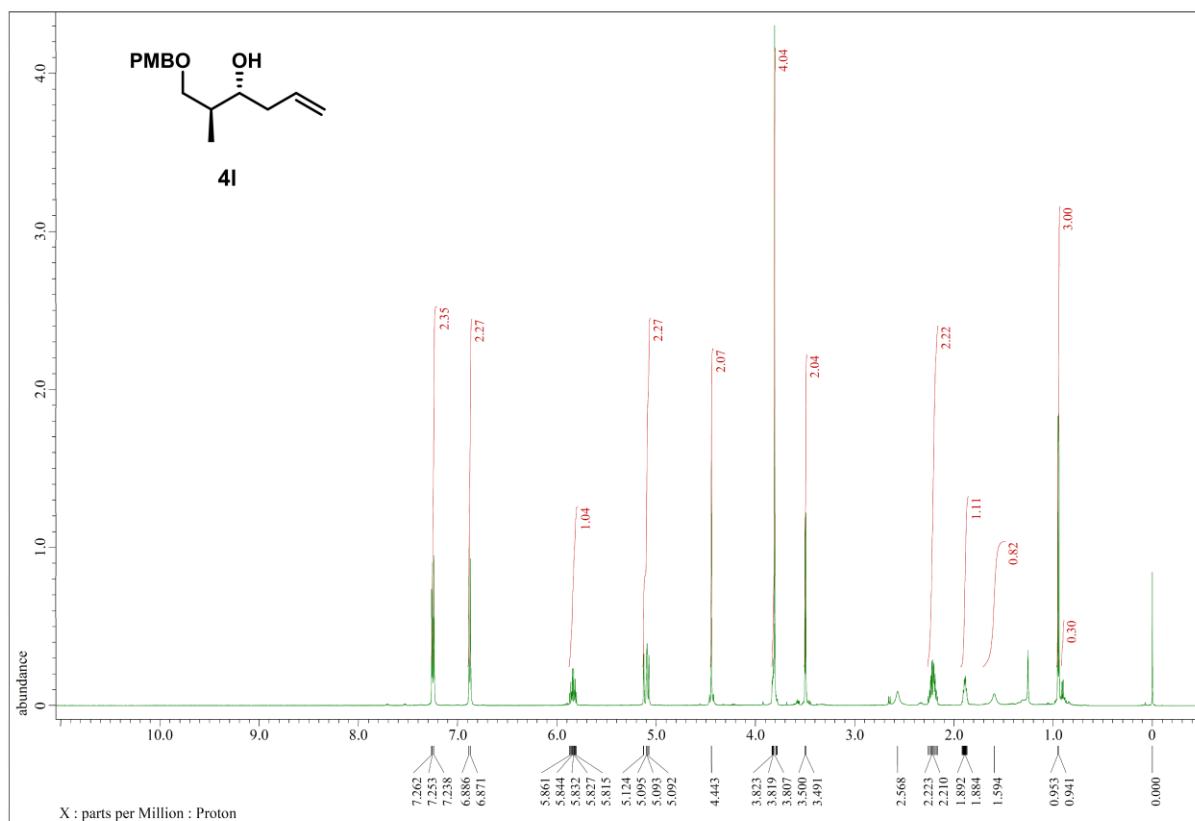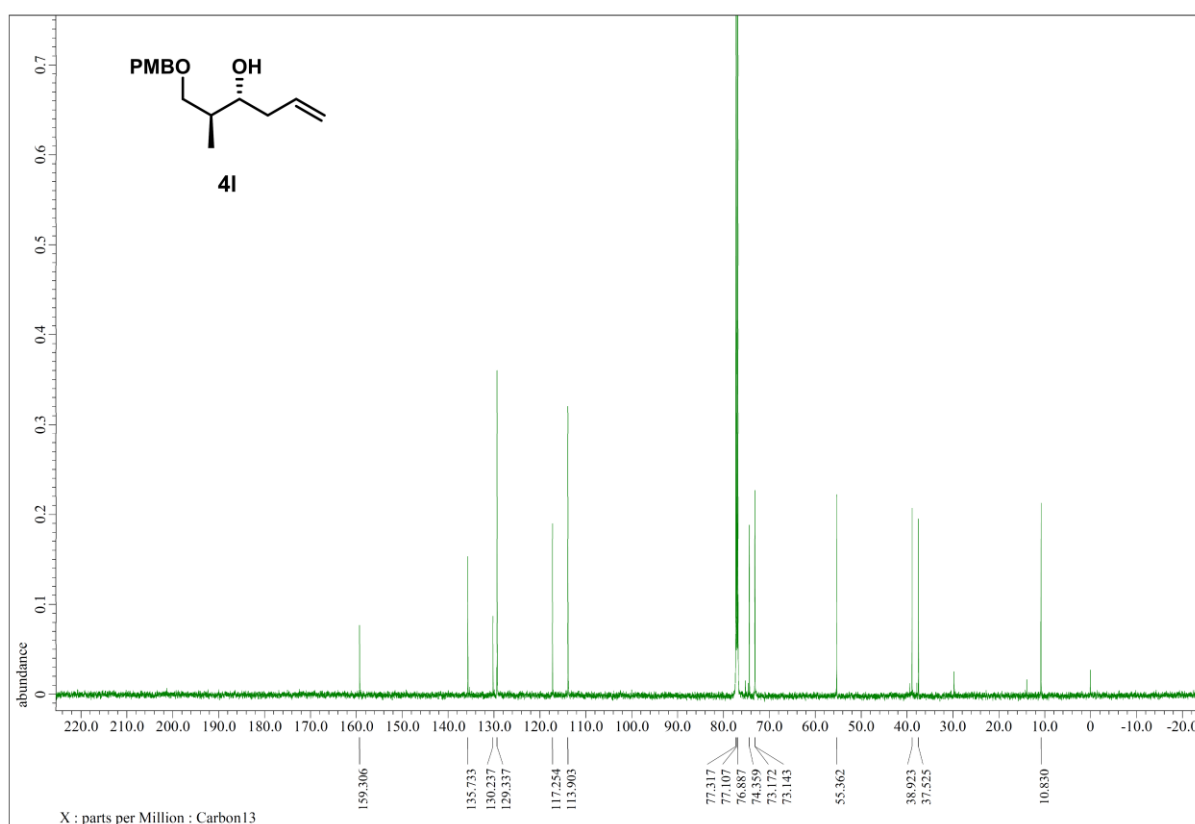



$^1\text{H}$  NMR (600 MHz,  $\text{CDCl}_3$ ) and  $^{13}\text{C}$  NMR (151 MHz,  $\text{CDCl}_3$ ) spectra of **4m**

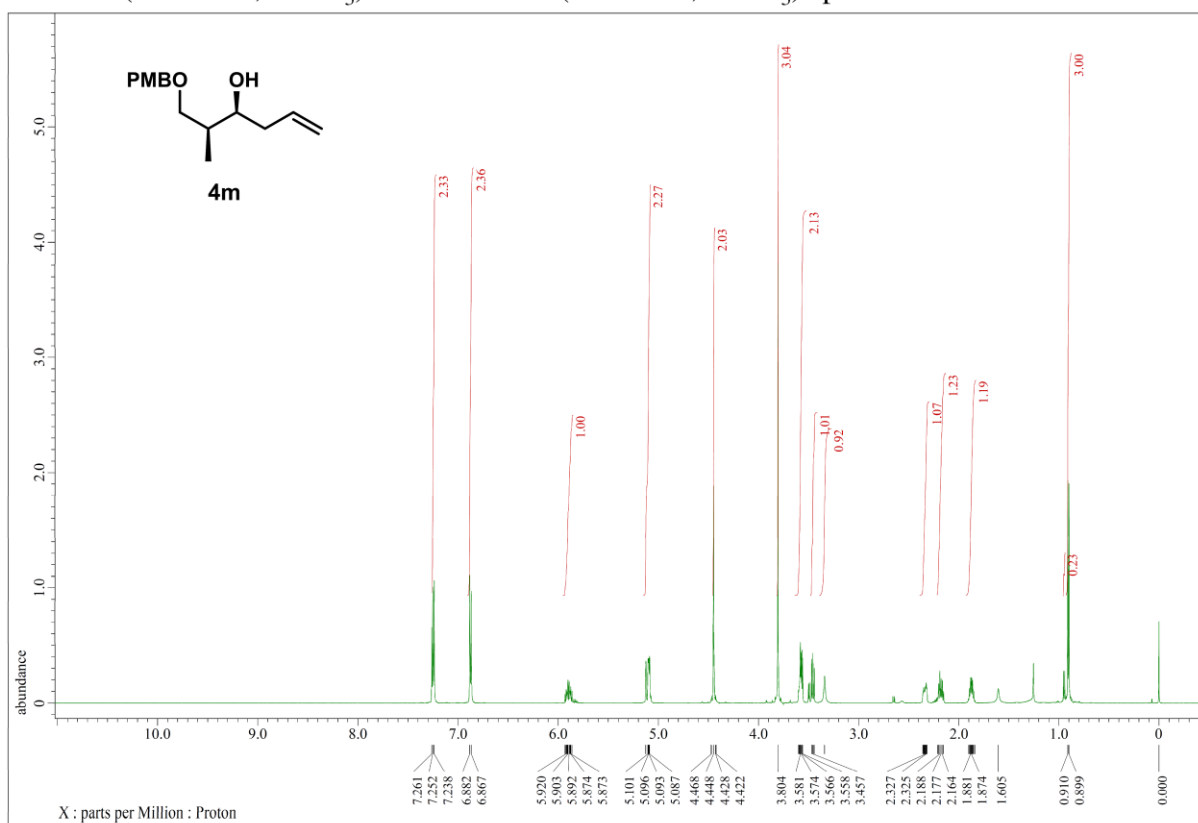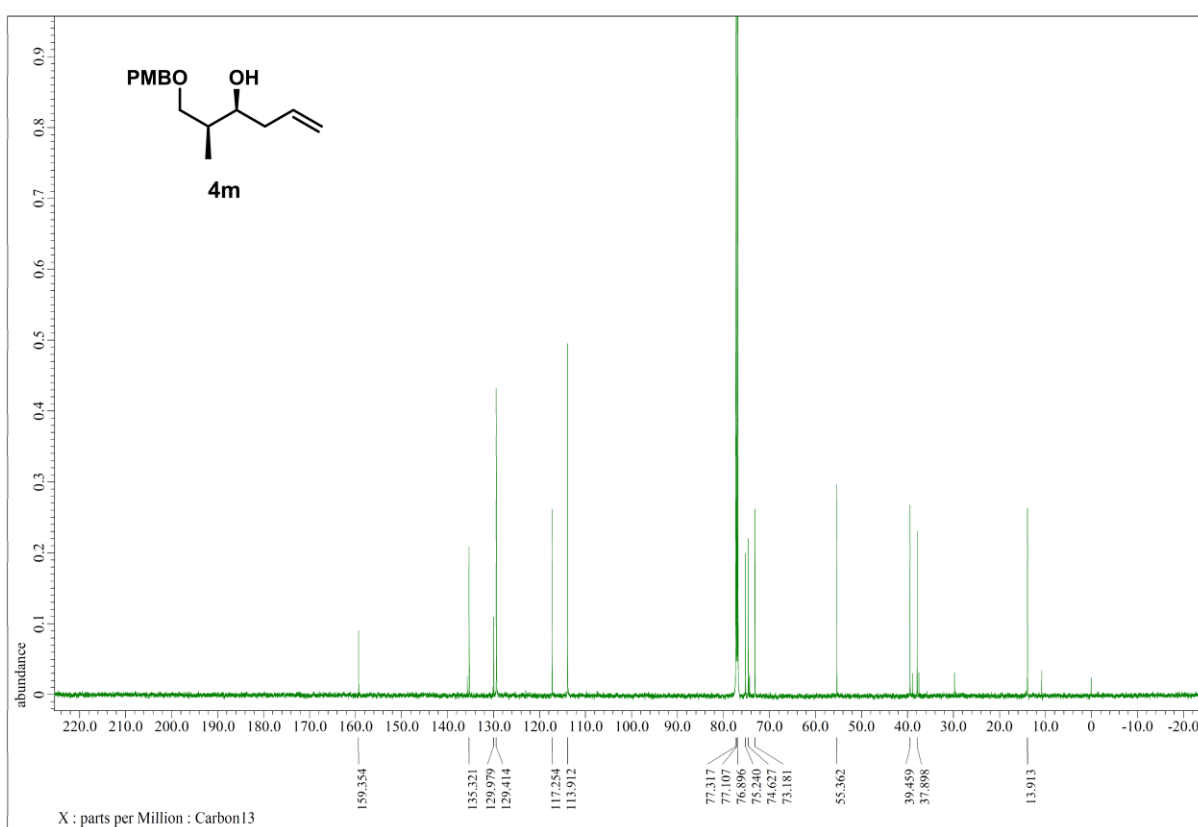

$^1\text{H}$  NMR (600 MHz,  $\text{CDCl}_3$ ) and  $^{13}\text{C}$  NMR (151 MHz,  $\text{CDCl}_3$ ) spectra of **4n**

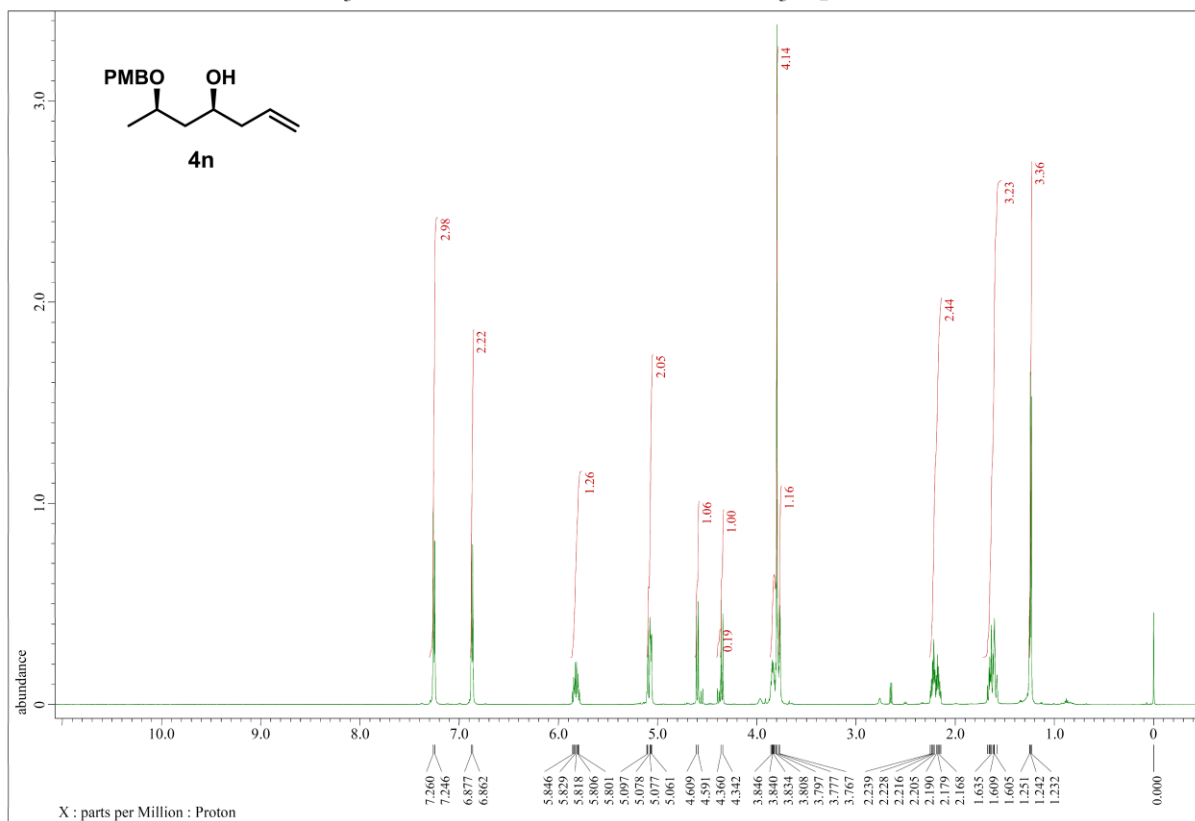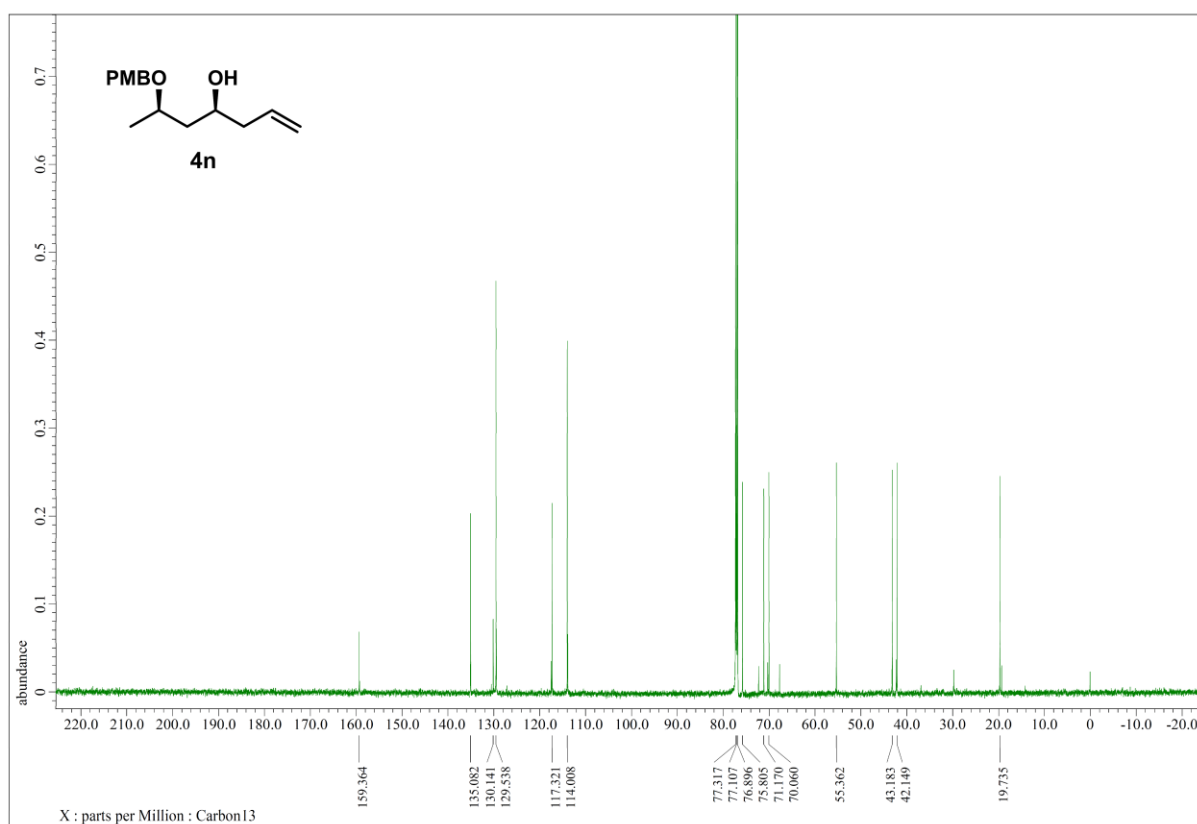

$^1\text{H}$  NMR (600 MHz,  $\text{CDCl}_3$ ) and  $^{13}\text{C}$  NMR (151 MHz,  $\text{CDCl}_3$ ) spectra of **4o**

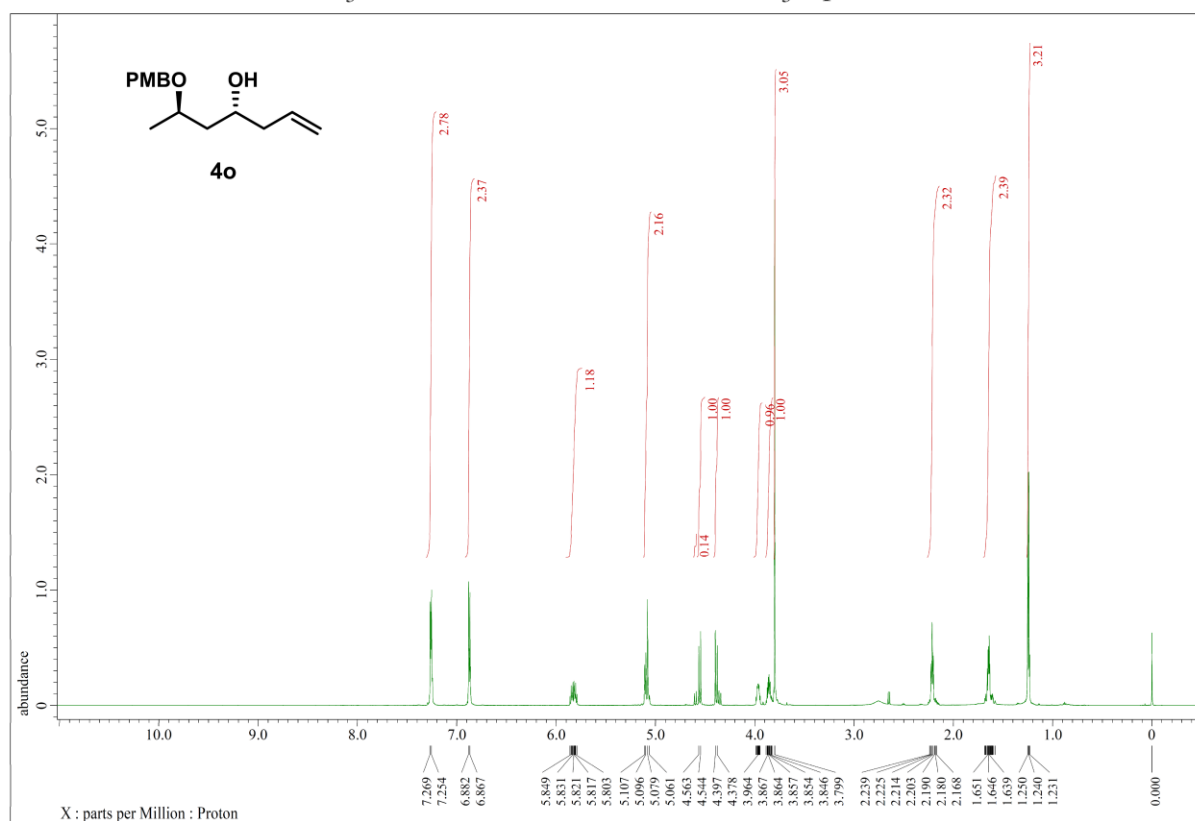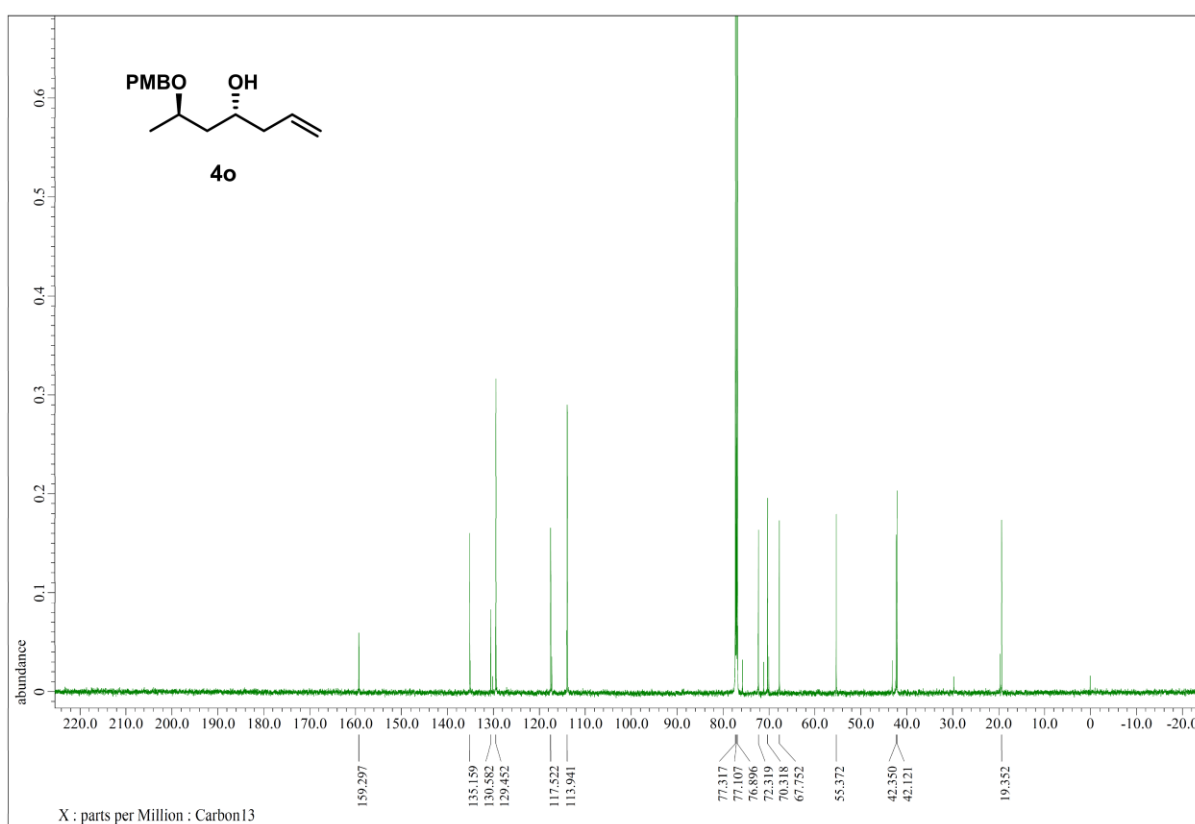

$^1\text{H}$  NMR (600 MHz,  $\text{CDCl}_3$ ) and  $^{13}\text{C}$  NMR (151 MHz,  $\text{CDCl}_3$ ) spectra of **4p**

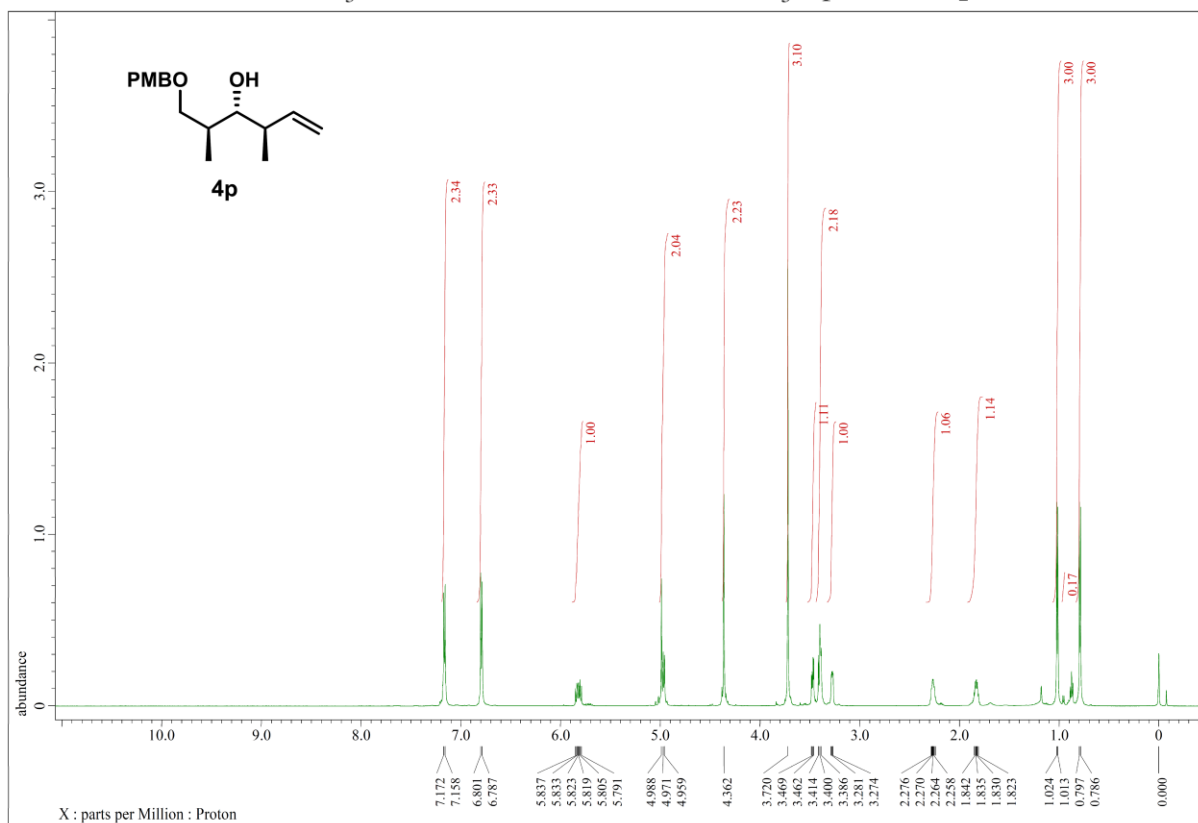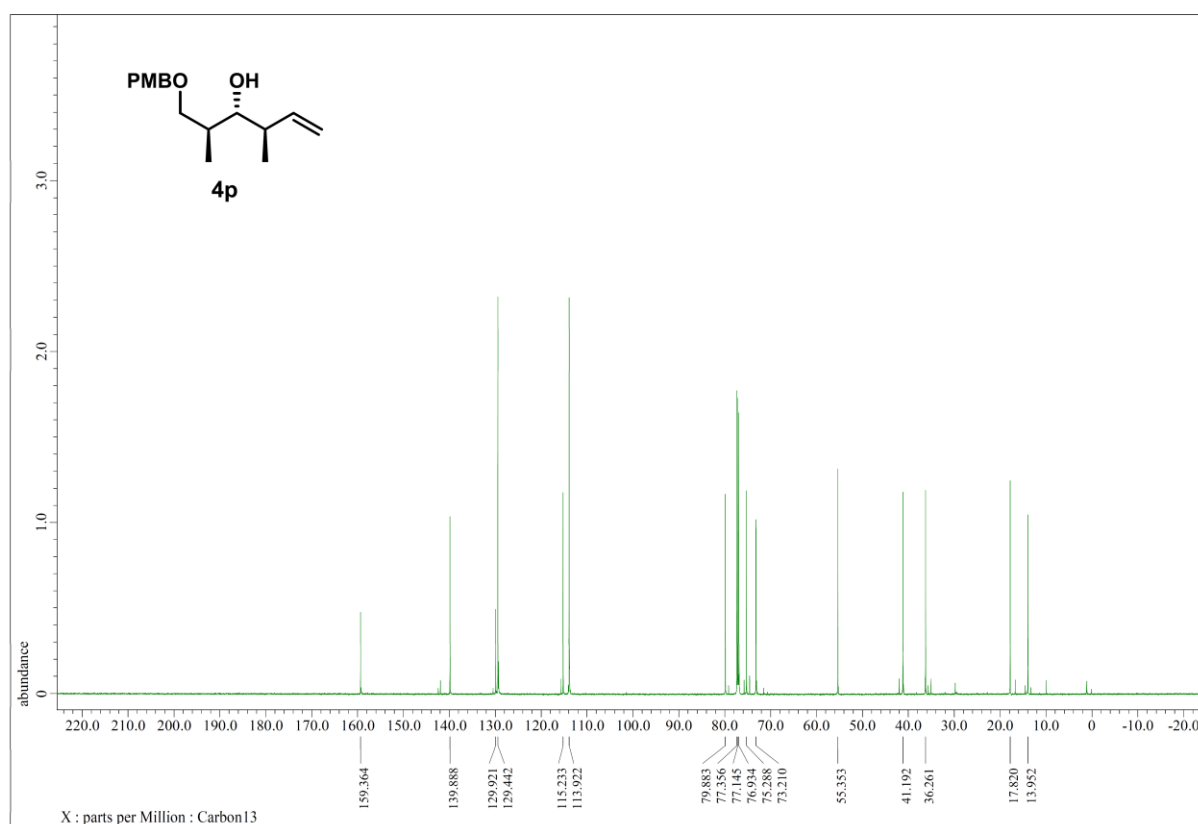

$^1\text{H}$  NMR (600 MHz,  $\text{CDCl}_3$ ) and  $^{13}\text{C}$  NMR (151 MHz,  $\text{CDCl}_3$ ) spectra of **4q**

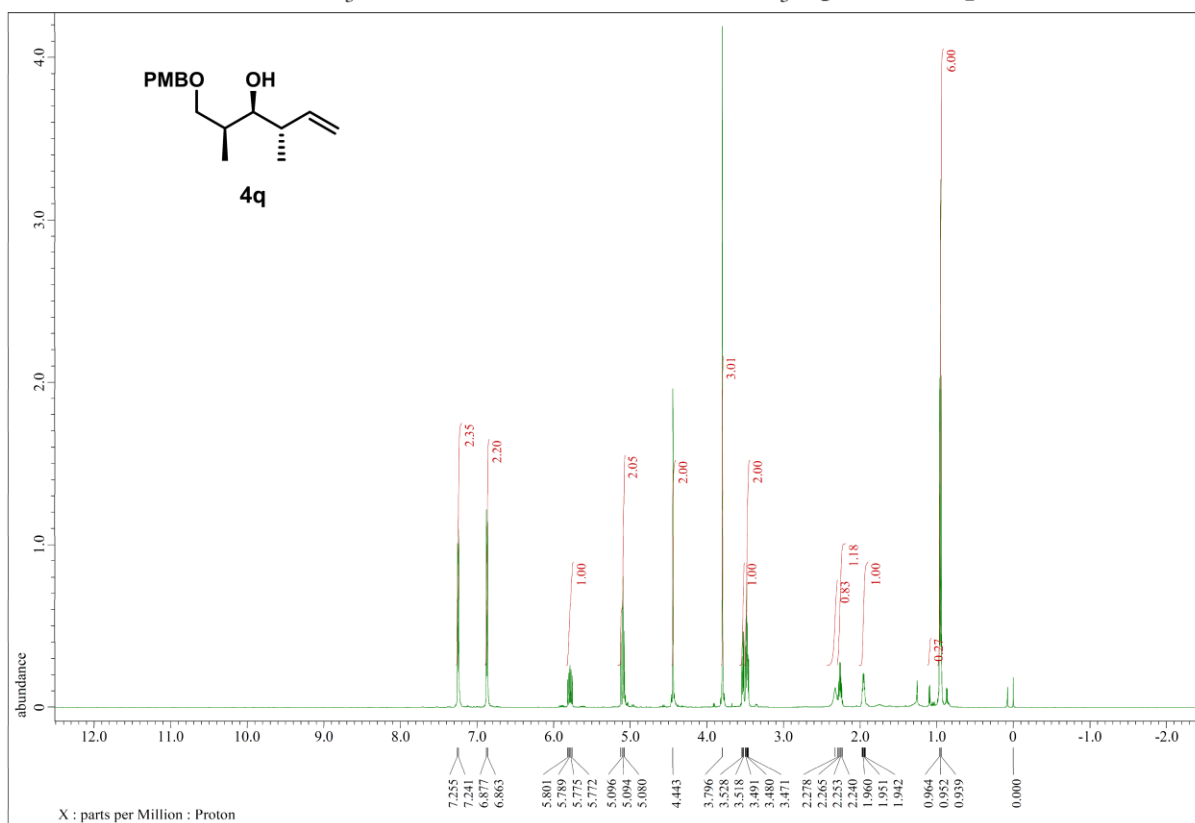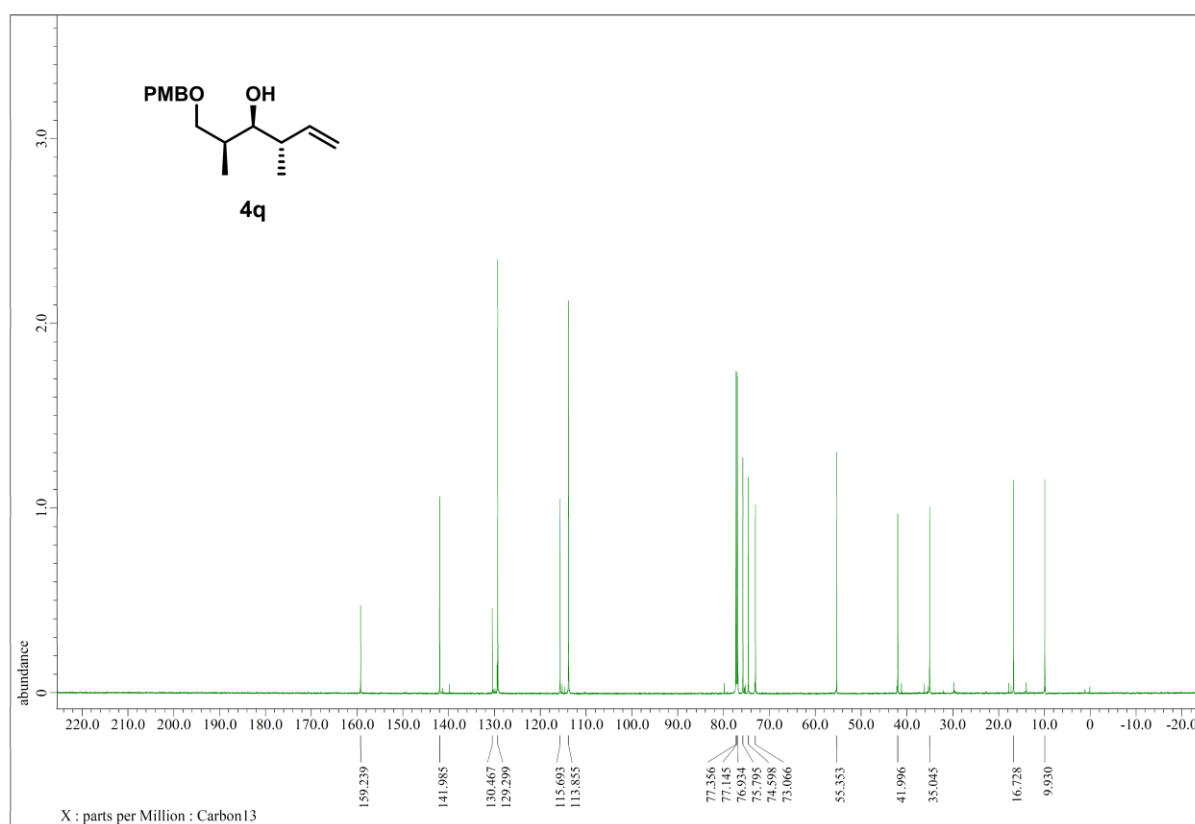

$^1\text{H}$  NMR (600 MHz,  $\text{CDCl}_3$ ) and  $^{13}\text{C}$  NMR (151 MHz,  $\text{CDCl}_3$ ) spectra of **4r**

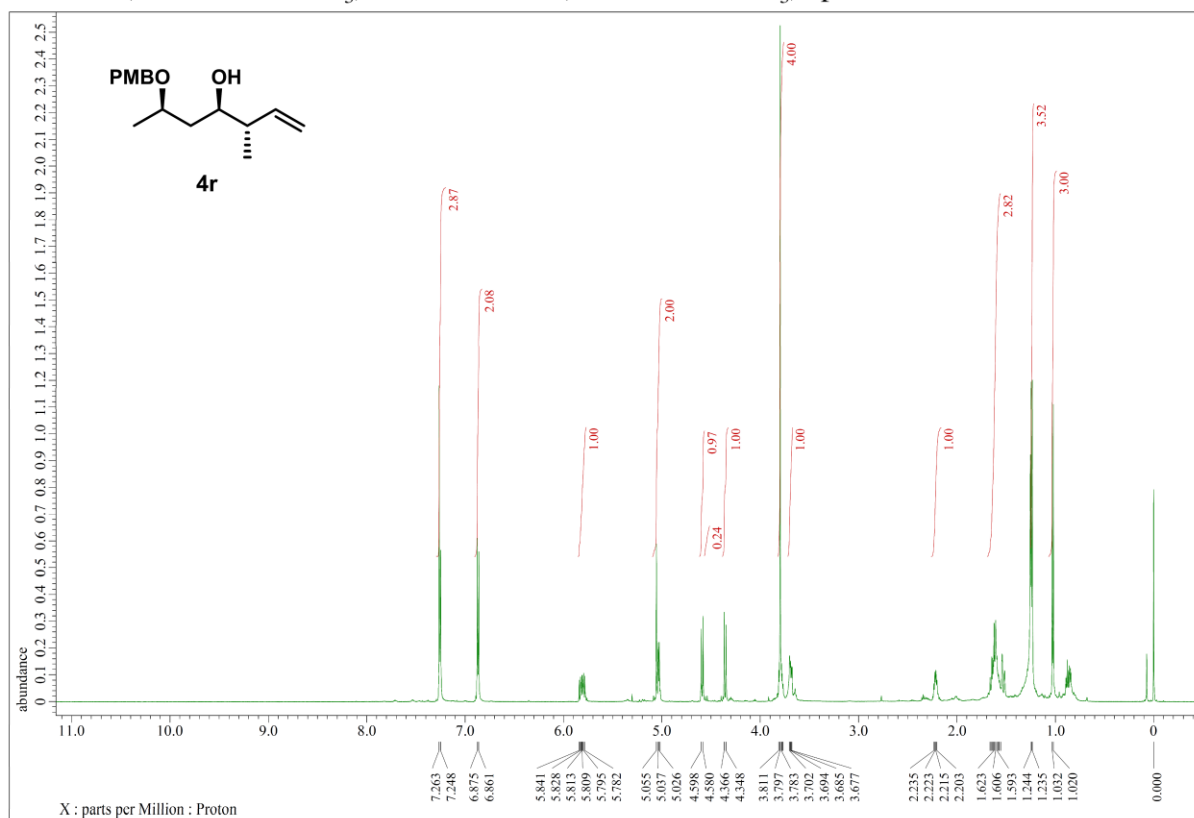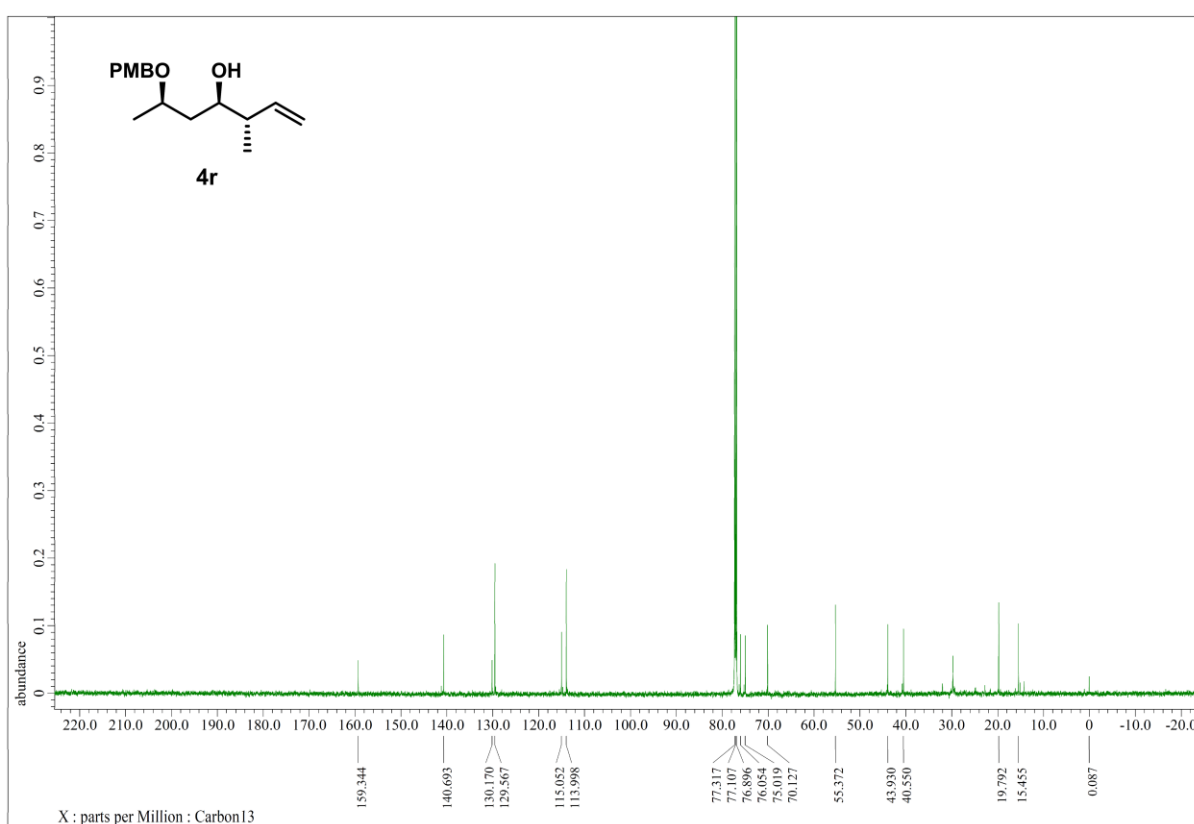

$^1\text{H}$  NMR (600 MHz,  $\text{CDCl}_3$ ) and  $^{13}\text{C}$  NMR (151 MHz,  $\text{CDCl}_3$ ) spectra of **4s**

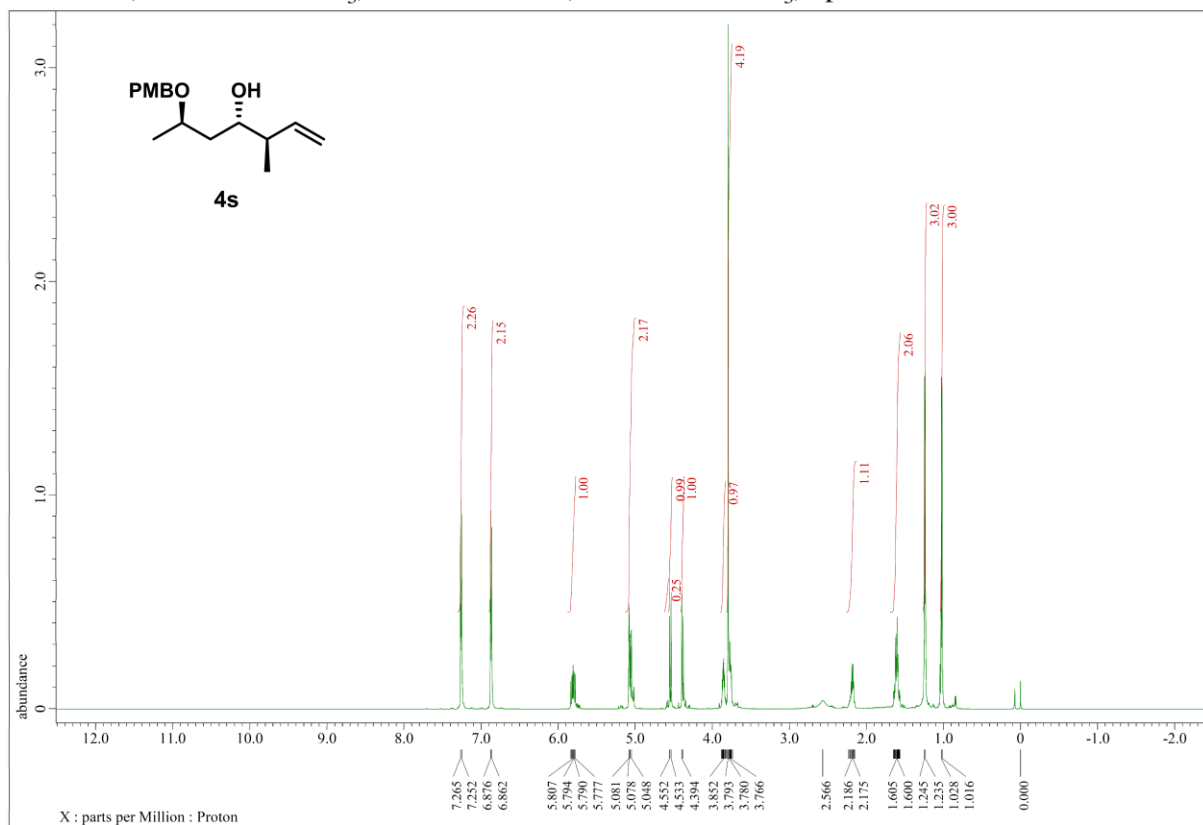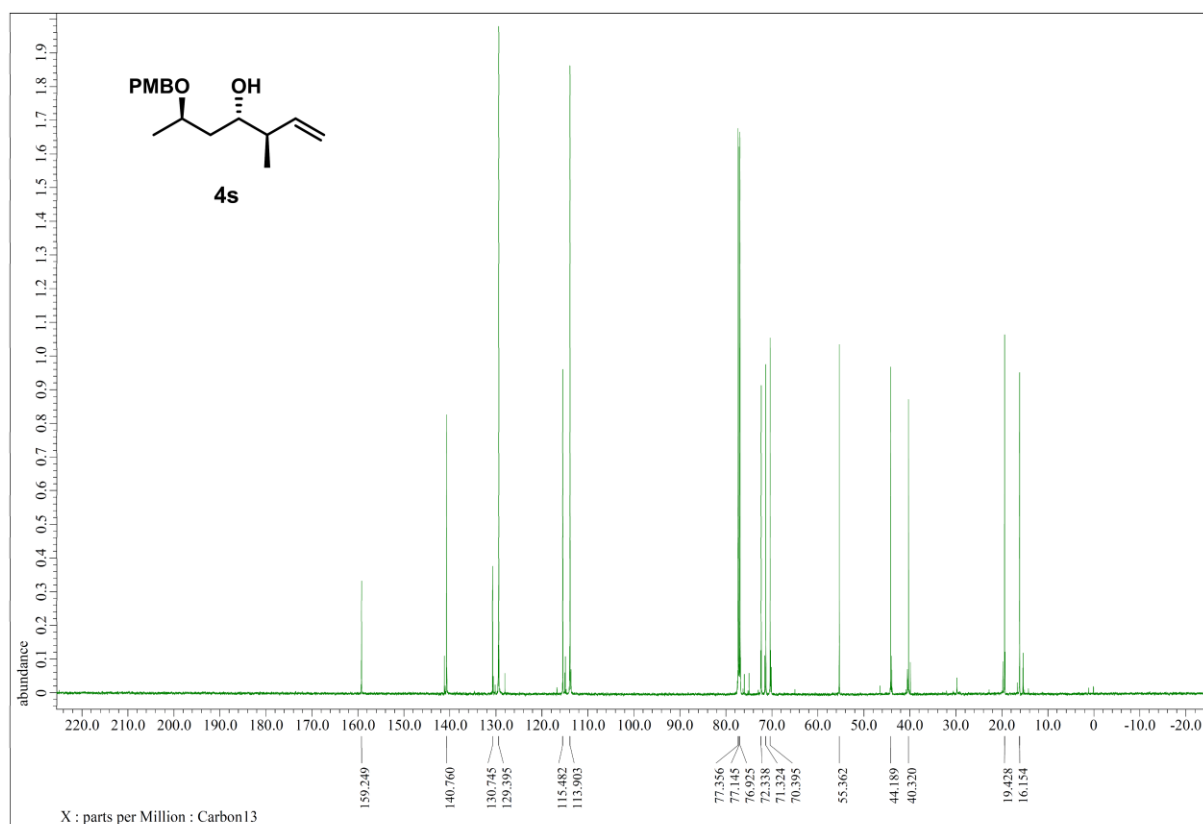

$^1\text{H}$  NMR (600 MHz,  $\text{CDCl}_3$ ) and  $^{13}\text{C}$  NMR (151 MHz,  $\text{CDCl}_3$ ) spectra of **4t**

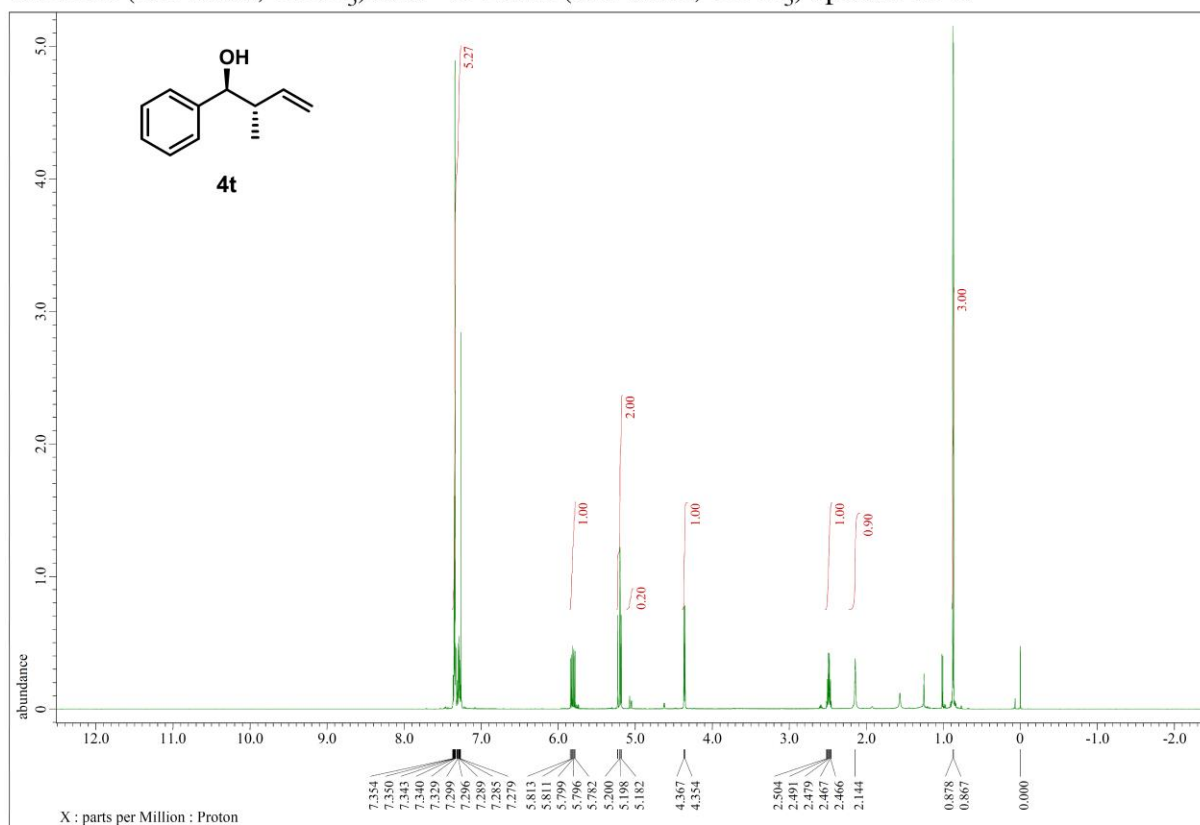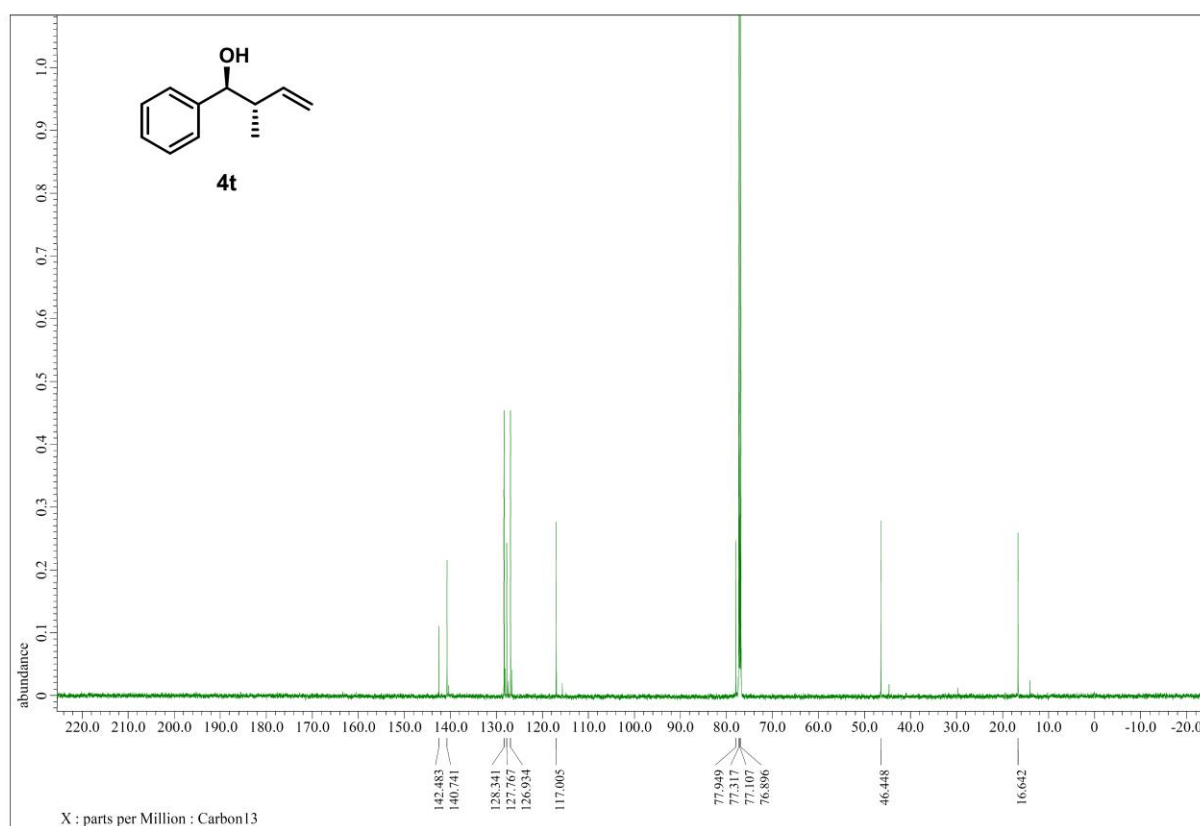



$^1\text{H}$  NMR (600 MHz,  $\text{CDCl}_3$ ) and  $^{13}\text{C}$  NMR (151 MHz,  $\text{CDCl}_3$ ) spectra of **4u**

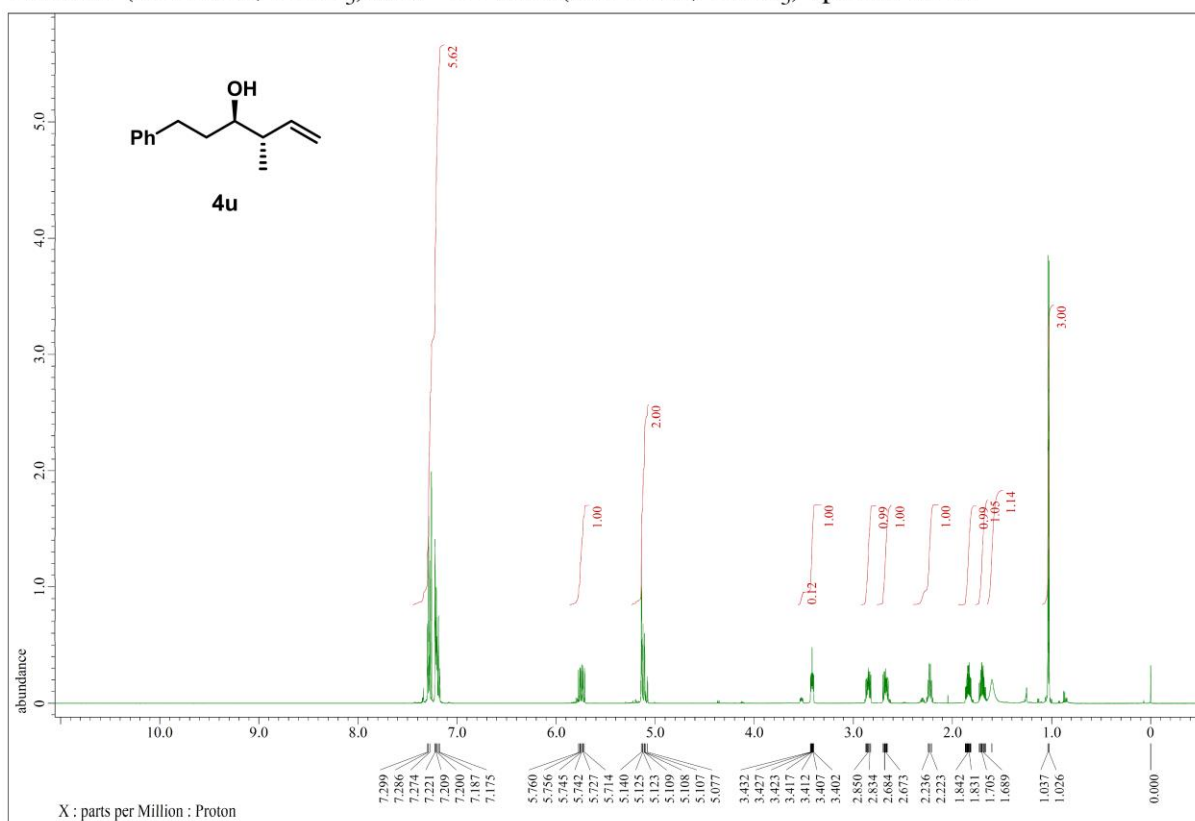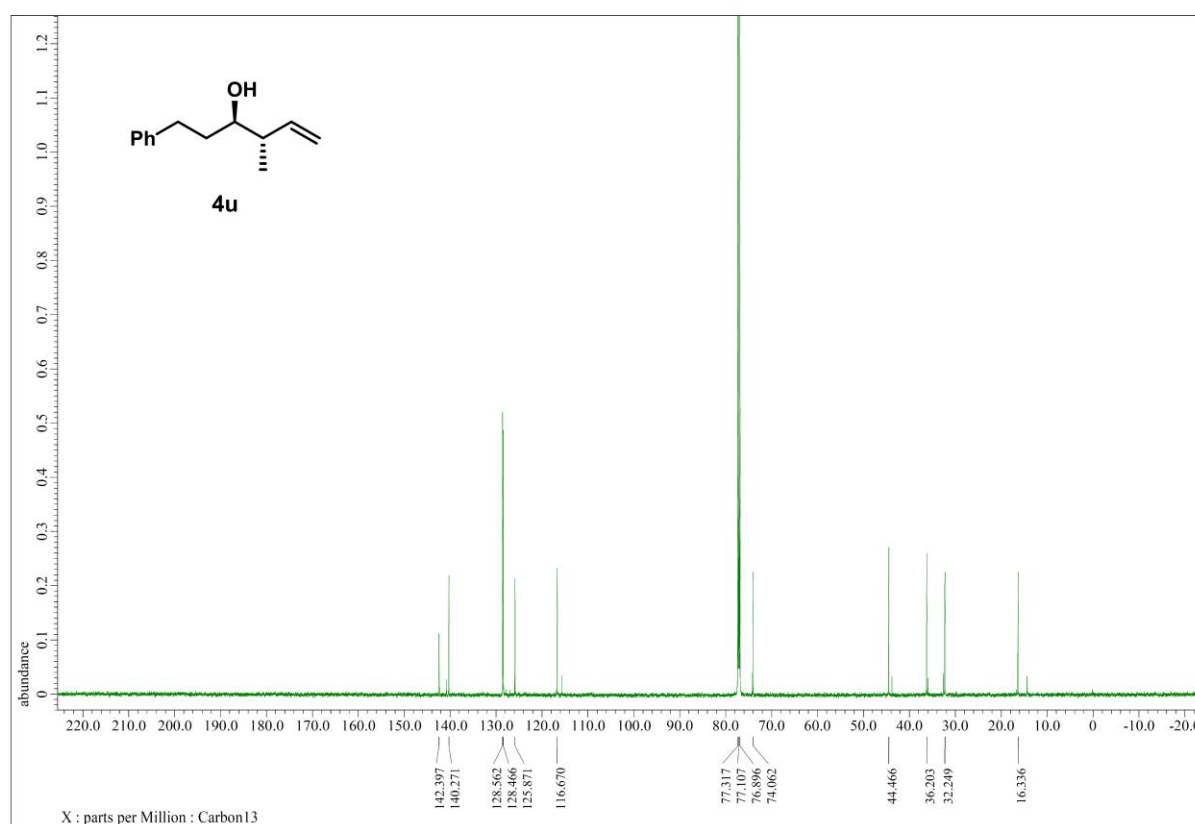

$^1\text{H}$  NMR (600 MHz,  $\text{CDCl}_3$ ) and  $^{13}\text{C}$  NMR (151 MHz,  $\text{CDCl}_3$ ) spectra of **5**

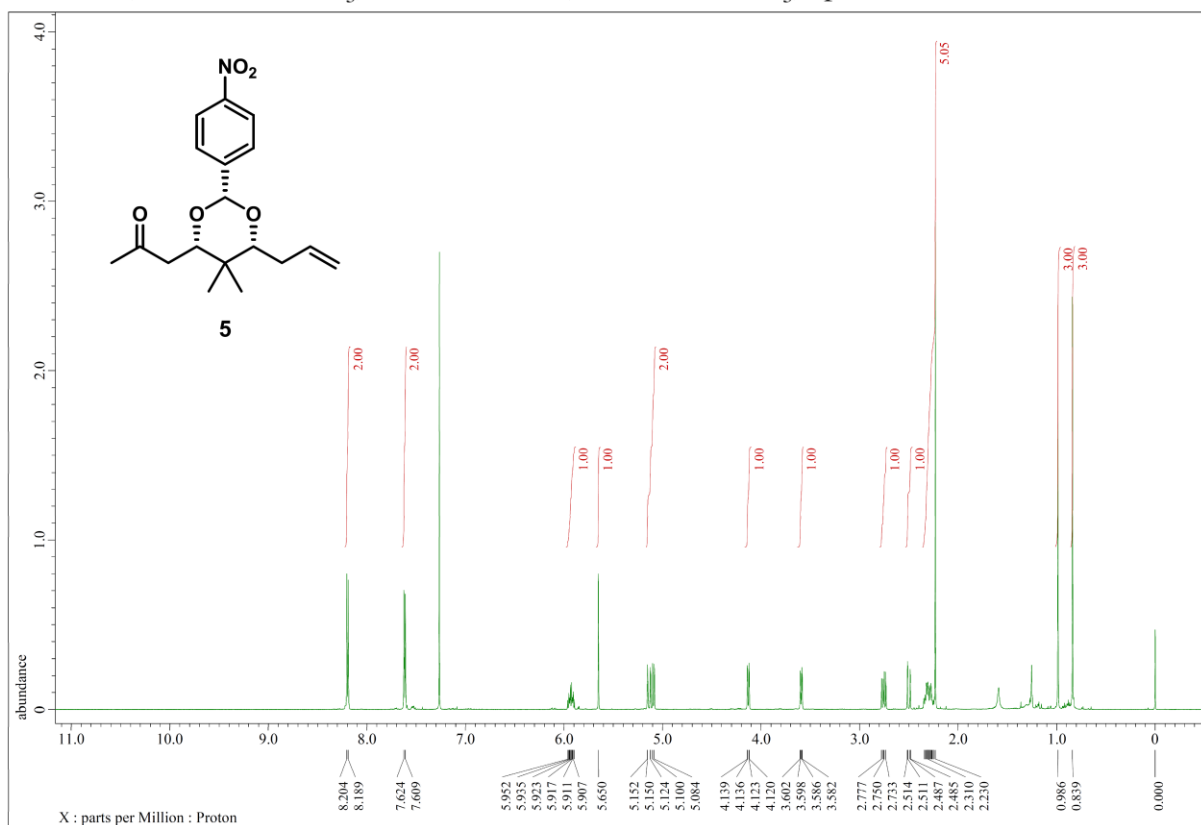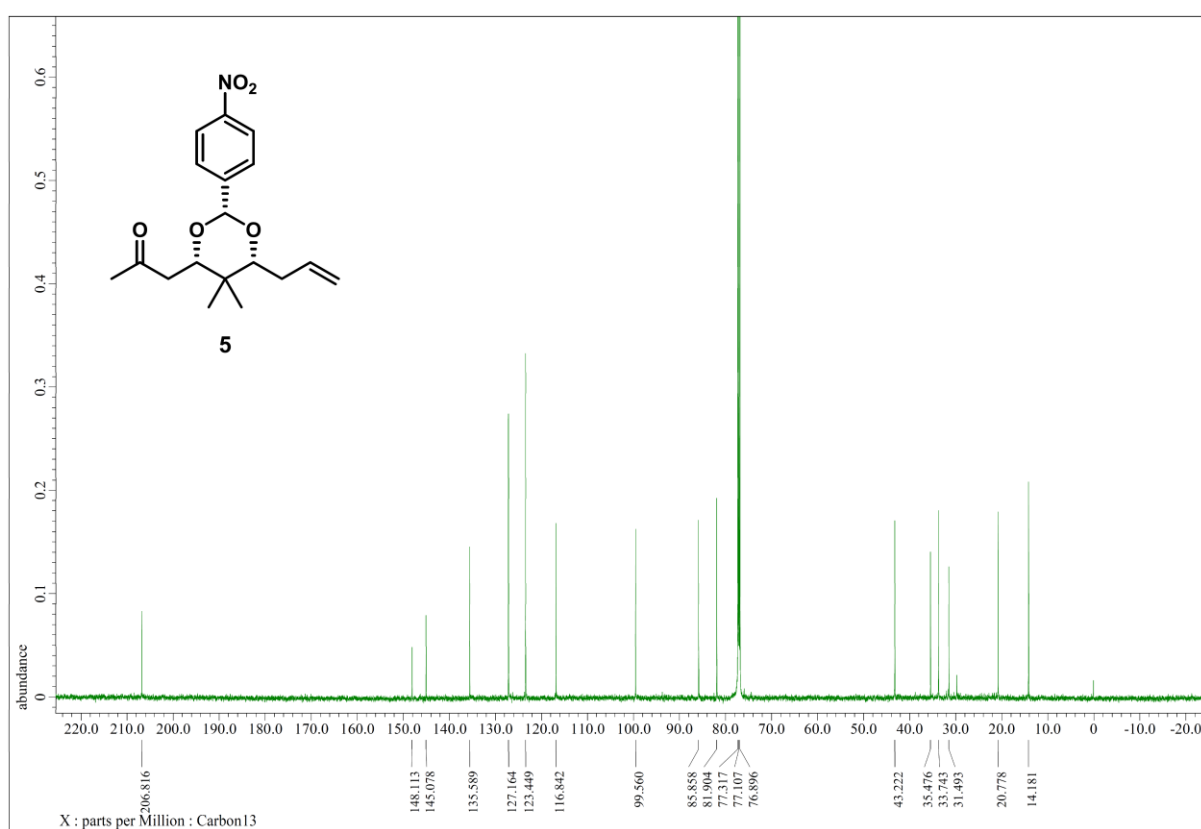

$^1\text{H}$  NMR (600 MHz,  $\text{CDCl}_3$ ) and  $^{13}\text{C}$  NMR (151 MHz,  $\text{CDCl}_3$ ) spectra of **6**

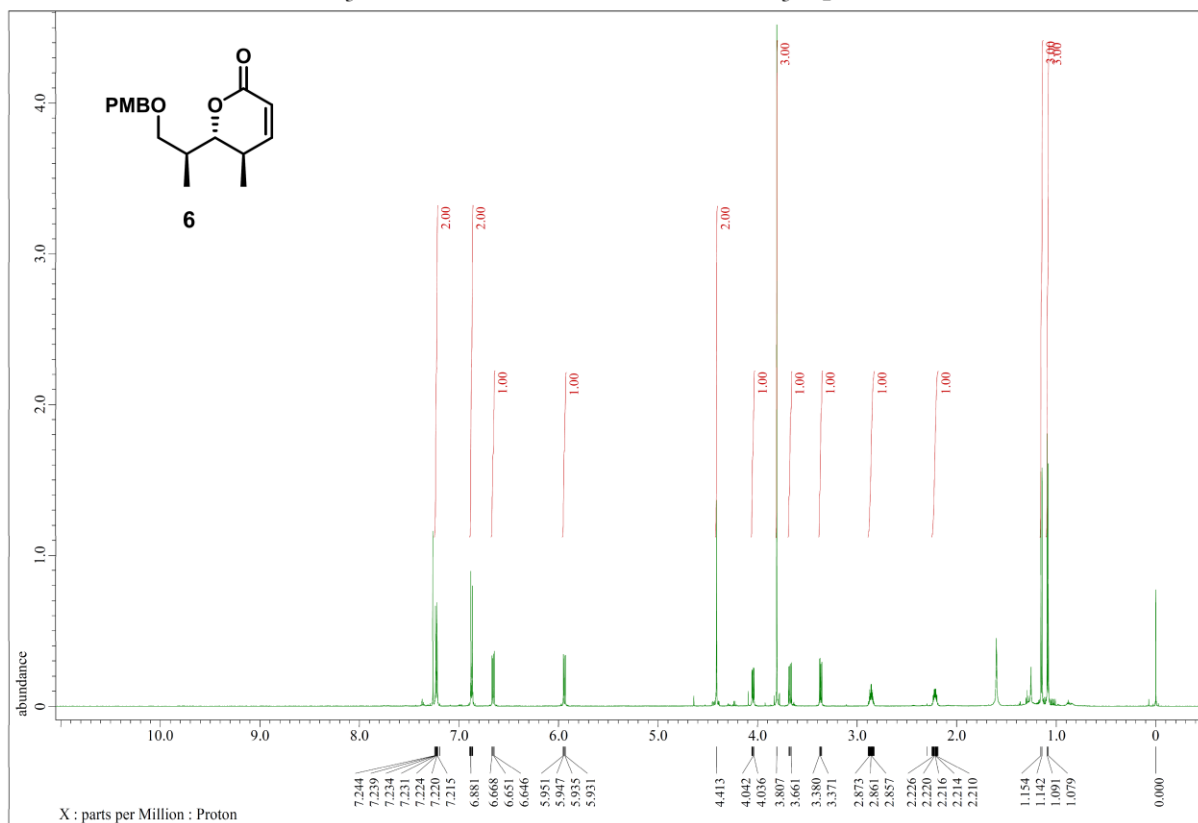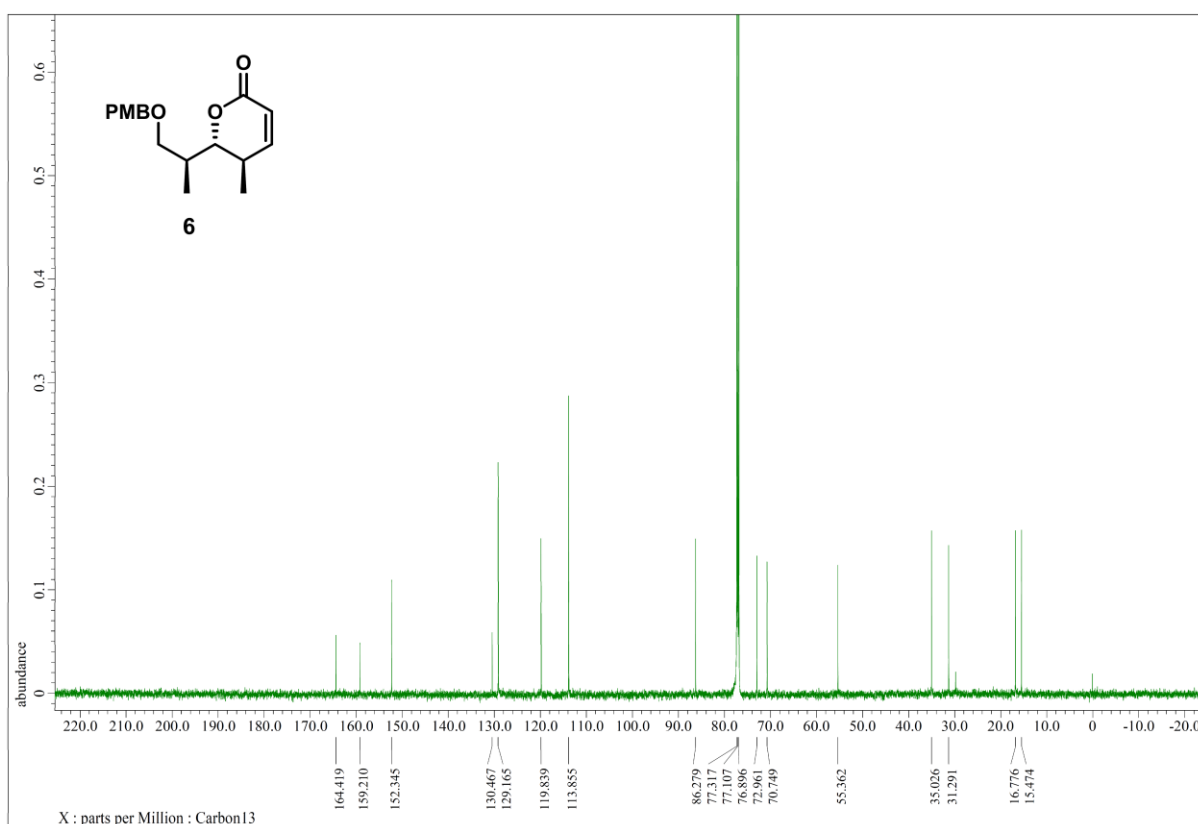

## 11. HPLC and SFC Charts

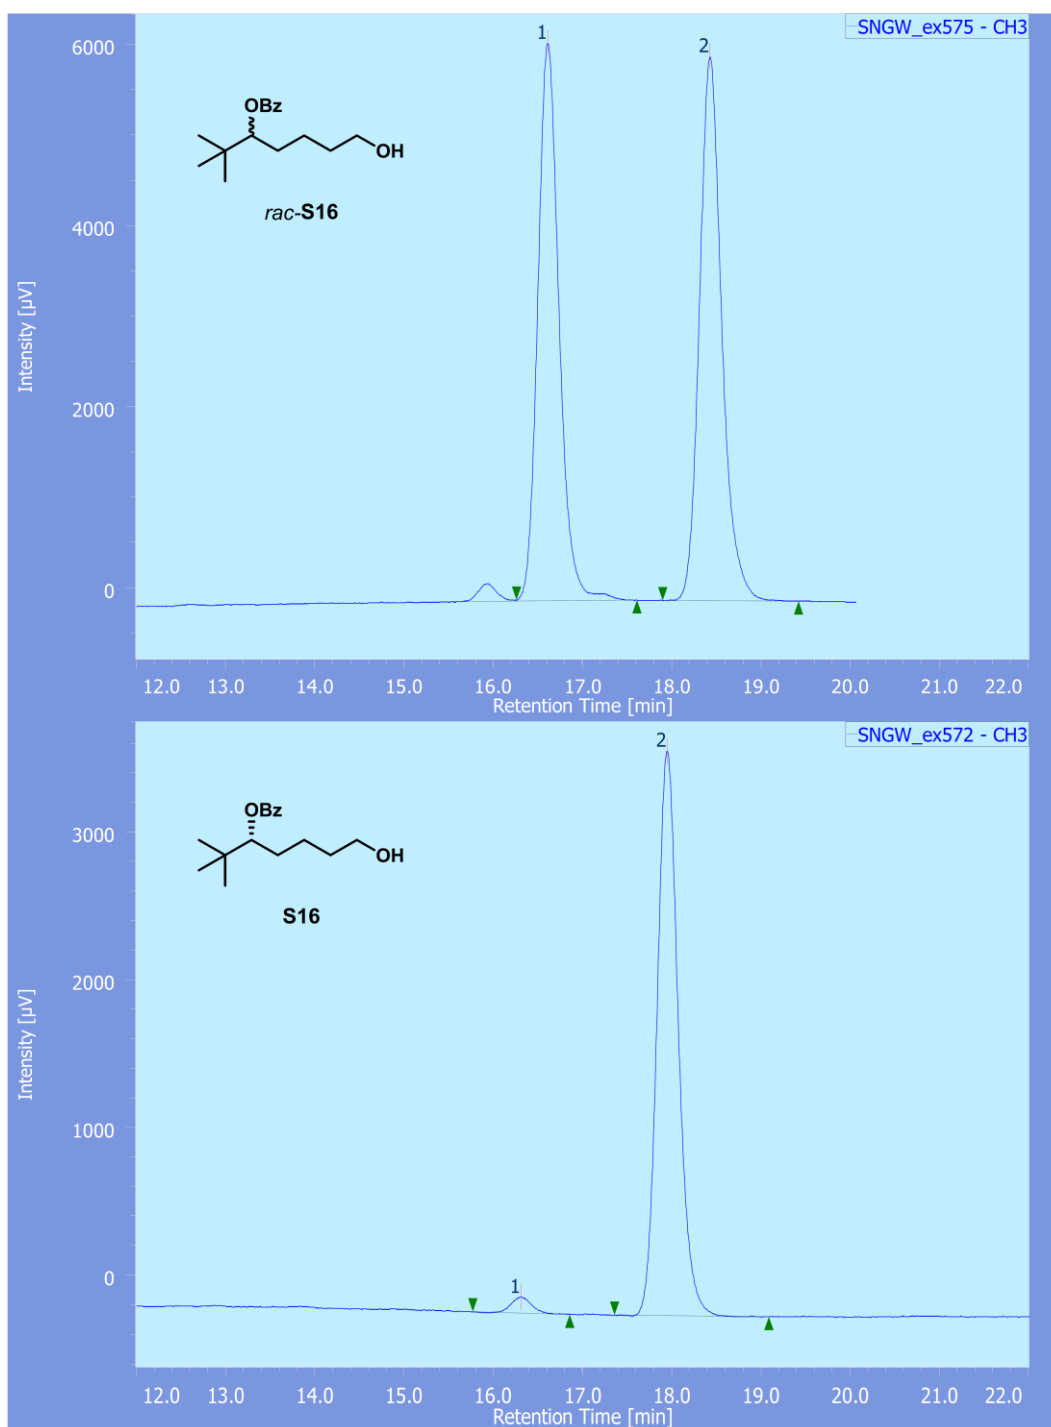

|                 | Retention time (1) | Retention time (2) | % area (1) | % area (2) |
|-----------------|--------------------|--------------------|------------|------------|
| <i>rac</i> -S16 | 16.608             | 18.425             | 49.548     | 50.452     |
| S16             | 16.308             | 17.950             | 2.622      | 97.378     |

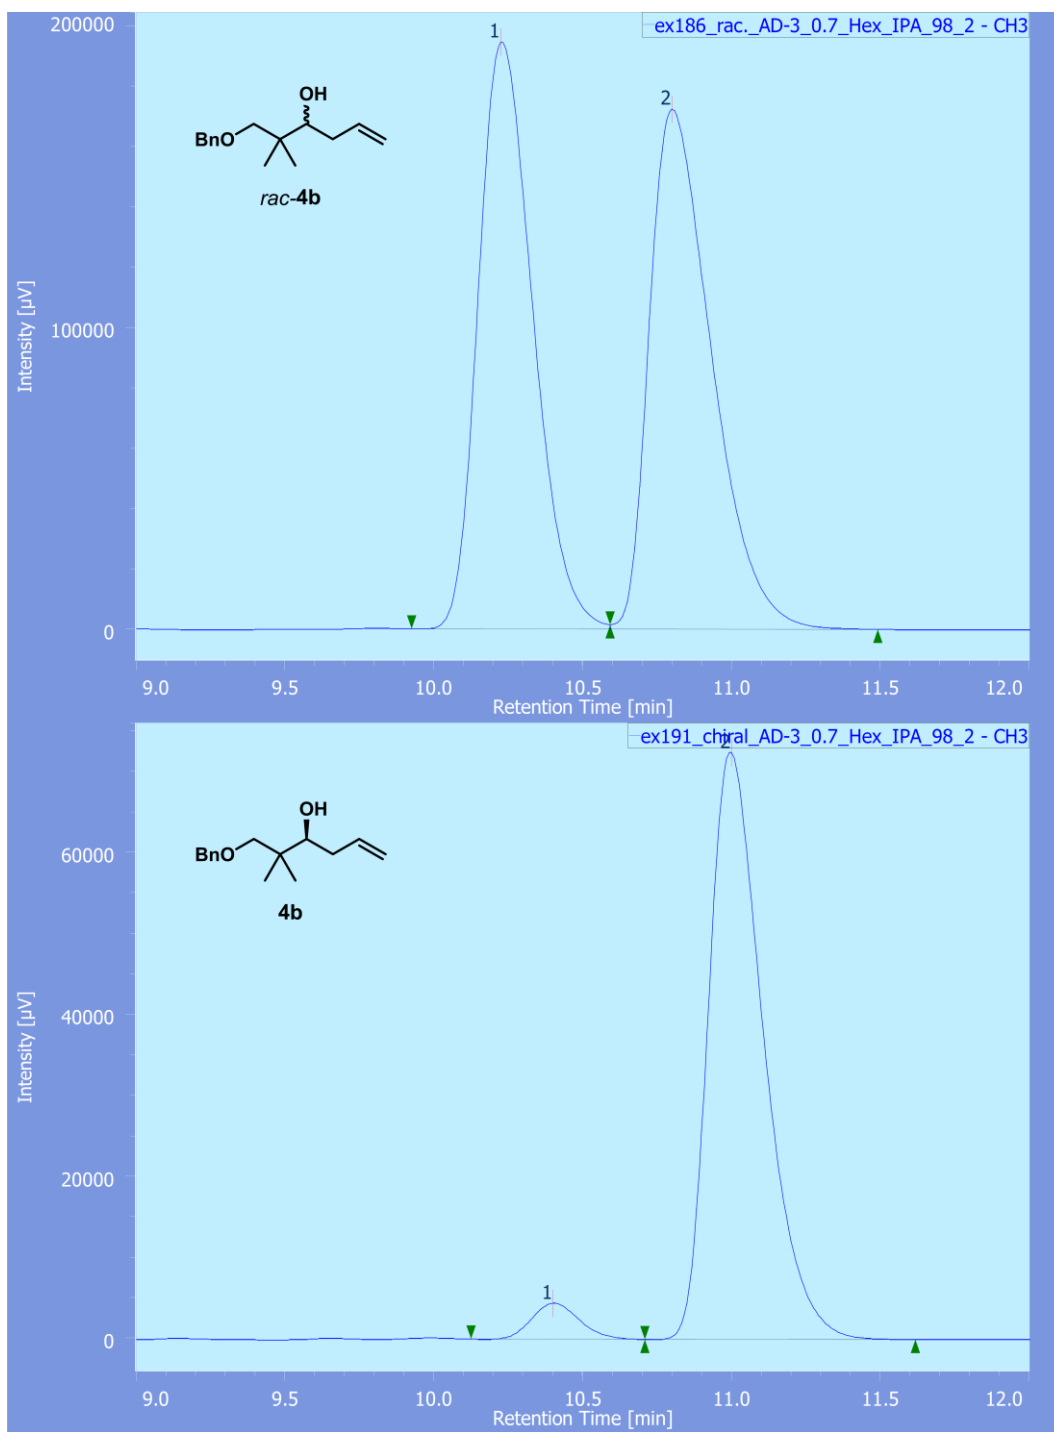

|               | Retention time (1) | Retention time (2) | % area (1) | % area (2) |
|---------------|--------------------|--------------------|------------|------------|
| <i>rac-4b</i> | 10.225             | 10.800             | 49.786     | 50.214     |
| <b>4b</b>     | 10.400             | 11.000             | 5.041      | 94.959     |

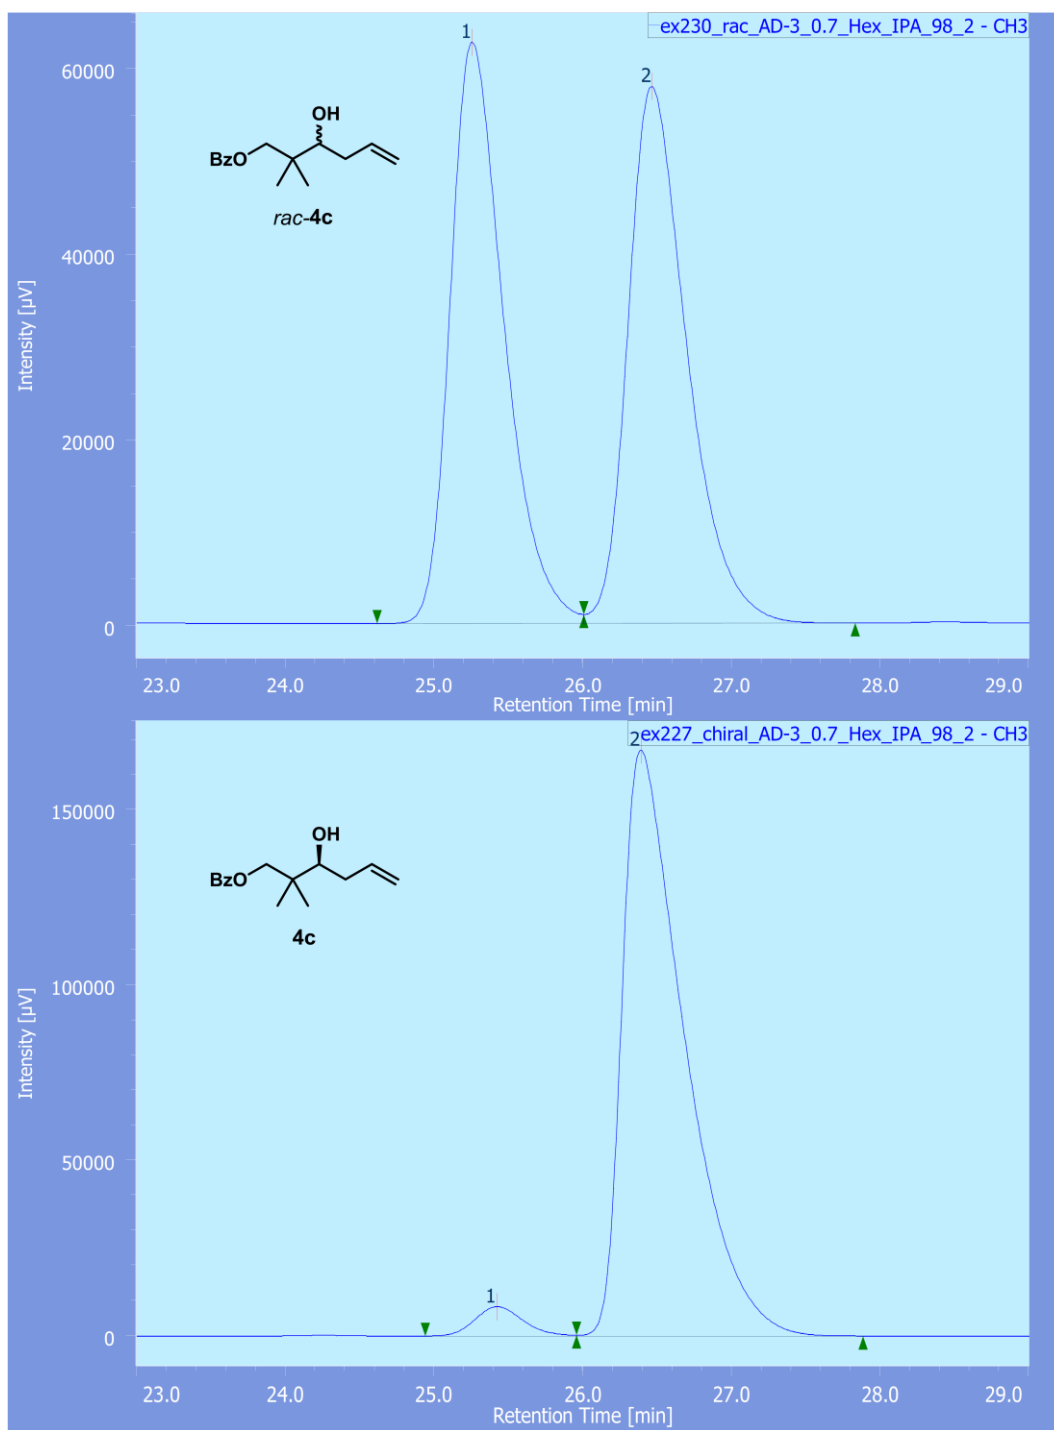

|                | Retention time (1) | Retention time (2) | % area (1) | % area (2) |
|----------------|--------------------|--------------------|------------|------------|
| <i>rac</i> -4c | 25.258             | 26.467             | 49.744     | 50.256     |
| 4c             | 25.425             | 26.392             | 3.639      | 96.361     |

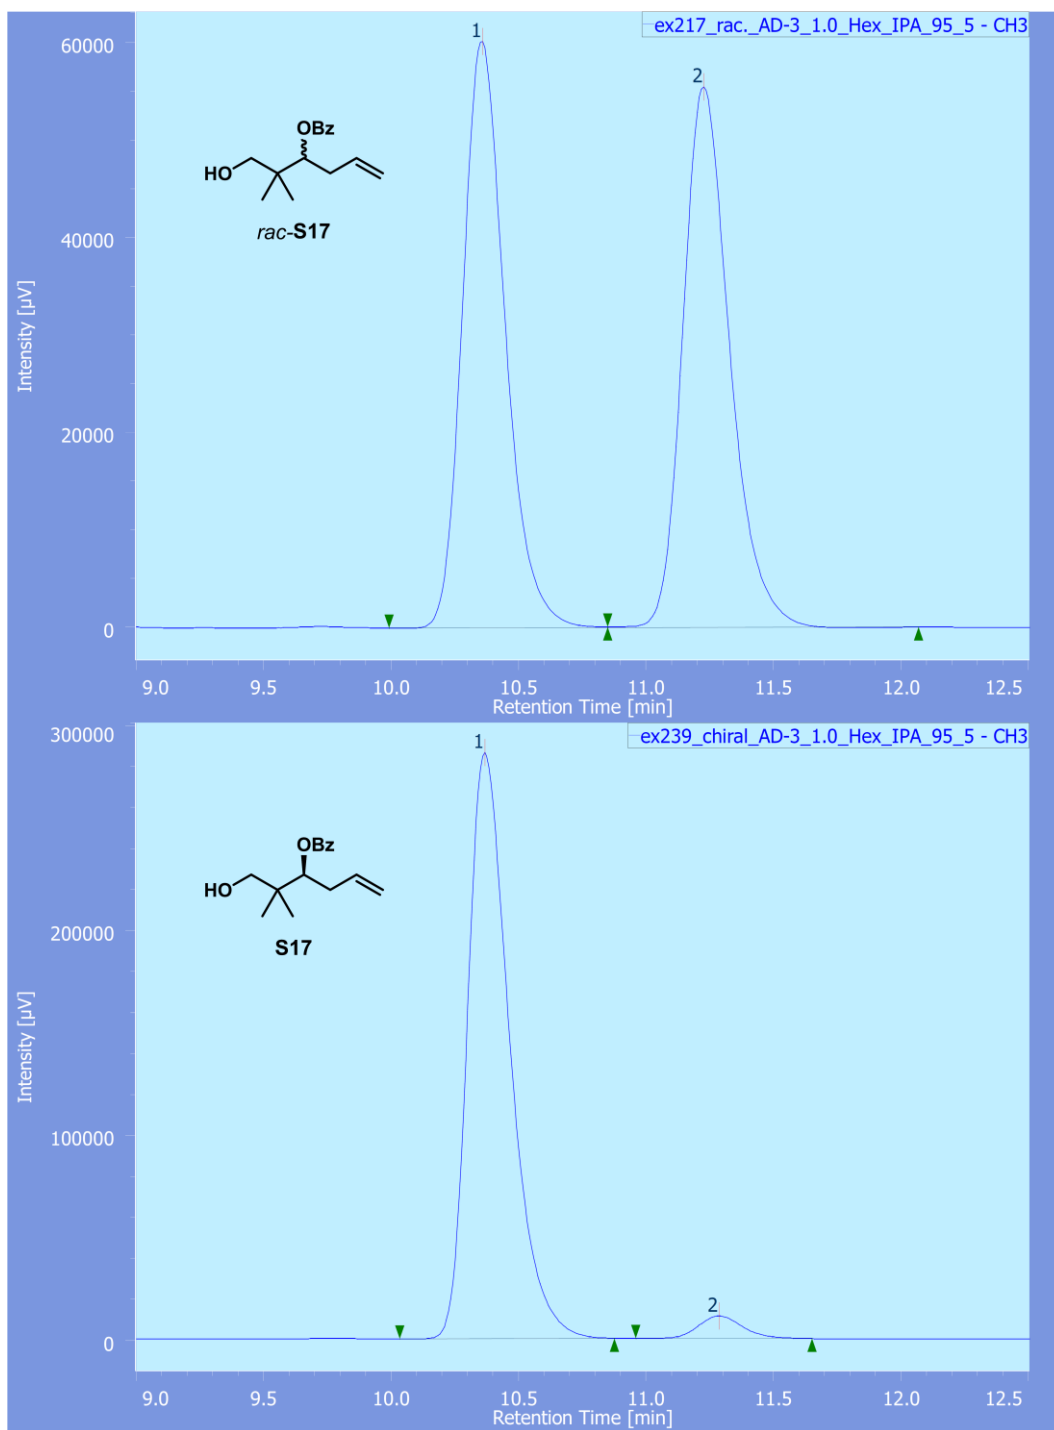

|                 | Retention time (1) | Retention time (2) | % area (1) | % area (2) |
|-----------------|--------------------|--------------------|------------|------------|
| <i>rac</i> -S17 | 10.358             | 11.225             | 49.731     | 50.269     |
| S17             | 10.367             | 11.283             | 96.064     | 3.936      |

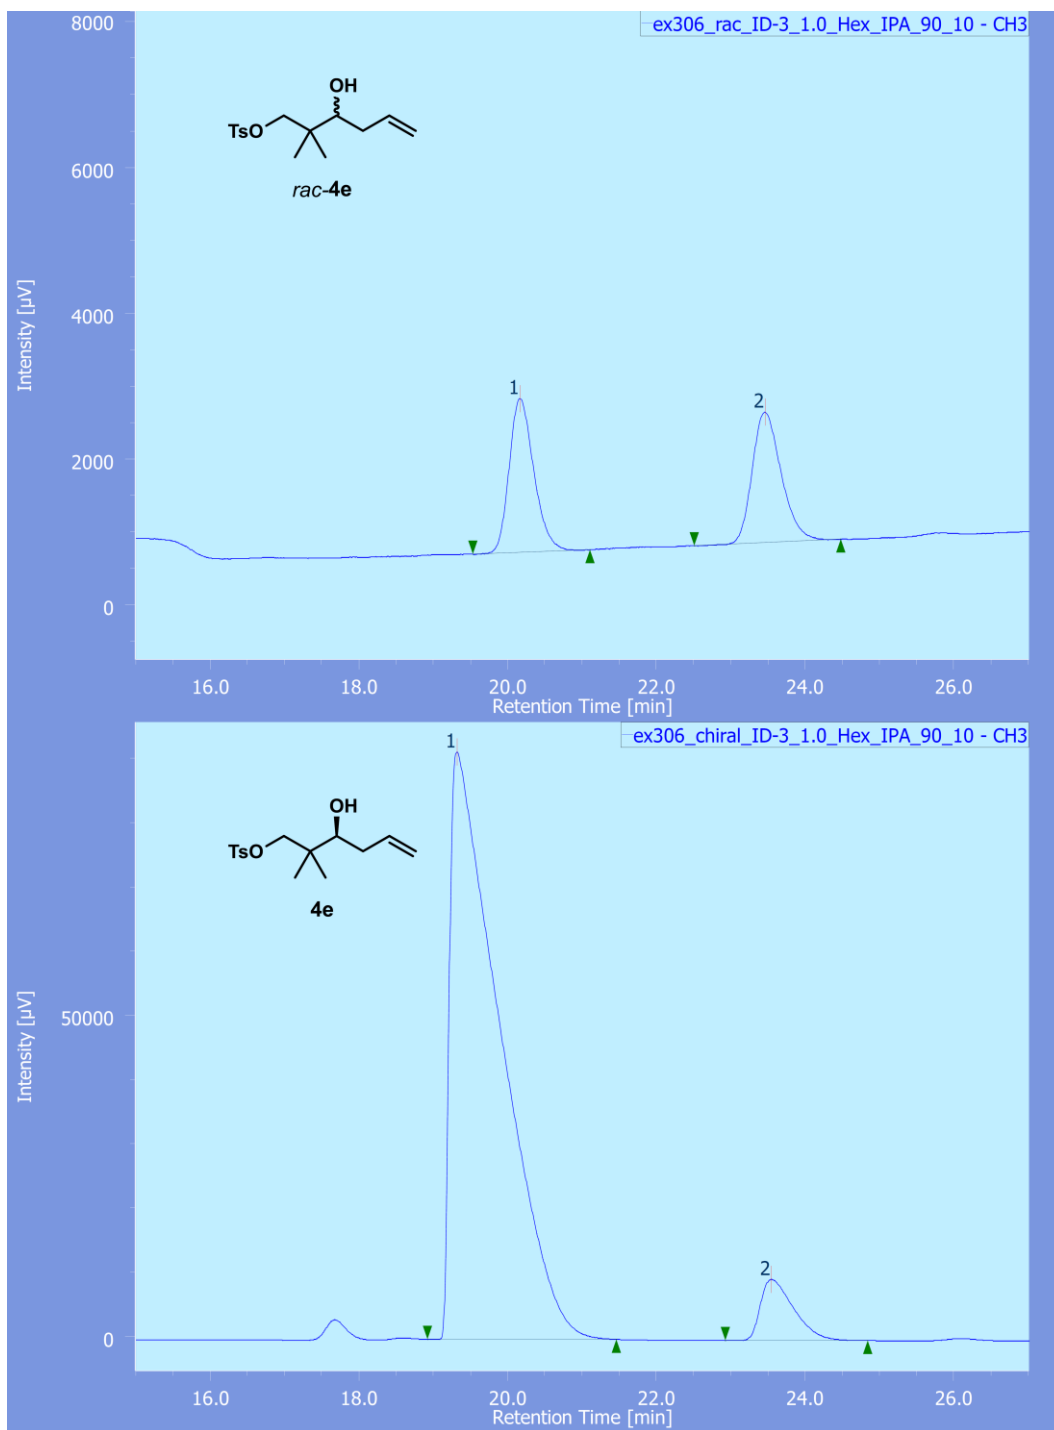

|               | Retention time (1) | Retention time (2) | % area (1) | % area (2) |
|---------------|--------------------|--------------------|------------|------------|
| <i>rac-4e</i> | 20.167             | 23.458             | 54.110     | 45.890     |
| <b>4e</b>     | 19.317             | 23.542             | 93.520     | 6.480      |



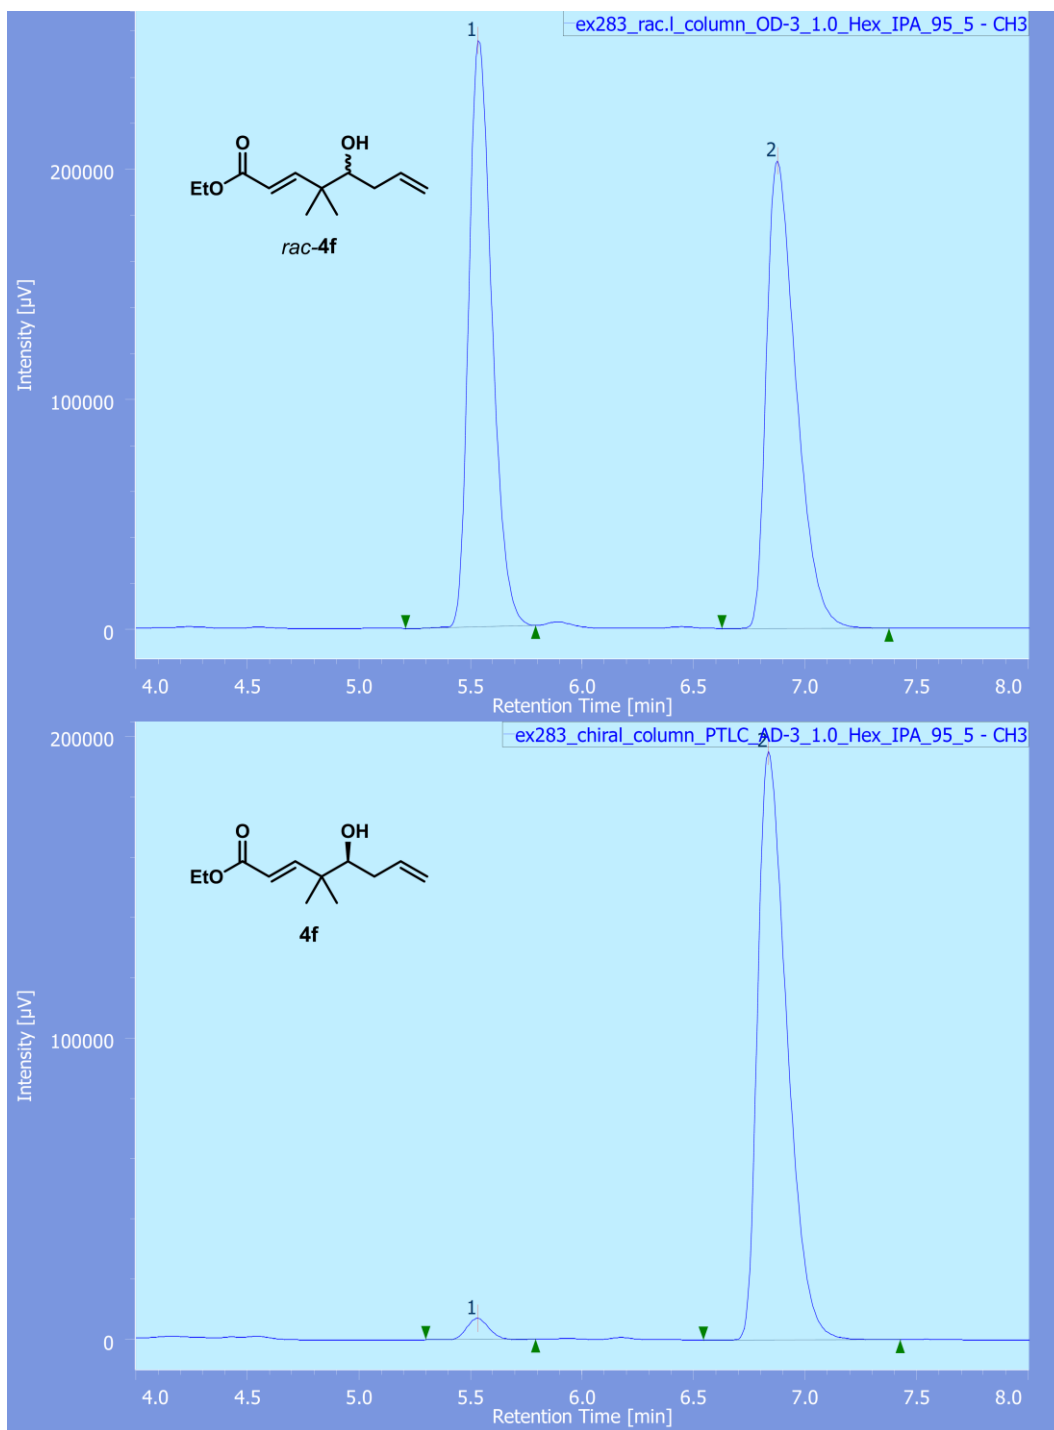

|               | Retention time (1) | Retention time (1) | % area (1) | % area (2) |
|---------------|--------------------|--------------------|------------|------------|
| <i>rac-4f</i> | 5.533              | 6.875              | 49.596     | 50.404     |
| <i>4f</i>     | 5.533              | 6.833              | 2.596      | 97.404     |

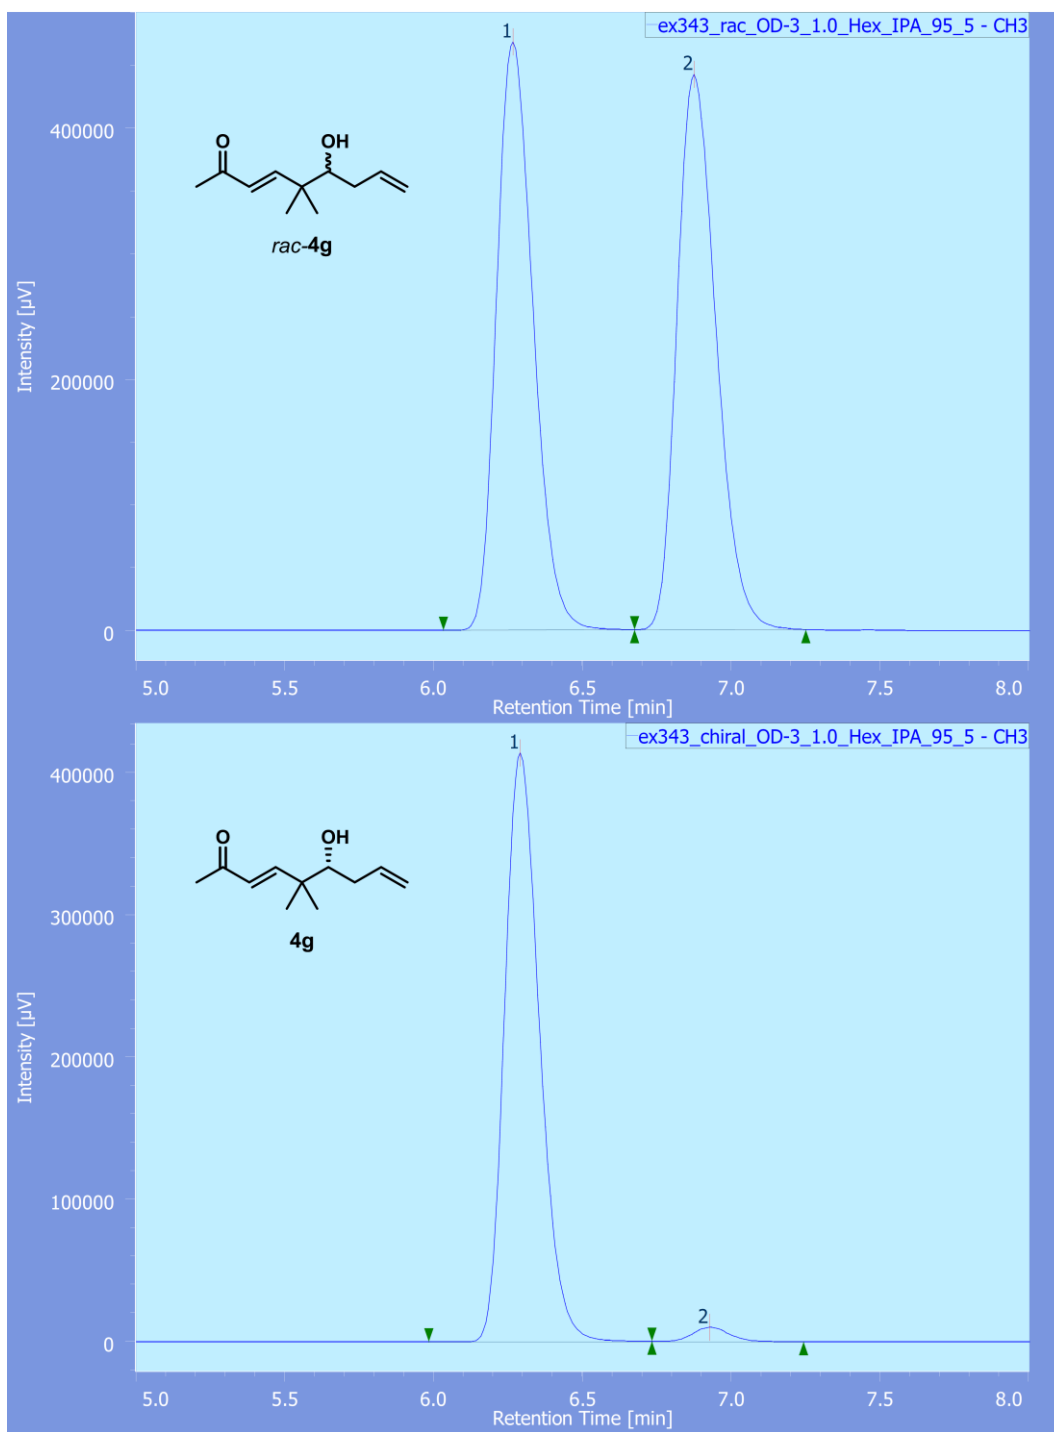

|               | Retention time (1) | Retention time (2) | % area (1) | % area (2) |
|---------------|--------------------|--------------------|------------|------------|
| <i>rac-4g</i> | 6.267              | 6.875              | 49.933     | 50.067     |
| <b>4g</b>     | 6.292              | 6.925              | 97.434     | 2.566      |

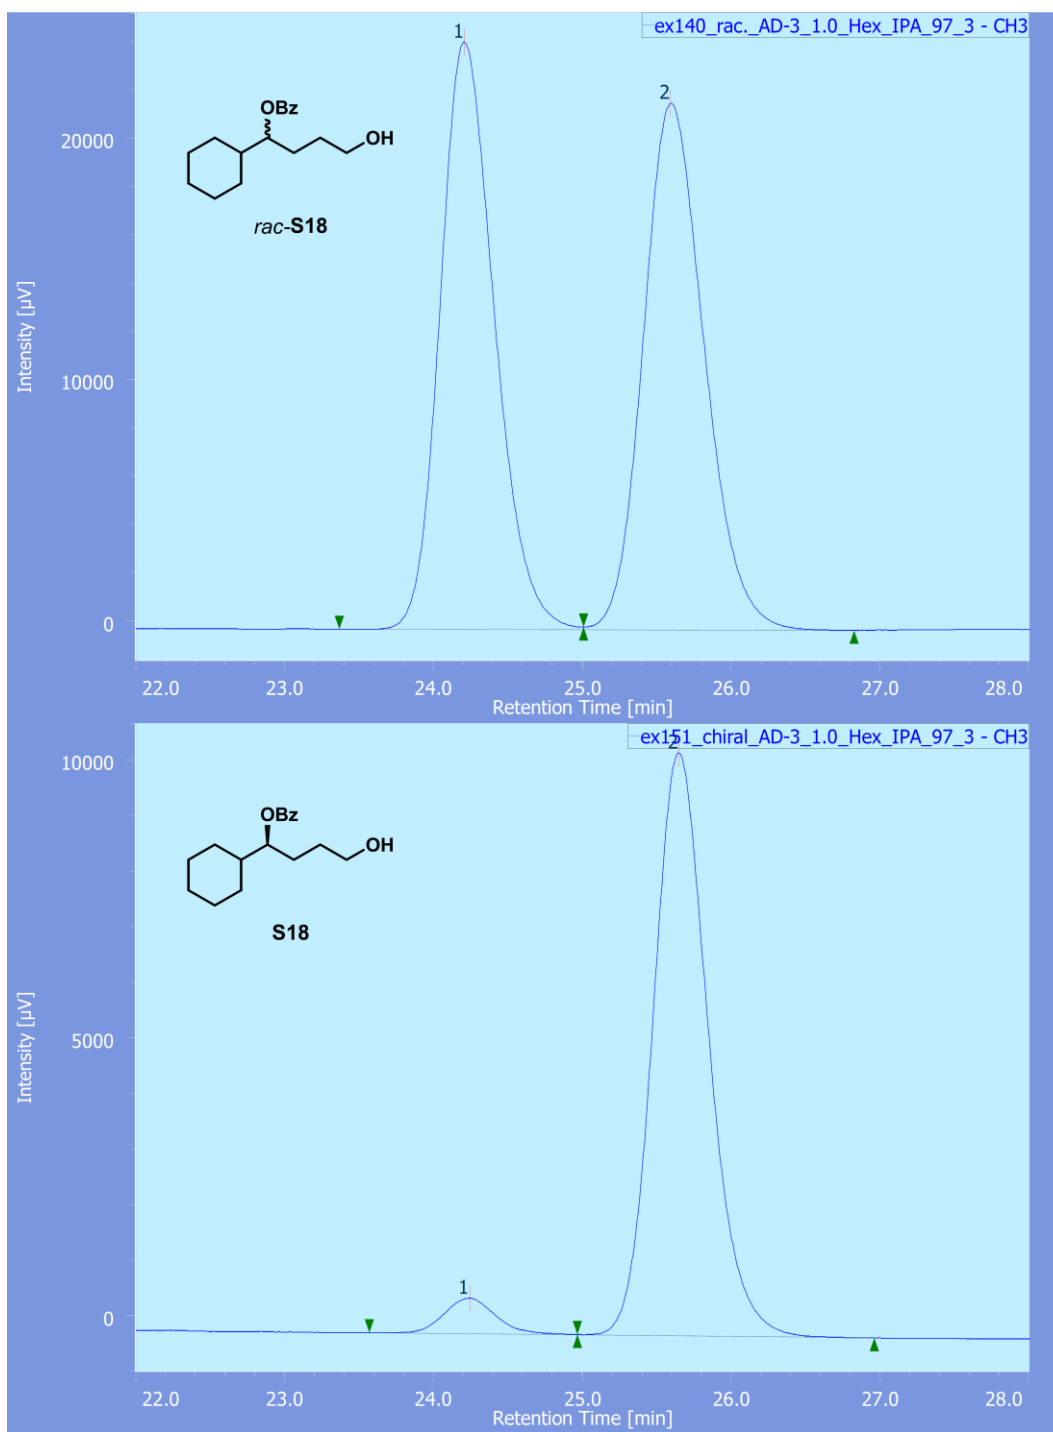

|                 | Retention time (1) | Retention time (2) | % area (1) | % area (2) |
|-----------------|--------------------|--------------------|------------|------------|
| <i>rac</i> -S18 | 24.208             | 25.592             | 49.994     | 50.006     |
| S18             | 24.242             | 25.650             | 5.765      | 94.235     |

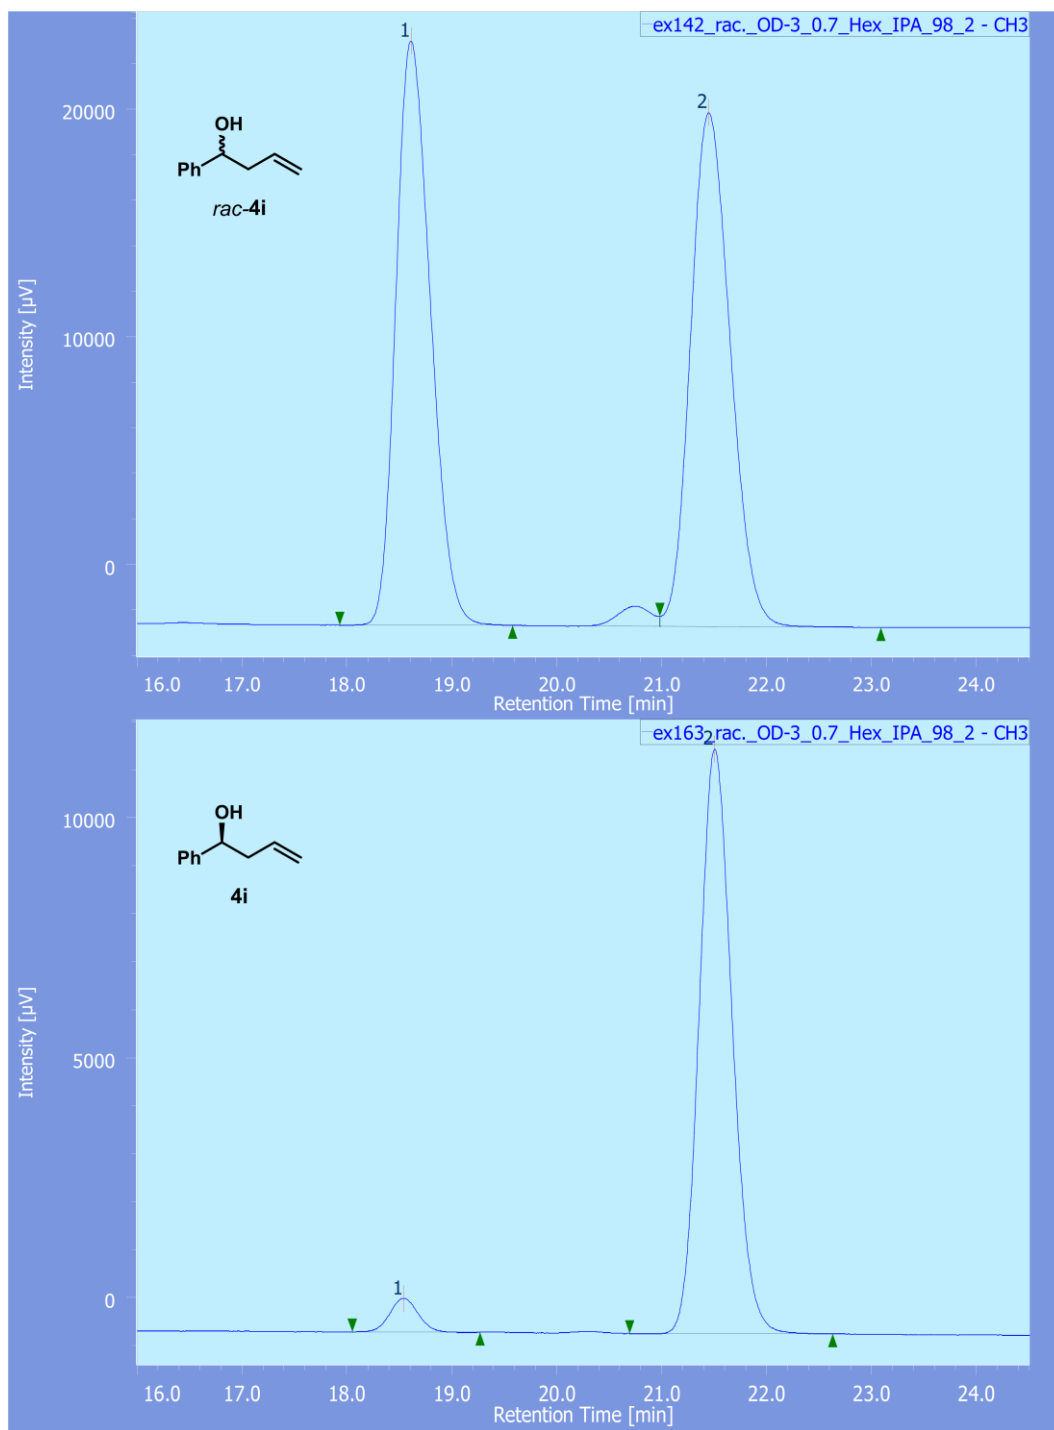

|                | Retention time (1) | Retention time (2) | % area (1) | % area (2) |
|----------------|--------------------|--------------------|------------|------------|
| <i>rac</i> -4i | 18.608             | 21.442             | 49.869     | 50.131     |
| 4i             | 18.542             | 21.500             | 4.760      | 94.557     |

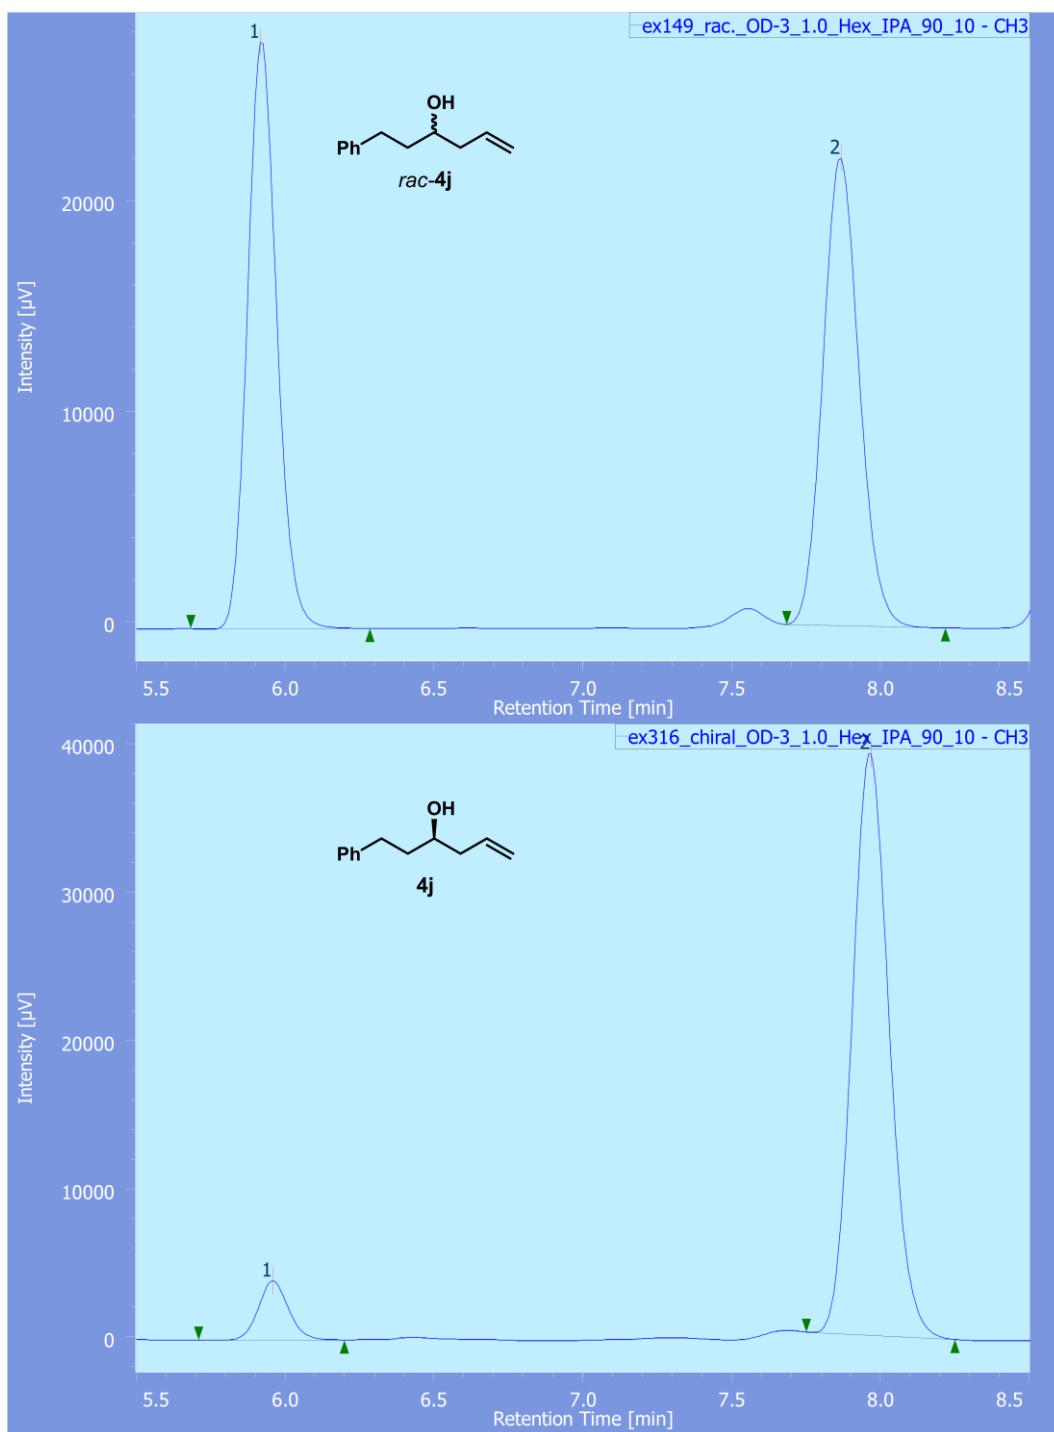

|               | Retention time (1) | Retention time (2) | % area (1) | % area (2) |
|---------------|--------------------|--------------------|------------|------------|
| <b>rac-4j</b> | 5.917              | 7.867              | 50.408     | 49.592     |
| <b>4j</b>     | 5.958              | 7.967              | 7.653      | 92.347     |

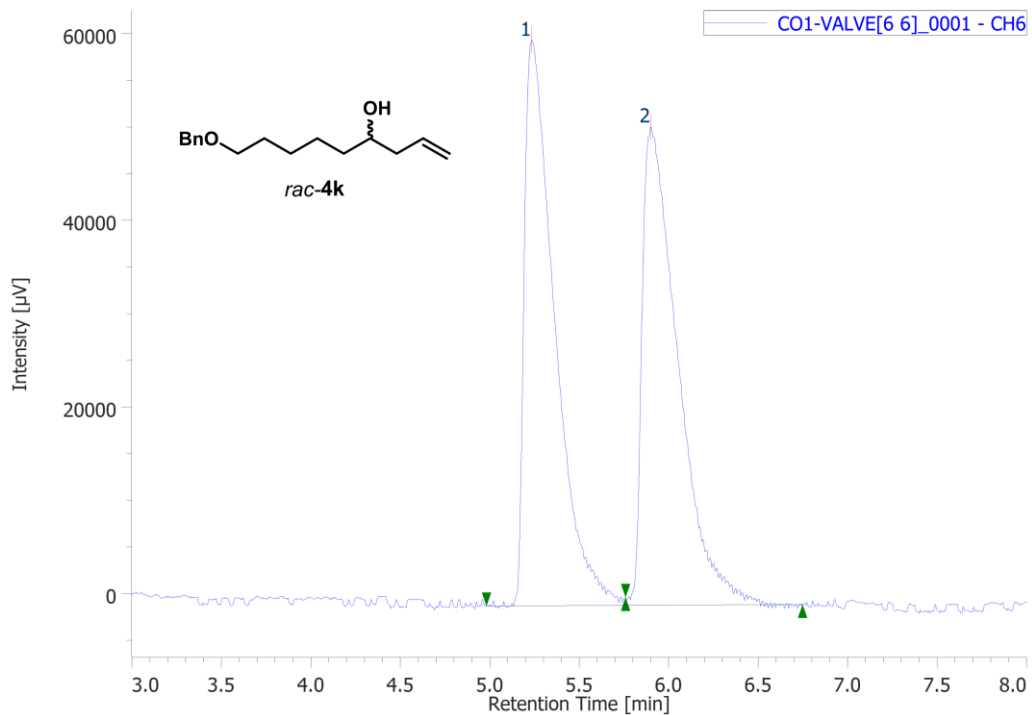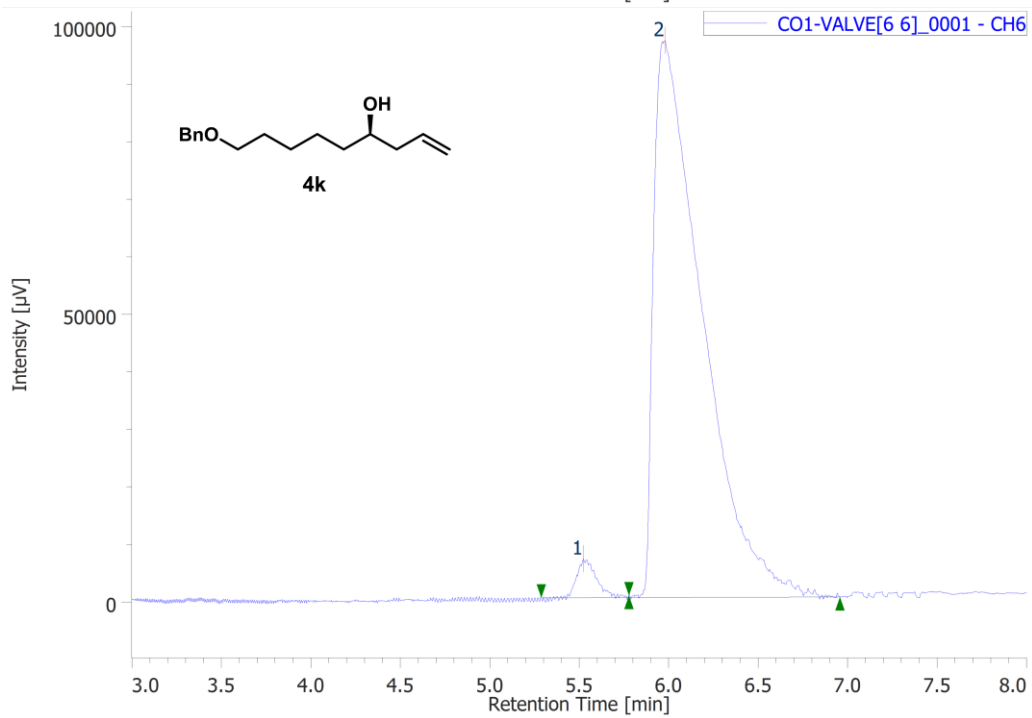

|               | Retention time (1) | Retention time (2) | % area (1) | % area (2) |
|---------------|--------------------|--------------------|------------|------------|
| <i>rac-4k</i> | 5.233              | 5.900              | 50.137     | 49.863     |
| <b>4k</b>     | 5.523              | 5.978              | 2.727      | 97.273     |

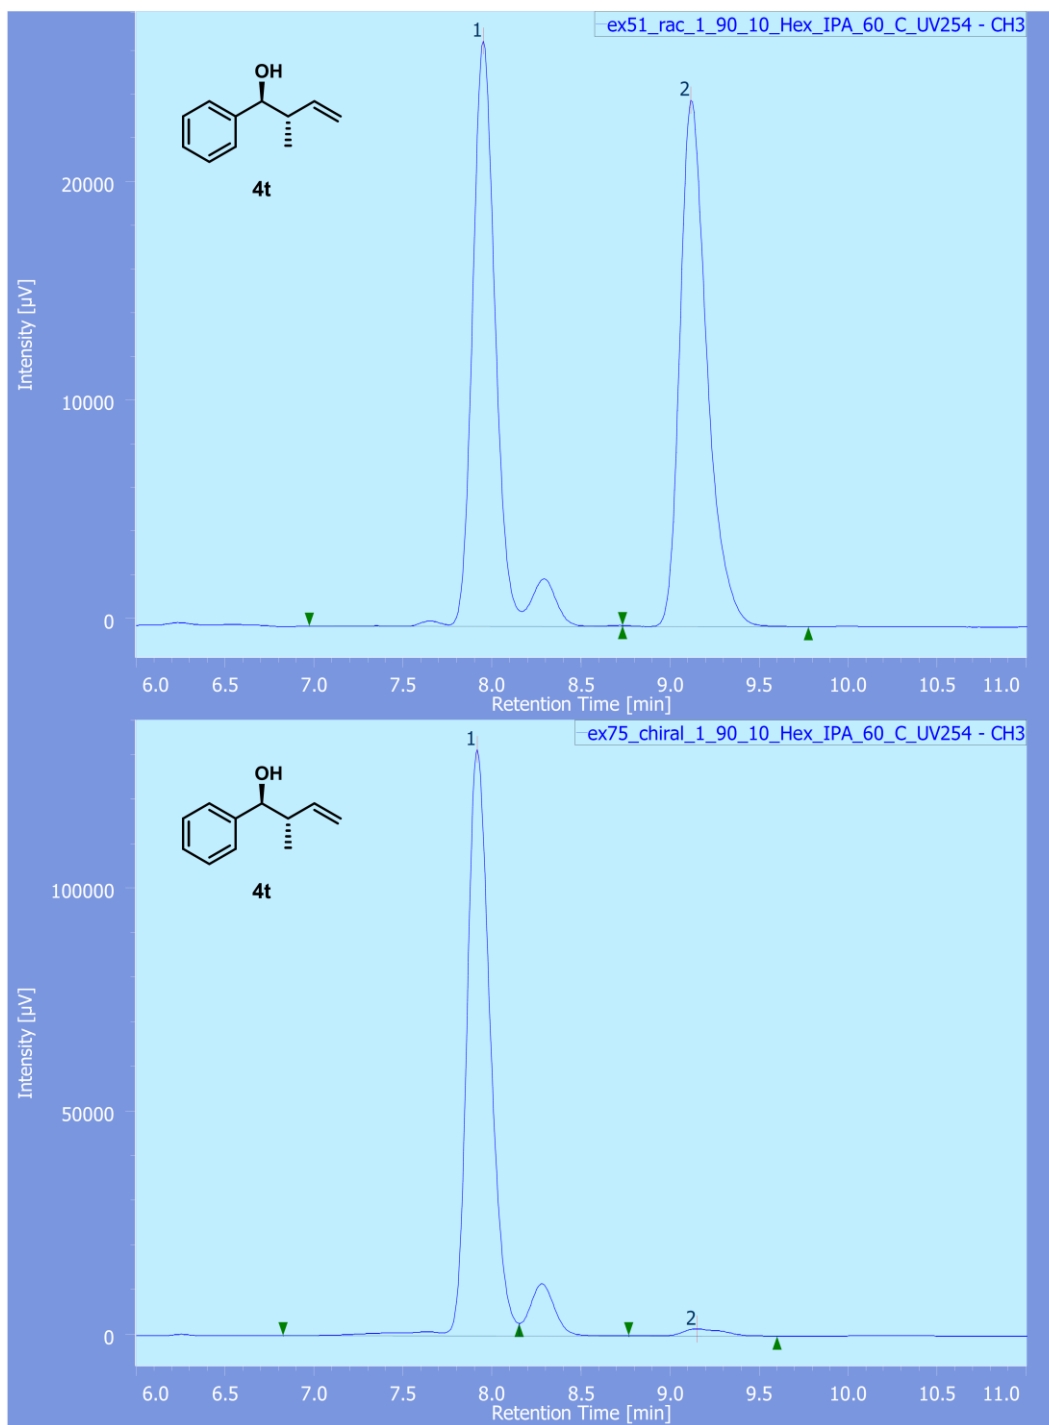

|               | Retention time (1) | Retention time (2) | % area (1) | % area (2) |
|---------------|--------------------|--------------------|------------|------------|
| <i>rac-4t</i> | 7.950              | 9.117              | 50.330     | 49.670     |
| <b>4t</b>     | 7.917              | 9.150              | 97.963     | 2.037      |

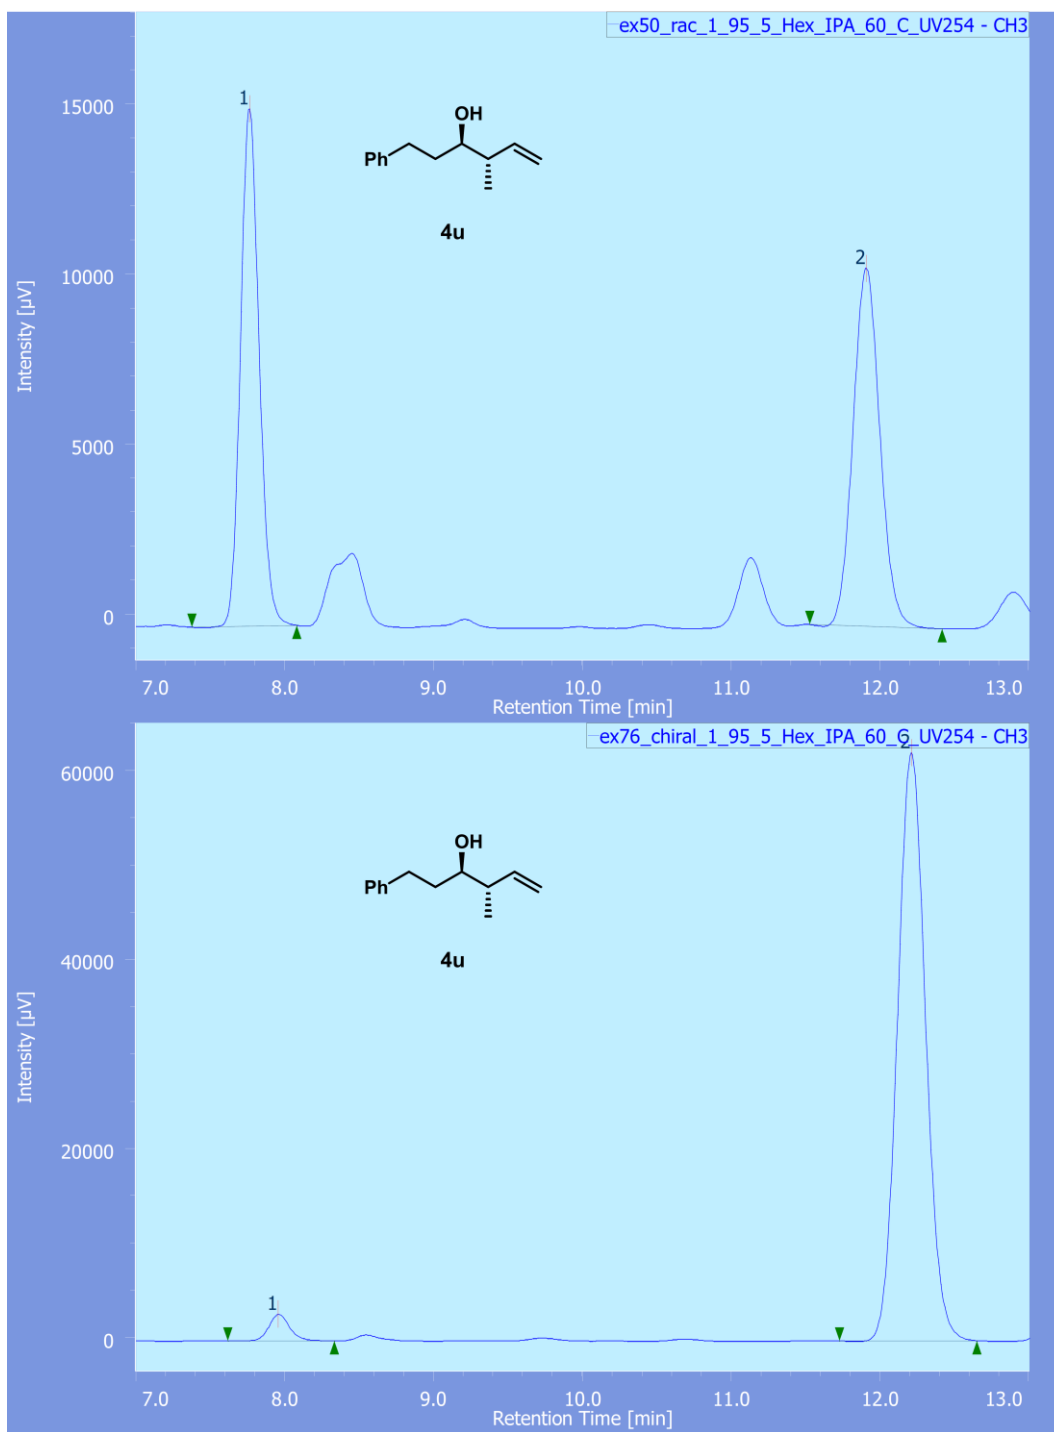

|                        | Retention time (1) | Retention time (2) | % area (1) | % area (2) |
|------------------------|--------------------|--------------------|------------|------------|
| <i>rac</i> - <b>4u</b> | 7.767              | 11.908             | 50.179     | 49.821     |
| <b>4u</b>              | 7.958              | 12.208             | 3.270      | 96.730     |
